# Supplementary material
Source: PubMed Central journal article supplement (PMC7332281)
Supplement: mmc1.pdf [file mmc1.pdf]

# THE LANCET

## Infectious Diseases

### Supplementary appendix

This appendix formed part of the original submission and has been peer reviewed. We post it as supplied by the authors.

Supplement to: Sikkem RS, Pas SD, Nieuwenhuijse DF, et al. COVID-19 in health-care workers in three hospitals in the south of the Netherlands: a cross-sectional study. *Lancet Infect Dis* 2020; published online July 2. [https://doi.org/10.1016/S1473-3099\(20\)30527-2](https://doi.org/10.1016/S1473-3099(20)30527-2).

## Supplemental table 1: Questionnaire used for healthcare workers with COVID-19

1. Hospital
2. Department
3. Position
4. Sex
5. Year of birth
6. Place of residence
7. First day of symptoms
8. History of foreign travel in 14 days prior to the onset of symptoms
  - a. Country
  - b. City
9. Attendance of a public event with 50 people or more, 14 days prior to the onset of symptoms
  - a. Type of event
  - b. City
10. Close contact to individual known with COVID-19, 14 days prior to the onset of symptoms
  - a. Type of contact
11. Day of SARS-CoV-2 test
12. Day of interview

## Supplemental table 2: Overview of possible patients- HCW transmission

|                      | Patients per ward<br>n% (no/total patients) | No Pt sequences | Positive HCWs per patient ward<br>n% (no/total pos HCW) | Patient-HCW transmission possible<br>n% (no HCW with $\leq 2$ nt compared to Pt sequences/total HCW sequences) |
|----------------------|---------------------------------------------|-----------------|---------------------------------------------------------|----------------------------------------------------------------------------------------------------------------|
| ETZ                  | N=14                                        |                 | N=44                                                    |                                                                                                                |
| Emergency department | 9 (64%)                                     | 0               | 2 (5%)                                                  | -                                                                                                              |
| Internal Medicine    | 2 (14%)                                     | 1               | 2 (5%)                                                  | 0% (0/1)                                                                                                       |
| Neurology            | 2 (14%)                                     | 2               | 4 (9%)                                                  | 0% (0/2)                                                                                                       |
| Geriatrics           | 1 (7%)                                      | 0               | 0 (0%)                                                  | -                                                                                                              |
| Other                |                                             |                 | 36 (82%)                                                |                                                                                                                |
| Amphia               | N=9                                         |                 | N=42                                                    |                                                                                                                |
| Pulmonary disease    | 5 (56%)                                     | 3               | 1 (2%)                                                  | 0% (0/1)                                                                                                       |
| Internal medicine    | 3 (33%)                                     | 3               | 0 (0%)                                                  | -                                                                                                              |
| General surgery      | 1 (11%)                                     | 1               | 7 (17%)                                                 | 29% (2/7)                                                                                                      |
| Other                |                                             |                 | 34 (81%)                                                |                                                                                                                |

Supplemental table 3: Reported statistics for the skygrid growth model run in BEAST.

| <b>Statistic</b> | <b>Mean</b> | <b>ESS</b> | <b>95% HPD interval</b>    |
|------------------|-------------|------------|----------------------------|
| joint            | -51518.008  | 629        | [-51656.0879, -51380.0997] |
| prior            | -1009.317   | 594        | [-1150.6193, -865.2255]    |
| Root age         | 2019.907    | 859        | [2019.8339, 2019.9649]     |
| Clock rate       | 1.425E-3    | 547        | [1.2593E-3, 1.5918E-3]     |
| Tree Likelihood  | -50508.691  | 2464       | [-50545.0386, -50471.7531] |
| Skygrid          | -1006.181   | 593        | [-1146.7278, -861.5688]    |

**Supplemental table 4: Characteristics of clusters of sequences in health-care workers in the south of the Netherlands in March, 2020**

|                               | Cluster 1 (n=22) | Cluster 2 (n=18) | Cluster 3 (n=6) | Total (n=50)* |
|-------------------------------|------------------|------------------|-----------------|---------------|
| <b>Residence</b>              |                  |                  |                 |               |
| Breda                         | 1 (11%)          | 6 (67%)          | 2 (22%)         | 9             |
| Prinsenbeek                   | 2 (25%)          | 5 (63%)          | 0               | 8             |
| Tilburg                       | 5 (71%)          | 0                | 1 (14%)         | 7             |
| Other city                    | 14 (54%)         | 7 (27%)          | 3 (12%)         | 26            |
| <b>Attendance at carnival</b> |                  |                  |                 |               |
| Breda                         | 1 (33%)          | 2 (67%)          | 0               | 3             |
| Prinsenbeek                   | 2 (22%)          | 6 (67%)          | 0               | 9             |
| Tilburg                       | 5 (71%)          | 0                | 1 (14%)         | 7             |
| Other                         | 4 (36%)          | 5 (45%)          | 0               | 11            |
| None                          | 10 (50%)         | 5 (25%)          | 5 (25%)         | 20            |
| <b>Hospital</b>               |                  |                  |                 |               |
| Amphia                        | 8 (27%)          | 15 (50%)         | 4 (13%)         | 30            |
| Elisabeth-TweeSteden          | 11 (79%)         | 1 (7%)           | 1 (7%)          | 14            |
| Bravis                        | 3 (50%)          | 2 (33%)          | 1 (17%)         | 6             |
| <b>Foreign travel</b>         |                  |                  |                 |               |
| Portugal                      | 0                | 1                | 0               | 1             |
| Italy                         | 2                | 0                | 1               | 3             |
| Austria                       | 1                | 0                | 1               | 2             |
| UK                            | 0                | 0                | 1               | 1             |
| Spain                         | 1                | 0                | 0               | 1             |

Data are n (% of total). \*Including four sequences unassigned to any cluster.

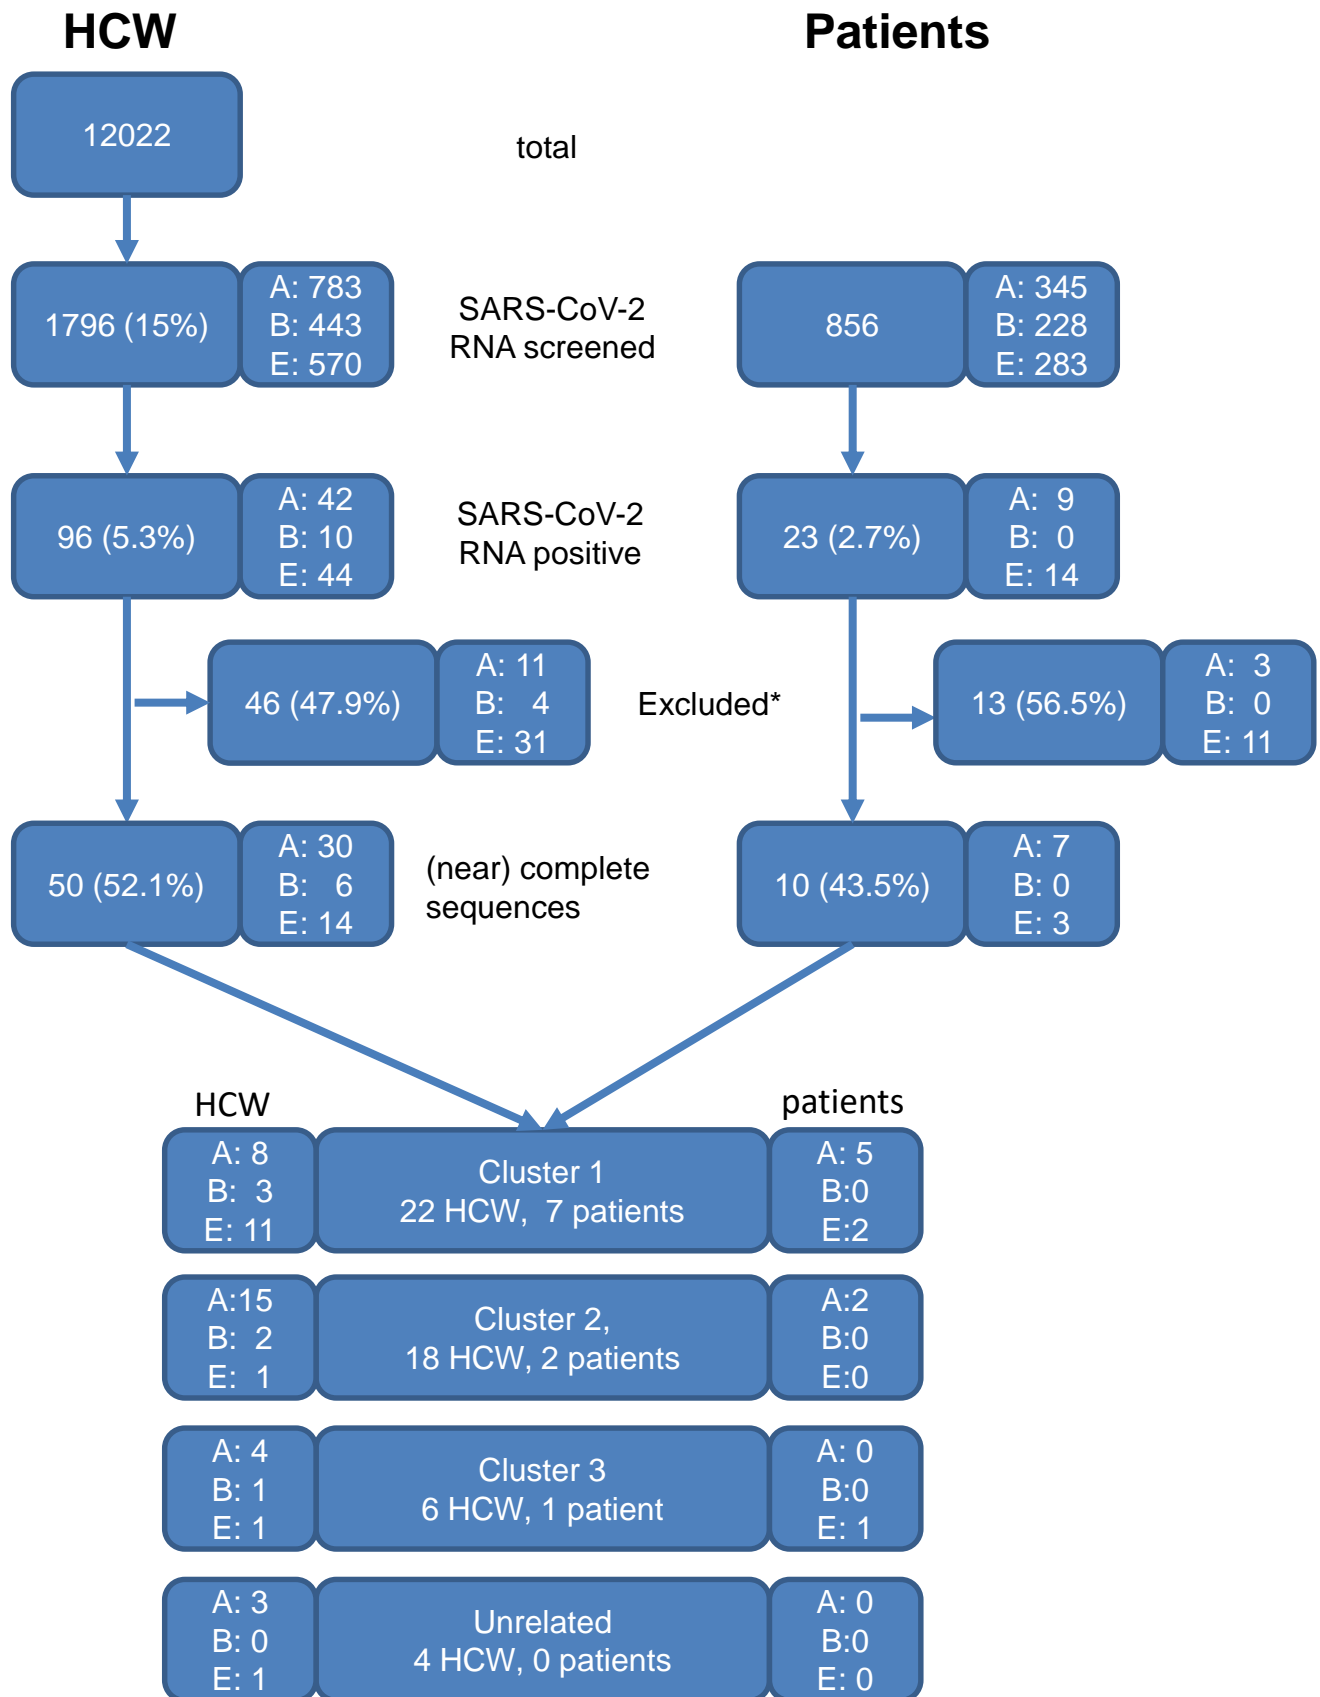

A=Amphia Hospital. B=Bravis Hospital, E=Elisabeth-TweeSteden Hospital. HCW=health-care worker.

\*Excluded because of low viral load (>Ct32), low sample volume, or unsuccessful sequencing.

***Supplemental figure: BEAST analysis of SARS-CoV-2 genomes obtained from GISAID on March 20, 2020***

Analysis shows contact and travel history of health-care workers. Mean root age 2019·907 (95% HPD interval 2019·834 to 2019·965) and mean clock rate  $1.425 \times 10^{-3}$  (95% HPD interval  $1.259 \times 10^{-3}$  to  $1.592 \times 10^{-3}$ ). SARS-CoV-2=severe acute respiratory syndrome coronavirus 2. GISAID=Global Initiative on Sharing All Influenza Data. HPD=highest posterior density.

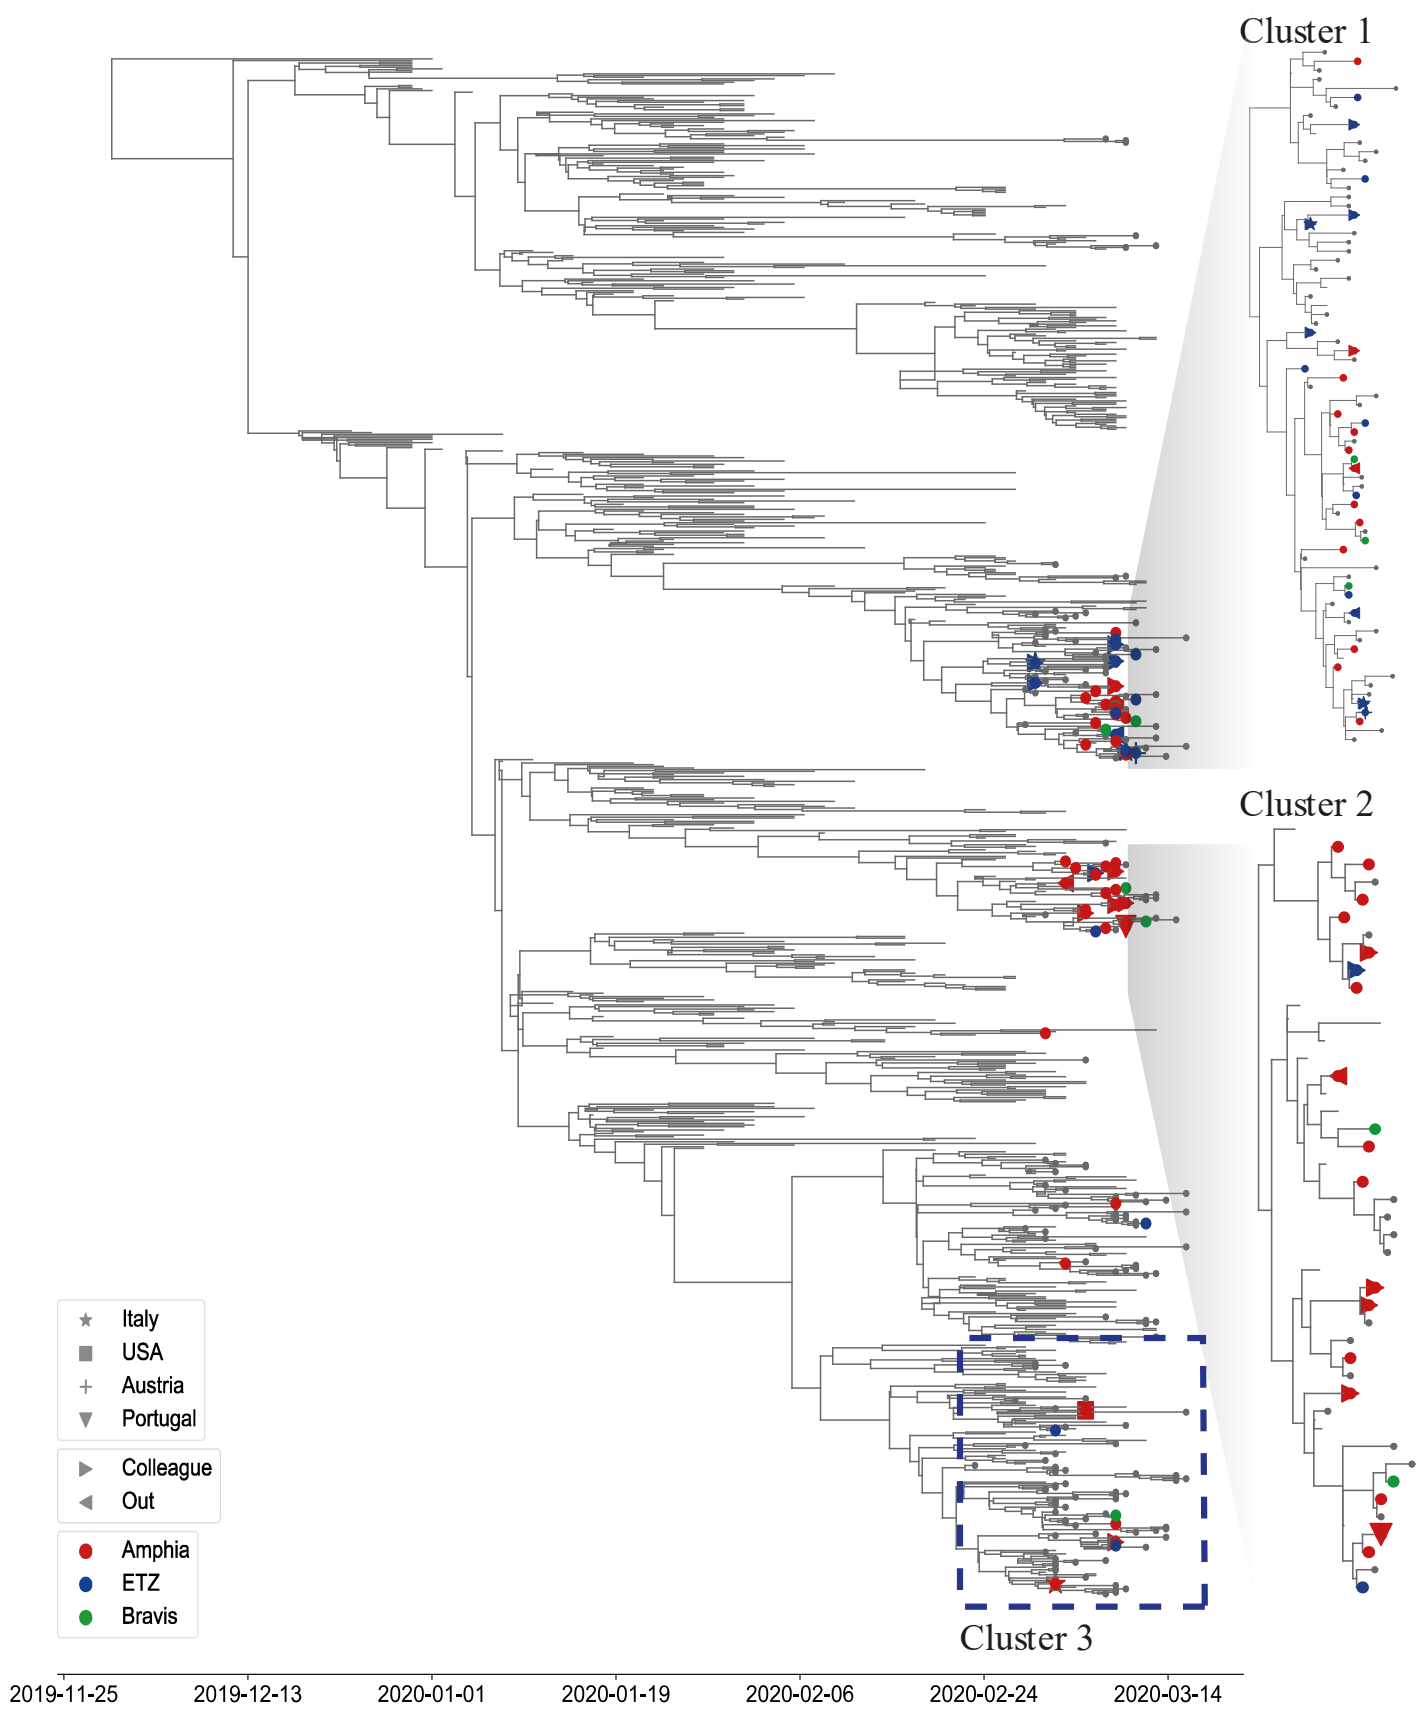



TAB1

We gratefully acknowledge the authors, originating and submitting laboratories of the sequences from GISAID's EpiFlu™ Database on which this research is based. The list is detailed below. All submitters of data may be contacted directly via [www.gisaid.org](http://www.gisaid.org)

| Accession ID   | Virus name                       | Location                            | Collection date | Originating lab                                                                                     | Submitting lab                                                                                                                          | Authors                                                                                                                                                                                                                                                                                                                                                                                                |
|----------------|----------------------------------|-------------------------------------|-----------------|-----------------------------------------------------------------------------------------------------|-----------------------------------------------------------------------------------------------------------------------------------------|--------------------------------------------------------------------------------------------------------------------------------------------------------------------------------------------------------------------------------------------------------------------------------------------------------------------------------------------------------------------------------------------------------|
| EPI_ISL_402119 | hCoV-19/Wuhan/IVDC-HB-01/2019    | Asia / China / Hubei / Wuhan        | 2019-12-30      | National Institute for Viral Disease Control and Prevention, China CDC                              | National Institute for Viral Disease Control and Prevention, China CDC                                                                  | Wenjie Tan, Xiang Zhao, Wenling Wang, Xuejun Ma, Yongzhong Jiang, Roujian Lu, Ji Wang, Weimin Zhou, Peihua Niu, Peipei Liu, Faxian Zhan, Weifeng Shi, Baoying Huang, Jun Liu, Li Zhao, Yao Meng, Xiaozhou He, Fei Ye, Na Zhu, Yang Li, Jing Chen, Wenbo Xu, George F. Gao, Guizhen Wu                                                                                                                  |
| EPI_ISL_402120 | hCoV-19/Wuhan/IVDC-HB-04/2020    | Asia / China / Hubei / Wuhan        | 2020-01-01      | National Institute for Viral Disease Control and Prevention, China CDC                              | National Institute for Viral Disease Control and Prevention, China CDC                                                                  | Wenjie Tan, Xiang Zhao, Wenling Wang, Xuejun Ma, Yongzhong Jiang, Roujian Lu, Ji Wang, Weimin Zhou, Peihua Niu, Peipei Liu, Faxian Zhan, Weifeng Shi, Baoying Huang, Jun Liu, Li Zhao, Yao Meng, Xiaozhou He, Fei Ye, Na Zhu, Yang Li, Jing Chen, Wenbo Xu, George F. Gao, Guizhen Wu                                                                                                                  |
| EPI_ISL_402121 | hCoV-19/Wuhan/IVDC-HB-05/2019    | Asia / China / Hubei / Wuhan        | 2019-12-30      | National Institute for Viral Disease Control and Prevention, China CDC                              | National Institute for Viral Disease Control and Prevention, China CDC                                                                  | Wenjie Tan, Xuejun Ma, Xiang Zhao, Wenling Wang, Yongzhong Jiang, Roujian Lu, Ji Wang, Peihua Niu, Weimin Zhou, Faxian Zhan, Weifeng Shi, Baoying Huang, Jun Liu, Li Zhao, Yao Meng, Fei Ye, Na Zhu, Xiaozhou He, Peipei Liu, Yang Li, Jing Chen, Wenbo Xu, George F. Gao, Guizhen Wu                                                                                                                  |
| EPI_ISL_402123 | hCoV-19/Wuhan/IPBCAMS-WH-01/2019 | Asia / China / Hubei / Wuhan        | 2019-12-24      | Institute of Pathogen Biology, Chinese Academy of Medical Sciences & Peking Union Medical College   | National Institute for Viral Disease Control and Prevention, China CDC                                                                  | Lili Ren, Jianwei Wang, Qi Jin, Zichun Xiang, Zhiqiang Wu, Chao Wu, Yiwei Liu, Peng Zhou, Xing-Lou Yang, Ding-Yu Zhang, Lei Zhang, Yan Zhu, Hao-Rui Si, Zhengli Shi                                                                                                                                                                                                                                    |
| EPI_ISL_402124 | hCoV-19/Wuhan/WIV04/2019         | Asia / China / Hubei / Wuhan        | 2019-12-30      | Wuhan Jinyintan Hospital                                                                            | Wuhan Institute of Virology, Chinese Academy of Sciences                                                                                | Zhang, Y.-Z., Wu, F., Chen, Y.-M., Pei, Y.-Y., Xu, L., Wang, W., Zhao, S., Yu, B., Hu, Y., Tao, Z.-W., Song, Z.-G., Tian, J.-H., Zhang, Y.-L., Liu, Y., Zheng, J.-J., Dai, F.-H., Wang, Q.-M., She, J.-L. and Zhu, T.-Y.                                                                                                                                                                               |
| EPI_ISL_402125 | hCoV-19/Wuhan-Hu-1/2019          | Asia / China                        | 2019-12-31      | unknown                                                                                             | National Institute for Communicable Disease Control and Prevention (ICDC) Chinese Center for Disease Control and Prevention (China CDC) |                                                                                                                                                                                                                                                                                                                                                                                                        |
| EPI_ISL_402126 | hCoV-19/Kanagawa/1/2020          | Asia / Japan / Kanagawa             | 2020-01-14      | Dept. of Virology III, National Institute of Infectious Diseases                                    | Dept. of Virology III, National Institute of Infectious Diseases                                                                        | Naganori Nao, Kazuya Shirato, Shutoku Matsuyama, Makoto Takeda                                                                                                                                                                                                                                                                                                                                         |
| EPI_ISL_402127 | hCoV-19/Wuhan/WIV02/2019         | Asia / China / Hubei / Wuhan        | 2019-12-30      | Wuhan Jinyintan Hospital                                                                            | Wuhan Institute of Virology, Chinese Academy of Sciences                                                                                | Peng Zhou, Xing-Lou Yang, Ding-Yu Zhang, Lei Zhang, Yan Zhu, Hao-Rui Si, Zhengli Shi                                                                                                                                                                                                                                                                                                                   |
| EPI_ISL_402128 | hCoV-19/Wuhan/WIV05/2019         | Asia / China / Hubei / Wuhan        | 2019-12-30      | Wuhan Jinyintan Hospital                                                                            | Wuhan Institute of Virology, Chinese Academy of Sciences                                                                                | Peng Zhou, Xing-Lou Yang, Ding-Yu Zhang, Lei Zhang, Yan Zhu, Hao-Rui Si, Zhengli Shi                                                                                                                                                                                                                                                                                                                   |
| EPI_ISL_402129 | hCoV-19/Wuhan/WIV06/2019         | Asia / China / Hubei / Wuhan        | 2019-12-30      | Wuhan Jinyintan Hospital                                                                            | Wuhan Institute of Virology, Chinese Academy of Sciences                                                                                | Peng Zhou, Xing-Lou Yang, Ding-Yu Zhang, Lei Zhang, Yan Zhu, Hao-Rui Si, Zhengli Shi                                                                                                                                                                                                                                                                                                                   |
| EPI_ISL_402130 | hCoV-19/Wuhan/WIV07/2019         | Asia / China / Hubei / Wuhan        | 2019-12-30      | Wuhan Jinyintan Hospital                                                                            | Wuhan Institute of Virology, Chinese Academy of Sciences                                                                                | Peng Zhou, Xing-Lou Yang, Ding-Yu Zhang, Lei Zhang, Yan Zhu, Hao-Rui Si, Zhengli Shi                                                                                                                                                                                                                                                                                                                   |
| EPI_ISL_402131 | hCoV-19/bat/Yunnan/RaTG13/2013   | Asia / China / Yunnan / Pu'er       | 2013-07-24      | Wuhan Institute of Virology, Chinese Academy of Sciences                                            | Wuhan Institute of Virology, Chinese Academy of Sciences                                                                                | Yan Zhu, Ping Yu, Bei Li, Ben Hu, Hao-Rui Si, Xing-Lou Yang, Peng Zhou, Zheng-Li Shi                                                                                                                                                                                                                                                                                                                   |
| EPI_ISL_402132 | hCoV-19/Wuhan/HBCCDC-HB-01/2019  | Asia / China / Hubei / Wuhan        | 2019-12-30      | Wuhan Jinyintan Hospital                                                                            | Hubei Provincial Center for Disease Control and Prevention                                                                              | Bin Fang, Xiang Li, Xiao Yu, Linlin Liu, Bo Yang, Faxian Zhan, Guojun Ye, Xixiang Huo, Junqiang Xu, Bo Yu, Kun Cai, Jing Li, Yongzhong Jiang.                                                                                                                                                                                                                                                          |
| EPI_ISL_403928 | hCoV-19/Wuhan/IPBCAMS-WH-05/2020 | Asia / China / Hubei / Wuhan        | 2020-01-01      | Institute of Pathogen Biology, Chinese Academy of Medical Sciences & Peking Union Medical College   | Institute of Pathogen Biology, Chinese Academy of Medical Sciences & Peking Union Medical College                                       | Lili Ren, Jianwei Wang, Qi Jin, Zichun Xiang, Zhiqiang Wu, Chao Wu, Yiwei Liu                                                                                                                                                                                                                                                                                                                          |
| EPI_ISL_403929 | hCoV-19/Wuhan/IPBCAMS-WH-04/2019 | Asia / China / Hubei / Wuhan        | 2019-12-30      | Institute of Pathogen Biology, Chinese Academy of Medical Sciences & Peking Union Medical College   | Institute of Pathogen Biology, Chinese Academy of Medical Sciences & Peking Union Medical College                                       | Lili Ren, Jianwei Wang, Qi Jin, Zichun Xiang, Zhiqiang Wu, Chao Wu, Yiwei Liu                                                                                                                                                                                                                                                                                                                          |
| EPI_ISL_403930 | hCoV-19/Wuhan/IPBCAMS-WH-03/2019 | Asia / China / Hubei / Wuhan        | 2019-12-30      | Institute of Pathogen Biology, Chinese Academy of Medical Sciences & Peking Union Medical College   | Institute of Pathogen Biology, Chinese Academy of Medical Sciences & Peking Union Medical College                                       | Lili Ren, Jianwei Wang, Qi Jin, Zichun Xiang, Zhiqiang Wu, Chao Wu, Yiwei Liu                                                                                                                                                                                                                                                                                                                          |
| EPI_ISL_403931 | hCoV-19/Wuhan/IPBCAMS-WH-02/2019 | Asia / China / Hubei / Wuhan        | 2019-12-30      | Institute of Pathogen Biology, Chinese Academy of Medical Sciences & Peking Union Medical College   | Institute of Pathogen Biology, Chinese Academy of Medical Sciences & Peking Union Medical College                                       | Lili Ren, Jianwei Wang, Qi Jin, Zichun Xiang, Zhiqiang Wu, Chao Wu, Yiwei Liu                                                                                                                                                                                                                                                                                                                          |
| EPI_ISL_403932 | hCoV-19/Guangdong/20SF012/2020   | Asia / China / Guangdong / Shenzhen | 2020-01-14      | Guangdong Provincial Center for Diseases Control and Prevention; Guangdong Provincial Public Health | Department of Microbiology, Guangdong Provincial Center for Diseases Control and Prevention                                             | Min Kang, Jie Wu, Jing Lu, Tao Liu, Baisheng Li, Shujiang Mei, Feng Ruan, Lifeng Lin, Changwen Ke, Haojie Zhong, Yingtao Zhang, Lirong Zou, Xuguang Chen, Qi Zhu, Jianpeng Xiao, Jianxiang Geng, Zhe Liu, Jianxiang Hu, Weilin Zeng, Xing Li, Yuhuang Liao, Xiujuan Tang, Songjian Xiao, Ying Wang, Yingchao Song, Xue Zhuang, Lijun Liang, Guanhao He, Huihong Deng, Tie Song, Jianfeng He, Wenjun Ma |
| EPI_ISL_403933 | hCoV-19/Guangdong/20SF013/2020   | Asia / China / Guangdong / Shenzhen | 2020-01-15      | Guangdong Provincial Center for Diseases Control and Prevention; Guangdong Provincial Public Health | Department of Microbiology, Guangdong Provincial Center for Diseases Control and Prevention                                             | Min Kang, Jie Wu, Jing Lu, Tao Liu, Baisheng Li, Shujiang Mei, Feng Ruan, Lifeng Lin, Changwen Ke, Haojie Zhong, Yingtao Zhang, Lirong Zou, Xuguang Chen, Qi Zhu, Jianpeng Xiao, Jianxiang Geng, Zhe Liu, Jianxiang Hu, Weilin Zeng, Xing Li, Yuhuang Liao, Xiujuan Tang, Songjian Xiao, Ying Wang, Yingchao Song, Xue Zhuang, Lijun Liang, Guanhao He, Huihong Deng, Tie Song, Jianfeng He, Wenjun Ma |
| EPI_ISL_403934 | hCoV-19/Guangdong/20SF014/2020   | Asia / China / Guangdong / Shenzhen | 2020-01-15      | Guangdong Provincial Center for Diseases Control and Prevention; Guangdong Provincial Public Health | Department of Microbiology, Guangdong Provincial Center for Diseases Control and Prevention                                             | Min Kang, Jie Wu, Jing Lu, Tao Liu, Baisheng Li, Shujiang Mei, Feng Ruan, Lifeng Lin, Changwen Ke, Haojie Zhong, Yingtao Zhang, Lirong Zou, Xuguang Chen, Qi Zhu, Jianpeng Xiao, Jianxiang Geng, Zhe Liu, Jianxiang Hu, Weilin Zeng, Xing Li, Yuhuang Liao, Xiujuan Tang, Songjian Xiao, Ying Wang, Yingchao Song, Xue Zhuang, Lijun Liang, Guanhao He, Huihong Deng, Tie Song, Jianfeng He, Wenjun Ma |

|                |                                  |                                                  |            |                                                                                                     |                                                                                                                                                                                                                     |                                                                                                                                                                                                                                                                                                                                                                                                         |
|----------------|----------------------------------|--------------------------------------------------|------------|-----------------------------------------------------------------------------------------------------|---------------------------------------------------------------------------------------------------------------------------------------------------------------------------------------------------------------------|---------------------------------------------------------------------------------------------------------------------------------------------------------------------------------------------------------------------------------------------------------------------------------------------------------------------------------------------------------------------------------------------------------|
| EPI_ISL_403935 | hCoV-19/Guangdong/20SF025/2020   | Asia / China / Guangdong / Shenzher              | 2020-01-15 | Guangdong Provincial Center for Diseases Control and Prevention; Guangdong Provincial Public Health | Department of Microbiology, Guangdong Provincial Center for Diseases Control and Prevention                                                                                                                         | Min Kang, Jie Wu, Jing Lu, Tao Liu, Baisheng Li, Shuijiang Mei, Feng Ruan, Lifeng Lin, Changwen Ke, Haojie Zhong, Yingtao Zhang, Lirong Zou, Xuguang Chen, Qi Zhu, Jianpeng Xiao, Jianxiang Geng, Zhe Liu, Jianxiong Hu, Weilin Zeng, Xing Li, Yuhuang Liao, Xiujuan Tang, Songjian Xiao, Ying Wang, Yingchao Song, Xue Zhuang, Lijun Liang, Guanhao He, Huihong Deng, Tie Song, Jianfeng He, Wenjun Ma |
| EPI_ISL_403936 | hCoV-19/Guangdong/20SF028/2020   | Asia / China / Guangdong / Zhuhai                | 2020-01-17 | Guangdong Provincial Center for Diseases Control and Prevention; Guangdong Provincial Public Health | Department of Microbiology, Guangdong Provincial Center for Diseases Control and Prevention                                                                                                                         | Min Kang, Jie Wu, Jing Lu, Tao Liu, Baisheng Li, Shuijiang Mei, Feng Ruan, Lifeng Lin, Changwen Ke, Haojie Zhong, Yingtao Zhang, Lirong Zou, Xuguang Chen, Qi Zhu, Jianpeng Xiao, Jianxiang Geng, Zhe Liu, Jianxiong Hu, Weilin Zeng, Xing Li, Yuhuang Liao, Xiujuan Tang, Songjian Xiao, Ying Wang, Yingchao Song, Xue Zhuang, Lijun Liang, Guanhao He, Huihong Deng, Tie Song, Jianfeng He, Wenjun Ma |
| EPI_ISL_403937 | hCoV-19/Guangdong/20SF040/2020   | Asia / China / Guangdong / Zhuhai                | 2020-01-18 | Guangdong Provincial Center for Diseases Control and Prevention; Guangdong Provincial Public Health | Department of Microbiology, Guangdong Provincial Center for Diseases Control and Prevention                                                                                                                         | Min Kang, Jie Wu, Jing Lu, Tao Liu, Baisheng Li, Shuijiang Mei, Feng Ruan, Lifeng Lin, Changwen Ke, Haojie Zhong, Yingtao Zhang, Lirong Zou, Xuguang Chen, Qi Zhu, Jianpeng Xiao, Jianxiang Geng, Zhe Liu, Jianxiong Hu, Weilin Zeng, Xing Li, Yuhuang Liao, Xiujuan Tang, Songjian Xiao, Ying Wang, Yingchao Song, Xue Zhuang, Lijun Liang, Guanhao He, Huihong Deng, Tie Song, Jianfeng He, Wenjun Ma |
| EPI_ISL_403962 | hCoV-19/Thailand/61/2020         | Asia / Thailand / Nonthaburi                     | 2020-01-08 | Bamrasnaradura Hospital                                                                             | 1. Department of Medical Sciences, Ministry of Public Health, Thailand 2. Thai Red Cross Emerging Infectious Diseases - Health Science Centre 3. Department of Disease Control, Ministry of Public Health, Thailand | Pilailuk,Okada; Siripapom,Phuygun; Thanutsapa,Thanadachakul; Supaporn,Wacharapluessadee; Sittiporn,Parmmen; Warawan,Wongboot; Sunthareeya,Waicharoen; Rome,Buathong; Malinee,Chittaganpitch; Nanthawan,Mekha                                                                                                                                                                                            |
| EPI_ISL_403963 | hCoV-19/Thailand/74/2020         | Asia / Thailand / Nonthaburi                     | 2020-01-13 | Bamrasnaradura Hospital                                                                             | 1. Department of Medical Sciences, Ministry of Public Health, Thailand 2. Thai Red Cross Emerging Infectious Diseases - Health Science Centre 3. Department of Disease Control, Ministry of Public Health, Thailand | Pilailuk,Okada; Siripapom,Phuygun; Thanutsapa,Thanadachakul; Supaporn,Wacharapluessadee; Sittiporn,Parmmen; Warawan,Wongboot; Sunthareeya,Waicharoen; Rome,Buathong; Malinee,Chittaganpitch; Nanthawan,Mekha                                                                                                                                                                                            |
| EPI_ISL_404227 | hCoV-19/Zhejiang/WZ-01/2020      | Asia / China / Zhejiang                          | 2020-01-16 | Zhejiang Provincial Center for Disease Control and Prevention                                       | Department of Microbiology, Zhejiang Provincial Center for Disease Control and Prevention                                                                                                                           | Yin Chen, Yanjun Zhang, Haiyan Mao, Junhang Pan, Xiuyu Lou, Yiyu Lu, Juying Yan, Hanping Zhu, Jian Gao, Yan Feng, Yi Sun, Hao Yan, Zhen Li, Yisheng Sun, Liming Gong, Qiong Ge, Wen Shi, Xinying Wang, Wenwu Yao, Zhangnv Yang, Fang Xu, Chen Chen, Enfu Chen, Zhen Wang, Zhiping Chen, Jianmin Jiang, Chonggao Hu                                                                                      |
| EPI_ISL_404228 | hCoV-19/Zhejiang/WZ-02/2020      | Asia / China / Zhejiang                          | 2020-01-17 | Zhejiang Provincial Center for Disease Control and Prevention                                       | Department of Microbiology, Zhejiang Provincial Center for Disease Control and Prevention                                                                                                                           | Yin Chen, Yanjun Zhang, Haiyan Mao, Junhang Pan, Xiuyu Lou, Yiyu Lu, Juying Yan, Hanping Zhu, Jian Gao, Yan Feng, Yi Sun, Hao Yan, Zhen Li, Yisheng Sun, Liming Gong, Qiong Ge, Wen Shi, Xinying Wang, Wenwu Yao, Zhangnv Yang, Fang Xu, Chen Chen, Enfu Chen, Zhen Wang, Zhiping Chen, Jianmin Jiang, Chonggao Hu                                                                                      |
| EPI_ISL_404253 | hCoV-19/USA/IL1/2020             | North America / USA / Illinois / Chicago         | 2020-01-21 | IL Department of Public Health Chicago Laboratory                                                   | Division of Viral Diseases, Centers for Diseases Control and Prevention                                                                                                                                             | Ying Tao, Krista Queen, Clinton R. Paden, Jing Zhang, Yan Li, Anna Uehara, Xiaoyan Lu, Brian Lynch, Senthil Kumar K. Sakthivel, Brett L. Whitaker, Shifaq Kamili, Lijuan Wang, Janna' R. Murray, Susan I. Gerber, Stephen Lindstrom, Suxiang Tong                                                                                                                                                       |
| EPI_ISL_404895 | hCoV-19/USA/WA1/2020             | North America / USA / Washington /               | 2020-01-19 | Providence Regional Medical Center                                                                  | Division of Viral Diseases, Centers for Disease Control and Prevention                                                                                                                                              | Queen,K., Tao,Y., Li,Y., Paden,C.R., Lu,X., Zhang,J., Gerber,S.I., Lindstrom,S., Tong,S.                                                                                                                                                                                                                                                                                                                |
| EPI_ISL_405839 | hCoV-19/Shenzhen/HKU-SZ-005/2020 | Asia / China / Guangdong / Shenzher              | 2020-01-11 | The University of Hong Kong - Shenzhen Hospital                                                     | Li Ka Shing Faculty of Medicine, The University of Hong Kong                                                                                                                                                        | Chan,J.F.-W., Yuan,S., Kok,K.H., To,K.K.-W., Chu,H., Yang,J., Xing,F., Liu,J., Yip,C.C.-Y., Poon,R.W.-S., Tsai,H.W., Lo,S.K.-F., Chan,K.H., Poon,V.K.-M., Chan,W.M., Ip,J.D., Cai,J.P., Cheng,V.C.-C., Chen,H., Hui,C.K.-M. and Yuen,K.Y.                                                                                                                                                               |
| EPI_ISL_406030 | hCoV-19/Shenzhen/HKU-SZ-002/2020 | Asia / China / Guangdong / Shenzher              | 2020-01-10 | The University of Hong Kong - Shenzhen Hospital                                                     | Li Ka Shing Faculty of Medicine, The University of Hong Kong                                                                                                                                                        | Chan,J.F.-W., Yuan,S., Kok,K.H., To,K.K.-W., Chu,H., Yang,J., Xing,F., Liu,J., Yip,C.C.-Y., Poon,R.W.-S., Tsai,H.W., Lo,S.K.-F., Chan,K.H., Poon,V.K.-M., Chan,W.M., Ip,J.D., Cai,J.P., Cheng,V.C.-C., Chen,H., Hui,C.K.-M. and Yuen,K.Y.                                                                                                                                                               |
| EPI_ISL_406031 | hCoV-19/Taiwan/2/2020            | Asia / Taiwan / Kaohsiung                        | 2020-01-23 | Centers for Disease Control, R.O.C. (Taiwan)                                                        | Centers for Disease Control, R.O.C. (Taiwan)                                                                                                                                                                        | Ji-Rong Yang, Yu-Chi Lin, Jung-Jung Mu, Ming-Tsan Liu, Shu-Ying Li                                                                                                                                                                                                                                                                                                                                      |
| EPI_ISL_406034 | hCoV-19/USA/CA1/2020             | North America / USA / California / Los Angeles   | 2020-01-23 | California Department of Public Health                                                              | Pathogen Discovery, Respiratory Viruses Branch, Division of Viral Diseases, Centers for Diseases Control and Prevention                                                                                             | Anna Uehara, Krista Queen, Ying Tao, Yan Li, Clinton R. Paden, Jing Zhang, Xiaoyan Lu, Brian Lynch, Senthil Kumar K. Sakthivel, Brett L. Whitaker, Shifaq Kamili, Lijuan Wang, Janna' R. Murray, Susan I. Gerber, Stephen Lindstrom, Suxiang Tong                                                                                                                                                       |
| EPI_ISL_406036 | hCoV-19/USA/CA2/2020             | North America / USA / California / Orange County | 2020-01-22 | California Department of Public Health                                                              | Pathogen Discovery, Respiratory Viruses Branch, Division of Viral Diseases, Centers for Diseases Control and Prevention                                                                                             | Anna Uehara, Krista Queen, Ying Tao, Yan Li, Clinton R. Paden, Jing Zhang, Xiaoyan Lu, Brian Lynch, Senthil Kumar K. Sakthivel, Brett L. Whitaker, Shifaq Kamili, Lijuan Wang, Janna' R. Murray, Susan I. Gerber, Stephen Lindstrom, Suxiang Tong                                                                                                                                                       |
| EPI_ISL_406223 | hCoV-19/USA/AZ1/2020             | North America / USA / Arizona / Phoenix          | 2020-01-22 | Arizona Department of Health Services                                                               | Pathogen Discovery, Respiratory Viruses Branch, Division of Viral Diseases, Centers for Disease Control and Prevention                                                                                              | Ying Tao, Clinton R. Paden, Krista Queen, Anna Uehara, Yan Li, Jing Zhang, Xiaoyan Lu, Brian Lynch, Senthil Kumar K. Sakthivel, Brett L. Whitaker, Shifaq Kamili, Lijuan Wang, Janna' R. Murray, Susan I. Gerber, Stephen Lindstrom, Suxiang Tong                                                                                                                                                       |
| EPI_ISL_406531 | hCoV-19/Guangdong/20SF174/2020   | Asia / China / Guangdong / Zhuhai                | 2020-01-22 | Guangdong Provincial Center for Diseases Control and Prevention; Guangdong Provincial Public Health | Guangdong Provincial Center for Disease Control and Prevention                                                                                                                                                      | Min Kang, Jie Wu, Jing Lu, Tao Liu, Baisheng Li, Shuijiang Mei, Feng Ruan, Lifeng Lin, Changwen Ke, Haojie Zhong, Yingtao Zhang, Lirong Zou, Xuguang Chen, Qi Zhu, Jianpeng Xiao, Jianxiang Geng, Zhe Liu, Jianxiong Hu, Weilin Zeng, Xing Li, Yuhuang Liao, Xiujuan Tang, Songjian Xiao, Ying Wang, Yingchao Song, Xue Zhuang, Lijun Liang, Guanhao He, Huihong Deng, Tie Song, Jianfeng He, Wenjun Ma |

|                |                                |                                         |            |                                                                                                                                                                                        |                                                                                                                                                                                                                            |                                                                                                                                                                                                                                                                                                                                                                                                        |
|----------------|--------------------------------|-----------------------------------------|------------|----------------------------------------------------------------------------------------------------------------------------------------------------------------------------------------|----------------------------------------------------------------------------------------------------------------------------------------------------------------------------------------------------------------------------|--------------------------------------------------------------------------------------------------------------------------------------------------------------------------------------------------------------------------------------------------------------------------------------------------------------------------------------------------------------------------------------------------------|
| EPI_ISL_406533 | hCoV-19/Guangzhou/20SF206/2020 | Asia / China / Guangdong / Guangzh      | 2020-01-22 | Guangdong Provincial Center for Diseases Control and Prevention; Guangdong Provincial Public Health                                                                                    | Guangdong Provincial Center for Diseases Control and Prevention                                                                                                                                                            | Min Kang, Jie Wu, Jing Lu, Tao Liu, Baisheng Li, Shujiang Mei, Feng Ruan, Lifeng Lin, Changwen Ke, Haojie Zhong, Yingtao Zhang, Lirong Zou, Xuguang Chen, Qi Zhu, Jianpeng Xiao, Jianxiang Geng, Zhe Liu, Jianxiang Hu, Weilin Zeng, Xing Li, Yuhuang Liao, Xiujuan Tang, Songjian Xiao, Ying Wang, Yingchao Song, Xue Zhuang, Lijun Liang, Guanhao He, Huihong Deng, Tie Song, Jianfeng He, Wenjun Ma |
| EPI_ISL_406534 | hCoV-19/Foshan/20SF207/2020    | Asia / China / Guangdong / Foshan       | 2020-01-22 | Guangdong Provincial Center for Diseases Control and Prevention; Guangdong Provincial Public Health                                                                                    | Guangdong Provincial Center for Diseases Control and Prevention                                                                                                                                                            | Min Kang, Jie Wu, Jing Lu, Tao Liu, Baisheng Li, Shujiang Mei, Feng Ruan, Lifeng Lin, Changwen Ke, Haojie Zhong, Yingtao Zhang, Lirong Zou, Xuguang Chen, Qi Zhu, Jianpeng Xiao, Jianxiang Geng, Zhe Liu, Jianxiang Hu, Weilin Zeng, Xing Li, Yuhuang Liao, Xiujuan Tang, Songjian Xiao, Ying Wang, Yingchao Song, Xue Zhuang, Lijun Liang, Guanhao He, Huihong Deng, Tie Song, Jianfeng He, Wenjun Ma |
| EPI_ISL_406535 | hCoV-19/Foshan/20SF210/2020    | Asia / China / Guangdong / Foshan       | 2020-01-22 | Guangdong Provincial Center for Diseases Control and Prevention; Guangdong Provincial Public Health                                                                                    | Guangdong Provincial Center for Diseases Control and Prevention                                                                                                                                                            | Min Kang, Jie Wu, Jing Lu, Tao Liu, Baisheng Li, Shujiang Mei, Feng Ruan, Lifeng Lin, Changwen Ke, Haojie Zhong, Yingtao Zhang, Lirong Zou, Xuguang Chen, Qi Zhu, Jianpeng Xiao, Jianxiang Geng, Zhe Liu, Jianxiang Hu, Weilin Zeng, Xing Li, Yuhuang Liao, Xiujuan Tang, Songjian Xiao, Ying Wang, Yingchao Song, Xue Zhuang, Lijun Liang, Guanhao He, Huihong Deng, Tie Song, Jianfeng He, Wenjun Ma |
| EPI_ISL_406536 | hCoV-19/Foshan/20SF211/2020    | Asia / China / Guangdong / Foshan       | 2020-01-22 | Guangdong Provincial Center for Diseases Control and Prevention; Guangdong Provincial Public Health                                                                                    | Guangdong Provincial Center for Diseases Control and Prevention                                                                                                                                                            | Min Kang, Jie Wu, Jing Lu, Tao Liu, Baisheng Li, Shujiang Mei, Feng Ruan, Lifeng Lin, Changwen Ke, Haojie Zhong, Yingtao Zhang, Lirong Zou, Xuguang Chen, Qi Zhu, Jianpeng Xiao, Jianxiang Geng, Zhe Liu, Jianxiang Hu, Weilin Zeng, Xing Li, Yuhuang Liao, Xiujuan Tang, Songjian Xiao, Ying Wang, Yingchao Song, Xue Zhuang, Lijun Liang, Guanhao He, Huihong Deng, Tie Song, Jianfeng He, Wenjun Ma |
| EPI_ISL_406538 | hCoV-19/Guangdong/20SF201/2020 | Asia / China / Guangdong                | 2020-01-23 | Guangdong Provincial Center for Diseases Control and Prevention; Guangdong Provincial Institute of Public Health                                                                       | Guangdong Provincial Center for Diseases Control and Prevention                                                                                                                                                            | Min Kang, Jie Wu, Jing Lu, Tao Liu, Baisheng Li, Shujiang Mei, Feng Ruan, Lifeng Lin, Changwen Ke, Haojie Zhong, Yingtao Zhang, Lirong Zou, Xuguang Chen, Qi Zhu, Jianpeng Xiao, Jianxiang Geng, Zhe Liu, Jianxiang Hu, Weilin Zeng, Xing Li, Yuhuang Liao, Xiujuan Tang, Songjian Xiao, Ying Wang, Yingchao Song, Xue Zhuang, Lijun Liang, Guanhao He, Huihong Deng, Tie Song, Jianfeng He, Wenjun Ma |
| EPI_ISL_406592 | hCoV-19/Shenzhen/SZTH-001/2020 | Asia / China / Guangdong / Shenzhen     | 2020-01-13 | Shenzhen Third People's Hospital<br>Shenzhen Key Laboratory of Pathogen and Immunity,<br>National Clinical Research Center for Infectious Disease,<br>Shenzhen Third People's Hospital | Shenzhen Key Laboratory of Pathogen and Immunity,<br>National Clinical Research Center for Infectious Disease,<br>Shenzhen Third People's Hospital                                                                         | Yang Yang, Chenguang Shen, Li Xing, Zhixiang Xu, Haixia Zheng, Yingxia Liu                                                                                                                                                                                                                                                                                                                             |
| EPI_ISL_406593 | hCoV-19/Shenzhen/SZTH-002/2020 | Asia / China / Guangdong / Shenzhen     | 2020-01-13 | Shenzhen Key Laboratory of Pathogen and Immunity,<br>National Clinical Research Center for Infectious Disease,<br>Shenzhen Third People's Hospital                                     | Shenzhen Key Laboratory of Pathogen and Immunity,<br>National Clinical Research Center for Infectious Disease,<br>Shenzhen Third People's Hospital                                                                         | Yang Yang, Chenguang Shen, Li Xing, Zhixiang Xu, Haixia Zheng, Yingxia Liu                                                                                                                                                                                                                                                                                                                             |
| EPI_ISL_406594 | hCoV-19/Shenzhen/SZTH-003/2020 | Asia / China / Guangdong / Shenzhen     | 2020-01-16 | Shenzhen Key Laboratory of Pathogen and Immunity,<br>National Clinical Research Center for Infectious Disease,<br>Shenzhen Third People's Hospital                                     | Shenzhen Key Laboratory of Pathogen and Immunity,<br>National Clinical Research Center for Infectious Disease,<br>Shenzhen Third People's Hospital                                                                         | Yang Yang, Chenguang Shen, Li Xing, Zhixiang Xu, Haixia Zheng, Yingxia Liu                                                                                                                                                                                                                                                                                                                             |
| EPI_ISL_406595 | hCoV-19/Shenzhen/SZTH-004/2020 | Asia / China / Guangdong / Shenzhen     | 2020-01-16 | Shenzhen Key Laboratory of Pathogen and Immunity,<br>National Clinical Research Center for Infectious Disease,<br>Shenzhen Third People's Hospital                                     | Shenzhen Key Laboratory of Pathogen and Immunity,<br>National Clinical Research Center for Infectious Disease,<br>Shenzhen Third People's Hospital                                                                         | Yang Yang, Chenguang Shen, Li Xing, Zhixiang Xu, Haixia Zheng, Yingxia Liu                                                                                                                                                                                                                                                                                                                             |
| EPI_ISL_406596 | hCoV-19/France/IDF0372/2020    | Europe / France / Ile-de-France / Paris | 2020-01-23 | Department of Infectious and Tropical Diseases, Bichat Claude Bernard Hospital, Paris                                                                                                  | National Reference Center for Viruses of Respiratory Infections, Institut Pasteur, Paris                                                                                                                                   | Mélanie Albert, Marion Barbet, Sylvie Behillil, Méline Bizard, Angela Brisebarre, Flora Donati, Vincent Enouf, Maud Vanpeene, Sylvie van der Werf, Yazdan Yazdanpanah, Xavier Lescure.                                                                                                                                                                                                                 |
| EPI_ISL_406597 | hCoV-19/France/IDF0373/2020    | Europe / France / Ile-de-France / Paris | 2020-01-23 | Department of Infectious and Tropical Diseases, Bichat Claude Bernard Hospital, Paris                                                                                                  | National Reference Center for Viruses of Respiratory Infections, Institut Pasteur, Paris                                                                                                                                   | Mélanie Albert, Marion Barbet, Sylvie Behillil, Méline Bizard, Angela Brisebarre, Flora Donati, Vincent Enouf, Maud Vanpeene, Sylvie van der Werf, Yazdan Yazdanpanah, Xavier Lescure.                                                                                                                                                                                                                 |
| EPI_ISL_406716 | hCoV-19/Wuhan/WHU01/2020       | Asia / China / Hubei / Wuhan            | 2020-01-02 | unknown                                                                                                                                                                                | State Key Laboratory of Virology, Wuhan University                                                                                                                                                                         | Chen,L., Liu,W., Zhang,Q., Xu,K., Ye,G., Wu,W., Sun,Z., Liu,F., Wu,K., Mei,Y., Zhang,W., Chen,Y., Li,Y., Shi,M., Lan,K. and Liu,Y.                                                                                                                                                                                                                                                                     |
| EPI_ISL_406717 | hCoV-19/Wuhan/WHU02/2020       | Asia / China / Hubei / Wuhan            | 2020-01-02 | unknown                                                                                                                                                                                | State Key Laboratory of Virology, Wuhan University                                                                                                                                                                         | Chen,L., Liu,W., Zhang,Q., Xu,K., Ye,G., Wu,W., Sun,Z., Liu,F., Wu,K., Mei,Y., Zhang,W., Chen,Y., Li,Y., Shi,M., Lan,K. and Liu,Y.                                                                                                                                                                                                                                                                     |
| EPI_ISL_406798 | hCoV-19/Wuhan/WH01/2019        | Asia / China / Hubei / Wuhan            | 2019-12-26 | General Hospital of Central Theater Command of People's Liberation Army of China                                                                                                       | General Hospital of Central Theater Command of People's Liberation Army of China                                                                                                                                           | Weijun Chen, Yuhai Bi, Weifeng Shi and Zhenhong Hu                                                                                                                                                                                                                                                                                                                                                     |
| EPI_ISL_406799 | hCoV-19/Wuhan/WH02/2019        | Asia / China / Wuhan                    | 2019-12-31 | General Hospital of Central Theater Command of People's Liberation Army of China                                                                                                       | BGI & Institute of Microbiology, Chinese Academy of Sciences & Shandong First Medical University & Shandong Academy of Medical Sciences & General Hospital of Central Theater Command of People's Liberation Army of China | Weijun Chen, Yuhai Bi, Weifeng Shi and Zhenhong Hu                                                                                                                                                                                                                                                                                                                                                     |
| EPI_ISL_406800 | hCoV-19/Wuhan/WH03/2020        | Asia / China / Hubei / Wuhan            | 2020-01-01 | General Hospital of Central Theater Command of People's Liberation Army of China                                                                                                       | BGI & Institute of Microbiology, Chinese Academy of Sciences & Shandong First Medical University & Shandong Academy of Medical Sciences & General Hospital of Central Theater Command of People's Liberation Army of China | Weijun Chen, Yuhai Bi, Weifeng Shi and Zhenhong Hu                                                                                                                                                                                                                                                                                                                                                     |
| EPI_ISL_406801 | hCoV-19/Wuhan/WH04/2020        | Asia / China / Hubei / Wuhan            | 2020-01-05 | General Hospital of Central Theater Command of People's Liberation Army of China                                                                                                       | BGI & Institute of Microbiology, Chinese Academy of Sciences & Shandong First Medical University & Shandong Academy of Medical Sciences & General Hospital of Central Theater Command of People's Liberation Army of China | Weijun Chen, Yuhai Bi, Weifeng Shi and Zhenhong Hu                                                                                                                                                                                                                                                                                                                                                     |

|                |                                 |                                          |            |                                                                                                              |                                                                                                                                                                        |                                                                                                                                                                                                                                                                                                                                                                                              |
|----------------|---------------------------------|------------------------------------------|------------|--------------------------------------------------------------------------------------------------------------|------------------------------------------------------------------------------------------------------------------------------------------------------------------------|----------------------------------------------------------------------------------------------------------------------------------------------------------------------------------------------------------------------------------------------------------------------------------------------------------------------------------------------------------------------------------------------|
| EPI_ISL_406844 | hCoV-19/Australia/VIC01/2020    | Oceania / Australia / Victoria / Clayton | 2020-01-25 | Monash Medical Centre                                                                                        | Collaboration between the University of Melbourne at The Peter Doherty Institute for Infection and Immunity, and the Victorian Infectious Disease Reference Laboratory | Caly L., Seemann T., Schultz M., Druce J. and Tairao G                                                                                                                                                                                                                                                                                                                                       |
| EPI_ISL_406862 | hCoV-19/Germany/BavPat1/2020    | Europe / Germany / Bavaria / Munich      | 2020-01-28 | Charité Universitätsmedizin Berlin, Institute of Virology; Institut für Mikrobiologie der Bundeswehr, Munich | Charité Universitätsmedizin Berlin, Institute of Virology                                                                                                              | Victor M Corman, Julia Schneider, Talitha Veith, Barbara Mühlemann, Markus Antwerpen, Christian Drosten, Roman Wölfel                                                                                                                                                                                                                                                                        |
| EPI_ISL_406959 | hCoV-19/Italy/INMI1/2020        | Europe / Italy / Rome                    | 2020-01    | unknown                                                                                                      | Virology Laboratory, INMI L. Spallanzani                                                                                                                               | Capobianchi M.R., Carletti F., Lalle E., Bordini L., Marsella P., Colavita F., Matusali G., Nicastri E., Ippolito G. and Castilletti C.                                                                                                                                                                                                                                                      |
| EPI_ISL_406960 | hCoV-19/Italy/INMI2/2020        | Europe / Italy / Rome                    | 2020-01    | unknown                                                                                                      | Virology Laboratory, INMI L. Spallanzani                                                                                                                               | Capobianchi M.R., Lalle E., Carletti F., Bordini L., Marsella P., Colavita F., Matusali G., Nicastri E., Ippolito G. and Castilletti C.                                                                                                                                                                                                                                                      |
| EPI_ISL_406970 | hCoV-19/Hangzhou/HZ-1/2020      | Asia / China / Zhejiang / Hangzhou       | 2020-01-20 | Hangzhou Center for Disease and Control Microbiology Lab                                                     | Hangzhou Center for Disease and Control Microbiology Lab                                                                                                               | Yu Hua, Wang Haoqiu, Li Jun, Yu Xinfeng                                                                                                                                                                                                                                                                                                                                                      |
| EPI_ISL_406973 | hCoV-19/Singapore/1/2020        | Asia / Singapore                         | 2020-01-23 | Singapore General Hospital                                                                                   | National Public Health Laboratory                                                                                                                                      | Mak, TM; Octavia S; Chavatte JM; Zhou, ZY; Cui, L; Lin, RTP                                                                                                                                                                                                                                                                                                                                  |
| EPI_ISL_407071 | hCoV-19/England/01/2020         | Europe / United Kingdom / England        | 2020-01-29 | Respiratory Virus Unit, Microbiology Services Colindale, Public Health England                               | Respiratory Virus Unit, Microbiology Services Colindale, Public Health England                                                                                         | Monica Galiano, Shahjahan Miah, Richard Myers, Angie Lackenby, Omolola Akinbami, Tiina Talts, Leena Bhaw, Kirstin Edwards, Jonathan Hubb, Joanna Ellis, Maria Zambon                                                                                                                                                                                                                         |
| EPI_ISL_407073 | hCoV-19/England/02/2020         | Europe / United Kingdom / England        | 2020-01-29 | Respiratory Virus Unit, Microbiology Services Colindale, Public Health England                               | Respiratory Virus Unit, Microbiology Services Colindale, Public Health England                                                                                         | Monica Galiano, Shahjahan Miah, Richard Myers, Angie Lackenby, Omolola Akinbami, Tiina Talts, Leena Bhaw, Kirstin Edwards, Jonathan Hubb, Joanna Ellis, Maria Zambon.                                                                                                                                                                                                                        |
| EPI_ISL_407079 | hCoV-19/Finland/1/2020          | Europe / Finland / Lapland               | 2020-01-29 | Lapland Central Hospital                                                                                     | Department of Virology, University of Helsinki and Helsinki University Hospital, Helsinki, Finland                                                                     | Teemu Smura, Suvi Kuivanen, Hannimari Kallio-Kokko, Olli Vapalahti                                                                                                                                                                                                                                                                                                                           |
| EPI_ISL_407084 | hCoV-19/Japan/AI-1-004/2020     | Asia / Japan / Aichi                     | 2020-01-25 | Department of Virology III, National Institute of Infectious Diseases                                        | Pathogen Genomics Center, National Institute of Infectious Diseases                                                                                                    | Tsuyoshi Sekizuka, Shutoku Matsuyama, Naganori Nao, Kazuya Shirato, Shingi Watanabe, Makoto Takeda, Makoto Kuroda                                                                                                                                                                                                                                                                            |
| EPI_ISL_407214 | hCoV-19/USA/WA1-A12/2020        | North America / USA / Washington         | 2020-01-25 | WA State Department of Health                                                                                | Pathogen Discovery, Respiratory Viruses Branch, Division of Viral Diseases, Centers for Diseases Control and Prevention                                                | Krista Queen, Azaibi Tamin, Jennifer Harcourt, Ying Tao, Clinton R. Paden, Jing Zhang, Yan Li, Anna Uehara, Xiaoyan Lu, Shifaq Kamili, Rashi Gautam, Haibin Wang, Janna' R. Murray, Susan I. Gerber, Stephen Lindstrom, Natalie Thornburg, Suxiang Tong                                                                                                                                      |
| EPI_ISL_407215 | hCoV-19/USA/WA1-F6/2020         | North America / USA / Washington         | 2020-01-25 | Washington State Department of Health                                                                        | Pathogen Discovery, Respiratory Viruses Branch, Division of Viral Diseases, Centers for Diseases Control and Prevention                                                | Krista Queen, Azaibi Tamin, Jennifer Harcourt, Ying Tao, Clinton R. Paden, Jing Zhang, Yan Li, Anna Uehara, Xiaoyan Lu, Shifaq Kamili, Rashi Gautam, Haibin Wang, Janna' R. Murray, Susan I. Gerber, Stephen Lindstrom, Natalie Thornburg, Suxiang Tong                                                                                                                                      |
| EPI_ISL_407313 | hCoV-19/Hangzhou/HZCDC0001/2020 | Asia / China / Zhejiang / Hangzhou       | 2020-01-19 | Hangzhou Center for Disease Control and Prevention                                                           | Hangzhou Center for Disease Control and Prevention                                                                                                                     | Jun Li, Haoqiu Wang, Hua Yu, Lingfeng Mao, Xinfen Yu, Zhou Sun, Qingxin Kong, Xin Qian, Shuchang Chen, Xuchu Wang                                                                                                                                                                                                                                                                            |
| EPI_ISL_407893 | hCoV-19/Australia/NSW01/2020    | Oceania / Australia / New South Wales    | 2020-01-24 | Centre for Infectious Diseases and Microbiology Laboratory Services                                          | NSW Health Pathology - Institute of Clinical Pathology and Medical Research; Westmead Hospital; University of Sydney                                                   | Eden J-S, Carter I, Rahman H, Holmes EC, Rockett R, O'Sullivan MV, Sintchenko V, Chen SC, Maddocks S, Kok J and Dwyer DE for the 2019-nCoV Study Group                                                                                                                                                                                                                                       |
| EPI_ISL_407894 | hCoV-19/Australia/QLD01/2020    | Oceania / Australia / Queensland / Gr    | 2020-01-28 | Pathology Queensland                                                                                         | Public Health Virology Laboratory                                                                                                                                      | Ben Huang, Alyssa Pyke, Amanda De Jong, Andrew Van Den Hurk, Carmel Taylor, David Warrilow, Doris Genge, Elisabeth Gamez, Glen Hewitson, Ian Maxwell Mackay, Inga Sultana, Jamie McMahon, Jean Barcelon, Judy Northill, Mitchell Finger, Natalie Simpson, Neelima Nair, Peter Burtonclay, Peter Moore, Sarah Wheatley, Sean Moody, Sonja Hall-Mendelin, Timothy Gardam, and Frederick Moore. |
| EPI_ISL_407896 | hCoV-19/Australia/QLD02/2020    | Oceania / Australia / Queensland / Gr    | 2020-01-30 | Pathology Queensland                                                                                         | Public Health Virology Laboratory                                                                                                                                      | Ben Huang, Alyssa Pyke, Amanda De Jong, Andrew Van Den Hurk, Carmel Taylor, David Warrilow, Doris Genge, Elisabeth Gamez, Glen Hewitson, Ian Maxwell Mackay, Inga Sultana, Jamie McMahon, Jean Barcelon, Judy Northill, Mitchell Finger, Natalie Simpson, Neelima Nair, Peter Burtonclay, Peter Moore, Sarah Wheatley, Sean Moody, Sonja Hall-Mendelin, Timothy Gardam, and Frederick Moore. |
| EPI_ISL_407976 | hCoV-19/Belgium/GHB-03021/2020  | Europe / Belgium / Leuven                | 2020-02-03 | KU Leuven, Clinical and Epidemiological Virology                                                             | KU Leuven, Clinical and Epidemiological Virology                                                                                                                       | Bert Vanmechelen, Elke Wollants, Annabel Rector, Els Keyaerts, Lies Laenen, Marc Van Ranst, and Piet Maes                                                                                                                                                                                                                                                                                    |
| EPI_ISL_407987 | hCoV-19/Singapore/2/2020        | Asia / Singapore                         | 2020-01-25 | Singapore General Hospital                                                                                   | Programme in Emerging Infectious Diseases, Duke-NUS Medical School                                                                                                     | Danielle E Anderson, Martin Linster, Yan Zhuang, Jayanthi Jayakumar, Kian Sing Chan, Lynette LE Oon, Jenny GH Low, Yvonne CF Su, Linfa Wang, Gavin JD Smith                                                                                                                                                                                                                                  |
| EPI_ISL_407988 | hCoV-19/Singapore/3/2020        | Asia / Singapore                         | 2020-02-01 | National Centre for Infectious Diseases                                                                      | Programme in Emerging Infectious Diseases, Duke-NUS Medical School                                                                                                     | Danielle E Anderson, Martin Linster, Yan Zhuang, Jayanthi Jayakumar, David CB Lye, Yee Sin Leo, Barnaby E Young, Yvonne CF Su, Linfa Wang, Gavin JD Smith                                                                                                                                                                                                                                    |
| EPI_ISL_408008 | hCoV-19/USA/CA3/2020            | North America / USA / California         | 2020-01-29 | California Department of Health                                                                              | Pathogen Discovery, Respiratory Viruses Branch, Division of Viral Diseases, Centers for Disease Control and Prevention                                                 | Krista Queen, Jing Zhang, Yan Li, Ying Tao, Anna Uehara, Clinton Paden, Xiaoyan Lu, Brian Lynch, Senthil Kumar K. Sakthivel, Brett L. Whitaker, Shifaq Kamili, Lijuan Wang, Janna' R. Murray, Susan I. Gerber, Stephen Lindstrom, Suxiang Tong                                                                                                                                               |
| EPI_ISL_408009 | hCoV-19/USA/CA4/2020            | North America / USA / California         | 2020-01-29 | California Department of Health                                                                              | Pathogen Discovery, Respiratory Viruses Branch, Division of Viral Diseases, Centers for Diseases Control and Prevention                                                | Krista Queen, Jing Zhang, Yan Li, Ying Tao, Anna Uehara, Clinton Paden, Xiaoyan Lu, Brian Lynch, Senthil Kumar K. Sakthivel, Brett L. Whitaker, Shifaq Kamili, Lijuan Wang, Janna' R. Murray, Susan I. Gerber, Stephen Lindstrom, Suxiang Tong                                                                                                                                               |
| EPI_ISL_408010 | hCoV-19/USA/CA5/2020            | North America / USA / California         | 2020-01-29 | California Department of Health                                                                              | Pathogen Discovery, Respiratory Viruses Branch, Division of Viral Diseases, Centers for Diseases Control and Prevention                                                | Ying Tao, Krista Queen, Jing Zhang, Yan Li, Anna Uehara, Clinton Paden, Xiaoyan Lu, Brian Lynch, Senthil Kumar K. Sakthivel, Brett L. Whitaker, Shifaq Kamili, Lijuan Wang, Janna' R. Murray, Susan I. Gerber, Stephen Lindstrom, Suxiang Tong                                                                                                                                               |
| EPI_ISL_408430 | hCoV-19/France/IDF0515/2020     | Europe / France / Ile-de-France / Paris  | 2020-01-29 | Department of Infectious and Tropical Diseases, Bichat Claude Bernard Hospital, Paris                        | National Reference Center for Viruses of Respiratory Infections, Institut Pasteur, Paris                                                                               | Mélanie Albert, Marion Barbet, Sylvie Behillil, Méline Bizard, Angela Brisebarre, Flora Donati, Vincent Enouf, Maud Vanpeene, Sylvie van der Werf, Yazdan Yazdanpanah, Xavier Lescure                                                                                                                                                                                                        |

|                |                                      |                                         |            |                                                                                          |                                                                                                   |                                                                                                                                                                                                                                                                                       |
|----------------|--------------------------------------|-----------------------------------------|------------|------------------------------------------------------------------------------------------|---------------------------------------------------------------------------------------------------|---------------------------------------------------------------------------------------------------------------------------------------------------------------------------------------------------------------------------------------------------------------------------------------|
| EPI_ISL_408431 | hCoV-19/France/IDF0626/2020          | Europe / France / Ile-de-France / Paris | 2020-01-29 | Sorbonne Université, Inserm et Assistance Publique-Hôpitaux de Paris (Pitié Salpêtrière) | National Reference Center for Viruses of Respiratory Infections, Institut Pasteur, Paris          | Mélanie Albert, Marion Barbet, Sylvie Behillil, Méline Bizard, Angela Brisebarre, Flora Donati, Vincent Enouf, Maud Vanpeene, Sylvie van der Werf, Sonia Burrel, Anne-Geneviève Marcelin, Vincent Calvez, David Boutolleau, Elise Klément, Valérie Pourcher, Eric Caumes.             |
| EPI_ISL_408478 | hCoV-19/Chongqing/YC01/2020          | Asia / China / Chongqing / Yongchuan    | 2020-01-21 | Yongchuan District Center for Disease Control and Prevention                             | Chongqing Municipal Center for Disease Control and Prevention                                     | Ye Sheng, Tang Yun, Ling Hua, Yu zhen, Chen Shuang, Tan ZhangPing, Su Kun, Li Qing, Tang Wenge, Rong Rong                                                                                                                                                                             |
| EPI_ISL_408479 | hCoV-19/Chongqing/ZX01/2020          | Asia / China / Chongqing / Zhongxian    | 2020-01-23 | Zhongxian Center for Disease Control and Prevention                                      | Chongqing Municipal Center for Disease Control and Prevention                                     | Ye Sheng, Tang Yun, Ling Hua, Zhang Hong, Yu zhen, Chen Shuang, Tan ZhangPing, Su Kun, Li Qin, Tang Wenge, Rong Rong                                                                                                                                                                  |
| EPI_ISL_408480 | hCoV-19/Yunnan/IVDC-YN-003/2020      | Asia / China / Yunnan / Kunming         | 2020-01-17 | National Institute for Viral Disease Control and Prevention, China CDC                   | National Institute for Viral Disease Control & Prevention, CCDC                                   | Wenjie Tan, Xiaoqing Fu, Xiang Zhao, Wenling Wang, Peihua Niu, Roujian Lu, Yanhong Sun, Baoying Huang, Li Zhao, Fei Ye, Wenbo Xu, George F. Gao, Guizhen Wu                                                                                                                           |
| EPI_ISL_408481 | hCoV-19/Chongqing/IVDC-CQ-001/2020   | Asia / China / Chongqing                | 2020-01-18 | National Institute for Viral Disease Control and Prevention, China CDC                   | National Institute for Viral Disease Control & Prevention, CCDC                                   | Wenjie Tan, Hengqin Wang, Xiang Zhao, Wenling Wang, Peihua Niu, Roujian Lu, Sheng Ye, Baoying Huang, Li Zhao, Fei Ye, Wenbo Xu, George F. Gao, Guizhen Wu                                                                                                                             |
| EPI_ISL_408482 | hCoV-19/Shandong/IVDC-SD-001/2020    | Asia / China / Shandong / Qingdao       | 2020-01-19 | National Institute for Viral Disease Control and Prevention, China CDC                   | National Institute for Viral Disease Control & Prevention, CCDC                                   | Wenjie Tan, Zhaoguo Wang, Xiang Zhao, Wenling Wang, Peihua Niu, Roujian Lu, Ti Liu, Baoying Huang, Li Zhao, Fei Ye, Wenbo Xu, George F. Gao, Guizhen Wu                                                                                                                               |
| EPI_ISL_408483 | hCoV-19/Shanghai/IVDC-SH-001/2020    | Asia / China / Shanghai                 | 2020-01-20 | National Institute for Viral Disease Control and Prevention, China CDC                   | National Institute for Viral Disease Control & Prevention, CCDC                                   | Wenjie Tan, Zhen Teng, Xiang Zhao, Wenling Wang, Peihua Niu, Roujian Lu, Chongshan Li, Baoying Huang, Li Zhao, Fei Ye, Wenbo Xu, George F. Gao, Guizhen Wu                                                                                                                            |
| EPI_ISL_408484 | hCoV-19/Sichuan/IVDC-SC-001/2020     | Asia / China / Sichuan / Chengdu        | 2020-01-15 | National Institute for Viral Disease Control and Prevention, China CDC                   | National Institute for Viral Disease Control & Prevention, CCDC                                   | Wenjie Tan, Jianan Xu, Wenling Wang, Peihua Niu, Roujian Lu, Huiping Yang, Xiang Zhao, Baoying Huang, Li Zhao, Fei Ye, Wenbo Xu, George F. Gao, Guizhen Wu                                                                                                                            |
| EPI_ISL_408485 | hCoV-19/Beijing/IVDC-BJ-005/2020     | Asia / China / Beijing                  | 2020-01-18 | National Institute for Viral Disease Control and Prevention, China CDC                   | National Institute for Viral Disease Control & Prevention, CCDC                                   | Wenjie Tan, Quanyi Wang, Wenling Wang, Peihua Niu, Roujian Lu, Yang Pan, Xiang Zhao, Baoying Huang, Li Zhao, Fei Ye, Wenbo Xu, George F. Gao, Guizhen Wu                                                                                                                              |
| EPI_ISL_408486 | hCoV-19/Jiangxi/IVDC-JX-002/2020     | Asia / China / Jiangxi / Pingxiang      | 2020-01-11 | National Institute for Viral Disease Control and Prevention, China CDC                   | National Institute for Viral Disease Control & Prevention, CCDC                                   | Wenjie Tan, Yong Shi, Wenling Wang, Peihua Niu, Roujian Lu, Jianxiong Li, Xiang Zhao, Baoying Huang, Li Zhao, Fei Ye, Wenbo Xu, George F. Gao, Guizhen Wu                                                                                                                             |
| EPI_ISL_408487 | hCoV-19/Henan/IVDC-HeN-002/2020      | Asia / China / Henan / Zhengzhou        | 2020-01-20 | National Institute for Viral Disease Control and Prevention, China CDC                   | National Institute for Viral Disease Control & Prevention, China CDC                              | Wenjie Tan, Jin Xu, Wenling Wang, Peihua Niu, Roujian Lu, Xueyong Huang, Xiang Zhao, Baoying Huang, Li Zhao, Fei Ye, Wenbo Xu, George F. Gao, Guizhen Wu                                                                                                                              |
| EPI_ISL_408488 | hCoV-19/Jiangsu/IVDC-JS-001/2020     | Asia / China / Jiangsu / Huaian         | 2020-01-19 | National Institute for Viral Disease Control and Prevention, China CDC                   | National Institute for Viral Disease Control & Prevention, CCDC                                   | Wenjie Tan, Shenjiao Wang, Wenling Wang, Peihua Niu, Roujian Lu, Kangchen Zhao, Xiang Zhao, Baoying Huang, Li Zhao, Fei Ye, Wenbo Xu, George F. Gao, Guizhen Wu                                                                                                                       |
| EPI_ISL_408489 | hCoV-19/Taiwan/NTU01/2020            | Asia / Taiwan / Taipei                  | 2020-01-31 | Department of Laboratory Medicine, National Taiwan University Hospital                   | Microbial Genomics Core Lab, National Taiwan University Centers of Genomic and Precision Medicine | Shiou-Hwei Yeh, You-Yu Lin, Ya-Yun Lai, Chiao-Ling Li, Shan-Chwen Chang, Pei-Jer Chen, Sui-Yuan Chang                                                                                                                                                                                 |
| EPI_ISL_408511 | hCoV-19/env/Wuhan/IVDC-HBF13/2020    | Asia / China / Hubei / Wuhan            | 2020-01-01 | Institute of Viral Disease Control and Prevention, China CDC                             | Institute of Viral Disease Control and Prevention, China CDC                                      | William J. Liu, Peipei Liu, Xiang Zhao, Peihua Niu, Yingze Zhao, Wenwen Lei, Ziqian Xu, Beiwei Ye, Weifeng Shi, Roujian Lu, Wenjie Tan, Zhixiao Chen, Yuchao Wu, Juan Song, Dayan Wang, Jun Han, Wenbo Xu, George F. Gao, Guizhen Wu                                                  |
| EPI_ISL_408512 | hCoV-19/env/Wuhan/IVDC-HBF54/2020    | Asia / China / Hubei / Wuhan            | 2020-01-01 | Institute of Viral Disease Control and Prevention, China CDC                             | Institute of Viral Disease Control and Prevention, China CDC                                      | William J. Liu, Peipei Liu, Xiang Zhao, Peihua Niu, Yingze Zhao, Wenwen Lei, Ziqian Xu, Beiwei Ye, Weifeng Shi, Roujian Lu, Wenjie Tan, Zhixiao Chen, Yuchao Wu, Juan Song, Dayan Wang, Jun Han, Wenbo Xu, George F. Gao, Guizhen Wu                                                  |
| EPI_ISL_408513 | hCoV-19/env/Wuhan/IVDC-HBB5/2020     | Asia / China / Hubei / Wuhan            | 2020-01-01 | Institute of Viral Disease Control and Prevention, China CDC                             | Institute of Viral Disease Control and Prevention, China CDC                                      | William J. Liu, Peipei Liu, Xiang Zhao, Peihua Niu, Yingze Zhao, Wenwen Lei, Ziqian Xu, Shumei Zou, Wei Zhen, Beiwei Ye, Mengjie Yang, Weifeng Shi, Roujian Lu, Wenjie Tan, Zhixiao Chen, Yuchao Wu, Juan Song, Weimin Zhou, Dayan Wang, Jun Han, Wenbo Xu, George F. Gao, Guizhen Wu |
| EPI_ISL_408514 | hCoV-19/env/Wuhan/IVDC-HBF13-20/2020 | Asia / China / Hubei / Wuhan            | 2020-01-01 | Institute of Viral Disease Control and Prevention, China CDC                             | Institute of Viral Disease Control and Prevention, China CDC                                      | William J. Liu, Peipei Liu, Xiang Zhao, Peihua Niu, Yingze Zhao, Wenwen Lei, Ziqian Xu, Shumei Zou, Wei Zhen, Beiwei Ye, Mengjie Yang, Weifeng Shi, Roujian Lu, Wenjie Tan, Zhixiao Chen, Yuchao Wu, Juan Song, Weimin Zhou, Dayan Wang, Jun Han, Wenbo Xu, George F. Gao, Guizhen Wu |
| EPI_ISL_408515 | hCoV-19/env/Wuhan/IVDC-HBF13-21/2020 | Asia / China / Hubei / Wuhan            | 2020-01-01 | Institute of Viral Disease Control and Prevention, China CDC                             | Institute of Viral Disease Control and Prevention, China CDC                                      | William J. Liu, Peipei Liu, Xiang Zhao, Peihua Niu, Yingze Zhao, Wenwen Lei, Ziqian Xu, Shumei Zou, Wei Zhen, Beiwei Ye, Mengjie Yang, Weifeng Shi, Roujian Lu, Wenjie Tan, Zhixiao Chen, Yuchao Wu, Juan Song, Weimin Zhou, Dayan Wang, Jun Han, Wenbo Xu, George F. Gao, Guizhen Wu |
| EPI_ISL_408665 | hCoV-19/Japan/TY-WK-012/2020         | Asia / Japan / Tokyo                    | 2020-01-29 | Dept. of Virology III, National Institute of Infectious Diseases                         | Pathogen Genomics Center, National Institute of Infectious Diseases                               | Tsuyoshi Sekizuka, Shutoku Matsuyama, Naganori Nao, Kazuya Shirato, Makoto Takeda, Makoto Kuroda                                                                                                                                                                                      |
| EPI_ISL_408666 | hCoV-19/Japan/TY-WK-501/2020         | Asia / Japan / Tokyo                    | 2020-01-31 | Dept. of Virology III, National Institute of Infectious Diseases                         | Pathogen Genomics Center, National Institute of Infectious Diseases                               | Tsuyoshi Sekizuka, Shutoku Matsuyama, Naganori Nao, Kazuya Shirato, Makoto Takeda, Makoto Kuroda                                                                                                                                                                                      |
| EPI_ISL_408667 | hCoV-19/Japan/TY-WK-521/2020         | Asia / Japan / Tokyo                    | 2020-01-31 | Dept. of Virology III, National Institute of Infectious Diseases                         | Pathogen Genomics Center, National Institute of Infectious Diseases                               | Tsuyoshi Sekizuka, Shutoku Matsuyama, Naganori Nao, Kazuya Shirato, Makoto Takeda, Makoto Kuroda                                                                                                                                                                                      |
| EPI_ISL_408668 | hCoV-19/Vietnam/VR03-38142/2020      | Asia / Vietnam / Thanh Hoa              | 2020-01-24 | National Influenza Center - National Institute of Hygiene and Epidemiology (NIHE)        | National Influenza Center - National Institute of Hygiene and Epidemiology (NIHE)                 | Ung Thi Hong Trang, Hoang Vu Mai Phuong, Nguyen Le Khanh Hang, Nguyen Vu Son, Le Thi Thanh, Vuong Duc Cuong, Nguyen Phuong Anh, Pham Thi Hien, Tran Thu Huong, Le Thi Quynh Mai,                                                                                                      |
| EPI_ISL_408669 | hCoV-19/Japan/KY-V-029/2020          | Asia / Japan / Kyoto                    | 2020-01-29 | Dept. of Virology III, National Institute of Infectious Diseases                         | Pathogen Genomics Center, National Institute of Infectious Diseases                               | Tsuyoshi Sekizuka, Shutoku Matsuyama, Naganori Nao, Kazuya Shirato, Makoto Takeda, Makoto Kuroda                                                                                                                                                                                      |

|                |                                    |                                       |            |                                                                                 |                                                                                                                                                                                           |                                                                                                                                                                                                                                                    |
|----------------|------------------------------------|---------------------------------------|------------|---------------------------------------------------------------------------------|-------------------------------------------------------------------------------------------------------------------------------------------------------------------------------------------|----------------------------------------------------------------------------------------------------------------------------------------------------------------------------------------------------------------------------------------------------|
| EPI_ISL_408670 | hCoV-19/USA/WI1/2020               | North America / USA / Wisconsin       | 2020-01-31 | Wisconsin Department of Health Services                                         | Pathogen Discovery, Respiratory Viruses Branch, Division of Viral Diseases, Centers for Diseases Control and Prevention                                                                   | Jing Zhang, Anna Uehara, Krista Queen, Yan Li, Ying Tao, Clinton R. Paden, Xiaoyan Lu, Brian Lynch, Senthil Kumar K. Sakhthivel, Brett L. Whitaker, Shifaq Kamili, Lijuan Wang, Janna' R. Murray, Susan I. Gerber, Stephen Lindstrom, Suxiang Tong |
| EPI_ISL_408975 | hCoV-19/Hong Kong/VM20001061/2020  | Asia / Hong Kong                      | 2020-01-22 | Queen Elizabeth Hospital                                                        | Hong Kong Department of Health                                                                                                                                                            | Mak Gannon C.K., Cheng Peter K.C., Lam Edman T.K., Chan Rickjason C.W., Tsang Dominic N.C.                                                                                                                                                         |
| EPI_ISL_408976 | hCoV-19/Australia/NSW02/2020       | Oceania / Australia / New South Wales | 2020-01-22 | Centre for Infectious Diseases and Microbiology Laboratory Services             | NSW Health Pathology - Institute of Clinical Pathology and Medical Research; Westmead Hospital; University of Sydney                                                                      | Rockett R, Sadsad R, Eden J-S, Carter I, Rahman H, Holmes EC, O'Sullivan MV, Sintchenko V, Chen SC, Maddocks S, Kok J and Dwyer DE for the 2019-nCoV Study Group*                                                                                  |
| EPI_ISL_408977 | hCoV-19/Australia/NSW03/2020       | Oceania / Australia / New South Wales | 2020-01-25 | Serology, Virology and OTDS Laboratories (SAVID), NSW Health Pathology Randwick | NSW Health Pathology - Institute of Clinical Pathology and Medical Research; Centre for Infectious Diseases and Microbiology Laboratory Services; Westmead Hospital; University of Sydney | Eden J-S, Carter I, Rahman H, Rawlinson W, Holmes EC, Rockett R, O'Sullivan MV, Sintchenko V, Chen SC, Maddocks S, Kok J and Dwyer DE for the 2019-nCoV Study Group*                                                                               |
| EPI_ISL_408978 | hCoV-19/Wuhan/WH05/2020            | Asia / China / Hubei / Wuhan          | 2020-02-07 | Wuhan Fourth Hospital                                                           | Beijing Genomics Institute (BGI)                                                                                                                                                          | Weijun Chen                                                                                                                                                                                                                                        |
| EPI_ISL_408994 | hCoV-19/Hong Kong/VB200117970/2020 | Asia / Hong Kong                      | 2020-01-21 | Prince of Wales Hospital                                                        | Hong Kong Department of Health                                                                                                                                                            | Mak Gannon C.K., Cheng Peter K.C., Lam Edman T.K., Chan Rickjason C.W., Tsang Dominic N.C.                                                                                                                                                         |
| EPI_ISL_408995 | hCoV-19/Hong Kong/VM20001218/2020  | Asia / Hong Kong                      | 2020-01-24 | Tuen Mun Hospital                                                               | Hong Kong Department of Health                                                                                                                                                            | Mak Gannon C.K., Cheng Peter K.C., Lam Edman T.K., Chan Rickjason C.W., Tsang Dominic N.C.                                                                                                                                                         |
| EPI_ISL_408996 | hCoV-19/Hong Kong/VB200119871/2020 | Asia / Hong Kong                      | 2020-01-24 | Prince of Wales Hospital                                                        | Hong Kong Department of Health                                                                                                                                                            | Mak Gannon C.K., Cheng Peter K.C., Lam Edman T.K., Chan Rickjason C.W., Tsang Dominic N.C.                                                                                                                                                         |
| EPI_ISL_408997 | hCoV-19/Hong Kong/VB200119923/2020 | Asia / Hong Kong                      | 2020-01-24 | Prince of Wales Hospital                                                        | Hong Kong Department of Health                                                                                                                                                            | Mak Gannon C.K., Cheng Peter K.C., Lam Edman T.K., Chan Rickjason C.W., Tsang Dominic N.C.                                                                                                                                                         |
| EPI_ISL_408998 | hCoV-19/Hong Kong/VM20001387/2020  | Asia / Hong Kong                      | 2020-01-25 | Ruttonjee Hospital                                                              | Hong Kong Department of Health                                                                                                                                                            | Mak Gannon C.K., Cheng Peter K.C., Lam Edman T.K., Chan Rickjason C.W., Tsang Dominic N.C.                                                                                                                                                         |
| EPI_ISL_408999 | hCoV-19/Hong Kong/VM20001464/2020  | Asia / Hong Kong                      | 2020-01-25 | Prince of Wales Hospital                                                        | Hong Kong Department of Health                                                                                                                                                            | Mak Gannon C.K., Cheng Peter K.C., Lam Edman T.K., Chan Rickjason C.W., Tsang Dominic N.C.                                                                                                                                                         |
| EPI_ISL_409000 | hCoV-19/Hong Kong/VM20001403/2020  | Asia / Hong Kong                      | 2020-01-26 | Tuen Mun Hospital                                                               | Hong Kong Department of Health                                                                                                                                                            | Mak Gannon C.K., Cheng Peter K.C., Lam Edman T.K., Chan Rickjason C.W., Tsang Dominic N.C.                                                                                                                                                         |
| EPI_ISL_409001 | hCoV-19/Hong Kong/VM20001794/2020  | Asia / Hong Kong                      | 2020-01-29 | Queen Mary Hospital                                                             | Hong Kong Department of Health                                                                                                                                                            | Mak Gannon C.K., Cheng Peter K.C., Lam Edman T.K., Chan Rickjason C.W., Tsang Dominic N.C.                                                                                                                                                         |
| EPI_ISL_409002 | hCoV-19/Hong Kong/VM20001776/2020  | Asia / Hong Kong                      | 2020-01-29 | Queen Mary Hospital                                                             | Hong Kong Department of Health                                                                                                                                                            | Mak Gannon C.K., Cheng Peter K.C., Lam Edman T.K., Chan Rickjason C.W., Tsang Dominic N.C.                                                                                                                                                         |
| EPI_ISL_409020 | hCoV-19/Hong Kong/VM20001988/2020  | Asia / Hong Kong                      | 2020-01-30 | Queen Elizabeth Hospital                                                        | Hong Kong Department of Health                                                                                                                                                            | Mak Gannon C.K., Cheng Peter K.C., Lam Edman T.K., Chan Rickjason C.W., Tsang Dominic N.C.                                                                                                                                                         |
| EPI_ISL_409022 | hCoV-19/Hong Kong/VB20024950/2020  | Asia / Hong Kong                      | 2020-01-29 | Princess Margaret Hospital                                                      | Hong Kong Department of Health                                                                                                                                                            | Mak Gannon C.K., Cheng Peter K.C., Lam Edman T.K., Chan Rickjason C.W., Tsang Dominic N.C.                                                                                                                                                         |
| EPI_ISL_409023 | hCoV-19/Hong Kong/VM20002162/2020  | Asia / Hong Kong                      | 2020-01-31 | Queen Elizabeth Hospital                                                        | Hong Kong Department of Health                                                                                                                                                            | Mak Gannon C.K., Cheng Peter K.C., Lam Edman T.K., Chan Rickjason C.W., Tsang Dominic N.C.                                                                                                                                                         |
| EPI_ISL_409024 | hCoV-19/Hong Kong/VB20026565/2020  | Asia / Hong Kong                      | 2020-01-31 | Caritas Medical Centre                                                          | Hong Kong Department of Health                                                                                                                                                            | Mak Gannon C.K., Cheng Peter K.C., Lam Edman T.K., Chan Rickjason C.W., Tsang Dominic N.C.                                                                                                                                                         |
| EPI_ISL_409025 | hCoV-19/Hong Kong/VM20002302/2020  | Asia / Hong Kong                      | 2020-02-01 | Queen Elizabeth Hospital                                                        | Hong Kong Department of Health                                                                                                                                                            | Mak Gannon C.K., Cheng Peter K.C., Lam Edman T.K., Chan Rickjason C.W., Tsang Dominic N.C.                                                                                                                                                         |
| EPI_ISL_409026 | hCoV-19/Hong Kong/VM20002343/2020  | Asia / Hong Kong                      | 2020-02-03 | Queen Elizabeth Hospital                                                        | Hong Kong Department of Health                                                                                                                                                            | Mak Gannon C.K., Cheng Peter K.C., Lam Edman T.K., Chan Rickjason C.W., Tsang Dominic N.C.                                                                                                                                                         |
| EPI_ISL_409027 | hCoV-19/Hong Kong/VM20002345/2020  | Asia / Hong Kong                      | 2020-02-03 | Tseung Kwan O Hospital                                                          | Hong Kong Department of Health                                                                                                                                                            | Mak Gannon C.K., Cheng Peter K.C., Lam Edman T.K., Chan Rickjason C.W., Tsang Dominic N.C.                                                                                                                                                         |
| EPI_ISL_409067 | hCoV-19/USA/MA1/2020               | North America / USA / Massachusetts   | 2020-01-29 | Massachusetts Department of Public Health                                       | Pathogen Discovery, Respiratory Viruses Branch, Division of Viral Diseases, Centers for Diseases Control and Prevention                                                                   | Clinton R. Paden, Jing Zhang, Krista Queen, Yan Li, Ying Tao, Anna Uehara, Xiaoyan Lu, Brian Lynch, Senthil Kumar K. Sakhthivel, Brett L. Whitaker, Shifaq Kamili, Lijuan Wang, Janna' R. Murray, Susan I. Gerber, Stephen Lindstrom, Suxiang Tong |
| EPI_ISL_410044 | hCoV-19/USA/CA6/2020               | North America / USA / California      | 2020-01-27 | California Department of Public Health                                          | Pathogen Discovery, Respiratory Viruses Branch, Division of Viral Diseases, Centers for Diseases Control and Prevention                                                                   | Jing Zhang, Krista Queen, Yan Li, Ying Tao, Anna Uehara, Clinton R. Paden, Xiaoyan Lu, Brian Lynch, Senthil Kumar K. Sakhthivel, Brett L. Whitaker, Shifaq Kamili, Lijuan Wang, Janna' R. Murray, Susan I. Gerber, Stephen Lindstrom, Suxiang Tong |
| EPI_ISL_410045 | hCoV-19/USA/IL2/2020               | North America / USA / Illinois        | 2020-01-28 | IL Department of Public Health Chicago Laboratory                               | Pathogen Discovery, Respiratory Viruses Branch, Division of Viral Diseases, Centers for Diseases Control and Prevention                                                                   | Yan Li, Jing Zhang, Krista Queen, Ying Tao, Anna Uehara, Clinton R. Paden, Xiaoyan Lu, Brian Lynch, Senthil Kumar K. Sakhthivel, Brett L. Whitaker, Shifaq Kamili, Lijuan Wang, Janna' R. Murray, Susan I. Gerber, Stephen Lindstrom, Suxiang Tong |
| EPI_ISL_410218 | hCoV-19/Taiwan/NTU02/2020          | Asia / Taiwan / Taipei                | 2020-02-05 | Department of Laboratory Medicine, National Taiwan University Hospital          | Microbial Genomics Core Lab, National Taiwan University Centers of Genomic and Precision Medicine                                                                                         | Shiou-Hwei Yeh, You-Yu Lin, Ya-Yun Lai, Chiao-Ling Li, Shan-Chwen Chang, Pei-Jer Chen, Sui-Yuan Chang                                                                                                                                              |
| EPI_ISL_410301 | hCoV-19/Nepal/61/2020              | Asia / Nepal / Kathmandu              | 2020-01-13 | National Influenza Centre, National Public Health Laboratory, Kathmandu, Nepal  | The University of Hong Kong                                                                                                                                                               | Ranjit Sah , Runa Jha, Daniel Chu, Haoguo Gu, Maliik Peiris, Anup Bastola, Alfonso J. Rodriguez-Morales, Bibek Kumar Lal, Basu Dev Pandey, Leo Poon                                                                                                |
| EPI_ISL_410302 | hCoV-19/Philippines/026/2020       | Asia / Philippines                    | 2020-01-26 | unknown                                                                         | Amalea Dulcene Nicolasora Research Institute for Tropical Medicine, Molecular Biology Laboratory                                                                                          | Nicolasora,A.D., Mercado,E.S., Polotan,F.M., Manalo,J.G., Medado,I.P., Tujan,M.A., Onza,O.T. and Cruz,K.M.                                                                                                                                         |
| EPI_ISL_410314 | hCoV-19/Philippines/026N/2020      | Asia / Philippines                    | 2020-02-06 | unknown                                                                         | Joanna Ina Manalo Research Institute for Tropical Medicine, Molecular Biology Laboratory                                                                                                  | Manalo,J.I. and Nicolasora,A.D.                                                                                                                                                                                                                    |
| EPI_ISL_410344 | hCoV-19/Philippines/025N/2020      | Asia / Philippines                    | 2020-01-26 | unknown                                                                         | Joanna Ina Manalo Research Institute for Tropical Medicine, Molecular Biology Laboratory                                                                                                  | Mercado,E.S., Manalo,J.I., Nicolasora,A.D., Medado,I.P., Tujan,M.A., Onza,O.T., Cruz,K.M. and Polotan,F.M.                                                                                                                                         |
| EPI_ISL_410345 | hCoV-19/Philippines/022N/2020      | Asia / Philippines                    | 2020-01-23 | unknown                                                                         | Joanna Ina Manalo Research Institute for Tropical Medicine, Molecular Biology Laboratory                                                                                                  | Mercado,E.S., Manalo,J.I., Nicolasora,A.D., Medado,I.P., Tujan,M.A., Onza,O.T., Cruz,K.M. and Polotan,F.M.                                                                                                                                         |

|                |                                     |                                        |            |                                                                                       |                                                                                          |                                                                                                                                                                                                                                                                                                                                                                                              |
|----------------|-------------------------------------|----------------------------------------|------------|---------------------------------------------------------------------------------------|------------------------------------------------------------------------------------------|----------------------------------------------------------------------------------------------------------------------------------------------------------------------------------------------------------------------------------------------------------------------------------------------------------------------------------------------------------------------------------------------|
| EPI_ISL_410486 | hCoV-19/France/RA739/2020           | Europe / France / Rhone-Alpes / Cont   | 2020-02-08 | CNR Virus des Infections Respiratoires - France SUD                                   | CNR Virus des Infections Respiratoires - France SUD                                      | Bal, Antonin; Destras, Gregory; Gaymard, Alexandre; Bouscambert-Duchamp, Maude; Cheynet, Valérie; Brengel-Pesce, Karen; Morfin-Sherpa, Florence; Valette, Martine; Josset, Laurence; Lina, Bruno.                                                                                                                                                                                            |
| EPI_ISL_410487 | hCoV-19/Malaysia/CL5045/2020        | Asia / Malaysia                        | 2020-01-24 | unknown                                                                               | National Public Health Laboratory                                                        | Yu Kie,C., Norazimah,T., Rehan Shuhada,A.B., Selvanesan,S., Noorliza,M.N. and Hani,M.H.                                                                                                                                                                                                                                                                                                      |
| EPI_ISL_410488 | hCoV-19/Malaysia/CL5047/2020        | Asia / Malaysia                        | 2020-01-24 | unknown                                                                               | National Public Health Laboratory                                                        | Yu Kie,C., Norazimah,T., Rehan Shuhada,A.B., Selvanesan,S., Noorliza,M.N. and Hani,M.H.                                                                                                                                                                                                                                                                                                      |
| EPI_ISL_410489 | hCoV-19/Malaysia/CL5049/2020        | Asia / Malaysia                        | 2020-01-24 | unknown                                                                               | National Public Health Laboratory                                                        | Yu Kie,C., Norazimah,T., Rehan Shuhada,A.B., Selvanesan,S., Noorliza,M.N. and Hani,M.H.                                                                                                                                                                                                                                                                                                      |
| EPI_ISL_410531 | hCoV-19/Japan/NA-20-05-1/2020       | Asia / Japan / Nara                    | 2020-01-25 | Dept. of Pathology, National Institute of Infectious Diseases                         | Pathogen Genomics Center, National Institute of Infectious Diseases                      | Tsuyoshi Sekizuka, Harutaka Katano, Shutoku Matsuyama, Naganori Nao, Kazuya Shirato, Motoi Suzuki, Hideki Hasegawa, Takaji Wakita, Makoto Takeda, Tadaki Suzuki, Makoto Kuroda                                                                                                                                                                                                               |
| EPI_ISL_410532 | hCoV-19/Japan/OS-20-07-1/2020       | Asia / Japan / Osaka                   | 2020-01-23 | Dept. of Pathology, National Institute of Infectious Diseases                         | Pathogen Genomics Center, National Institute of Infectious Diseases                      | Kazuya Shirato, Motoi Suzuki, Hideki Hasegawa, Takaji Wakita, Makoto Takeda, Tadaki Suzuki, Makoto Kuroda                                                                                                                                                                                                                                                                                    |
| EPI_ISL_410535 | hCoV-19/Singapore/4/2020            | Asia / Singapore                       | 2020-02-03 | National Centre for Infectious Diseases                                               | Programme in Emerging Infectious Diseases, Duke-NUS Medical School                       | Danielle E Anderson, Martin Linster, Yan Zhuang, Jayanthi Jayakumar, David CB Lye, Yee Sin Leo, Barnaby E Young, Yvonne CF Su, Gavin JD Smith                                                                                                                                                                                                                                                |
| EPI_ISL_410536 | hCoV-19/Singapore/5/2020            | Asia / Singapore                       | 2020-02-06 | Singapore General Hospital, Molecular Laboratory, Division of Pathology               | Programme in Emerging Infectious Diseases, Duke-NUS Medical School                       | Danielle E Anderson, Martin Linster, Yan Zhuang, Jayanthi Jayakumar, Kian Sing Chan, Lynette LE Oon, Shirin Kalimuddin, Jenny GH Low, Yvonne CF Su, Gavin JD Smith                                                                                                                                                                                                                           |
| EPI_ISL_410537 | hCoV-19/Singapore/6/2020            | Asia / Singapore                       | 2020-02-09 | Singapore General Hospital, Molecular Laboratory, Division of Pathology               | Programme in Emerging Infectious Diseases, Duke-NUS Medical School                       | Danielle E Anderson, Martin Linster, Yan Zhuang, Jayanthi Jayakumar, Kian Sing Chan, Lynette LE Oon, Shirin Kalimuddin, Jenny GH Low, Yvonne CF Su, Gavin JD Smith                                                                                                                                                                                                                           |
| EPI_ISL_410538 | hCoV-19/pangolin/Guangxi/P4L/2017   | Asia / China / Guangxi                 | 2017       | Beijing Institute of Microbiology and Epidemiology                                    | Beijing Institute of Microbiology and Epidemiology                                       | Wu-Chun Cao; Tommy Tsan-Yuk Lam; Na Jia; Ya-Wei Zhang; Jia-Fu Jiang; Bao-Gui Jiang                                                                                                                                                                                                                                                                                                           |
| EPI_ISL_410539 | hCoV-19/pangolin/Guangxi/P1E/2017   | Asia / China / Guangxi                 | 2017       | Beijing Institute of Microbiology and Epidemiology                                    | Beijing Institute of Microbiology and Epidemiology                                       | Wu-Chun Cao; Tommy Tsan-Yuk Lam; Na Jia; Ya-Wei Zhang; Jia-Fu Jiang; Bao-Gui Jiang                                                                                                                                                                                                                                                                                                           |
| EPI_ISL_410540 | hCoV-19/pangolin/Guangxi/P5L/2017   | Asia / China / Guangxi                 | 2017       | Beijing Institute of Microbiology and Epidemiology                                    | Beijing Institute of Microbiology and Epidemiology                                       | Wu-Chun Cao; Tommy Tsan-Yuk Lam; Na Jia; Ya-Wei Zhang; Jia-Fu Jiang; Bao-Gui Jiang                                                                                                                                                                                                                                                                                                           |
| EPI_ISL_410541 | hCoV-19/pangolin/Guangxi/P5E/2017   | Asia / China / Guangxi                 | 2017       | Beijing Institute of Microbiology and Epidemiology                                    | Beijing Institute of Microbiology and Epidemiology                                       | Wu-Chun Cao; Tommy Tsan-Yuk Lam; Na Jia; Ya-Wei Zhang; Jia-Fu Jiang; Bao-Gui Jiang                                                                                                                                                                                                                                                                                                           |
| EPI_ISL_410542 | hCoV-19/pangolin/Guangxi/P2V/2017   | Asia / China / Guangxi                 | 2017       | Beijing Institute of Microbiology and Epidemiology                                    | Beijing Institute of Microbiology and Epidemiology                                       | Wu-Chun Cao; Tommy Tsan-Yuk Lam; Na Jia; Ya-Wei Zhang; Jia-Fu Jiang; Bao-Gui Jiang                                                                                                                                                                                                                                                                                                           |
| EPI_ISL_410543 | hCoV-19/pangolin/Guangxi/P3B/2017   | Asia / China / Guangxi                 | 2017       | Beijing Institute of Microbiology and Epidemiology                                    | Beijing Institute of Microbiology and Epidemiology                                       | Wu-Chun Cao; Tommy Tsan-Yuk Lam; Na Jia; Ya-Wei Zhang; Jia-Fu Jiang; Bao-Gui Jiang                                                                                                                                                                                                                                                                                                           |
| EPI_ISL_410544 | hCoV-19/pangolin/Guangdong/P2S/2019 | Asia / China / Guangdong               | 2019       | Beijing Institute of Microbiology and Epidemiology                                    | Beijing Institute of Microbiology and Epidemiology                                       | Wu-Chun Cao; Tommy Tsan-Yuk Lam; Na Jia; Ya-Wei Zhang; Jia-Fu Jiang; Bao-Gui Jiang                                                                                                                                                                                                                                                                                                           |
| EPI_ISL_410545 | hCoV-19/Italy/INMI1-is/2020         | Europe / Italy / Rome                  | 2020-01-29 | INMI Lazzaro Spallanzani IRCCS                                                        | Laboratory of Virology, INMI Lazzaro Spallanzani IRCCS                                   | Maria R. Capobianchi, Cesare E. M. Gruber, Martina Rueca, Barbara Bartolini, Francesco Messina, Emanuela Giombini, Francesca Colavita, Concetta Castilletti, Eleonora Lalle, Fabrizio Carletti, Emanuele Nicastri, Giuseppe Ippolito.                                                                                                                                                        |
| EPI_ISL_410546 | hCoV-19/Italy/INMI1-cs/2020         | Europe / Italy / Rome                  | 2020-01-31 | INMI Lazzaro Spallanzani IRCCS                                                        | Laboratory of Virology, INMI Lazzaro Spallanzani IRCCS                                   | Maria R. Capobianchi, Cesare E. M. Gruber, Martina Rueca, Fabrizio Carletti, Barbara Bartolini, Francesco Messina, Emanuela Giombini, Francesca Colavita, Concetta Castilletti, Eleonora Lalle, Emanuele Nicastri, Giuseppe Ippolito.                                                                                                                                                        |
| EPI_ISL_410713 | hCoV-19/Singapore/7/2020            | Asia / Singapore                       | 2020-01-27 | National Public Health Laboratory, National Centre for Infectious Diseases            | National Public Health Laboratory, National Centre for Infectious Diseases               | Octavia S, Mak TM, Cui L, Lin RTP                                                                                                                                                                                                                                                                                                                                                            |
| EPI_ISL_410714 | hCoV-19/Singapore/8/2020            | Asia / Singapore                       | 2020-02-03 | National Public Health Laboratory, National Centre for Infectious Diseases            | National Public Health Laboratory, National Centre for Infectious Diseases               | Octavia S, Mak TM, Cui L, Lin RTP                                                                                                                                                                                                                                                                                                                                                            |
| EPI_ISL_410715 | hCoV-19/Singapore/9/2020            | Asia / Singapore                       | 2020-02-04 | National Public Health Laboratory, National Centre for Infectious Diseases            | National Public Health Laboratory, National Centre for Infectious Diseases               | Octavia S, Mak TM, Cui L, Lin RTP                                                                                                                                                                                                                                                                                                                                                            |
| EPI_ISL_410716 | hCoV-19/Singapore/10/2020           | Asia / Singapore                       | 2020-02-04 | National Public Health Laboratory, National Centre for Infectious Diseases            | National Centre for Infectious Diseases, National Centre for Infectious Diseases         | Octavia S, Mak TM, Cui L, Lin RTP                                                                                                                                                                                                                                                                                                                                                            |
| EPI_ISL_410717 | hCoV-19/Australia/QLD03/2020        | Oceania / Australia / Queensland / Gr  | 2020-02-05 | Pathology Queensland                                                                  | Public Health Virology Laboratory                                                        | Ben Huang, Alyssa Pyke, Amanda De Jong, Andrew Van Den Hurk, Carmel Taylor, David Warrilow, Doris Genge, Elisabeth Gamez, Glen Hewitson, Ian Maxwell Mackay, Inga Sultana, Jamie McMahon, Jean Barcelon, Judy Northill, Mitchell Finger, Natalie Simpson, Neelima Nair, Peter Burtonclay, Peter Moore, Sarah Wheatley, Sean Moody, Sonja Hall-Mendelin, Timothy Gardam, and Frederick Moore. |
| EPI_ISL_410718 | hCoV-19/Australia/QLD04/2020        | Oceania / Australia / Queensland / Gr  | 2020-02-05 | Pathology Queensland                                                                  | Public Health Virology Laboratory                                                        | Ben Huang, Alyssa Pyke, Amanda De Jong, Andrew Van Den Hurk, Carmel Taylor, David Warrilow, Doris Genge, Elisabeth Gamez, Glen Hewitson, Ian Maxwell Mackay, Inga Sultana, Jamie McMahon, Jean Barcelon, Judy Northill, Mitchell Finger, Natalie Simpson, Neelima Nair, Peter Burtonclay, Peter Moore, Sarah Wheatley, Sean Moody, Sonja Hall-Mendelin, Timothy Gardam, and Frederick Moore. |
| EPI_ISL_410719 | hCoV-19/Singapore/11/2020           | Asia / Singapore                       | 2020-02-02 | National Public Health Laboratory                                                     | National Public Health Laboratory                                                        | Octavia S, Mak TM, Cui L, Lin RTP                                                                                                                                                                                                                                                                                                                                                            |
| EPI_ISL_410720 | hCoV-19/France/IDF0372-is/2020      | Europe / France / Ile-de-France / Pari | 2020-01-23 | Department of Infectious and Tropical Diseases, Bichat Claude Bernard Hospital, Paris | National Reference Center for Viruses of Respiratory Infections, Institut Pasteur, Paris | Mélanie Albert, Marion Barbet, Sylvie Behillil, Méline Bizard, Angela Brisebarre, Flora Donati, Vincent Enouf, Maud Vanpeene, Sylvie van der Werf, Yazdan Yazdanpanah, Xavier Lescurre.                                                                                                                                                                                                      |
| EPI_ISL_410721 | hCoV-19/pangolin/Guangdong/1/2019   | Asia / China / Guangdong               | 2019       | South China Agricultural University                                                   | South China Agricultural University                                                      | Yongyi Shen, Lihua Xiao, Wu Chen                                                                                                                                                                                                                                                                                                                                                             |

|                |                                     |                                         |            |                                                                                             |                                                                                                                                                                                                                                                           |                                                                                                                                                                                                                                                                     |
|----------------|-------------------------------------|-----------------------------------------|------------|---------------------------------------------------------------------------------------------|-----------------------------------------------------------------------------------------------------------------------------------------------------------------------------------------------------------------------------------------------------------|---------------------------------------------------------------------------------------------------------------------------------------------------------------------------------------------------------------------------------------------------------------------|
| EPI_ISL_410984 | hCoV-19/France/IDF0515-isl/2020     | Europe / France / Ile-de-France / Paris | 2020-01-29 | Department of Infectious and Tropical Diseases, Bichat Claude Bernard Hospital, Paris       | National Reference Center for Viruses of Respiratory Infections, Institut Pasteur, Paris                                                                                                                                                                  | Mélanie Albert, Marion Barbet, Sylvie Behillil, Méline Bizard, Angela Brisebarre, Flora Donati, Vincent Enouf, Maud Vanpeene, Sylvie van der Werf, Yazdan Yazdanpanah, Xavier Lescure                                                                               |
| EPI_ISL_411060 | hCoV-19/Fujian/8/2020               | Asia / China / Fujian                   | 2020-01-21 | Fujian Center for Disease Control and Prevention                                            | Fujian Center for Disease Control and Prevention                                                                                                                                                                                                          | Chen Wei, Zhang Yanhua, He Wenxiang, Weng Yuwei                                                                                                                                                                                                                     |
| EPI_ISL_411066 | hCoV-19/Fujian/13/2020              | Asia / China / Fujian                   | 2020-01-22 | Fujian Center for Disease Control and Prevention                                            | Fujian Center for Disease Control and Prevention                                                                                                                                                                                                          | Chen Wei, Zhang Yanhua, He Wenxiang, Weng Yuwei                                                                                                                                                                                                                     |
| EPI_ISL_411218 | hCoV-19/France/IDF0571/2020         | Europe / France / Ile-de-France / Paris | 2020-02-02 | Department of Infectious and Tropical Diseases, Bichat Claude Bernard Hospital, Paris       | Laboratoire Virpath, CIRI U111, UCBL1, INSERM, CNRS, ENS Lyon                                                                                                                                                                                             | Olivier Terrier, Aurélien Traversier, Julien Fouret, Yazdan Yazdanpanah, Xavier Lescure, Catherine Legras-Lachuer, Alexandre Gaymard, Bruno Lina, Manuel Rosa-Calatrava                                                                                             |
| EPI_ISL_411219 | hCoV-19/France/IDF0386-islP1/2020   | Europe / France / Ile-de-France / Paris | 2020-01-28 | Department of Infectious and Tropical Diseases, Bichat Claude Bernard Hospital, Paris       | Laboratoire Virpath, CIRI U111, UCBL1, INSERM, CNRS, ENS Lyon                                                                                                                                                                                             | Olivier Terrier, Aurélien Traversier, Julien Fouret, Yazdan Yazdanpanah, Xavier Lescure, Alexandre Gaymard, Bruno Lina, Manuel Rosa-Calatrava                                                                                                                       |
| EPI_ISL_411220 | hCoV-19/France/IDF0386-islP3/2020   | Europe / France / Ile-de-France / Paris | 2020-01-28 | Department of Infectious and Tropical Diseases, Bichat Claude Bernard Hospital, Paris       | Laboratoire Virpath, CIRI U111, UCBL1, INSERM, CNRS, ENS Lyon                                                                                                                                                                                             | Olivier Terrier, Aurélien Traversier, Julien Fouret, Yazdan Yazdanpanah, Xavier Lescure, Alexandre Gaymard, Bruno Lina, Manuel Rosa-Calatrava                                                                                                                       |
| EPI_ISL_411902 | hCoV-19/Cambodia/0012/2020          | Asia / Cambodia / Sihanoukville         | 2020-01-27 | Virology Unit, Institut Pasteur du Cambodge.                                                | Virology Unit, Institut Pasteur du Cambodge (Sequencing done by: Jessica E Manning/Jennifer A Bohl at Malaria and Vector Research Research Laboratory, National Institute of Allergy and Infectious Diseases and Vida Ahyong from Chan-Zuckerberg Biohub) | Erik A Karlsson, Jennifer A Bohl, Vida Ahyong, Veasna Duong, Philippe Dussart, Jessica E Manning                                                                                                                                                                    |
| EPI_ISL_411915 | hCoV-19/Taiwan/CGMH-CGU-01/2020     | Asia / Taiwan / Taoyuan                 | 2020-01-25 | Laboratory Medicine                                                                         | Department of Laboratory Medicine, Lin-Kou Chang Gung Memorial Hospital, Taoyuan, Taiwan.                                                                                                                                                                 | Kuo-Chien Tsao, Yu-Nong Gong, Shu-Li Yang, Yi-Chun Li, Chung-Guei Huang, Yuh-Chering Huang, Shin-Ru Shih                                                                                                                                                            |
| EPI_ISL_411926 | hCoV-19/Taiwan/3/2020               | Asia / Taiwan / Taipei                  | 2020-01-24 | Taiwan Centers for Disease Control                                                          | Taiwan Centers for Disease Control                                                                                                                                                                                                                        | Ji-Rong Yang, Yu-Chi-Lin, Jung-Jung Mu, Ming-Tsan-Liu                                                                                                                                                                                                               |
| EPI_ISL_411927 | hCoV-19/Taiwan/4/2020               | Asia / Taiwan / Taipei                  | 2020-01-28 | Taiwan Centers for Disease Control                                                          | Taiwan Centers for Disease Control                                                                                                                                                                                                                        | Ji-Rong Yang, Yu-Chi-Lin, Jung-Jung Mu, Ming-Tsan-Liu                                                                                                                                                                                                               |
| EPI_ISL_411929 | hCoV-19/South Korea/SNU01/2020      | Asia / South Korea                      | 2020-01    | unknown                                                                                     | Department of Clinical Diagnostics                                                                                                                                                                                                                        | Park,W.B., Kwon,N.-J., Choi,S.-J., Kang,C.K., Choe,P.G., Kim,J.Y., Yun,J., Lee,G.-W., Seong,M.-W., Kim,N., Seo,J.-S. and Oh,M.-D.                                                                                                                                   |
| EPI_ISL_411949 | hCoV-19/Shanghai/SH-01/2020         | Asia / China / Shanghai                 | 2020-01-16 | unknown                                                                                     | Pathogenic microbiology laboratory, Huashan Hospital, Fudan University                                                                                                                                                                                    | Jing-Wen Ai, Yi Zhang, Hao-Cheng Zhang, Teng Xu, Wen-Hong Zhang                                                                                                                                                                                                     |
| EPI_ISL_411950 | hCoV-19/Jiangsu/JS01/2020           | Asia / China / Jiangsu                  | 2020-01-23 | NHC Key laboratory of Enteric Pathogenic Microbiology, Institute of Pathogenic Microbiology | Jiangsu Provincial Center for Disease Control & Prevention                                                                                                                                                                                                | Lunbiao Cui,Kangchen Zhao,Xiaojuan Zhu,Yiyue Ge,Tao Wu,Bin Wu,Yin Chen,Fengcai Zhu,Baoli Zhu,Ming Wu                                                                                                                                                                |
| EPI_ISL_411951 | hCoV-19/Sweden/01/2020              | Europe / Sweden                         | 2020-02-07 | unknown                                                                                     | Unit for Laboratory Development and Technology                                                                                                                                                                                                            | Bengner,M., Palmerus,M., Lindso,O., Lind Karlberg,M., Montell,V., Appelberg,S., Brave,A., Muradrasoli,S. and Tegmark-Wisell,K.                                                                                                                                      |
| EPI_ISL_411952 | hCoV-19/Jiangsu/JS02/2020           | Asia / China / Jiangsu                  | 2020-01-24 | NHC Key laboratory of Enteric Pathogenic Microbiology, Institute of Pathogenic Microbiology | Jiangsu Provincial Center for Disease Control & Prevention                                                                                                                                                                                                | Kangchen Zhao, Xiaojuan Zhu, Lunbiao Cui, Tao Wu, Yiyue Ge, Bin Wu, Yin Chen, Fengcai Zhu, Baoli Zhu, Ming Wu                                                                                                                                                       |
| EPI_ISL_411953 | hCoV-19/Jiangsu/JS03/2020           | Asia / China / Jiangsu                  | 2020-01-24 | NHC Key laboratory of Enteric Pathogenic Microbiology, Institute of Pathogenic Microbiology | Jiangsu Provincial Center for Disease Control & Prevention                                                                                                                                                                                                | Kangchen Zhao, Xiaojuan Zhu, Lunbiao Cui, Tao Wu, Yiyue Ge, Bin Wu, Yin Chen, Fengcai Zhu, Baoli Zhu, Ming Wu                                                                                                                                                       |
| EPI_ISL_411954 | hCoV-19/USA/CA7/2020                | North America / USA / California        | 2020-02-06 | California Department of Public Health                                                      | Pathogen Discovery, Respiratory Viruses Branch, Division of Viral Diseases, Centers for Diseases Control and Prevention                                                                                                                                   | Krista Queen, Anna Uehara, Jing Zhang, Yan Li, Ying Tao, Clinton R. Paden, Haibin Wang, Shifaq Kamili, Xiaoyan Lu, Brian Lynch, Senthil Kumar K. Sakhthivel, Brett L. Whitaker, Lijuan Wang, Janna' R. Murray, Susan I. Gerber, Stephen Lindstrom, Suxiang Tong     |
| EPI_ISL_411955 | hCoV-19/USA/CA8/2020                | North America / USA / California        | 2020-02-10 | California Department of Public Health                                                      | Pathogen Discovery, Respiratory Viruses Branch, Division of Viral Diseases, Centers for Diseases Control and Prevention                                                                                                                                   | Krista Queen, Anna Uehara, Jing Zhang, Yan Li, Ying Tao, Clinton R. Paden, Haibin Wang, Shifaq Kamili, Xiaoyan Lu, Brian Lynch, Senthil Kumar K. Sakhthivel, Brett L. Whitaker, Lijuan Wang, Janna' R. Murray, Susan I. Gerber, Stephen Lindstrom, Suxiang Tong     |
| EPI_ISL_411956 | hCoV-19/USA/TX1/2020                | North America / USA / Texas             | 2020-02-11 | Texas Department of State Health Services                                                   | Pathogen Discovery, Respiratory Viruses Branch, Division of Viral Diseases, Centers for Diseases Control and Prevention                                                                                                                                   | Krista Queen, Anna Uehara, Jing Zhang, Yan Li, Ying Tao, Clinton R. Paden, Haibin Wang, Shifaq Kamili, Xiaoyan Lu, Brian Lynch, Senthil Kumar K. Sakhthivel, Brett L. Whitaker, Lijuan Wang, Janna' R. Murray, Susan I. Gerber, Stephen Lindstrom, Suxiang Tong     |
| EPI_ISL_411957 | hCoV-19/China/WH-09/2020            | Asia / China                            | 2020-01-08 | unknown                                                                                     | Key Laboratory of Human Diseases, Comparative Medicine, Institute of Laboratory Animal Science                                                                                                                                                            | Linlin,B., Lili,R., Shuran,G., Jiangning,L., Feifei,Q., Qi,L., Fengdi,L., Jing,X., Wei,D., Pin,Y., Yanfeng,X., Yajin,Q., Hong,G., Qiang,W., Mingya,L., Guanpeng,W., Shunyi,W., Zhiqi,S., Li,G., Lan,C., Conghui,W., Ying,W., Xinming,W., Yan,X., Qi,J. and Chuan,Q. |
| EPI_ISL_411958 | hCoV-19/China/HS_8/2020             | Asia / China / HuaShang                 | 2020-01-22 | unknown                                                                                     | Bioinfo, Vision Medicals, Lianhe,                                                                                                                                                                                                                         | Zhang,W.H                                                                                                                                                                                                                                                           |
| EPI_ISL_411959 | hCoV-19/China/HS_17/2020            | Asia / China / HuaShang                 | 2020-01-23 | unknown                                                                                     | Bioinfo, Vision Medicals, Lianhe                                                                                                                                                                                                                          | Zhang,W.H                                                                                                                                                                                                                                                           |
| EPI_ISL_411960 | hCoV-19/China/HS_18/2020            | Asia / China / HuaShang                 | 2020-01-23 | unknown                                                                                     | Bioinfo, Vision Medicals, Lianhe                                                                                                                                                                                                                          | Zhang,W.H                                                                                                                                                                                                                                                           |
| EPI_ISL_411961 | hCoV-19/China/HS_38/2020            | Asia / China / HuaShang                 | 2020-01-25 | unknown                                                                                     | Bioinfo, Vision Medicals, Lianhe                                                                                                                                                                                                                          | Zhang,W.H                                                                                                                                                                                                                                                           |
| EPI_ISL_411962 | hCoV-19/China/HS_46/2020            | Asia / China / HuaShang                 | 2020-01-26 | unknown                                                                                     | Bioinfo, Vision Medicals, Lianhe                                                                                                                                                                                                                          | Zhang,W.H                                                                                                                                                                                                                                                           |
| EPI_ISL_411963 | hCoV-19/China/HS_64/2020            | Asia / China / HuaShang                 | 2020-01-28 | unknown                                                                                     | Bioinfo, Vision Medicals, Lianhe                                                                                                                                                                                                                          | Zhang,W.H                                                                                                                                                                                                                                                           |
| EPI_ISL_411964 | hCoV-19/China/HS_84/2020            | Asia / China / HuaShang                 | 2020-01-30 | unknown                                                                                     | Bioinfo, Vision Medicals, Lianhe                                                                                                                                                                                                                          | Zhang,W.H                                                                                                                                                                                                                                                           |
| EPI_ISL_411965 | hCoV-19/China/HS_86/2020            | Asia / China / HuaShang                 | 2020-01-30 | unknown                                                                                     | Bioinfo, Vision Medicals, Lianhe                                                                                                                                                                                                                          | Zhang,W.H                                                                                                                                                                                                                                                           |
| EPI_ISL_411966 | hCoV-19/China/HS_92/2020            | Asia / China / HuaShang                 | 2020-01-31 | unknown                                                                                     | Bioinfo, Vision Medicals, Lianhe                                                                                                                                                                                                                          | Zhang,W.H                                                                                                                                                                                                                                                           |
| EPI_ISL_411967 | hCoV-19/China/HS_194/2020           | Asia / China / HuaShang                 | 2020-02-06 | unknown                                                                                     | Bioinfo, Vision Medicals, Lianhe                                                                                                                                                                                                                          | Zhang,W.H                                                                                                                                                                                                                                                           |
| EPI_ISL_412026 | hCoV-19/Hefei/2/2020                | Asia / China / Anhui / Hefei            | 2020-02-23 | Second Hospital of Anhui Medical University                                                 | Second Hospital of Anhui Medical University                                                                                                                                                                                                               | Changtai Wang, Zhongping Liua, Zixiang Chen, Xin Huang, Mengyuan Xua, Tengfei He, Mengji Lu, Zhenhua Zhang                                                                                                                                                          |
| EPI_ISL_412028 | hCoV-19/Hong Kong/VM20001061/2020   | Asia / Hong Kong                        | 2020-01-22 | Hong Kong Department of Health                                                              | School of Public Health, The University of Hong Kong                                                                                                                                                                                                      | Dominic N.C. Tsang, Daniel K.W. Chu, Leo L.M. Poon, Malik Peiris                                                                                                                                                                                                    |
| EPI_ISL_412029 | hCoV-19/Hong Kong/VB20024950-2/2020 | Asia / Hong Kong                        | 2020-01-30 | Hong Kong Department of Health                                                              | The University of Hong Kong                                                                                                                                                                                                                               | Dominic N.C. Tsang, Daniel K.W. Chu, Leo L.M. Poon, Malik Peiris                                                                                                                                                                                                    |
| EPI_ISL_412030 | hCoV-19/Hong Kong/VB20026565-2/2020 | Asia / Hong Kong                        | 2020-02-01 | Hong Kong Department of Health                                                              | School of Public Health, The University of Hong Kong                                                                                                                                                                                                      | Dominic N.C. Tsang, Daniel K.W. Chu, Leo L.M. Poon, Malik Peiris                                                                                                                                                                                                    |
| EPI_ISL_412034 | hCoV-19/Wuhan/Tongji-01/2020        | Asia / China / Wuhan                    | 2020-01    | unknown                                                                                     | Department of Clinical Laboratory, Tongji Hospital                                                                                                                                                                                                        | Liu,W., Zhang,Q., Song,H., Xiang,R., Sun,Z. and Liu,Y                                                                                                                                                                                                               |
| EPI_ISL_412035 | hCoV-19/Wuhan/Tongji-02/2020        | Asia / China / Wuhan                    | 2020-01    | unknown                                                                                     | Department of Clinical Laboratory, Tongji Hospital                                                                                                                                                                                                        | Liu,W., Zhang,Q., Song,H., Xiang,R., Sun,Z. and Liu,Y                                                                                                                                                                                                               |
| EPI_ISL_412036 | hCoV-19/Wuhan/Tongji-03/2020        | Asia / China / Wuhan                    | 2020-01    | unknown                                                                                     | Department of Clinical Laboratory, Tongji Hospital                                                                                                                                                                                                        | Liu,W., Zhang,Q., Song,H., Xiang,R., Sun,Z. and Liu,Y                                                                                                                                                                                                               |
| EPI_ISL_412037 | hCoV-19/Wuhan/Tongji-04/2020        | Asia / China / Wuhan                    | 2020-01    | unknown                                                                                     | Department of Clinical Laboratory, Tongji Hospital                                                                                                                                                                                                        | Liu,W., Zhang,Q., Song,H., Xiang,R., Sun,Z. and Liu,Y                                                                                                                                                                                                               |
| EPI_ISL_412038 | hCoV-19/Wuhan/Tongji-05/2020        | Asia / China / Wuhan                    | 2020-01    | unknown                                                                                     | Department of Clinical Laboratory, Tongji Hospital                                                                                                                                                                                                        | Liu,W., Zhang,Q., Song,H., Xiang,R., Sun,Z. and Liu,Y                                                                                                                                                                                                               |
| EPI_ISL_412039 | hCoV-19/Wuhan/Tongji-06/2020        | Asia / China / Wuhan                    | 2020-01    | unknown                                                                                     | Department of Clinical Laboratory, Tongji Hospital                                                                                                                                                                                                        | Liu,W., Zhang,Q., Song,H., Xiang,R., Sun,Z. and Liu,Y                                                                                                                                                                                                               |



|                |                                    |                                        |            |                                                               |                                                            |                                                                                                                                                                                                                                           |
|----------------|------------------------------------|----------------------------------------|------------|---------------------------------------------------------------|------------------------------------------------------------|-------------------------------------------------------------------------------------------------------------------------------------------------------------------------------------------------------------------------------------------|
| EPI_ISL_412041 | hCoV-19/Shenzhen/HKU-SZ-001/2020   | Asia / China / Shenzhen                | 2020-01    | unknown                                                       | University of Hong Kong-Shenzhen Hospital                  | Chan,J.F.-W., Yuan,S., Kok,K.H., To,K.K.-W., Chu,H., Yang,J., Xing,F., Liu,J., Yip,C.C.-Y., Poon,R.W.-S., Tsai,H.W., Lo,S.K.-F., Chan,K.H., Poon,V.K.-M., Chan,W.M., Ip,J.D., Cai,J.P., Cheng,V.C.-C., Chen,H., Hui,C.K.-M. and Yuen,K.Y. |
| EPI_ISL_412042 | hCoV-19/Shenzhen/HKU-SZ-004/2020   | Asia / China / Shenzhen                | 2020-01    | unknown                                                       | University of Hong Kong-Shenzhen Hospital                  | Chan,J.F.-W., Yuan,S., Kok,K.H., To,K.K.-W., Chu,H., Yang,J., Xing,F., Liu,J., Yip,C.C.-Y., Poon,R.W.-S., Tsai,H.W., Lo,S.K.-F., Chan,K.H., Poon,V.K.-M., Chan,W.M., Ip,J.D., Cai,J.P., Cheng,V.C.-C., Chen,H., Hui,C.K.-M. and Yuen,K.Y. |
| EPI_ISL_412043 | hCoV-19/Shenzhen/HKU-SZ-001-2/2020 | Asia / China / Shenzhen                | 2020-01    | unknown                                                       | University of Hong Kong-Shenzhen Hospital                  | Chan,J.F.-W., Yuan,S., Kok,K.H., To,K.K.-W., Chu,H., Yang,J., Xing,F., Liu,J., Yip,C.C.-Y., Poon,R.W.-S., Tsai,H.W., Lo,S.K.-F., Chan,K.H., Poon,V.K.-M., Chan,W.M., Ip,J.D., Cai,J.P., Cheng,V.C.-C., Chen,H., Hui,C.K.-M. and Yuen,K.Y. |
| EPI_ISL_412044 | hCoV-19/Shenzhen/HKU-SZ-002b/2020  | Asia / China / Shenzhen                | 2020-01    | unknown                                                       | University of Hong Kong-Shenzhen Hospital                  | Chan,J.F.-W., Yuan,S., Kok,K.H., To,K.K.-W., Chu,H., Yang,J., Xing,F., Liu,J., Yip,C.C.-Y., Poon,R.W.-S., Tsai,H.W., Lo,S.K.-F., Chan,K.H., Poon,V.K.-M., Chan,W.M., Ip,J.D., Cai,J.P., Cheng,V.C.-C., Chen,H., Hui,C.K.-M. and Yuen,K.Y. |
| EPI_ISL_412045 | hCoV-19/Shenzhen/HKU-SZ-004-2/2020 | Asia / China / Shenzhen                | 2020-01    | unknown                                                       | University of Hong Kong-Shenzhen Hospital                  | Chan,J.F.-W., Yuan,S., Kok,K.H., To,K.K.-W., Chu,H., Yang,J., Xing,F., Liu,J., Yip,C.C.-Y., Poon,R.W.-S., Tsai,H.W., Lo,S.K.-F., Chan,K.H., Poon,V.K.-M., Chan,W.M., Ip,J.D., Cai,J.P., Cheng,V.C.-C., Chen,H., Hui,C.K.-M. and Yuen,K.Y. |
| EPI_ISL_412046 | hCoV-19/Shenzhen/HKU-SZ-005-2/2020 | Asia / China / Shenzhen                | 2020-01    | unknown                                                       | University of Hong Kong-Shenzhen Hospital                  | Chan,J.F.-W., Yuan,S., Kok,K.H., To,K.K.-W., Chu,H., Yang,J., Xing,F., Liu,J., Yip,C.C.-Y., Poon,R.W.-S., Tsai,H.W., Lo,S.K.-F., Chan,K.H., Poon,V.K.-M., Chan,W.M., Ip,J.D., Cai,J.P., Cheng,V.C.-C., Chen,H., Hui,C.K.-M. and Yuen,K.Y. |
| EPI_ISL_412049 | hCoV-19/China/HKU-SZ-007a/2020     | Asia / China                           | 2020-01    | unknown                                                       | University of Hong Kong- Shenzhen Hospital                 | Chan,J.F.-W., Yuan,S., Kok,K.H., To,K.K.-W., Chu,H., Yang,J., Xing,F., Liu,J., Yip,C.C.-Y., Poon,R.W.-S., Tsai,H.W., Lo,S.K.-F., Chan,K.H., Poon,V.K.-M., Chan,W.M., Ip,J.D., Cai,J.P., Cheng,V.C.-C., Chen,H., Hui,C.K.-M. and Yuen,K.Y. |
| EPI_ISL_412050 | hCoV-19/China/HKU-SZ-007b/2020     | Asia / China                           | 2020-01    | unknown                                                       | The University of Hong Kong- Shenzhen Hospital             | Chan,J.F.-W., Yuan,S., Kok,K.H., To,K.K.-W., Chu,H., Yang,J., Xing,F., Liu,J., Yip,C.C.-Y., Poon,R.W.-S., Tsai,H.W., Lo,S.K.-F., Chan,K.H., Poon,V.K.-M., Chan,W.M., Ip,J.D., Cai,J.P., Cheng,V.C.-C., Chen,H., Hui,C.K.-M. and Yuen,K.Y. |
| EPI_ISL_412051 | hCoV-19/China/HKU-SZ-007c/2020     | Asia / China                           | 2020-01    | unknown                                                       | The University of Hong Kong- Shenzhen Hospital             | Chan,J.F.-W., Yuan,S., Kok,K.H., To,K.K.-W., Chu,H., Yang,J., Xing,F., Liu,J., Yip,C.C.-Y., Poon,R.W.-S., Tsai,H.W., Lo,S.K.-F., Chan,K.H., Poon,V.K.-M., Chan,W.M., Ip,J.D., Cai,J.P., Cheng,V.C.-C., Chen,H., Hui,C.K.-M. and Yuen,K.Y. |
| EPI_ISL_412052 | hCoV-19/China/HKU-SZ-007a-2/2020   | Asia / China                           | 2020-01    | unknown                                                       | The University of Hong Kong- Shenzhen Hospital             | Chan,J.F.-W., Yuan,S., Kok,K.H., To,K.K.-W., Chu,H., Yang,J., Xing,F., Liu,J., Yip,C.C.-Y., Poon,R.W.-S., Tsai,H.W., Lo,S.K.-F., Chan,K.H., Poon,V.K.-M., Chan,W.M., Ip,J.D., Cai,J.P., Cheng,V.C.-C., Chen,H., Hui,C.K.-M. and Yuen,K.Y. |
| EPI_ISL_412053 | hCoV-19/China/HKU-SZ-007b-2/2020   | Asia / China                           | 2020-01    | unknown                                                       | The University of Hong Kong- Shenzhen Hospital             | Chan,J.F.-W., Yuan,S., Kok,K.H., To,K.K.-W., Chu,H., Yang,J., Xing,F., Liu,J., Yip,C.C.-Y., Poon,R.W.-S., Tsai,H.W., Lo,S.K.-F., Chan,K.H., Poon,V.K.-M., Chan,W.M., Ip,J.D., Cai,J.P., Cheng,V.C.-C., Chen,H., Hui,C.K.-M. and Yuen,K.Y. |
| EPI_ISL_412054 | hCoV-19/China/HKU-SZ-007c-2/2020   | Asia / China                           | 2020-01    | unknown                                                       | The University of Hong Kong- Shenzhen Hospital             | Chan,J.F.-W., Yuan,S., Kok,K.H., To,K.K.-W., Chu,H., Yang,J., Xing,F., Liu,J., Yip,C.C.-Y., Poon,R.W.-S., Tsai,H.W., Lo,S.K.-F., Chan,K.H., Poon,V.K.-M., Chan,W.M., Ip,J.D., Cai,J.P., Cheng,V.C.-C., Chen,H., Hui,C.K.-M. and Yuen,K.Y. |
| EPI_ISL_412387 | hCoV-19/Shandong/LY001/2020        | Asia / China / Shandong / Linyi county | 2020-01-21 | Shandong Provincial Center for Disease Control and Prevention | Beijing Institute of Microbiology and Epidemiology         | Xiao-Lin Jiang, Wen-Kui Sun, Xiang-Na Zhao, Yang Hang, Zeng-Qiang Kou, Lin-Yao, Li-Jun Duan, Xiao Wei, Mai-Juan Ma, Dian-Ming Kang                                                                                                        |
| EPI_ISL_412418 | hCoV-19/Shandong/LY002/2020        | Asia / China / Shandong / Linyi        | 2020-01-21 | Shandong Provincial Center for Disease Control and Prevention | Beijing Institute of Microbiology and Epidemiology         | Xiao-Lin Jiang, Wen-Kui Sun, Xiang-Na Zhao, Yang Hang, Zeng-Qiang Kou, Lin-Yao, Li-Jun Duan, Xiao Wei, Dian-Ming Kang, Mai-Juan Ma                                                                                                        |
| EPI_ISL_412419 | hCoV-19/Shandong/LY003/2020        | Asia / China / Shandong / Linyi        | 2020-01-23 | Shandong Provincial Center for Disease Control and Prevention | Beijing Institute of Microbiology and Epidemiology         | Xiao-Lin Jiang, Wen-Kui Sun, Xiang-Na Zhao, Yang Hang, Zeng-Qiang Kou, Lin-Yao, Li-Jun Duan, Xiao Wei, Dian-Ming Kang, Mai-Juan Ma                                                                                                        |
| EPI_ISL_412420 | hCoV-19/Shandong/LY004/2020        | Asia / China / Shandong / Linyi        | 2020-01-26 | Shandong Provincial Center for Disease Control and Prevention | Beijing Institute of Microbiology and Epidemiology         | Xiao-Lin Jiang, Wen-Kui Sun, Xiang-Na Zhao, Yang Hang, Zeng-Qiang Kou, Lin-Yao, Li-Jun Duan, Xiao Wei, Dian-Ming Kang, Mai-Juan Ma                                                                                                        |
| EPI_ISL_412421 | hCoV-19/Shandong/LY005/2020        | Asia / China / Shandong / Linyi        | 2020-01-24 | Shandong Provincial Center for Disease Control and Prevention | Beijing Institute of Microbiology and Epidemiology         | Xiao-Lin Jiang, Wen-Kui Sun, Xiang-Na Zhao, Yang Hang, Zeng-Qiang Kou, Lin-Yao, Li-Jun Duan, Xiao Wei, Dian-Ming Kang, Mai-Juan Ma                                                                                                        |
| EPI_ISL_412422 | hCoV-19/Shandong/LY006/2020        | Asia / China / Shandong / Linyi        | 2020-01-24 | Shandong Provincial Center for Disease Control and Prevention | Beijing Institute of Microbiology and Epidemiology         | Xiao-Lin Jiang, Wen-Kui Sun, Xiang-Na Zhao, Yang Hang, Zeng-Qiang Kou, Lin-Yao, Li-Jun Duan, Xiao Wei, Dian-Ming Kang, Mai-Juan Ma                                                                                                        |
| EPI_ISL_412423 | hCoV-19/Shandong/LY007/2020        | Asia / China / Shandong / Linyi        | 2020-01-25 | Shandong Provincial Center for Disease Control and Prevention | Beijing Institute of Microbiology and Epidemiology         | Xiao-Lin Jiang, Wen-Kui Sun, Xiang-Na Zhao, Yang Hang, Zeng-Qiang Kou, Lin-Yao, Li-Jun Duan, Xiao Wei, Dian-Ming Kang, Mai-Juan Ma                                                                                                        |
| EPI_ISL_412424 | hCoV-19/Shandong/LY008/2020        | Asia / China / Shandong / Linyi        | 2020-01-30 | Shandong Provincial Center for Disease Control and Prevention | Beijing Institute of Microbiology and Epidemiology         | Xiao-Lin Jiang, Wen-Kui Sun, Xiang-Na Zhao, Yang Hang, Zeng-Qiang Kou, Lin-Yao, Li-Jun Duan, Xiao Wei, Dian-Ming Kang, Mai-Juan Ma                                                                                                        |
| EPI_ISL_412425 | hCoV-19/env/Shandong/LY-H13/2020   | Asia / China / Shandong / Linyi        | 2020-01-26 | Shandong Provincial Center for Disease Control and Prevention | Beijing Institute of Microbiology and Epidemiology         | Xiao-Lin Jiang, Wen-Kui Sun, Xiang-Na Zhao, Yang Hang, Zeng-Qiang Kou, Lin-Yao, Li-Jun Duan, Xiao Wei, Dian-Ming Kang, Mai-Juan Ma                                                                                                        |
| EPI_ISL_412426 | hCoV-19/env/Shandong/LY-H15/2020   | Asia / China / Shandong / Linyi        | 2020-01-26 | Shandong Provincial Center for Disease Control and Prevention | Beijing Institute of Microbiology and Epidemiology         | Xiao-Lin Jiang, Wen-Kui Sun, Xiang-Na Zhao, Yang Hang, Zeng-Qiang Kou, Lin-Yao, Li-Jun Duan, Xiao Wei, Dian-Ming Kang, Mai-Juan Ma                                                                                                        |
| EPI_ISL_412459 | hCoV-19/Jingzhou/HBCDC-HB-01/2020  | Asia / China / Hubei / Jingzhou        | 2020-01-08 | Jingzhou Center for Disease Control and Prevention            | Hubei Provincial Center for Disease Control and Prevention | Bin Fang, Xiang Li, Xiao Yu, Linlin Liu, Bo Yang, Faxian Zhan, Guojun Ye, Xixiang Huo, Junqiang Xu, Bo Yu, Kun Cai, Jing Li, Maoyi Chen, Jie Hu, Chunlin Mao, Yongzhong Jiang.                                                            |

|                |                                         |                                       |            |                                                                                    |                                                                                                                                     |                                                                                                                                                                                                                                                                                                                                                                            |
|----------------|-----------------------------------------|---------------------------------------|------------|------------------------------------------------------------------------------------|-------------------------------------------------------------------------------------------------------------------------------------|----------------------------------------------------------------------------------------------------------------------------------------------------------------------------------------------------------------------------------------------------------------------------------------------------------------------------------------------------------------------------|
| EPI_ISL_412860 | hCoV-19/pangolin/China/MP789/2019       | Asia / China                          | 2019-03-19 | unknown                                                                            | SCSFRI, South China Sea Fisheries Research Institute, Chinese Academy of Fishery Sciences (SCSFRI, CAFS)                            | Jiang,J.-Z., Liu,P. and Chen,J.-P.                                                                                                                                                                                                                                                                                                                                         |
| EPI_ISL_412862 | hCoV-19/USA/CA9/2020                    | North America / USA / California / So | 2020-02-23 | California Department of Public Health                                             | Pathogen Discovery, Respiratory Viruses Branch, Division of Viral Diseases, Centers for Disease Control and Prevention              | Krista Queen, Anna Uehara, Jing Zhang, Yan Li, Ying Tao, Clinton R. Paden, Haibin Wang, Shifaq Kamili, Xiaoyan Lu, Brian Lynch, Senthil Kumar K. Sakthivel, Brett L. Whitaker, Lijuan Wang, Janna R. Murray, Jasmine Padilla, Justin Lee, Susan I. Gerber, Stephen Lindstrom, Suxiang Tong                                                                                 |
| EPI_ISL_412869 | hCoV-19/South Korea/KCDC05/2020         | Asia / South Korea / Seoul            | 2020-01-30 | Division of Infectious Diseases, Korea Centers for Diseases Control and Prevention | Division of Viral Diseases, Center for Laboratory Control of Infectious Diseases, Korea Centers for Diseases Control and Prevention | Jeong-Min Kim, Yoon-Seok Chung, Namjoo Lee, Mi-Seon Kim, Sang Hee Woo, Hye-Jun Jo, Sehee Park, Heui Man Kim, Myung Guk Han                                                                                                                                                                                                                                                 |
| EPI_ISL_412870 | hCoV-19/South Korea/KCDC06/2020         | Asia / South Korea / Seoul            | 2020-01-30 | Division of Infectious Diseases, Korea Centers for Diseases Control and Prevention | Division of Viral Diseases, Center for Laboratory Control of Infectious Diseases, Korea Centers for Diseases Control and Prevention | Jeong-Min Kim, Yoon-Seok Chung, Namjoo Lee, Mi-Seon Kim, Sang Hee Woo, Hye-Jun Jo, Sehee Park, Heui Man Kim, Myung Guk Han                                                                                                                                                                                                                                                 |
| EPI_ISL_412871 | hCoV-19/South Korea/KCDC07/2020         | Asia / South Korea / Seoul            | 2020-01-31 | Division of Infectious Diseases, Korea Centers for Diseases Control and Prevention | Division of Viral Diseases, Center for Laboratory Control of Infectious Diseases, Korea Centers for Diseases Control and Prevention | Jeong-Min Kim, Yoon-Seok Chung, Namjoo Lee, Mi-Seon Kim, Sang Hee Woo, Hye-Jun Jo, Sehee Park, Heui Man Kim, Myung Guk Han                                                                                                                                                                                                                                                 |
| EPI_ISL_412872 | hCoV-19/South Korea/KCDC12/2020         | Asia / South Korea / Gyeonggi-do      | 2020-02-01 | Division of Infectious Diseases, Korea Centers for Diseases Control and Prevention | Division of Viral Diseases, Center for Laboratory Control of Infectious Diseases, Korea Centers for Diseases Control and Prevention | Jeong-Min Kim, Yoon-Seok Chung, Namjoo Lee, Mi-Seon Kim, Sang Hee Woo, Hye-Jun Jo, Sehee Park, Heui Man Kim, Myung Guk Han                                                                                                                                                                                                                                                 |
| EPI_ISL_412873 | hCoV-19/South Korea/KCDC24/2020         | Asia / South Korea / Chungcheongnai   | 2020-02-06 | Division of Infectious Diseases, Korea Centers for Diseases Control and Prevention | Division of Viral Diseases, Center for Laboratory Control of Infectious Diseases, Korea Centers for Diseases Control and Prevention | Jeong-Min Kim, Yoon-Seok Chung, Namjoo Lee, Mi-Seon Kim, Sang Hee Woo, Hye-Jun Jo, Sehee Park, Heui Man Kim, Myung Guk Han                                                                                                                                                                                                                                                 |
| EPI_ISL_412898 | hCoV-19/Wuhan/HBCDC-HB-02/2019          | Asia / China / Hubei / Wuhan          | 2019-12-30 | Wuhan Jinyintan Hospital                                                           | Hubei Provincial Center for Disease Control and Prevention                                                                          | Bin Fang, Xiang Li, Xiao Yu, Linlin Liu, Bo Yang, Faxian Zhan, Guojun Ye, Xixiang Huo, Junqiang Xu, Bo Yu, Kun Cai, Jing Li, Yongzhong Jiang.                                                                                                                                                                                                                              |
| EPI_ISL_412899 | hCoV-19/Wuhan/HBCDC-HB-03/2019          | Asia / China / Hubei / Wuhan          | 2019-12-30 | Wuhan Jinyintan Hospital                                                           | Hubei Provincial Center for Disease Control and Prevention                                                                          | Bin Fang, Xiang Li, Xiao Yu, Linlin Liu, Bo Yang, Faxian Zhan, Guojun Ye, Xixiang Huo, Junqiang Xu, Bo Yu, Kun Cai, Jing Li, Yongzhong Jiang.                                                                                                                                                                                                                              |
| EPI_ISL_412900 | hCoV-19/Wuhan/HBCDC-HB-04/2019          | Asia / China / Hubei / Wuhan          | 2019-12-30 | Wuhan Jinyintan Hospital                                                           | Hubei Provincial Center for Disease Control and Prevention                                                                          | Bin Fang, Xiang Li, Xiao Yu, Linlin Liu, Bo Yang, Faxian Zhan, Guojun Ye, Xixiang Huo, Junqiang Xu, Bo Yu, Kun Cai, Jing Li, Yongzhong Jiang.                                                                                                                                                                                                                              |
| EPI_ISL_412912 | hCoV-19/Germany/Baden-Wuerttemberg-1/2/ | Europe / Germany / Baden-Wuerttem     | 2020-02-25 | State Health Office Baden-Wuerttemberg                                             | Charité Universitätsmedizin Berlin, Institute of Virology                                                                           | Victor M Corman, Julia Schneider, Barbara Mühlemann, Talitha Veith, Jörn Beheim-Schwarzbach, Terry Jones, Rainer Oehme, Silke Fischer, Christian Drosten                                                                                                                                                                                                                   |
| EPI_ISL_412964 | hCoV-19/Brazil/SPBR-01/2020             | South America / Brazil / Sao Paulo /  | 2020-02-25 | Hospital Israelita Albert Einstein                                                 | Instituto Adolfo Lutz Interdisciplinary Procedures Center Strategic Laboratory                                                      | Jaqueline Goes de Jesus, Claudio Tavares Sacchi, Daniela Bernardes Borges da Silva, Ingra Moraes Claro, Flávia Cristina da Silva Sales, Claudia Regina Gonçalves, Joshua Quick, Maria do Carmo, Sampaio Tavares Timenetsky, Nicholas James Loman, Andrew Rambaut, Ester Cerdeira Sabino, Nuno Rodrigues Faria                                                              |
| EPI_ISL_412965 | hCoV-19/Canada/BC_37_0-2/2020           | North America / Canada / British Colu | 2020-02-16 | BCCDC Public Health Laboratory                                                     | BCCDC Public Health Laboratory                                                                                                      | Harrigan, Prystajecy, Krajden, Lee, Kamelian, Lapointe, Choi, Hoang, Sekirov, Levett, Tyson, Loman, Quick, Li, Gilmour                                                                                                                                                                                                                                                     |
| EPI_ISL_412966 | hCoV-19/China/IQTC01/2020               | Asia / China / Guangdong / Guangzho   | 2020-02-05 | unknown                                                                            | Technology Centre, Guangzhou Customs                                                                                                | Shi,Y., Sun,J., Zheng,K., Huang,J. and Zhao,J.                                                                                                                                                                                                                                                                                                                             |
| EPI_ISL_412967 | hCoV-19/China/IQTC02/2020               | Asia / China / Guangzhou              | 2020-01-29 | unknown                                                                            | Technology Centre, Guangzhou Customs                                                                                                | Shi,Y., Zheng,K., Sun,J., Huang,J., Zhu,A., Zhuang,Z., Dai,J., Chen,Z., Sun,F., Zhang,Z., Li,X. and Wang,Y.                                                                                                                                                                                                                                                                |
| EPI_ISL_412968 | hCoV-19/Japan/Hu_DP_Kng_19-020/2020     | Asia / Japan                          | 2020-02-10 | unknown                                                                            | Takayuki Hishiki Kanagawa Prefectural Institute of Public Health, Department of Microbiology                                        | Hishiki,T., Suzuki,R., Sakuragi,J., Usui,K., Tanaka,Y., Kawai,J., Kogo,Y., Matsuki,Y., An,T., Hayashizaki,Y. and Takasaki,T.                                                                                                                                                                                                                                               |
| EPI_ISL_412969 | hCoV-19/Japan/Hu_DP_Kng_19-027/2020     | Asia / Japan                          | 2020-02-10 | unknown                                                                            | Takayuki Hishiki Kanagawa Prefectural Institute of Public Health, Department of Microbiology                                        | Hishiki,T., Suzuki,R., Sakuragi,J., Usui,K., Tanaka,Y., Kawai,J., Kogo,Y., Matsuki,Y., An,T., Hayashizaki,Y. and Takasaki,T.                                                                                                                                                                                                                                               |
| EPI_ISL_412970 | hCoV-19/USA/WA2/2020                    | North America / USA / Washington /    | 2020-02-24 | Washington State Department of Health                                              | Seattle Flu Study                                                                                                                   | Helen Chu, Michael Boeckh, Janet Englund, Michael Famulare, Barry Lutz, Deborah Nickerson, Mark Rieder, Lea Starita, Matthew Thompson, Jay Shendure, and Trevor Bedford                                                                                                                                                                                                    |
| EPI_ISL_412971 | hCoV-19/Finland/FIN-25/2020             | Europe / Finland / Helsinki           | 2020-02-25 | HUS Diagnostikkakeskus, Hallinto                                                   | Department of Virology Faculty of Medicine, Medicum University of Helsinki                                                          | Teemu Smura, Suvi Kuivanen, Hannimari Kallio-Kokko, Olli Vapalahti                                                                                                                                                                                                                                                                                                         |
| EPI_ISL_412972 | hCoV-19/Mexico/CDMX-INDRE_01/2020       | North America / Mexico / Mexico City  | 2020-02-27 | Instituto Nacional de Enfermedades Respiratorias                                   | Instituto de Diagnostico y Referencia Epidemiologicos (INDRE)                                                                       | Ramirez-Gonzalez Ernesto, Garces-Ayala Fabiola, Araiza-Rodriguez Adnan, Mendieta-Condado Edgar, Rodriguez-Maldonado Abril, Wong-Arambula Claudia, Vazquez-Perez Joel, Martinez Arturo, Boukadida Celia, Munoz-Medina Esteban, Sanchez Alejandro, Isa Pavel, Taboada Blanca, Lopez Susana, Arias Carlos, Barrera-Badillo Gisela, Hernandez-Rivas Lucia, Lopez-Martinez Irma |
| EPI_ISL_412973 | hCoV-19/Italy/CDG1/2020                 | Europe / Italy / Lombardy             | 2020-02-20 | Department of Infectious Diseases, Istituto Superiore di Sanità, Roma , Italy      | Virology Laboratory, Scientific Department, Army Medical Center                                                                     | Paola Stefanelli, Stefano Fiore, Antonella Marchi, Eleonora Benedetti, Concetta Fabiani, Giovanni Faggioni, Antonella Fortunato, Riccardo De Santis, Silvia Fillo, Anna Anselmo, Andrea Ciarmarucioni, Stefano Palomba, Florigio Lista                                                                                                                                     |
| EPI_ISL_412974 | hCoV-19/Italy/SPL1/2020                 | Europe / Italy / Rome                 | 2020-01-29 | Department of Infectious Diseases, Istituto Superiore di Sanità, Rome, Italy       | Virology Laboratory, Scientific Department, Army Medical Center                                                                     | Paola Stefanelli, Stefano Fiore, Antonella Marchi, Eleonora Benedetti, Concetta Fabiani, Giovanni Faggioni, Antonella Fortunato, Silvia Fillo, Riccardo De Santis, Andrea Ciarmarucioni, Giancarlo Petralito, Filippo Molinari, Florigio Lista                                                                                                                             |
| EPI_ISL_412975 | hCoV-19/Australia/NSW05/2020            | Oceania / Australia / New South Wale  | 2020-02-28 | Centre for Infectious Diseases and Microbiology Laboratory Services                | NSW Health Pathology - Institute of Clinical Pathology and Medical Research; Westmead Hospital; University of Sydney                | Eden J-S, Carter I, Rahman H, Holmes EC, Rockett R, O'Sullivan MV, Sintchenko V, Chen SC, Maddocks S, Kok J and Dwyer DE for the 2019-nCoV Study Group                                                                                                                                                                                                                     |
| EPI_ISL_412976 | hCoV-19/batYunnan/RmYN01/2019           | Asia / China / Yunnan / Xishuangbanr  | 2019-06-25 | Shandong First Medical University & Shandong Academy of Medical Sciences           | Institute of Microbiology, Chinese Academy of Sciences                                                                              | Weifeng Shi, Tao Hu, Hong Zhou, Juan Li, Xing Chen, Alice Catherine Hughes, Yuhai Bi                                                                                                                                                                                                                                                                                       |
| EPI_ISL_412977 | hCoV-19/batYunnan/RmYN02/2019           | Asia / China / Yunnan / Xishuangbanr  | 2019-06-25 | Shandong First Medical University & Shandong Academy of Medical Sciences           | Institute of Microbiology, Chinese Academy of Sciences                                                                              | Weifeng Shi, Tao Hu, Hong Zhou, Juan Li, Xing Chen, Alice Catherine Hughes, Yuhai Bi                                                                                                                                                                                                                                                                                       |

|                |                                     |                                       |            |                                                                                                 |                                                                                                                      |                                                                                                                                                                                                                                                                                                                                                                                                                                    |
|----------------|-------------------------------------|---------------------------------------|------------|-------------------------------------------------------------------------------------------------|----------------------------------------------------------------------------------------------------------------------|------------------------------------------------------------------------------------------------------------------------------------------------------------------------------------------------------------------------------------------------------------------------------------------------------------------------------------------------------------------------------------------------------------------------------------|
| EPI_ISL_412978 | hCoV-19/Wuhan/HBCDC-HB-02/2020      | Asia / China / Hubei / Wuhan          | 2020-01-17 | The Central Hospital Of Wuhan                                                                   | Hubei Provincial Center for Disease Control and Prevention                                                           | Bin Fang, Xiang Li, Xiao Yu, Linlin Liu, Bo Yang, Faxian Zhan, Guojun Ye, Xixiang Huo, Junqiang Xu, Bo Yu, Kun Cai, Jing Li, Yongzhong Jiang.                                                                                                                                                                                                                                                                                      |
| EPI_ISL_412979 | hCoV-19/Wuhan/HBCDC-HB-03/2020      | Asia / China / Hubei / Wuhan          | 2020-01-18 | Union Hospital of Tongji Medical College, Huazhong University of Science and Technology         | Hubei Provincial Center for Disease Control and Prevention                                                           | Bin Fang, Xiang Li, Xiao Yu, Linlin Liu, Bo Yang, Faxian Zhan, Guojun Ye, Xixiang Huo, Junqiang Xu, Bo Yu, Kun Cai, Jing Li, Yongzhong Jiang.                                                                                                                                                                                                                                                                                      |
| EPI_ISL_412980 | hCoV-19/Wuhan/HBCDC-HB-04/2020      | Asia / China / Hubei / Wuhan          | 2020-01-18 | Union Hospital of Tongji Medical College, Huazhong University of Science and Technology         | Hubei Provincial Center for Disease Control and Prevention                                                           | Bin Fang, Xiang Li, Xiao Yu, Linlin Liu, Bo Yang, Faxian Zhan, Guojun Ye, Xixiang Huo, Junqiang Xu, Bo Yu, Kun Cai, Jing Li, Yongzhong Jiang.                                                                                                                                                                                                                                                                                      |
| EPI_ISL_412981 | hCoV-19/Wuhan/HBCDC-HB-05/2020      | Asia / China / Hubei / Wuhan          | 2020-01-18 | CR&WISCO GENERAL HOSPITAL                                                                       | Hubei Provincial Center for Disease Control and Prevention                                                           | Bin Fang, Xiang Li, Xiao Yu, Linlin Liu, Bo Yang, Faxian Zhan, Guojun Ye, Xixiang Huo, Junqiang Xu, Bo Yu, Kun Cai, Jing Li, Yongzhong Jiang.                                                                                                                                                                                                                                                                                      |
| EPI_ISL_412982 | hCoV-19/Wuhan/HBCDC-HB-06/2020      | Asia / China / Hubei / Wuhan          | 2020-02-07 | Wuhan Lung Hospital                                                                             | Hubei Provincial Center for Disease Control and Prevention                                                           | Bin Fang, Xiang Li, Xiao Yu, Linlin Liu, Bo Yang, Faxian Zhan, Guojun Ye, Xixiang Huo, Junqiang Xu, Bo Yu, Kun Cai, Jing Li, Yongzhong Jiang.                                                                                                                                                                                                                                                                                      |
| EPI_ISL_412983 | hCoV-19/Tianmen/HBCDC-HB-07/2020    | Asia / China / Hubei / Tianmen        | 2020-02-08 | Tianmen Center for Disease Control and Prevention                                               | Hubei Provincial Center for Disease Control and Prevention                                                           | Bin Fang, Xiang Li, Xiao Yu, Linlin Liu, Bo Yang, Faxian Zhan, Guojun Ye, Xixiang Huo, Junqiang Xu, Bo Yu, Kun Cai, Jing Li, Yongzhong Jiang.                                                                                                                                                                                                                                                                                      |
| EPI_ISL_413014 | hCoV-19/Canada/ON-PHL2445/2020      | North America / Canada / Ontario      | 2020-01-25 | Public Health Ontario Laboratory                                                                | Ontario Agency for Health Protection and Promotion (OAHPP)                                                           | Bin Fang, Xiang Li, Xiao Yu, Linlin Liu, Bo Yang, Faxian Zhan, Guojun Ye, Xixiang Huo, Junqiang Xu, Bo Yu, Kun Cai, Jing Li, YiFa Zhu, Yangyang Tao, Xierong Li, Yongzhong Jiang.                                                                                                                                                                                                                                                  |
| EPI_ISL_413015 | hCoV-19/Canada/ON-VIDO-01/2020      | North America / Canada / Ontario      | 2020-01-23 | Public Health Ontario Laboratory                                                                | National Microbiology Laboratory                                                                                     | Alireza Eshaghi, Samir N Patel, Jonathan B Gubbay, Vanessa G Allen, Christine Frantz, Aimin Li, Sandeep Nagra, Shari Tyson, Anna Majer, Erika Landry, Morag Graham, Grace Seo, Philip Mabon, Natalie Knox, Adrian Zetner, Samira Mubareka, Rob Kozak, Jocelyne Lew, Darryl Falzarano, Gerds Volker, Jonathan Gubbay, Stephanie Booth, Guillaume Poliquin, Tom Graefenhan, Matthew Gilmore, Nathalie Bastien, Yan Li, Timothy Booth |
| EPI_ISL_413016 | hCoV-19/Brazil/SPBR-02/2020         | South America / Brazil / Sao Paulo    | 2020-02-28 | Hospital Israelita Albert Einstein                                                              | Instituto Adolfo Lutz, Interdisciplinary Procedures Center, Strategic Laboratory                                     | Jaqueline Goes de Jesus, Claudio Tavares Sacchi, Fabiana Cristina Pereira dos Santos, Ingra Morales Claro, Flávia Cristina da Silva Sales, Claudia Regina Gonçalves, Joshua Quick, Maria do Carmo Sampaio Tavares Timenetsky, Nicholas James Loman, Andrew Rambaut, Ester Cerdeira Sabino, Nuno Rodrigues Faria                                                                                                                    |
| EPI_ISL_413017 | hCoV-19/South Korea/KUMC01/2020     | Asia / South Korea                    | 2020-02-06 | Department of Microbiology, Institute for Viral Diseases, College of Medicine, Korea University | Department of Microbiology, Institute for Viral Diseases, College of Medicine, Korea University                      | Changmin Kang, Joon-Yong Bae, Jungmin Lee, Heedo Park, Juyoung Cho, Jeonghun Kim, Gee eun Lee, Cui Chunguang, Kyeong-ryeol Shin, Dong Min Kim, Jin Il Kim, Man-Seong Park                                                                                                                                                                                                                                                          |
| EPI_ISL_413018 | hCoV-19/South Korea/KUMC02/2020     | Asia / South Korea                    | 2020-02-06 | Department of Microbiology, Institute for Viral Diseases, College of Medicine, Korea University | Department of Microbiology, Institute for Viral Diseases, College of Medicine, Korea University                      | Changmin Kang, Joon-Yong Bae, Jungmin Lee, Heedo Park, Juyoung Cho, Jeonghun Kim, Gee eun Lee, Cui Chunguang, Kyeong-ryeol Shin, Dong Min Kim, Jin Il Kim, Man-Seong Park                                                                                                                                                                                                                                                          |
| EPI_ISL_413019 | hCoV-19/Switzerland/1000477102/2020 | Europe / Switzerland / Zurich         | 2020-02-26 | Department of Internal Medicine, Triemli Hospital                                               | Institute of Medical Virology, University of Zurich                                                                  | Stefan Schmutz, Maryam Zaheri, Verena Kufner, Patrick Redli, Fiona Steiner, Jon Huder, Riccarda Capaul, Andrea Zbinden, Jürg Böni, Michael Huber, Gerhard Eich, Alexandra Trkola                                                                                                                                                                                                                                                   |
| EPI_ISL_413020 | hCoV-19/Switzerland/1000477377/2020 | Europe / Switzerland / Zurich         | 2020-02-27 | Department of Internal Medicine, Triemli Hospital                                               | Institute of Medical Virology, University of Zurich                                                                  | Stefan Schmutz, Maryam Zaheri, Verena Kufner, Patrick Redli, Fiona Steiner, Jon Huder, Riccarda Capaul, Andrea Zbinden, Jürg Böni, Michael Huber, Gerhard Eich, Alexandra Trkola                                                                                                                                                                                                                                                   |
| EPI_ISL_413021 | hCoV-19/Switzerland/1000477757/2020 | Europe / Switzerland / Zurich         | 2020-02-29 | Klinik Hirslanden Zurich                                                                        | Institute of Medical Virology, University of Zurich                                                                  | Stefan Schmutz, Maryam Zaheri, Verena Kufner, Gabriela Ziltener, Patrick Redli, Fiona Steiner, Jon Huder, Riccarda Capaul, Andrea Zbinden, Jürg Böni, Michael Huber, Christian Ruef, Alexandra Trkola                                                                                                                                                                                                                              |
| EPI_ISL_413022 | hCoV-19/Switzerland/1000477796/2020 | Europe / Switzerland / Zurich         | 2020-02-29 | Division of Infectious Diseases, University Hospital Zurich                                     | Institute of Medical Virology, University of Zurich                                                                  | Stefan Schmutz, Maryam Zaheri, Verena Kufner, Gabriela Ziltener, Patrick Redli, Fiona Steiner, Jon Huder, Riccarda Capaul, Andrea Zbinden, Jürg Böni, Michael Huber, Roberto Speck, Alexandra Trkola                                                                                                                                                                                                                               |
| EPI_ISL_413023 | hCoV-19/Switzerland/1000477797/2020 | Europe / Switzerland / Zurich         | 2020-02-29 | Division of Infectious Diseases, University Hospital Zurich                                     | Institute of Medical Virology, University of Zurich                                                                  | Stefan Schmutz, Maryam Zaheri, Verena Kufner, Gabriela Ziltener, Patrick Redli, Fiona Steiner, Jon Huder, Riccarda Capaul, Andrea Zbinden, Jürg Böni, Michael Huber, Roberto Speck, Alexandra Trkola                                                                                                                                                                                                                               |
| EPI_ISL_413024 | hCoV-19/Switzerland/1000477806/2020 | Europe / Switzerland / Zurich         | 2020-02-29 | Division of Infectious Diseases, University Hospital Zurich                                     | Institute of Medical Virology, University of Zurich                                                                  | Stefan Schmutz, Maryam Zaheri, Verena Kufner, Gabriela Ziltener, Patrick Redli, Fiona Steiner, Jon Huder, Riccarda Capaul, Andrea Zbinden, Jürg Böni, Michael Huber, Roberto Speck, Alexandra Trkola                                                                                                                                                                                                                               |
| EPI_ISL_413025 | hCoV-19/USA/WA3-UW1/2020            | North America / USA / Washington      | 2020-02-27 | Harborview Medical Center                                                                       | UW Virology Lab                                                                                                      | Pavitra Roychoudhury, Arun Nalla, Hong Xie, Keith Jerome, Alexander Greninger                                                                                                                                                                                                                                                                                                                                                      |
| EPI_ISL_413213 | hCoV-19/Australia/NSW06/2020        | Oceania / Australia / New South Wales | 2020-02-29 | Centre for Infectious Diseases and Microbiology Laboratory Services                             | NSW Health Pathology - Institute of Clinical Pathology and Medical Research; Westmead Hospital; University of Sydney | Eden J-S, Carter I, Rahman H, Holmes EC, Rockett R, O'Sullivan MV, Sintchenko V, Chen SC, Maddocks S, Kok J and Dwyer DE for the 2019-nCoV Study Group*                                                                                                                                                                                                                                                                            |
| EPI_ISL_413214 | hCoV-19/Australia/NSW07/2020        | Oceania / Australia / New South Wales | 2020-02-29 | Centre for Infectious Diseases and Microbiology Laboratory Services                             | NSW Health Pathology - Institute of Clinical Pathology and Medical Research; Westmead Hospital; University of Sydney | Eden J-S, Carter I, Rahman H, Holmes EC, Rockett R, O'Sullivan MV, Sintchenko V, Chen SC, Maddocks S, Kok J and Dwyer DE for the 2019-nCoV Study Group*                                                                                                                                                                                                                                                                            |
| EPI_ISL_413219 | hCoV-19/Indonesia/NIHRD-N206/2020   | Asia / Indonesia / West Java / Indram | 2020-03-02 | National Institute of Health Research and Development                                           | National Institute of Health Research and Development                                                                | Setiawaty,V; Subangkit; Pawestri,HA; Puspa,KD; Ikawati,HD; Nugraha,AA; Hariastuti,NI; Ramadhani,R; Susilarini,NK; Pratiwi,E; Agustiniingsih; Kurniawati,J; Siswanto                                                                                                                                                                                                                                                                |
| EPI_ISL_413221 | hCoV-19/Scotland/CVR01/2020         | Europe / United Kingdom / Scotland    | 2020-03-02 | West of Scotland Specialist Virology Centre, NHSGGC                                             | MRC-University of Glasgow Centre for Virus Research                                                                  | Emma Thomson, Antonia Ho; James Shephard, Shirin Ashraf; Kathy Smollett, Daniel Mair, Stephen Carmichael, Ana da Silva Filipe; Richard Orton, Josh Singer, David L Robertson; Andrew Rambaut; Alasdair MacLean, Rory Gunson.                                                                                                                                                                                                       |
| EPI_ISL_413455 | hCoV-19/USA/WA4-UW2/2020            | North America / USA / Washington      | 2020-02-28 | Washington State Public Health Lab                                                              | University of Washington Virology Lab                                                                                | Pavitra Roychoudhury, Arun Nalla, Hong Xie, Keith Jerome, Alexander Greninger                                                                                                                                                                                                                                                                                                                                                      |
| EPI_ISL_413456 | hCoV-19/USA/WA-S2/2020              | North America / USA / Washington      | 2020-02-20 | Seattle Flu Study                                                                               | Seattle Flu Study                                                                                                    | Chu et al                                                                                                                                                                                                                                                                                                                                                                                                                          |
| EPI_ISL_413457 | hCoV-19/USA/WA6-UW3/2020            | North America / USA / Washington      | 2020-02-29 | Washington State Public Health Lab                                                              | UW Virology Lab                                                                                                      | Pavitra Roychoudhury, Arun Nalla, Hong Xie, Keith Jerome, Alexander Greninger                                                                                                                                                                                                                                                                                                                                                      |
| EPI_ISL_413458 | hCoV-19/USA/WA7-UW4/2020            | North America / USA / Washington      | 2020-03-01 | Washington State Public Health Lab                                                              | UW Virology Lab                                                                                                      | Pavitra Roychoudhury, Arun Nalla, Hong Xie, Keith Jerome, Alexander Greninger                                                                                                                                                                                                                                                                                                                                                      |

|                |                                   |                                    |            |                                                                                                                                                                                                                     |                                                                                                                            |                                                                                                                                                                                                                                                                            |
|----------------|-----------------------------------|------------------------------------|------------|---------------------------------------------------------------------------------------------------------------------------------------------------------------------------------------------------------------------|----------------------------------------------------------------------------------------------------------------------------|----------------------------------------------------------------------------------------------------------------------------------------------------------------------------------------------------------------------------------------------------------------------------|
| EPI_ISL_413459 | hCoV-19/Japan/TK-20-31-3/2020     | Asia / Japan / Tokyo               | 2020-02-20 | Department of Pathology, Toshima Hospital                                                                                                                                                                           | Pathogen Genomics Center, National Institute of Infectious Diseases                                                        | Tsuyoshi Sekizuka, Kentaro Itokawa, Takuya Adachi, Masahiro Sano, Jun Yamazaki, Ippei Miyamoto, Haruka Nishioka, Ja-Mun Chong, Noriko Nakajima, Yuko Sato, Minoru Tobiume, Harutaka Katano, Tadaki Suzuki, Makoto Kuroda                                                   |
| EPI_ISL_413485 | hCoV-19/Anhui/SZ005/2020          | Asia / China / Anhui / Suzhou      | 2020-01-24 | Department of microbiology laboratory, Anhui Provincial Center for Disease Control and Prevention                                                                                                                   | Department of microbiology laboratory, Anhui Provincial Center for Disease Control and Prevention                          | Weiwai Li, Jun He, Yong Sun, Junling Yu, Qingqing Chen, Yuan Yuan, Yonglin Shi, Zhuhui Zhang, Yinglu Ge, Weidong Li, Bin Su, Zhirong Liu                                                                                                                                   |
| EPI_ISL_413486 | hCoV-19/USA/WA8-UW5/2020          | North America / USA / Washington   | 2020-03-01 | Valley Medical Center                                                                                                                                                                                               | University of Washington Virology Lab                                                                                      | Pavitra Roychoudhury, Arun Nalla, Hong Xie, Keith Jerome, Alexander Greninger                                                                                                                                                                                              |
| EPI_ISL_413487 | hCoV-19/USA/WA9-UW6/2020          | North America / USA / Washington   | 2020-03-01 | Harborview Medical Center                                                                                                                                                                                           | University of Washington Virology Lab                                                                                      | Pavitra Roychoudhury, Arun Nalla, Hong Xie, Keith Jerome, Alexander Greninger                                                                                                                                                                                              |
| EPI_ISL_413488 | hCoV-19/Germany/NRW-01/2020       | Europe / Germany / North Rhine Wes | 2020-02-28 | Center of Medical Microbiology, Virology, and Hospital Hygiene, University of Duesseldorf                                                                                                                           | Center of Medical Microbiology, Virology, and Hospital Hygiene, University of Duesseldorf                                  | Ortwin Adams, Marcel Andree, Alexander Dilthey, Torsten Feldt, Sandra Hauka, Torsten Houwaart, Björn-Erik Jensen, Detlef Kindgen-Milles, Malte Kohns                                                                                                                       |
| EPI_ISL_413489 | hCoV-19/Italy/UniSR1/2020         | Europe / Italy / Lombardy / Milan  | 2020-03-03 | Laboratorio di Microbiologia e Virologia, Università Vita-Salute San Raffaele, Milano                                                                                                                               | Laboratorio di Microbiologia e Virologia, Università Vita-Salute San Raffaele, Milano                                      | Vasconcelos, Klaus Pfeffer, Tina Senff, Daniel Strelow, Jörg Timm, Andreas Walker, Tobias Wiernemann                                                                                                                                                                       |
| EPI_ISL_413490 | hCoV-19/New Zealand/01/2020       | Oceania / New Zealand / Auckland   | 2020-02-27 | Auckland Hospital                                                                                                                                                                                                   | Institute of Environmental Science and Research (ESR)                                                                      | R.A Diotti, E. Criscuolo, M. Castelli, V. Caputo, R. Ferrarese, M. Sampaolo, E. Boeri, I. Negri, V. Amato, G. Lo Raso, C. Di Resta, R. Burioni, M. Clementi, N. Mancini & N. Clementi                                                                                      |
| EPI_ISL_413491 | hCoV-19/Hong Kong/VM20002493/2020 | Asia / Hong Kong                   | 2020-02-09 | Princess Margaret Hospital                                                                                                                                                                                          | Hong Kong Department of Health                                                                                             | Matt Storey, Xiaoyun Ren, Gary McAuliffe, Sally Roberts, Matthew Blakiston, Erasmus Smit, Lauren Jelly, Joep de Ligt                                                                                                                                                       |
| EPI_ISL_413492 | hCoV-19/Hong Kong/VM20002509/2020 | Asia / Hong Kong                   | 2020-02-10 | Queen Mary Hospital                                                                                                                                                                                                 | Hong Kong Department of Health                                                                                             | Mak Gannon C.K., Cheng Peter K.C., Lam Edman T.K., Chan Rickjason C.W., Tsang Dominic N.C.                                                                                                                                                                                 |
| EPI_ISL_413493 | hCoV-19/Hong Kong/VM20002507/2020 | Asia / Hong Kong                   | 2020-02-10 | Princess Margaret Hospital                                                                                                                                                                                          | Hong Kong Department of Health                                                                                             | Mak Gannon C.K., Cheng Peter K.C., Lam Edman T.K., Chan Rickjason C.W., Tsang Dominic N.C.                                                                                                                                                                                 |
| EPI_ISL_413494 | hCoV-19/Hong Kong/VM20002508/2020 | Asia / Hong Kong                   | 2020-02-10 | Princess Margaret Hospital                                                                                                                                                                                          | Hong Kong Department of Health                                                                                             | Mak Gannon C.K., Cheng Peter K.C., Lam Edman T.K., Chan Rickjason C.W., Tsang Dominic N.C.                                                                                                                                                                                 |
| EPI_ISL_413495 | hCoV-19/Hong Kong/VM20002582/2020 | Asia / Hong Kong                   | 2020-02-12 | Ruttonjee Hospital                                                                                                                                                                                                  | Hong Kong Department of Health                                                                                             | Mak Gannon C.K., Cheng Peter K.C., Lam Edman T.K., Chan Rickjason C.W., Tsang Dominic N.C.                                                                                                                                                                                 |
| EPI_ISL_413496 | hCoV-19/Hong Kong/VM20002581/2020 | Asia / Hong Kong                   | 2020-02-13 | Ruttonjee Hospital                                                                                                                                                                                                  | Hong Kong Department of Health                                                                                             | Mak Gannon C.K., Cheng Peter K.C., Lam Edman T.K., Chan Rickjason C.W., Tsang Dominic N.C.                                                                                                                                                                                 |
| EPI_ISL_413497 | hCoV-19/Hong Kong/VM20002588/2020 | Asia / Hong Kong                   | 2020-02-13 | Ruttonjee Hospital                                                                                                                                                                                                  | Hong Kong Department of Health                                                                                             | Mak Gannon C.K., Cheng Peter K.C., Lam Edman T.K., Chan Rickjason C.W., Tsang Dominic N.C.                                                                                                                                                                                 |
| EPI_ISL_413498 | hCoV-19/Hong Kong/VM20002663/2020 | Asia / Hong Kong                   | 2020-02-17 | Pamela Youde Nethersole Eastern Hospital                                                                                                                                                                            | Hong Kong Department of Health                                                                                             | Mak Gannon C.K., Cheng Peter K.C., Lam Edman T.K., Chan Rickjason C.W., Tsang Dominic N.C.                                                                                                                                                                                 |
| EPI_ISL_413513 | hCoV-19/South Korea/KUMC03/2020   | Asia / South Korea                 | 2020-02-27 | Division of Infectious Diseases, Department of Internal Medicine, Korea University College of Medicine                                                                                                              | Department of Microbiology, Institute for Viral Diseases, College of Medicine, Korea University                            | Changmin Kang, Joon-Yong Bae, Jungmin Lee, Jin Gu Yoon, Heedo Park, Juyoung Cho, Jeonghun Kim, Gee Eun Lee, Cui Chunguang, Kyeong-ryeol Shin, Ji Yun Noh, Joon Young Song, Hee Jin Cheung, Woo Joo Kim, Jin Il Kim, Man-Seong Park                                         |
| EPI_ISL_413514 | hCoV-19/South Korea/KUMC04/2020   | Asia / South Korea                 | 2020-02-27 | Department of Microbiology, Institute for Viral Diseases, College of Medicine, Korea University                                                                                                                     | Department of Microbiology, Institute for Viral Diseases, College of Medicine, Korea University                            | Changmin Kang, Joon-Yong Bae, Jungmin Lee, Jin Gu Yoon, Heedo Park, Juyoung Cho, Jeonghun Kim, Gee Eun Lee, Cui Chunguang, Kyeong-ryeol Shin, Ji Yun Noh, Joon Young Song, Hee Jin Cheung, Woo Joo Kim, Jin Il Kim, Man-Seong Park                                         |
| EPI_ISL_413515 | hCoV-19/South Korea/KUMC05/2020   | Asia / South Korea                 | 2020-02-27 | Division of Infectious Diseases, Department of Internal Medicine, Korea University College of Medicine                                                                                                              | Department of Microbiology, Institute for Viral Diseases, College of Medicine, Korea University                            | Changmin Kang, Joon-Yong Bae, Jungmin Lee, Jin Gu Yoon, Heedo Park, Juyoung Cho, Jeonghun Kim, Gee Eun Lee, Cui Chunguang, Kyeong-ryeol Shin, Ji Yun Noh, Joon Young Song, Hee Jin Cheung, Woo Joo Kim, Jin Il Kim, Man-Seong Park                                         |
| EPI_ISL_413516 | hCoV-19/South Korea/KUMC06/2020   | Asia / South Korea                 | 2020-02-27 | Department of Microbiology, Institute for Viral Diseases, College of Medicine, Korea University                                                                                                                     | Department of Microbiology, Institute for Viral Diseases, College of Medicine, Korea University                            | Changmin Kang, Joon-Yong Bae, Jungmin Lee, Jin Gu Yoon, Heedo Park, Juyoung Cho, Jeonghun Kim, Gee Eun Lee, Cui Chunguang, Kyeong-ryeol Shin, Ji Yun Noh, Joon Young Song, Hee Jin Cheung, Woo Joo Kim, Jin Il Kim, Man-Seong Park                                         |
| EPI_ISL_413517 | hCoV-19/Iran/MHKN-1/2020          | Asia / Iran                        | 2020-02-26 | unknown                                                                                                                                                                                                             | Gastrointestinal and Liver Diseases Research Center                                                                        | Karbalaie Niya, M.H., Laali, A., Tabibzadeh, A., Safarnezhad Tameshkel, F., Zamani, F., Sohrabi, M.R., Ranjbar, M., Savaj, S., Rezaie, N., Ajdarkosh, H., Keyvani, H., Khoonsari, M., Ameli, M., Nikkhal, M., Zhanbari, B., Faraji, A., Jamshidi Makiani, M. and Roham, M. |
| EPI_ISL_413518 | hCoV-19/Beijing/105/2020          | Asia / China / Beijing             | 2020-01-26 | unknown                                                                                                                                                                                                             | Infectious Disease Control Center                                                                                          | Li, J., Li, L., Li, Z., Qiu, S., Song, H., Li, P. and Li, P.                                                                                                                                                                                                               |
| EPI_ISL_413519 | hCoV-19/Beijing/231/2020          | Asia / China / Beijing             | 2020-01-28 | unknown                                                                                                                                                                                                             | Infectious Disease Control Center                                                                                          | Li, J., Li, L., Li, Z., Qiu, S., Song, H., Li, P. and Li, P.                                                                                                                                                                                                               |
| EPI_ISL_413520 | hCoV-19/Beijing/233/2020          | Asia / China / Beijing             | 2020-01-28 | unknown                                                                                                                                                                                                             | Infectious Disease Control Center                                                                                          | Li, J., Li, L., Li, Z., Qiu, S., Song, H., Li, P. and Li, P.                                                                                                                                                                                                               |
| EPI_ISL_413521 | hCoV-19/Beijing/235/2020          | Asia / China / Beijing             | 2020-01-28 | unknown                                                                                                                                                                                                             | Infectious Disease Control Center                                                                                          | Li, J., Li, L., Li, Z., Qiu, S., Song, H., Li, P. and Li, P.                                                                                                                                                                                                               |
| EPI_ISL_413522 | hCoV-19/India/1-27/2020           | Asia / India / Kerala              | 2020-01-27 | Indian Council of Medical Research - National Institute of Virology                                                                                                                                                 | National Influenza Center, Indian Council of Medical Research - National Institute of Virology                             | Potdar V, Yadav PD, Choudhary ML, Shete-Aich A                                                                                                                                                                                                                             |
| EPI_ISL_413523 | hCoV-19/India/1-31/2020           | Asia / India / Kerala              | 2020-01-31 | Indian Council of Medical Research-National Institute of Virology                                                                                                                                                   | National Influenza Center, Indian Council of Medical Research-National Institute of Virology                               | Potdar V, Yadav PD, Choudhary ML, Shete-Aich A                                                                                                                                                                                                                             |
| EPI_ISL_413550 | hCoV-19/Nigeria/Lagos01/2020      | Africa / Nigeria / Lagos           | 2020-02-27 | Centre for Human and Zoonotic Virology (CHAZVY), College of Medicine University of Lagos/Lagos University Teaching Hospital (LUTH), part of the Laboratory Network of the Nigeria Centre for Disease Control (NCDC) | African Centre of Excellence for Genomics of Infectious Diseases (ACEGID), Redeemer's University, Ede, Osun State, Nigeria | Oluniyi P.E., Ajogbasile F.V., Kayode A., Oguzie J., Folarin O.A., Ihekweazu C. Happi C.T.                                                                                                                                                                                 |
| EPI_ISL_413553 | hCoV-19/Iran/Tehran15AW/2020      | Asia / Iran / Tehran               | 2020-02-28 | Iran National Influenza Center                                                                                                                                                                                      | Iran National Influenza Center                                                                                             | Jila Yavarian, Nazanin Zahra Shafiei Jandaghi, Kaveh Sadeghi, Fatemeh Ajaminejad, Nastaran Ghavvami and Talat Mokhtari Azad                                                                                                                                                |
| EPI_ISL_413554 | hCoV-19/Iran/Tehran9BE/2020       | Asia / Iran / Tehran               | 2020-02-23 | Iran National Influenza Center                                                                                                                                                                                      | Iran National Influenza Center                                                                                             | Jila Yavarian, Nazanin Zahra Shafiei Jandaghi, Kaveh Sadeghi, Nastaran Ghavvami, Fatemeh Ajami Nejad, Fatemeh Saadatmand and Talat Mokhtari Azad                                                                                                                           |

|                |                                             |                                       |            |                                        |                                                          |                                                                                                                                                                                                                                                                                                                                                                                                                                   |
|----------------|---------------------------------------------|---------------------------------------|------------|----------------------------------------|----------------------------------------------------------|-----------------------------------------------------------------------------------------------------------------------------------------------------------------------------------------------------------------------------------------------------------------------------------------------------------------------------------------------------------------------------------------------------------------------------------|
| EPI_ISL_413555 | hCoV-19/Wales/PHW1/2020                     | Europe / United Kingdom / Wales       | 2020-02-27 | Wales Specialist Virology Centre       | Public Health Wales Microbiology Cardiff                 | Catherine Moore, Cen Sabu, Joanne Watkins, Sally Corden, Tom Connor                                                                                                                                                                                                                                                                                                                                                               |
| EPI_ISL_413556 | hCoV-19/Wales/PHW2/2020                     | Europe / United Kingdom / Wales       | 2020-03-04 | Wales Specialist Virology Centre       | Public Health Wales Microbiology Cardiff                 | Catherine Moore, Tim Jones, Joanne Watkins, Sally Corden, Tom Connor                                                                                                                                                                                                                                                                                                                                                              |
| EPI_ISL_413557 | hCoV-19/USA/CA-CDPH-UC1/2020                | North America / USA / California / So | 2020-02-28 | California Department of Public Health | Chiu Laboratory, University of California, San Francisco | Xianding Deng, Scot Federman, Chao-Yang Pan, Hugo Guevara, Wei Gu, Debra A. Wadford, and Charles Y. Chiu                                                                                                                                                                                                                                                                                                                          |
| EPI_ISL_413558 | hCoV-19/USA/CA-CDPH-UC2/2020                | North America / USA / California / So | 2020-02-27 | California Department of Public Health | Chiu Laboratory, University of California, San Francisco | Xianding Deng, Scot Federman, Chao-Yang Pan, Hugo Guevara, Wei Gu, Debra A. Wadford, and Charles Y. Chiu                                                                                                                                                                                                                                                                                                                          |
| EPI_ISL_413559 | hCoV-19/USA/CA-CDPH-UC3/2020                | North America / USA / California / So | 2020-02-27 | California Department of Public Health | Chiu Laboratory, University of California, San Francisco | Xianding Deng, Scot Federman, Chao-Yang Pan, Hugo Guevara, Wei Gu, Debra A. Wadford, and Charles Y. Chiu                                                                                                                                                                                                                                                                                                                          |
| EPI_ISL_413560 | hCoV-19/USA/WA-S3/2020                      | North America / USA / Washington      | 2020-02-28 | Seattle Flu Study                      | UW Virology Lab                                          | Chu et al                                                                                                                                                                                                                                                                                                                                                                                                                         |
| EPI_ISL_413561 | hCoV-19/USA/CA-CDPH-UC4/2020                | North America / USA / California / So | 2020-02-27 | California Department of Public Health | Chiu Laboratory, University of California, San Francisco | Xianding Deng, Scot Federman, Chao-Yang Pan, Hugo Guevara, Wei Gu, Debra A. Wadford, and Charles Y. Chiu                                                                                                                                                                                                                                                                                                                          |
| EPI_ISL_413562 | hCoV-19/USA/WA11-UW7/2020                   | North America / USA / Washington      | 2020-03-02 | UW Virology Lab                        | UW Virology Lab                                          | Pavitra Roychoudhury, Hong Xie, Keith Jerome, Alexander Greninger                                                                                                                                                                                                                                                                                                                                                                 |
| EPI_ISL_413563 | hCoV-19/USA/WA12-UW8/2020                   | North America / USA / Washington      | 2020-03-03 | UW Virology Lab                        | UW Virology Lab                                          | Pavitra Roychoudhury, Hong Xie, Keith Jerome, Alexander Greninger                                                                                                                                                                                                                                                                                                                                                                 |
| EPI_ISL_413564 | hCoV-19/Netherlands/Andel_1365066/2020      | Europe / Netherlands / Andel          | 2020-03-01 | MHC West-Brabant                       | Erasmus Medical Center                                   | David Nieuwenhuijse, Bas Oude Munnink, Reina Sikkema, Claudia Schapendonk, Irina Chestakova, Anne van der Linden, Mark Pronk, Pascal Lexmond, Corien Swaan, Manon Haverkate, Madelief Mollers, Mart Stein, Sandra Kengne Kamga Mobou, Jeroen van Kampen, Jolanda Voermans, Aura Timen, Corine GeurtsvanKessel, Annetiek van der Eijk, Richard Molenkamp, Marion Koopmans, on behalf of the Dutch national COVID-19 response team. |
| EPI_ISL_413565 | hCoV-19/Netherlands/Berlicum_1363564/2020   | Europe / Netherlands / Berlicum       | 2020-02-24 | Foundation Pamm                        | Erasmus Medical Center                                   | David Nieuwenhuijse, Bas Oude Munnink, Reina Sikkema, Claudia Schapendonk, Irina Chestakova, Anne van der Linden, Mark Pronk, Pascal Lexmond, Corien Swaan, Manon Haverkate, Madelief Mollers, Mart Stein, Sandra Kengne Kamga Mobou, Jeroen van Kampen, Jolanda Voermans, Aura Timen, Corine GeurtsvanKessel, Annetiek van der Eijk, Richard Molenkamp, Marion Koopmans, on behalf of the Dutch national COVID-19 response team. |
| EPI_ISL_413566 | hCoV-19/Netherlands/Blicaricum_1364780/2020 | Europe / Netherlands / Blicaricum     | 2020-03-02 | MHC Gooi & Vechtstreek                 | Erasmus Medical Center                                   | David Nieuwenhuijse, Bas Oude Munnink, Reina Sikkema, Claudia Schapendonk, Irina Chestakova, Anne van der Linden, Mark Pronk, Pascal Lexmond, Corien Swaan, Manon Haverkate, Madelief Mollers, Mart Stein, Sandra Kengne Kamga Mobou, Jeroen van Kampen, Jolanda Voermans, Aura Timen, Corine GeurtsvanKessel, Annetiek van der Eijk, Richard Molenkamp, Marion Koopmans, on behalf of the Dutch national COVID-19 response team. |
| EPI_ISL_413567 | hCoV-19/Netherlands/Coevorden_1363618/2020  | Europe / Netherlands / Coevorden      | 2020       | Unknown                                | Erasmus Medical Center                                   | David Nieuwenhuijse, Bas Oude Munnink, Reina Sikkema, Claudia Schapendonk, Irina Chestakova, Anne van der Linden, Mark Pronk, Pascal Lexmond, Corien Swaan, Manon Haverkate, Madelief Mollers, Mart Stein, Sandra Kengne Kamga Mobou, Jeroen van Kampen, Jolanda Voermans, Aura Timen, Corine GeurtsvanKessel, Annetiek van der Eijk, Richard Molenkamp, Marion Koopmans, on behalf of the Dutch national COVID-19 response team. |
| EPI_ISL_413568 | hCoV-19/Netherlands/Dalen_1363624/2020      | Europe / Netherlands / Dalen          | 2020-03-01 | MHC Drente                             | Erasmus Medical Center                                   | David Nieuwenhuijse, Bas Oude Munnink, Reina Sikkema, Claudia Schapendonk, Irina Chestakova, Anne van der Linden, Mark Pronk, Pascal Lexmond, Corien Swaan, Manon Haverkate, Madelief Mollers, Mart Stein, Sandra Kengne Kamga Mobou, Jeroen van Kampen, Jolanda Voermans, Aura Timen, Corine GeurtsvanKessel, Annetiek van der Eijk, Richard Molenkamp, Marion Koopmans, on behalf of the Dutch national COVID-19 response team. |
| EPI_ISL_413569 | hCoV-19/Netherlands/Delft_1363424/2020      | Europe / Netherlands / Delft          | 2020-02-28 | RIVM                                   | Erasmus Medical Center                                   | David Nieuwenhuijse, Bas Oude Munnink, Reina Sikkema, Claudia Schapendonk, Irina Chestakova, Anne van der Linden, Mark Pronk, Pascal Lexmond, Corien Swaan, Manon Haverkate, Madelief Mollers, Mart Stein, Sandra Kengne Kamga Mobou, Jeroen van Kampen, Jolanda Voermans, Aura Timen, Corine GeurtsvanKessel, Annetiek van der Eijk, Richard Molenkamp, Marion Koopmans, on behalf of the Dutch national COVID-19 response team. |
| EPI_ISL_413570 | hCoV-19/Netherlands/Diemen_1363454/2020     | Europe / Netherlands / Diemen         | 2020-02-28 | RIVM                                   | Erasmus Medical Center                                   | David Nieuwenhuijse, Bas Oude Munnink, Reina Sikkema, Claudia Schapendonk, Irina Chestakova, Anne van der Linden, Mark Pronk, Pascal Lexmond, Corien Swaan, Manon Haverkate, Madelief Mollers, Mart Stein, Sandra Kengne Kamga Mobou, Jeroen van Kampen, Jolanda Voermans, Aura Timen, Corine GeurtsvanKessel, Annetiek van der Eijk, Richard Molenkamp, Marion Koopmans, on behalf of the Dutch national COVID-19 response team. |
| EPI_ISL_413571 | hCoV-19/Netherlands/Eindhoven_1363782/2020  | Europe / Netherlands / Eindhoven      | 2020-03-02 | MHC Brabant Zuidoost                   | Erasmus Medical Center                                   | David Nieuwenhuijse, Bas Oude Munnink, Reina Sikkema, Claudia Schapendonk, Irina Chestakova, Anne van der Linden, Mark Pronk, Pascal Lexmond, Corien Swaan, Manon Haverkate, Madelief Mollers, Mart Stein, Sandra Kengne Kamga Mobou, Jeroen van Kampen, Jolanda Voermans, Aura Timen, Corine GeurtsvanKessel, Annetiek van der Eijk, Richard Molenkamp, Marion Koopmans, on behalf of the Dutch national COVID-19 response team. |

|                |                                              |                                      |            |                                             |                        |                                                                                                                                                                                                                                                                                                                                                                                                                                   |
|----------------|----------------------------------------------|--------------------------------------|------------|---------------------------------------------|------------------------|-----------------------------------------------------------------------------------------------------------------------------------------------------------------------------------------------------------------------------------------------------------------------------------------------------------------------------------------------------------------------------------------------------------------------------------|
| EPI_ISL_413572 | hCoV-19/Netherlands/Haarlem_1363688/2020     | Europe / Netherlands / Haarlem       | 2020-03-01 | MHC Kennemerland                            | Erasmus Medical Center | David Nieuwenhuijse, Bas Oude Munnink, Reina Sikkema, Claudia Schapendonk, Irina Chestakova, Anne van der Linden, Mark Pronk, Pascal Lexmond, Corien Swaan, Manon Haverkate, Madelief Mollers, Mart Stein, Sandra Kengne Kamga Mobou, Jeroen van Kampen, Jolanda Voermans, Aura Timen, Corine GeurtsvanKessel, Annemiek van der Eijk, Richard Molenkamp, Marion Koopmans, on behalf of the Dutch national COVID-19 response team. |
| EPI_ISL_413573 | hCoV-19/Netherlands/Hardinxveld_Giessend     | Europe / Netherlands / Hardinxveld G | 2020-03-02 | Dienst Gezondheid & Jeugd Zuid-Holland Zuid | Erasmus Medical Center | David Nieuwenhuijse, Bas Oude Munnink, Reina Sikkema, Claudia Schapendonk, Irina Chestakova, Anne van der Linden, Mark Pronk, Pascal Lexmond, Corien Swaan, Manon Haverkate, Madelief Mollers, Mart Stein, Sandra Kengne Kamga Mobou, Jeroen van Kampen, Jolanda Voermans, Aura Timen, Corine GeurtsvanKessel, Annemiek van der Eijk, Richard Molenkamp, Marion Koopmans, on behalf of the Dutch national COVID-19 response team. |
| EPI_ISL_413574 | hCoV-19/Netherlands/Helmond_1363548/2020     | Europe / Netherlands / Helmond       | 2020-02-29 | MHC West-Brabant                            | Erasmus Medical Center | David Nieuwenhuijse, Bas Oude Munnink, Reina Sikkema, Claudia Schapendonk, Irina Chestakova, Anne van der Linden, Mark Pronk, Pascal Lexmond, Corien Swaan, Manon Haverkate, Madelief Mollers, Mart Stein, Sandra Kengne Kamga Mobou, Jeroen van Kampen, Jolanda Voermans, Aura Timen, Corine GeurtsvanKessel, Annemiek van der Eijk, Richard Molenkamp, Marion Koopmans, on behalf of the Dutch national COVID-19 response team. |
| EPI_ISL_413575 | hCoV-19/Netherlands/Houten_1363498/2020      | Europe / Netherlands / Houten        | 2020-02-29 | RIVM                                        | Erasmus Medical Center | David Nieuwenhuijse, Bas Oude Munnink, Reina Sikkema, Claudia Schapendonk, Irina Chestakova, Anne van der Linden, Mark Pronk, Pascal Lexmond, Corien Swaan, Manon Haverkate, Madelief Mollers, Mart Stein, Sandra Kengne Kamga Mobou, Jeroen van Kampen, Jolanda Voermans, Aura Timen, Corine GeurtsvanKessel, Annemiek van der Eijk, Richard Molenkamp, Marion Koopmans, on behalf of the Dutch national COVID-19 response team. |
| EPI_ISL_413576 | hCoV-19/Netherlands/Loon_op_zand_136351      | Europe / Netherlands / Loon op zand  | 2020-02-29 | RIVM                                        | Erasmus Medical Center | David Nieuwenhuijse, Bas Oude Munnink, Reina Sikkema, Claudia Schapendonk, Irina Chestakova, Anne van der Linden, Mark Pronk, Pascal Lexmond, Corien Swaan, Manon Haverkate, Madelief Mollers, Mart Stein, Sandra Kengne Kamga Mobou, Jeroen van Kampen, Jolanda Voermans, Aura Timen, Corine GeurtsvanKessel, Annemiek van der Eijk, Richard Molenkamp, Marion Koopmans, on behalf of the Dutch national COVID-19 response team. |
| EPI_ISL_413577 | hCoV-19/Netherlands/Naarden_1364774/2020     | Europe / Netherlands / Naarden       | 2020-03-02 | MHC Gooi & Vechtstreek                      | Erasmus Medical Center | David Nieuwenhuijse, Bas Oude Munnink, Reina Sikkema, Claudia Schapendonk, Irina Chestakova, Anne van der Linden, Mark Pronk, Pascal Lexmond, Corien Swaan, Manon Haverkate, Madelief Mollers, Mart Stein, Sandra Kengne Kamga Mobou, Jeroen van Kampen, Jolanda Voermans, Aura Timen, Corine GeurtsvanKessel, Annemiek van der Eijk, Richard Molenkamp, Marion Koopmans, on behalf of the Dutch national COVID-19 response team. |
| EPI_ISL_413578 | hCoV-19/Netherlands/Nieuwendijk_1363582/2020 | Europe / Netherlands / Nieuwendijk   | 2020-03-01 | ErasmusMC                                   | Erasmus Medical Center | David Nieuwenhuijse, Bas Oude Munnink, Reina Sikkema, Claudia Schapendonk, Irina Chestakova, Anne van der Linden, Mark Pronk, Pascal Lexmond, Corien Swaan, Manon Haverkate, Madelief Mollers, Mart Stein, Sandra Kengne Kamga Mobou, Jeroen van Kampen, Jolanda Voermans, Aura Timen, Corine GeurtsvanKessel, Annemiek van der Eijk, Richard Molenkamp, Marion Koopmans, on behalf of the Dutch national COVID-19 response team. |
| EPI_ISL_413579 | hCoV-19/Netherlands/Nootdorp_1364222/2020    | Europe / Netherlands / Nootdorp      | 2020-03-03 | MHC Haaglanden                              | Erasmus Medical Center | David Nieuwenhuijse, Bas Oude Munnink, Reina Sikkema, Claudia Schapendonk, Irina Chestakova, Anne van der Linden, Mark Pronk, Pascal Lexmond, Corien Swaan, Manon Haverkate, Madelief Mollers, Mart Stein, Sandra Kengne Kamga Mobou, Jeroen van Kampen, Jolanda Voermans, Aura Timen, Corine GeurtsvanKessel, Annemiek van der Eijk, Richard Molenkamp, Marion Koopmans, on behalf of the Dutch national COVID-19 response team. |
| EPI_ISL_413580 | hCoV-19/Netherlands/Oisterwijk_1364072/2020  | Europe / Netherlands / Oisterwijk    | 2020-03-02 | MHC Hart voor Brabant                       | Erasmus Medical Center | David Nieuwenhuijse, Bas Oude Munnink, Reina Sikkema, Claudia Schapendonk, Irina Chestakova, Anne van der Linden, Mark Pronk, Pascal Lexmond, Corien Swaan, Manon Haverkate, Madelief Mollers, Mart Stein, Sandra Kengne Kamga Mobou, Jeroen van Kampen, Jolanda Voermans, Aura Timen, Corine GeurtsvanKessel, Annemiek van der Eijk, Richard Molenkamp, Marion Koopmans, on behalf of the Dutch national COVID-19 response team. |
| EPI_ISL_413581 | hCoV-19/Netherlands/Oss_1363500/2020         | Europe / Netherlands / Oss           | 2020-02-29 | RIVM                                        | Erasmus Medical Center | David Nieuwenhuijse, Bas Oude Munnink, Reina Sikkema, Claudia Schapendonk, Irina Chestakova, Anne van der Linden, Mark Pronk, Pascal Lexmond, Corien Swaan, Manon Haverkate, Madelief Mollers, Mart Stein, Sandra Kengne Kamga Mobou, Jeroen van Kampen, Jolanda Voermans, Aura Timen, Corine GeurtsvanKessel, Annemiek van der Eijk, Richard Molenkamp, Marion Koopmans, on behalf of the Dutch national COVID-19 response team. |

|                |                                           |                                  |            |                                                                        |                                                                                                   |                                                                                                                                                                                                                                                                                                                                                                                                                                   |
|----------------|-------------------------------------------|----------------------------------|------------|------------------------------------------------------------------------|---------------------------------------------------------------------------------------------------|-----------------------------------------------------------------------------------------------------------------------------------------------------------------------------------------------------------------------------------------------------------------------------------------------------------------------------------------------------------------------------------------------------------------------------------|
| EPI_ISL_413582 | hCoV-19/Netherlands/Rotterdam_1363790/20  | Europe / Netherlands / Rotterdam | 2020-03-01 | ErasmusMC                                                              | Erasmus Medical Center                                                                            | David Nieuwenhuijse, Bas Oude Munnink, Reina Sikkema, Claudia Schapendonk, Irina Chestakova, Anne van der Linden, Mark Pronk, Pascal Lexmond, Corien Swaan, Manon Haverkate, Madelief Mollers, Mart Stein, Sandra Kengne Kamga Mobou, Jeroen van Kampen, Jolanda Voermans, Aura Timen, Corine GeurtsvanKessel, Annemiek van der Eijk, Richard Molenkamp, Marion Koopmans, on behalf of the Dutch national COVID-19 response team. |
| EPI_ISL_413583 | hCoV-19/Netherlands/Rotterdam_1364040/20  | Europe / Netherlands / Rotterdam | 2020-03-02 | MHC Rotterdam-Rijnmond                                                 | Erasmus Medical Center                                                                            | David Nieuwenhuijse, Bas Oude Munnink, Reina Sikkema, Claudia Schapendonk, Irina Chestakova, Anne van der Linden, Mark Pronk, Pascal Lexmond, Corien Swaan, Manon Haverkate, Madelief Mollers, Mart Stein, Sandra Kengne Kamga Mobou, Jeroen van Kampen, Jolanda Voermans, Aura Timen, Corine GeurtsvanKessel, Annemiek van der Eijk, Richard Molenkamp, Marion Koopmans, on behalf of the Dutch national COVID-19 response team. |
| EPI_ISL_413584 | hCoV-19/Netherlands/Rotterdam_1364740/20  | Europe / Netherlands / Rotterdam | 2020-03-03 | unknown                                                                | Erasmus Medical Center                                                                            | David Nieuwenhuijse, Bas Oude Munnink, Reina Sikkema, Claudia Schapendonk, Irina Chestakova, Anne van der Linden, Mark Pronk, Pascal Lexmond, Corien Swaan, Manon Haverkate, Madelief Mollers, Mart Stein, Sandra Kengne Kamga Mobou, Jeroen van Kampen, Jolanda Voermans, Aura Timen, Corine GeurtsvanKessel, Annemiek van der Eijk, Richard Molenkamp, Marion Koopmans, on behalf of the Dutch national COVID-19 response team. |
| EPI_ISL_413585 | hCoV-19/Netherlands/Tilburg_/2020         | Europe / Netherlands / Tilburg   | 2020       | unknown                                                                | Erasmus Medical Center                                                                            | David Nieuwenhuijse, Bas Oude Munnink, Reina Sikkema, Claudia Schapendonk, Irina Chestakova, Anne van der Linden, Mark Pronk, Pascal Lexmond, Corien Swaan, Manon Haverkate, Madelief Mollers, Mart Stein, Sandra Kengne Kamga Mobou, Jeroen van Kampen, Jolanda Voermans, Aura Timen, Corine GeurtsvanKessel, Annemiek van der Eijk, Richard Molenkamp, Marion Koopmans, on behalf of the Dutch national COVID-19 response team. |
| EPI_ISL_413586 | hCoV-19/Netherlands/Tilburg_1363354/2020  | Europe / Netherlands / Tilburg   | 2020-02-27 | Foundation Elisabeth-Tweesteden Ziekenhuis                             | Erasmus Medical Center                                                                            | David Nieuwenhuijse, Bas Oude Munnink, Reina Sikkema, Claudia Schapendonk, Irina Chestakova, Anne van der Linden, Mark Pronk, Pascal Lexmond, Corien Swaan, Manon Haverkate, Madelief Mollers, Mart Stein, Sandra Kengne Kamga Mobou, Jeroen van Kampen, Jolanda Voermans, Aura Timen, Corine GeurtsvanKessel, Annemiek van der Eijk, Richard Molenkamp, Marion Koopmans, on behalf of the Dutch national COVID-19 response team. |
| EPI_ISL_413587 | hCoV-19/Netherlands/Tilburg_1364286/2020  | Europe / Netherlands / Tilburg   | 2020-03-03 | Foundation Elisabeth-Tweesteden Ziekenhuis                             | Erasmus Medical Center                                                                            | David Nieuwenhuijse, Bas Oude Munnink, Reina Sikkema, Claudia Schapendonk, Irina Chestakova, Anne van der Linden, Mark Pronk, Pascal Lexmond, Corien Swaan, Manon Haverkate, Madelief Mollers, Mart Stein, Sandra Kengne Kamga Mobou, Jeroen van Kampen, Jolanda Voermans, Aura Timen, Corine GeurtsvanKessel, Annemiek van der Eijk, Richard Molenkamp, Marion Koopmans, on behalf of the Dutch national COVID-19 response team. |
| EPI_ISL_413588 | hCoV-19/Netherlands/Utrecht_1363564/2020  | Europe / Netherlands / Utrecht   | 2020-03-01 | MHC Utrecht                                                            | Erasmus Medical Center                                                                            | David Nieuwenhuijse, Bas Oude Munnink, Reina Sikkema, Claudia Schapendonk, Irina Chestakova, Anne van der Linden, Mark Pronk, Pascal Lexmond, Corien Swaan, Manon Haverkate, Madelief Mollers, Mart Stein, Sandra Kengne Kamga Mobou, Jeroen van Kampen, Jolanda Voermans, Aura Timen, Corine GeurtsvanKessel, Annemiek van der Eijk, Richard Molenkamp, Marion Koopmans, on behalf of the Dutch national COVID-19 response team. |
| EPI_ISL_413589 | hCoV-19/Netherlands/Utrecht_1363628/2020  | Europe / Netherlands / Utrecht   | 2020-03-01 | MHC Utrecht                                                            | Erasmus Medical Center                                                                            | David Nieuwenhuijse, Bas Oude Munnink, Reina Sikkema, Claudia Schapendonk, Irina Chestakova, Anne van der Linden, Mark Pronk, Pascal Lexmond, Corien Swaan, Manon Haverkate, Madelief Mollers, Mart Stein, Sandra Kengne Kamga Mobou, Jeroen van Kampen, Jolanda Voermans, Aura Timen, Corine GeurtsvanKessel, Annemiek van der Eijk, Richard Molenkamp, Marion Koopmans, on behalf of the Dutch national COVID-19 response team. |
| EPI_ISL_413590 | hCoV-19/Netherlands/Utrecht_1364066/2020  | Europe / Netherlands / Utrecht   | 2020-03-02 | MHC Utrecht                                                            | Erasmus Medical Center                                                                            | David Nieuwenhuijse, Bas Oude Munnink, Reina Sikkema, Claudia Schapendonk, Irina Chestakova, Anne van der Linden, Mark Pronk, Pascal Lexmond, Corien Swaan, Manon Haverkate, Madelief Mollers, Mart Stein, Sandra Kengne Kamga Mobou, Jeroen van Kampen, Jolanda Voermans, Aura Timen, Corine GeurtsvanKessel, Annemiek van der Eijk, Richard Molenkamp, Marion Koopmans, on behalf of the Dutch national COVID-19 response team. |
| EPI_ISL_413591 | hCoV-19/Netherlands/Zeevolde_1365080/2020 | Europe / Netherlands / Zeevolde  | 2020-03-02 | MHC Flevoland                                                          | Erasmus Medical Center                                                                            | David Nieuwenhuijse, Bas Oude Munnink, Reina Sikkema, Claudia Schapendonk, Irina Chestakova, Anne van der Linden, Mark Pronk, Pascal Lexmond, Corien Swaan, Manon Haverkate, Madelief Mollers, Mart Stein, Sandra Kengne Kamga Mobou, Jeroen van Kampen, Jolanda Voermans, Aura Timen, Corine GeurtsvanKessel, Annemiek van der Eijk, Richard Molenkamp, Marion Koopmans, on behalf of the Dutch national COVID-19 response team. |
| EPI_ISL_413592 | hCoV-19/Taiwan/NTU03/2020                 | Asia / Taiwan / Taipei           | 2020-03-02 | Department of Laboratory Medicine, National Taiwan University Hospital | Microbial Genomics Core Lab, National Taiwan University Centers of Genomic and Precision Medicine | Shiou-Hwei Yeh, You-Yu Lin, Ya-Yun Lai, Chiao-Ling Li, Shan-Chwen Chang, Pei-Jer Chen, Sui-Yuan Chang                                                                                                                                                                                                                                                                                                                             |

|                |                                   |                                    |            |                                                                                                                |                                                                                                                         |                                                                                                                                                                                                                                                                                                                                                                                   |
|----------------|-----------------------------------|------------------------------------|------------|----------------------------------------------------------------------------------------------------------------|-------------------------------------------------------------------------------------------------------------------------|-----------------------------------------------------------------------------------------------------------------------------------------------------------------------------------------------------------------------------------------------------------------------------------------------------------------------------------------------------------------------------------|
| EPI_ISL_413593 | hCoV-19/Luxembourg/Lux1/2020      | Europe / Luxembourg                | 2020-02-29 | Laboratoire National de Santé                                                                                  | Erasmus Medical Center                                                                                                  | David Nieuwenhuijse, Bas Oude Munnink, Reina Sikkema, Claudia Schapendonk, Irina Chestakova, Anne van der Linden, Mark Pronk, Pascal Lexmond, T. Abdelrahman, G. Fournier, J. Mossong, T. Nguyen, Jeroen van Kampen, Jolanda Voermans, Corine GeurtsvanKessel, Anneliek van der Eijk, Richard Molenkamp, Marion Koopmans, on behalf of the Dutch national COVID-19 response team. |
| EPI_ISL_413594 | hCoV-19/Australia/NSW08/2020      | Oceania / Australia / NSW / Sydney | 2020-02-28 | Centre for Infectious Diseases and Microbiology Laboratory Services                                            | NSW Health Pathology - Institute of Clinical Pathology and Medical Research; Westmead Hospital; University of Sydney    | Rockett R, Eden J-S, Lam C, Gray K, Timms, V, Gall, M, Alicia, A, Carter I, Rahman H, Holmes EC, O'Sullivan MV, Sintchenko V, Chen SC, Maddocks S, Kok J and Dwyer DE for the 2019-nCoV Study Group                                                                                                                                                                               |
| EPI_ISL_413595 | hCoV-19/Australia/NSW09/2020      | Oceania / Australia / NSW / Sydney | 2020-02-28 | Centre for Infectious Diseases and Microbiology Laboratory Services                                            | NSW Health Pathology - Institute of Clinical Pathology and Medical Research; Westmead Hospital; University of Sydney    | Rockett R, Eden J-S, Lam C, Gray K, Timms, V, Gall, M, Carter I, Rahman H, Holmes EC, O'Sullivan MV, Sintchenko V, Chen SC, Maddocks S, Kok J and Dwyer DE for the 2019-nCoV Study Group                                                                                                                                                                                          |
| EPI_ISL_413596 | hCoV-19/Australia/NSW10/2020      | Oceania / Australia / NSW / Sydney | 2020-02-28 | Centre for Infectious Diseases and Microbiology - Public Health                                                | NSW Health Pathology - Institute of Clinical Pathology and Medical Research; Westmead Hospital; University of Sydney    | Rockett R, Eden J-S, Lam C, Gray K, Timms, V, Gall, M, Carter I, Rahman H, Holmes EC, O'Sullivan MV, Sintchenko V, Chen SC, Maddocks S, Kok J and Dwyer DE for the 2019-nCoV Study Group                                                                                                                                                                                          |
| EPI_ISL_413597 | hCoV-19/Australia/NSW11/2020      | Oceania / Australia / NSW / Sydney | 2020-03-02 | Centre for Infectious Diseases and Microbiology- Public Health                                                 | NSW Health Pathology - Institute of Clinical Pathology and Medical Research; Westmead Hospital; University of Sydney    | Lam C, Eden J-S, Rockett R, Gray K, Timms, V, Gall, M, Carter I, Rahman H, Holmes EC, O'Sullivan MV, Sintchenko V, Chen SC, Maddocks S, Kok J and Dwyer DE for the 2019-nCoV Study Group                                                                                                                                                                                          |
| EPI_ISL_413598 | hCoV-19/Australia/NSW12/2020      | Oceania / Australia / NSW / Sydney | 2020-03-04 | Centre for Infectious Diseases and Microbiology - Public Health                                                | NSW Health Pathology - Institute of Clinical Pathology and Medical Research; Westmead Hospital; University of Sydney    | Gray K, Eden J-S, Lam C, Rockett R, Timms, V, Gall, M, Carter I, Rahman H, Holmes EC, O'Sullivan MV, Sintchenko V, Chen SC, Maddocks S, Kok J and Dwyer DE for the 2019-nCoV Study Group                                                                                                                                                                                          |
| EPI_ISL_413599 | hCoV-19/Australia/NSW13/2020      | Oceania / Australia / NSW / Sydney | 2020-03-04 | Centre for Infectious Diseases and Microbiology - Public Health                                                | NSW Health Pathology - Institute of Clinical Pathology and Medical Research; Westmead Hospital; University of Sydney    | Timms, V, Eden J-S, Lam C, Gray K, Rockett R, Gall, M, Carter I, Rahman H, Holmes EC, O'Sullivan MV, Sintchenko V, Chen SC, Maddocks S, Kok J and Dwyer DE for the 2019-nCoV Study Group                                                                                                                                                                                          |
| EPI_ISL_413600 | hCoV-19/Australia/NSW14/2020      | Oceania / Australia / NSW / Sydney | 2020-03-03 | Centre for Infectious Diseases and Microbiology - Public Health                                                | NSW Health Pathology - Institute of Clinical Pathology and Medical Research; Westmead Hospital; University of Sydney    | Gall, M, Eden J-S, Lam C, Gray K, Timms, V, Rockett R, Carter I, Rahman H, Holmes EC, O'Sullivan MV, Sintchenko V, Chen SC, Maddocks S, Kok J and Dwyer DE for the 2019-nCoV Study Group                                                                                                                                                                                          |
| EPI_ISL_413601 | hCoV-19/USA/WA13-UW9/2020         | North America / USA / Washington   | 2020-03-02 | UW Virology Lab                                                                                                | UW Virology Lab                                                                                                         | Pavitra Roychoudhury, Hong Xie, Keith Jerome, Alexander Greninger                                                                                                                                                                                                                                                                                                                 |
| EPI_ISL_413602 | hCoV-19/Finland/FIN03032020A/2020 | Europe / Finland / Helsinki        | 2020-03-03 | Department of Virology and Immunology, University of Helsinki and Helsinki University Hospital, Huslab Finland | Department of Virology, Faculty of Medicine, University of Helsinki, Helsinki, Finland                                  | Teemu Smura, Hannimari Kallio-Kokko, Olli Vapalahti                                                                                                                                                                                                                                                                                                                               |
| EPI_ISL_413603 | hCoV-19/Finland/FIN03032020B/2020 | Europe / Finland / Helsinki        | 2020-03-03 | Department of Virology and Immunology, University of Helsinki and Helsinki University Hospital, Huslab Finland | Department of Virology, Faculty of Medicine, University of Helsinki, Helsinki, Finland                                  | Teemu Smura, Hannimari Kallio-Kokko, Olli Vapalahti                                                                                                                                                                                                                                                                                                                               |
| EPI_ISL_413604 | hCoV-19/Finland/FIN03032020C/2020 | Europe / Finland / Helsinki        | 2020-03-03 | Department of Virology and Immunology, University of Helsinki and Helsinki University Hospital, Huslab Finland | Department of Virology, Faculty of Medicine, University of Helsinki, Helsinki, Finland                                  | Teemu Smura, Hannimari Kallio-Kokko, Olli Vapalahti                                                                                                                                                                                                                                                                                                                               |
| EPI_ISL_413605 | hCoV-19/Finland/FIN01032020/2020  | Europe / Finland / Helsinki        | 2020-03-01 | Department of Virology and Immunology, University of Helsinki and Helsinki University Hospital, Huslab Finland | Department of Virology, Faculty of Medicine, University of Helsinki, Helsinki, Finland                                  | Teemu Smura, Hannimari Kallio-Kokko, Olli Vapalahti                                                                                                                                                                                                                                                                                                                               |
| EPI_ISL_413606 | hCoV-19/USA/CruiseA-1/2020        | North America / USA                | 2020-02-17 | unknown                                                                                                        | Pathogen Discovery, Respiratory Viruses Branch, Division of Viral Diseases, Centers for Diseases Control and Prevention | Anna Uehara, Ying Tao, Clinton R. Paden, Krista Queen, Jing Zhang, Yan Li, Mary S. Keckler, Alison S Laufer Halpin, Haibin Wang, Jasmine Padilla, Justin Lee, Christopher A. Elkins, Susan I. Gerber, Suxiang Tong                                                                                                                                                                |
| EPI_ISL_413607 | hCoV-19/USA/CruiseA-2/2020        | North America / USA                | 2020-02-18 | unknown                                                                                                        | Pathogen Discovery, Respiratory Viruses Branch, Division of Viral Diseases, Centers for Diseases Control and Prevention | Anna Uehara, Ying Tao, Clinton R. Paden, Krista Queen, Jing Zhang, Yan Li, Mary S. Keckler, Alison S Laufer Halpin, Haibin Wang, Jasmine Padilla, Justin Lee, Christopher A. Elkins, Susan I. Gerber, Suxiang Tong                                                                                                                                                                |
| EPI_ISL_413608 | hCoV-19/USA/CruiseA-3/2020        | North America / USA                | 2020-02-18 | unknown                                                                                                        | Pathogen Discovery, Respiratory Viruses Branch, Division of Viral Diseases, Centers for Diseases Control and Prevention | Anna Uehara, Ying Tao, Clinton R. Paden, Krista Queen, Jing Zhang, Yan Li, Mary S. Keckler, Alison S Laufer Halpin, Haibin Wang, Jasmine Padilla, Justin Lee, Christopher A. Elkins, Susan I. Gerber, Suxiang Tong                                                                                                                                                                |
| EPI_ISL_413609 | hCoV-19/USA/CruiseA-4/2020        | North America / USA                | 2020-02-21 | unknown                                                                                                        | Pathogen Discovery, Respiratory Viruses Branch, Division of Viral Diseases, Centers for Diseases Control and Prevention | Anna Uehara, Ying Tao, Clinton R. Paden, Krista Queen, Jing Zhang, Yan Li, Mary S. Keckler, Alison S Laufer Halpin, Haibin Wang, Jasmine Padilla, Justin Lee, Christopher A. Elkins, Susan I. Gerber, Suxiang Tong                                                                                                                                                                |
| EPI_ISL_413610 | hCoV-19/USA/CruiseA-5/2020        | North America / USA                | 2020-02-21 | unknown                                                                                                        | Pathogen Discovery, Respiratory Viruses Branch, Division of Viral Diseases, Centers for Diseases Control and Prevention | Anna Uehara, Ying Tao, Clinton R. Paden, Krista Queen, Jing Zhang, Yan Li, Mary S. Keckler, Alison S Laufer Halpin, Haibin Wang, Jasmine Padilla, Justin Lee, Christopher A. Elkins, Susan I. Gerber, Suxiang Tong                                                                                                                                                                |
| EPI_ISL_413611 | hCoV-19/USA/CruiseA-6/2020        | North America / USA                | 2020-02-21 | unknown                                                                                                        | Pathogen Discovery, Respiratory Viruses Branch, Division of Viral Diseases, Centers for Diseases Control and Prevention | Anna Uehara, Ying Tao, Clinton R. Paden, Krista Queen, Jing Zhang, Yan Li, Haibin Wang, Shifaq Kamili, Xiaoyan Lu, Brian Lynch, Senthil Kumar K. Sakthivel, Brett L. Whitaker, Lijuan Wang, Janna' R. Murray, Jasmine Padilla, Justin Lee, Susan I. Gerber, Stephen Lindstrom, Suxiang Tong                                                                                       |
| EPI_ISL_413612 | hCoV-19/USA/CruiseA-7/2020        | North America / USA                | 2020-02-17 | unknown                                                                                                        | Pathogen Discovery, Respiratory Viruses Branch, Division of Viral Diseases, Centers for Diseases Control and Prevention | Ying Tao, Clinton R. Paden, Krista Queen, Anna Uehara, Jing Zhang, Yan Li, Haibin Wang, Shifaq Kamili, Xiaoyan Lu, Brian Lynch, Senthil Kumar K. Sakthivel, Brett L. Whitaker, Lijuan Wang, Janna' R. Murray, Jasmine Padilla, Justin Lee, Susan I. Gerber, Stephen Lindstrom, Suxiang Tong                                                                                       |
| EPI_ISL_413613 | hCoV-19/USA/CruiseA-8/2020        | North America / USA                | 2020-02-17 | unknown                                                                                                        | Pathogen Discovery, Respiratory Viruses Branch, Division of Viral Diseases, Centers for Diseases Control and Prevention | Ying Tao, Clinton R. Paden, Krista Queen, Anna Uehara, Jing Zhang, Yan Li, Haibin Wang, Shifaq Kamili, Xiaoyan Lu, Brian Lynch, Senthil Kumar K. Sakthivel, Brett L. Whitaker, Lijuan Wang, Janna' R. Murray, Jasmine Padilla, Justin Lee, Susan I. Gerber, Stephen Lindstrom, Suxiang Tong                                                                                       |
| EPI_ISL_413614 | hCoV-19/USA/CruiseA-9/2020        | North America / USA                | 2020-02-17 | unknown                                                                                                        | Pathogen Discovery, Respiratory Viruses Branch, Division of Viral Diseases, Centers for Diseases Control and Prevention | Ying Tao, Clinton R. Paden, Krista Queen, Anna Uehara, Jing Zhang, Yan Li, Haibin Wang, Shifaq Kamili, Xiaoyan Lu, Brian Lynch, Senthil Kumar K. Sakthivel, Brett L. Whitaker, Lijuan Wang, Janna' R. Murray, Jasmine Padilla, Justin Lee, Susan I. Gerber, Stephen Lindstrom, Suxiang Tong                                                                                       |
| EPI_ISL_413615 | hCoV-19/USA/CruiseA-10/2020       | North America / USA                | 2020-02-17 | unknown                                                                                                        | Pathogen Discovery, Respiratory Viruses Branch, Division of Viral Diseases, Centers for Diseases Control and Prevention | Ying Tao, Clinton R. Paden, Krista Queen, Anna Uehara, Jing Zhang, Yan Li, Haibin Wang, Shifaq Kamili, Xiaoyan Lu, Brian Lynch, Senthil Kumar K. Sakthivel, Brett L. Whitaker, Lijuan Wang, Janna' R. Murray, Jasmine Padilla, Justin Lee, Susan I. Gerber, Stephen Lindstrom, Suxiang Tong                                                                                       |









|                |                                                                |                                                   |            |                                                                                                                      |                                                          |                                                                                                                                                                                                                                                                                                                                                                                                                                                  |
|----------------|----------------------------------------------------------------|---------------------------------------------------|------------|----------------------------------------------------------------------------------------------------------------------|----------------------------------------------------------|--------------------------------------------------------------------------------------------------------------------------------------------------------------------------------------------------------------------------------------------------------------------------------------------------------------------------------------------------------------------------------------------------------------------------------------------------|
| EPI_ISL_413881 | hCoV-19/Guangdong/GDSZ202009-P0032/20 Asia / China / Guangdong |                                                   | 2020-02-05 | Guangdong Provincial Institution of Public Health,<br>Guangdong Provincial Center for Disease Control and Prevention | Guangdong Provincial Institution of Public Health        | Jing Lu, Louis du Plessis, Liu Zhe, Jiu Feng Sun, Sarah François, Huifang Lin, Moritz Kraemer, Jingju Peng, Qianlin Xiong, Runyu Yuan, Lillian Zeng, Pingping Zhou, Chuming Liang, Tao Liu, Wei Li, Juan Su, Huanying Zheng, Kang Min, Song Tie, Bo Peng, Shisong Fang, Wenzhe Su, Kuibiao Li, Ruilin Sun, Ru bai, Xi Tang, Minfeng Liang, Nuno Faria, Josh Quick, Andrew Rambaut, Verity Hill, Wenjun Ma, Nick Loman, Oliver Pybus, Changwen Ke |
| EPI_ISL_413882 | hCoV-19/Guangdong/GD2020139-P0007/202 Asia / China / Guangdong |                                                   | 2020-02-02 | Guangdong Provincial Institution of Public Health,<br>Guangdong Provincial Center for Disease Control and Prevention | Guangdong Provincial Institution of Public Health        | Jing Lu, Louis du Plessis, Liu Zhe, Jiu Feng Sun, Sarah François, Huifang Lin, Moritz Kraemer, Jingju Peng, Qianlin Xiong, Runyu Yuan, Lillian Zeng, Pingping Zhou, Chuming Liang, Tao Liu, Wei Li, Juan Su, Huanying Zheng, Kang Min, Song Tie, Bo Peng, Shisong Fang, Wenzhe Su, Kuibiao Li, Ruilin Sun, Ru bai, Xi Tang, Minfeng Liang, Nuno Faria, Josh Quick, Andrew Rambaut, Verity Hill, Wenjun Ma, Nick Loman, Oliver Pybus, Changwen Ke |
| EPI_ISL_413883 | hCoV-19/Guangdong/GD2020134-P0031/202 Asia / China / Guangdong |                                                   | 2020-02-02 | Guangdong Provincial Institution of Public Health,<br>Guangdong Provincial Center for Disease Control and Prevention | Guangdong Provincial Institution of Public Health        | Jing Lu, Louis du Plessis, Liu Zhe, Jiu Feng Sun, Sarah François, Huifang Lin, Moritz Kraemer, Jingju Peng, Qianlin Xiong, Runyu Yuan, Lillian Zeng, Pingping Zhou, Chuming Liang, Tao Liu, Wei Li, Juan Su, Huanying Zheng, Kang Min, Song Tie, Bo Peng, Shisong Fang, Wenzhe Su, Kuibiao Li, Ruilin Sun, Ru bai, Xi Tang, Minfeng Liang, Nuno Faria, Josh Quick, Andrew Rambaut, Verity Hill, Wenjun Ma, Nick Loman, Oliver Pybus, Changwen Ke |
| EPI_ISL_413884 | hCoV-19/Guangdong/GD2020115-P0009/202 Asia / China / Guangdong |                                                   | 2020-02-01 | Guangdong Provincial Institution of Public Health,<br>Guangdong Provincial Center for Disease Control and Prevention | Guangdong Provincial Institution of Public Health        | Jing Lu, Louis du Plessis, Liu Zhe, Jiu Feng Sun, Sarah François, Huifang Lin, Moritz Kraemer, Jingju Peng, Qianlin Xiong, Runyu Yuan, Lillian Zeng, Pingping Zhou, Chuming Liang, Tao Liu, Wei Li, Juan Su, Huanying Zheng, Kang Min, Song Tie, Bo Peng, Shisong Fang, Wenzhe Su, Kuibiao Li, Ruilin Sun, Ru bai, Xi Tang, Minfeng Liang, Nuno Faria, Josh Quick, Andrew Rambaut, Verity Hill, Wenjun Ma, Nick Loman, Oliver Pybus, Changwen Ke |
| EPI_ISL_413885 | hCoV-19/Guangdong/GD2020016-P0011/202 Asia / China / Guangdong |                                                   | 2020-02-01 | Guangdong Provincial Institution of Public Health,<br>Guangdong Provincial Center for Disease Control and Prevention | Guangdong Provincial Institution of Public Health        | Jing Lu, Louis du Plessis, Liu Zhe, Jiu Feng Sun, Sarah François, Huifang Lin, Moritz Kraemer, Jingju Peng, Qianlin Xiong, Runyu Yuan, Lillian Zeng, Pingping Zhou, Chuming Liang, Tao Liu, Wei Li, Juan Su, Huanying Zheng, Kang Min, Song Tie, Bo Peng, Shisong Fang, Wenzhe Su, Kuibiao Li, Ruilin Sun, Ru bai, Xi Tang, Minfeng Liang, Nuno Faria, Josh Quick, Andrew Rambaut, Verity Hill, Wenjun Ma, Nick Loman, Oliver Pybus, Changwen Ke |
| EPI_ISL_413886 | hCoV-19/Guangdong/GD2020012-P0022/202 Asia / China / Guangdong |                                                   | 2020-02-01 | Guangdong Provincial Institution of Public Health,<br>Guangdong Provincial Center for Disease Control and Prevention | Guangdong Provincial Institution of Public Health        | Jing Lu, Louis du Plessis, Liu Zhe, Jiu Feng Sun, Sarah François, Huifang Lin, Moritz Kraemer, Jingju Peng, Qianlin Xiong, Runyu Yuan, Lillian Zeng, Pingping Zhou, Chuming Liang, Tao Liu, Wei Li, Juan Su, Huanying Zheng, Kang Min, Song Tie, Bo Peng, Shisong Fang, Wenzhe Su, Kuibiao Li, Ruilin Sun, Ru bai, Xi Tang, Minfeng Liang, Nuno Faria, Josh Quick, Andrew Rambaut, Verity Hill, Wenjun Ma, Nick Loman, Oliver Pybus, Changwen Ke |
| EPI_ISL_413887 | hCoV-19/Guangdong/GD2020085-P0043/202 Asia / China / Guangdong |                                                   | 2020-02-01 | Guangdong Provincial Institution of Public Health,<br>Guangdong Provincial Center for Disease Control and Prevention | Guangdong Provincial Institution of Public Health        | Jing Lu, Louis du Plessis, Liu Zhe, Jiu Feng Sun, Sarah François, Huifang Lin, Moritz Kraemer, Jingju Peng, Qianlin Xiong, Runyu Yuan, Lillian Zeng, Pingping Zhou, Chuming Liang, Tao Liu, Wei Li, Juan Su, Huanying Zheng, Kang Min, Song Tie, Bo Peng, Shisong Fang, Wenzhe Su, Kuibiao Li, Ruilin Sun, Ru bai, Xi Tang, Minfeng Liang, Nuno Faria, Josh Quick, Andrew Rambaut, Verity Hill, Wenjun Ma, Nick Loman, Oliver Pybus, Changwen Ke |
| EPI_ISL_413900 | hCoV-19/Guangdong/ZS-S6-P0060/2020 Asia / China / Guangdong    |                                                   | 2020-02-28 | Guangdong Provincial Institution of Public Health,<br>Guangdong Provincial Center for Disease Control and Prevention | Guangdong Provincial Institution of Public Health        | Jing Lu, Louis du Plessis, Liu Zhe, Jiu Feng Sun, Sarah François, Huifang Lin, Moritz Kraemer, Jingju Peng, Qianlin Xiong, Runyu Yuan, Lillian Zeng, Pingping Zhou, Chuming Liang, Tao Liu, Wei Li, Juan Su, Huanying Zheng, Kang Min, Song Tie, Bo Peng, Shisong Fang, Wenzhe Su, Kuibiao Li, Ruilin Sun, Ru bai, Xi Tang, Minfeng Liang, Nuno Faria, Josh Quick, Andrew Rambaut, Verity Hill, Wenjun Ma, Nick Loman, Oliver Pybus, Changwen Ke |
| EPI_ISL_413901 | hCoV-19/Guangdong/ZQ-S2-P0061/2020 Asia / China / Guangdong    |                                                   | 2020-02-28 | Guangdong Provincial Institution of Public Health,<br>Guangdong Provincial Center for Disease Control and Prevention | Guangdong Provincial Institution of Public Health        | Jing Lu, Louis du Plessis, Liu Zhe, Jiu Feng Sun, Sarah François, Huifang Lin, Moritz Kraemer, Jingju Peng, Qianlin Xiong, Runyu Yuan, Lillian Zeng, Pingping Zhou, Chuming Liang, Tao Liu, Wei Li, Juan Su, Huanying Zheng, Kang Min, Song Tie, Bo Peng, Shisong Fang, Wenzhe Su, Kuibiao Li, Ruilin Sun, Ru bai, Xi Tang, Minfeng Liang, Nuno Faria, Josh Quick, Andrew Rambaut, Verity Hill, Wenjun Ma, Nick Loman, Oliver Pybus, Changwen Ke |
| EPI_ISL_413902 | hCoV-19/Guangdong/JM-S1-P0062/2020 Asia / China / Guangdong    |                                                   | 2020-02-28 | Guangdong Provincial Institution of Public Health,<br>Guangdong Provincial Center for Disease Control and Prevention | Guangdong Provincial Institution of Public Health        | Jing Lu, Louis du Plessis, Liu Zhe, Jiu Feng Sun, Sarah François, Huifang Lin, Moritz Kraemer, Jingju Peng, Qianlin Xiong, Runyu Yuan, Lillian Zeng, Pingping Zhou, Chuming Liang, Tao Liu, Wei Li, Juan Su, Huanying Zheng, Kang Min, Song Tie, Bo Peng, Shisong Fang, Wenzhe Su, Kuibiao Li, Ruilin Sun, Ru bai, Xi Tang, Minfeng Liang, Nuno Faria, Josh Quick, Andrew Rambaut, Verity Hill, Wenjun Ma, Nick Loman, Oliver Pybus, Changwen Ke |
| EPI_ISL_413904 | hCoV-19/Iran/Qom255194/2020                                    | Asia / Iran / Qom                                 | 2020-02-09 | Iran National Influenza Center                                                                                       | Iran National Influenza Center                           | Nazanin Zahra Shafiei Jandaghi, Jila Yavarian, Fatemeh AjamiNejad, Nastaran Ghavvami, Kaveh Sadeghi and Talat Mokhtari Azad                                                                                                                                                                                                                                                                                                                      |
| EPI_ISL_413905 | hCoV-19/Iran/25Aq/2020                                         | Asia / Iran / Tehran                              | 2020-02-22 | Iran National Influenza Center                                                                                       | Iran National Influenza Center                           | Nazanin Zahra Shafiei Jandaghi, Jila Yavarian, Vahid Salimi, Kaveh Sadeghi and Talat Mokhtari Azad                                                                                                                                                                                                                                                                                                                                               |
| EPI_ISL_413906 | hCoV-19/Iran/257182/2020                                       | Asia / Iran / Tehran                              | 2020-02-17 | Iran National Influenza Center                                                                                       | Iran National Influenza Center                           | Jila Yavarian, Nazanin Zahra Shafiei Jandaghi, Kaveh Sadeghi, Nastaran Ghavvami, Fatemeh Ajaminejad and Talat Mokhtari Azad                                                                                                                                                                                                                                                                                                                      |
| EPI_ISL_413922 | hCoV-19/USA/CA-CDPH-UC5/2020                                   | North America / USA / California / Gr: 2020-03-05 |            | California Department of Public Health                                                                               | Chiu Laboratory, University of California, San Francisco | Xianding Deng, Scot Federman, Chao-Yang Pan, Hugo Guevara, Wei Gu, Debra A. Wadford, and Charles Y. Chiu                                                                                                                                                                                                                                                                                                                                         |
| EPI_ISL_413924 | hCoV-19/USA/CA-CDPH-UC6/2020                                   | North America / USA / California / Gr: 2020-03-05 |            | California Department of Public Health                                                                               | Chiu Laboratory, University of California, San Francisco | Xianding Deng, Scot Federman, Chao-Yang Pan, Hugo Guevara, Wei Gu, Debra A. Wadford, and Charles Y. Chiu                                                                                                                                                                                                                                                                                                                                         |
| EPI_ISL_413925 | hCoV-19/USA/CA-CDPH-UC7/2020                                   | North America / USA / California / Gr: 2020-03-05 |            | California Department of Public Health                                                                               | Chiu Laboratory, University of California, San Francisco | Xianding Deng, Scot Federman, Chao-Yang Pan, Hugo Guevara, Wei Gu, Debra A. Wadford, and Charles Y. Chiu                                                                                                                                                                                                                                                                                                                                         |

|                |                                 |                                        |            |                                                                                |                                                                                               |                                                                                                                                                                                                                                               |
|----------------|---------------------------------|----------------------------------------|------------|--------------------------------------------------------------------------------|-----------------------------------------------------------------------------------------------|-----------------------------------------------------------------------------------------------------------------------------------------------------------------------------------------------------------------------------------------------|
| EPI_ISL_413926 | hCoV-19/USA/CA-CDPH-UC8/2020    | North America / USA / California / Gr  | 2020-03-05 | California Department of Public Health                                         | Chiu Laboratory, University of California, San Francisco                                      | Xiangding Deng, Scot Federman, Chao-Yang Pan, Hugo Guevara, Wei Gu, Debra A. Wadford, and Charles Y. Chiu                                                                                                                                     |
| EPI_ISL_413928 | hCoV-19/USA/CA-CDPH-UC9/2020    | North America / USA / California / Gr  | 2020-03-05 | California Department of Public Health                                         | Chiu Laboratory, University of California, San Francisco<br>Chiu Laboratory                   | Xiangding Deng, Scot Federman, Chao-Yang Pan, Hugo Guevara, Wei Gu, Debra A. Wadford, and Charles Y. Chiu                                                                                                                                     |
| EPI_ISL_413930 | hCoV-19/USA/CA-CDPH-UC10/2020   | North America / USA / California / Sa  | 2020-03-05 | California Department of Public Health                                         | UCSF-Abbott Viral Diagnostics and Discovery Center<br>University of California, San Francisco | Xiangding Deng, Scot Federman, Guixia Yu, Chao-Yang Pan, Hugo Guevara, Alicia Sotomayor-Gonzalez, Allan Gopez, Wei Gu, Steve Miller, Debra A. Wadford, and Charles Y. Chiu                                                                    |
| EPI_ISL_413931 | hCoV-19/USA/CA-CDPH-UC11/2020   | North America / USA / California / Gr  | 2020-03-05 | California Department of Public Health                                         | Chiu Laboratory, University of California, San Francisco                                      | Xiangding Deng, Scot Federman, Chao-Yang Pan, Hugo Guevara, Wei Gu, Debra A. Wadford, and Charles Y. Chiu                                                                                                                                     |
| EPI_ISL_413949 | hCoV-19/Iran/Tehran1337/2020    | Asia / Iran / Tehran                   | 2020-03-03 | Iran National Influenza Center                                                 | Iran National Influenza Center                                                                | Jila Yavarian, Nazarin Zahra Shafiei Jandaghi, Kaveh Sadeghi, Saedeedeh Mahfozi and Talat Mokhtari Azad                                                                                                                                       |
| EPI_ISL_413955 | hCoV-19/Iran/Tehran1319/2020    | Asia / Iran / Tehran                   | 2020-03-05 | Iran National Influenza Center                                                 | Iran National Influenza Center                                                                | Nazarin Zahra Shafiei Jandaghi, Jila Yavarian, Kaveh Sadeghi, Vahid Salimi, Simin Abbasi and Talat Mokhtari Azad                                                                                                                              |
| EPI_ISL_413996 | hCoV-19/Switzerland/T19486/2020 | Europe / Switzerland / Tessin          | 2020-02-24 | Laboratoire de Virologie, HUG                                                  | Swiss National Reference Centre for Influenza                                                 | LAUBSCHER Florian et al.                                                                                                                                                                                                                      |
| EPI_ISL_413997 | hCoV-19/Switzerland/GE3895/2020 | Europe / Switzerland / Geneva          | 2020-02-26 | Laboratoire de Virologie, HUG                                                  | Swiss National Reference Centre for Influenza                                                 | LAUBSCHER Florian et al.                                                                                                                                                                                                                      |
| EPI_ISL_413999 | hCoV-19/Switzerland/AG0361/2020 | Europe / Switzerland / Argovie         | 2020-02-27 | Laboratoire de Virologie, HUG                                                  | Swiss National Reference Centre for Influenza                                                 | LAUBSCHER Florian et al.                                                                                                                                                                                                                      |
| EPI_ISL_414005 | hCoV-19/England/200940527/2020  | Europe / United Kingdom / England      | 2020-02-25 | Respiratory Virus Unit, Microbiology Services Colindale, Public Health England | Respiratory Virus Unit, Microbiology Services Colindale, Public Health England                | Monica Galiano, Shahjahan Miah, Angie Lackenby, Omolola Akinbami, Tiina Talts, Leena Bhaw, Richard Myers, Steven Platt, Kirstin Edwards, Jonathan Hubb, Joanna Ellis, Maria Zambon                                                            |
| EPI_ISL_414006 | hCoV-19/England/200990724/2020  | Europe / United Kingdom / England      | 2020-02-28 | Respiratory Virus Unit, Microbiology Services Colindale, Public Health England | Respiratory Virus Unit, Microbiology Services Colindale, Public Health England                | Monica Galiano, Shahjahan Miah, Angie Lackenby, Omolola Akinbami, Tiina Talts, Leena Bhaw, Richard Myers, Steven Platt, Kirstin Edwards, Jonathan Hubb, Joanna Ellis, Maria Zambon                                                            |
| EPI_ISL_414007 | hCoV-19/England/200990725/2020  | Europe / United Kingdom / England      | 2020-02-28 | Respiratory Virus Unit, Microbiology Services Colindale, Public Health England | Respiratory Virus Unit, Microbiology Services Colindale, Public Health England                | Monica Galiano, Shahjahan Miah, Angie Lackenby, Omolola Akinbami, Tiina Talts, Leena Bhaw, Richard Myers, Steven Platt, Kirstin Edwards, Jonathan Hubb, Joanna Ellis, Maria Zambon                                                            |
| EPI_ISL_414008 | hCoV-19/England/200960041/2020  | Europe / United Kingdom / England      | 2020-02-27 | Respiratory Virus Unit, Microbiology Services Colindale, Public Health England | Respiratory Virus Unit, Microbiology Services Colindale, Public Health England                | Monica Galiano, Shahjahan Miah, Angie Lackenby, Omolola Akinbami, Tiina Talts, Leena Bhaw, Richard Myers, Steven Platt, Kirstin Edwards, Jonathan Hubb, Joanna Ellis, Maria Zambon                                                            |
| EPI_ISL_414009 | hCoV-19/England/200960515/2020  | Europe / United Kingdom / England      | 2020-02-25 | Respiratory Virus Unit, Microbiology Services Colindale, Public Health England | Respiratory Virus Unit, Microbiology Services Colindale, Public Health England                | Monica Galiano, Shahjahan Miah, Angie Lackenby, Omolola Akinbami, Tiina Talts, Leena Bhaw, Richard Myers, Steven Platt, Kirstin Edwards, Jonathan Hubb, Joanna Ellis, Maria Zambon                                                            |
| EPI_ISL_414010 | hCoV-19/England/200981386/2020  | Europe / United Kingdom / England      | 2020-02-26 | Respiratory Virus Unit, Microbiology Services Colindale, Public Health England | Respiratory Virus Unit, Microbiology Services Colindale, Public Health England                | Monica Galiano, Shahjahan Miah, Angie Lackenby, Omolola Akinbami, Tiina Talts, Leena Bhaw, Richard Myers, Steven Platt, Kirstin Edwards, Jonathan Hubb, Joanna Ellis, Maria Zambon                                                            |
| EPI_ISL_414011 | hCoV-19/England/200990006/2020  | Europe / United Kingdom / England      | 2020-02-26 | Respiratory Virus Unit, Microbiology Services Colindale, Public Health England | Respiratory Virus Unit, Microbiology Services Colindale, Public Health England                | Monica Galiano, Shahjahan Miah, Angie Lackenby, Omolola Akinbami, Tiina Talts, Leena Bhaw, Richard Myers, Steven Platt, Kirstin Edwards, Jonathan Hubb, Joanna Ellis, Maria Zambon                                                            |
| EPI_ISL_414012 | hCoV-19/England/200990723/2020  | Europe / United Kingdom / England      | 2020-02-27 | Respiratory Virus Unit, Microbiology Services Colindale, Public Health England | Respiratory Virus Unit, Microbiology Services Colindale, Public Health England                | Monica Galiano, Shahjahan Miah, Angie Lackenby, Omolola Akinbami, Tiina Talts, Leena Bhaw, Richard Myers, Steven Platt, Kirstin Edwards, Jonathan Hubb, Joanna Ellis, Maria Zambon                                                            |
| EPI_ISL_414013 | hCoV-19/England/201000003/2020  | Europe / United Kingdom / England      | 2020-03-01 | Respiratory Virus Unit, Microbiology Services Colindale, Public Health England | Respiratory Virus Unit, Microbiology Services Colindale, Public Health England                | Monica Galiano, Shahjahan Miah, Angie Lackenby, Omolola Akinbami, Tiina Talts, Leena Bhaw, Richard Myers, Steven Platt, Kirstin Edwards, Jonathan Hubb, Joanna Ellis, Maria Zambon                                                            |
| EPI_ISL_414014 | hCoV-19/Brazil/SPBR-03/2020     | South America / Brazil / Sao Paulo     | 2020-03-02 | Hospital Israelita Albert Einstein                                             | Instituto Adolfo Lutz, Interdisciplinary Procedures Center, Strategic Laboratory              | Claudio Tavares Sacchi, Claudia Regina Gonçalves, Katia Correia dos Santos, Carlos Henrique Camargo, Maria do Carmo Sampaio Tavares Timenetsky, Terezinha Maria de Paiva, Ester Cerdeira Sabino                                               |
| EPI_ISL_414015 | hCoV-19/Brazil/SPBR-06/2020     | South America / Brazil / Sao Paulo / † | 2020-02-29 | Hospital São Joaquim Beneficencia Portuguesa                                   | Instituto Adolfo Lutz, Interdisciplinary Procedures Center, Strategic Laboratory              | Claudio Tavares Sacchi, Claudia Regina Gonçalves, Audrey Cilli, Carlos Henrique Camargo, Maria do Carmo Sampaio Tavares Timenetsky, Daniela Bernardes Borges da Silva, Terezinha Maria de Paiva, Ester Cerdeira Sabino                        |
| EPI_ISL_414016 | hCoV-19/Brazil/SPBR-05/2020     | South America / Brazil / Sao Paulo / † | 2020-02-29 | Hospital São Joaquim Beneficencia Portuguesa                                   | Instituto Adolfo Lutz, Interdisciplinary Procedures Center, Strategic Laboratory              | Claudio Tavares Sacchi, Claudia Regina Gonçalves, Fabiana Cristina Pereira dos Santos, Carlos Henrique Camargo, Maria do Carmo Sampaio Tavares Timenetsky, Daniela Bernardes Borges da Silva, Terezinha Maria de Paiva, Ester Cerdeira Sabino |
| EPI_ISL_414017 | hCoV-19/Brazil/SPBR-04/2020     | South America / Brazil / Sao Paulo     | 2020-03-04 | Hospital São Joaquim Beneficencia Portuguesa                                   | Instituto Adolfo Lutz, Interdisciplinary Procedures Center, Strategic Laboratory              | Claudio Tavares Sacchi, Claudia Regina Gonçalves, Audrey Cilli, Carlos Henrique Camargo, Maria do Carmo Sampaio Tavares Timenetsky, Daniela Bernardes Borges da Silva, Terezinha Maria de Paiva, Ester Cerdeira Sabino                        |
| EPI_ISL_414019 | hCoV-19/Switzerland/GE3121/2020 | Europe / Switzerland / Geneva          | 2020-02-27 | Laboratoire de Virologie, HUG                                                  | Swiss National Reference Centre for Influenza                                                 | LAUBSCHER Florian et al.                                                                                                                                                                                                                      |
| EPI_ISL_414020 | hCoV-19/Switzerland/GE5373/2020 | Europe / Switzerland / Geneva          | 2020-02-27 | Laboratoire de Virologie, HUG                                                  | Swiss National Reference Centre for Influenza                                                 | LAUBSCHER Florian et al.                                                                                                                                                                                                                      |
| EPI_ISL_414021 | hCoV-19/Switzerland/BL0902/2020 | Europe / Switzerland / Basel           | 2020-02-27 | Laboratoire de Virologie, HUG                                                  | Swiss National Reference Centre for Influenza                                                 | LAUBSCHER Florian et al.                                                                                                                                                                                                                      |
| EPI_ISL_414022 | hCoV-19/Switzerland/GE9586/2020 | Europe / Switzerland / Geneva          | 2020-02-27 | Laboratoire de Virologie, HUG                                                  | Swiss National Reference Centre for Influenza                                                 | LAUBSCHER Florian et al.                                                                                                                                                                                                                      |
| EPI_ISL_414023 | hCoV-19/Switzerland/VD5615/2020 | Europe / Switzerland / Vaud            | 2020-03-01 | Laboratoire de Virologie, HUG                                                  | Swiss National Reference Centre for Influenza                                                 | LAUBSCHER Florian et al.                                                                                                                                                                                                                      |
| EPI_ISL_414024 | hCoV-19/Scotland/CVR02/2020     | Europe / United Kingdom / Scotland     | 2020-03-02 | West of Scotland Specialist Virology Centre, NHSGGC                            | MRC-University of Glasgow Centre for Virus Research                                           | Emma Thomson, Antonia Ho; Kathy Smollett, Daniel Mair, Stephen Carmichael, Ana da Silva Filipe; Richard Orton, David L Robertson; Alasdair MacLean, Rory Gunson.                                                                              |
| EPI_ISL_414025 | hCoV-19/Scotland/CVR03/2020     | Europe / United Kingdom / Scotland     | 2020-03-01 | West of Scotland Specialist Virology Centre, NHSGGC                            | MRC-University of Glasgow Centre for Virus Research                                           | Emma Thomson, Antonia Ho; Kathy Smollett, Daniel Mair, Stephen Carmichael, Ana da Silva Filipe; Richard Orton, David L Robertson; Alasdair MacLean, Rory Gunson.                                                                              |
| EPI_ISL_414026 | hCoV-19/Scotland/CVR04/2020     | Europe / United Kingdom / Scotland     | 2020-03-04 | West of Scotland Specialist Virology Centre, NHSGGC                            | MRC-University of Glasgow Centre for Virus Research                                           | Emma Thomson, Antonia Ho; Kathy Smollett, Daniel Mair, Stephen Carmichael, Ana da Silva Filipe; Richard Orton, David L Robertson; Alasdair MacLean, Rory Gunson.                                                                              |

|                |                                       |                                         |            |                                                                                |                                                                                       |                                                                                                                                                                                                                                                                                                                                                                                                                                   |
|----------------|---------------------------------------|-----------------------------------------|------------|--------------------------------------------------------------------------------|---------------------------------------------------------------------------------------|-----------------------------------------------------------------------------------------------------------------------------------------------------------------------------------------------------------------------------------------------------------------------------------------------------------------------------------------------------------------------------------------------------------------------------------|
| EPI_ISL_414027 | hCoV-19/Scotland/CVR05/2020           | Europe / United Kingdom / Scotland      | 2020-03-04 | West of Scotland Specialist Virology Centre, NHSGGC                            | MRC-University of Glasgow Centre for Virus Research                                   | Emma Thomson, Antonia Ho; Kathy Smollett, Daniel Mair, Stephen Carmichael, Ana da Silva Filipe; Richard Orton, David L Robertson; Alasdair MacLean, Rory Gunson.                                                                                                                                                                                                                                                                  |
| EPI_ISL_414040 | hCoV-19/England/200641094/2020        | Europe / United Kingdom / England       | 2020-02-05 | Respiratory Virus Unit, Microbiology Services Colindale, Public Health England | Respiratory Virus Unit, Microbiology Services Colindale, Public Health England        | Monica Galiano, Shahjahan Miah, Angie Lackenby, Omolola Akinbami, Tiina Talts, Leena Bhaw, Richard Myers, Steven Platt, Kirstin Edwards, Jonathan Hubb, Joanna Ellis, Maria Zambon                                                                                                                                                                                                                                                |
| EPI_ISL_414041 | hCoV-19/England/200690245/2020        | Europe / United Kingdom / England       | 2020-02-08 | Respiratory Virus Unit, Microbiology Services Colindale, Public Health England | Respiratory Virus Unit, Microbiology Services Colindale, Public Health England        | Monica Galiano, Shahjahan Miah, Angie Lackenby, Omolola Akinbami, Tiina Talts, Leena Bhaw, Richard Myers, Steven Platt, Kirstin Edwards, Jonathan Hubb, Joanna Ellis, Maria Zambon                                                                                                                                                                                                                                                |
| EPI_ISL_414042 | hCoV-19/England/200690300/2020        | Europe / United Kingdom / England       | 2020-02-08 | Respiratory Virus Unit, Microbiology Services Colindale, Public Health England | Respiratory Virus Unit, Microbiology Services Colindale, Public Health England        | Monica Galiano, Shahjahan Miah, Angie Lackenby, Omolola Akinbami, Tiina Talts, Leena Bhaw, Richard Myers, Steven Platt, Kirstin Edwards, Jonathan Hubb, Joanna Ellis, Maria Zambon                                                                                                                                                                                                                                                |
| EPI_ISL_414043 | hCoV-19/England/200690306/2020        | Europe / United Kingdom / England       | 2020-02-07 | Respiratory Virus Unit, Microbiology Services Colindale, Public Health England | Respiratory Virus Unit, Microbiology Services Colindale, Public Health England        | Monica Galiano, Shahjahan Miah, Angie Lackenby, Omolola Akinbami, Tiina Talts, Leena Bhaw, Richard Myers, Steven Platt, Kirstin Edwards, Jonathan Hubb, Joanna Ellis, Maria Zambon                                                                                                                                                                                                                                                |
| EPI_ISL_414044 | hCoV-19/England/200690756/2020        | Europe / United Kingdom / England       | 2020-02-08 | Respiratory Virus Unit, Microbiology Services Colindale, Public Health England | Respiratory Virus Unit, Microbiology Services Colindale, Public Health England        | Monica Galiano, Shahjahan Miah, Angie Lackenby, Omolola Akinbami, Tiina Talts, Leena Bhaw, Richard Myers, Steven Platt, Kirstin Edwards, Jonathan Hubb, Joanna Ellis, Maria Zambon                                                                                                                                                                                                                                                |
| EPI_ISL_414045 | hCoV-19/Brazil/RJ-314/2020            | South America / Brazil / Rio de Janeiro | 2020-03-04 | LACEN RJ - Laboratório Central de Saúde Pública Noel Nutels                    | Instituto Oswaldo Cruz FIOCRUZ - Laboratory of Respiratory Viruses and Measles (LVRS) | Paola Resende, Alisson Fabri, Jolison Xavier, Sunando Roy, Fernando Motta, Aline Mattos, Milene Miranda, Cristiana Garcia, Bráulio Caetano, Maria Ogrzewalska, Jonathan Lopes, Luciana Appolinario, Maria Nóbrega, Marilda Siqueira                                                                                                                                                                                               |
| EPI_ISL_414363 | hCoV-19/USA/WA-UW15/2020              | North America / USA / Washington        | 2020-03-04 | UW Virology Lab                                                                | UW Virology Lab                                                                       | Pavitra Roychoudhury, Hong Xie, Keith Jerome, Alexander Greninger                                                                                                                                                                                                                                                                                                                                                                 |
| EPI_ISL_414364 | hCoV-19/USA/WA-UW16/2020              | North America / USA / Washington        | 2020-03-05 | UW Virology Lab                                                                | UW Virology Lab                                                                       | Pavitra Roychoudhury, Hong Xie, Keith Jerome, Alexander Greninger                                                                                                                                                                                                                                                                                                                                                                 |
| EPI_ISL_414365 | hCoV-19/USA/WA-UW17/2020              | North America / USA / Washington        | 2020-03-06 | UW Virology Lab                                                                | UW Virology Lab                                                                       | Pavitra Roychoudhury, Hong Xie, Keith Jerome, Alexander Greninger                                                                                                                                                                                                                                                                                                                                                                 |
| EPI_ISL_414366 | hCoV-19/USA/WA-UW18/2020              | North America / USA / Washington        | 2020-03-05 | UW Virology Lab                                                                | UW Virology Lab                                                                       | Pavitra Roychoudhury, Hong Xie, Keith Jerome, Alexander Greninger                                                                                                                                                                                                                                                                                                                                                                 |
| EPI_ISL_414367 | hCoV-19/USA/WA-UW19/2020              | North America / USA / Washington        | 2020-03-05 | UW Virology Lab                                                                | UW Virology Lab                                                                       | Pavitra Roychoudhury, Hong Xie, Keith Jerome, Alexander Greninger                                                                                                                                                                                                                                                                                                                                                                 |
| EPI_ISL_414368 | hCoV-19/USA/WA-UW20/2020              | North America / USA / Washington        | 2020-03-05 | UW Virology Lab                                                                | UW Virology Lab                                                                       | Pavitra Roychoudhury, Hong Xie, Keith Jerome, Alexander Greninger                                                                                                                                                                                                                                                                                                                                                                 |
| EPI_ISL_414369 | hCoV-19/USA/WA-UW21/2020              | North America / USA / Washington        | 2020-03-05 | UW Virology Lab                                                                | UW Virology Lab                                                                       | Pavitra Roychoudhury, Hong Xie, Keith Jerome, Alexander Greninger                                                                                                                                                                                                                                                                                                                                                                 |
| EPI_ISL_414371 | hCoV-19/Iran/Qom257039/2020           | Asia / Iran / Qom                       | 2020-02-16 | Iran National Influenza Center                                                 | Iran National Influenza Center                                                        | Nazanin Zahra Shafiei Jandaghi, Jila Yavarian, Kaveh Sadeghi, Nastaran Ghavvami and Talat Mokhtari Azad                                                                                                                                                                                                                                                                                                                           |
| EPI_ISL_414372 | hCoV-19/Iran/Qom257524/2020           | Asia / Iran / Qom                       | 2020-02-17 | Iran National Influenza Center                                                 | Iran National Influenza Center                                                        | Jila Yavarian, Nazanin Zahra Shafiei Jandaghi, Kaveh Sadeghi, Fatemeh Ajaminejad, Fatemeh Saadatmand and Talat Mokhtari Azad                                                                                                                                                                                                                                                                                                      |
| EPI_ISL_414373 | hCoV-19/Iran/Qom257540/2020           | Asia / Iran / Qom                       | 2020-02-16 | Iran National Influenza Center                                                 | Iran National Influenza Center                                                        | Kaveh Sadeghi, Jila Yavarian, Nazanin Zahra Shafiei Jandaghi, Ahmad Nejadi, Najmeh Parhizghari, Soad Ghabeshi and Talat Mokhtari Azad                                                                                                                                                                                                                                                                                             |
| EPI_ISL_414374 | hCoV-19/Iran/Qom257526/2020           | Asia / Iran / Qom                       | 2020-02-17 | Iran National Influenza Center                                                 | Iran National Influenza Center                                                        | Jila Yavarian, Nazanin Zahra Shafiei Jandaghi, Kaveh Sadeghi, Saeedeh Mahfozi, Simin Abbasi and Talat Mokhtari Azad                                                                                                                                                                                                                                                                                                               |
| EPI_ISL_414375 | hCoV-19/Indonesia/NIHRD651/2020       | Asia / Indonesia / Depok                | 2020-03-01 | National Institute of Health Research and Development                          | National Institute of Health Research and Development                                 | Setiawaty,V; Subangkit; Puspa,KD; Ikawati,HD; Nugraha, AA; Susilarini, NK; Agustiningsih; Ramadhany,R; Pratiwi,E; Hariastuti,NI; Kurniawati,J; Pawestri,HA; Siswanto                                                                                                                                                                                                                                                              |
| EPI_ISL_414376 | hCoV-19/Indonesia/NIHRD655/2020       | Asia / Indonesia / Jakarta              | 2020-03-01 | National Institute of Health Research and Development                          | National Institute of Health Research and Development                                 | Setiawaty,V; Subangkit; Puspa,KD; Ikawati,HD; Nugraha, AA; Susilarini, NK; Agustiningsih; Ramadhany,R; Pratiwi,E; Hariastuti,NI; Kurniawati,J; Pawestri,HA; Siswanto                                                                                                                                                                                                                                                              |
| EPI_ISL_414377 | hCoV-19/Indonesia/NIHRD651/2020       | Asia / Indonesia / Jakarta              | 2020-03-01 | National Institute of Health Research and Development                          | National Institute of Health Research and Development                                 | Setiawaty,V; Subangkit; Puspa,KD; Ikawati,HD; Nugraha, AA; Susilarini, NK; Agustiningsih; Ramadhany,R; Pratiwi,E; Hariastuti,NI; Kurniawati,J; Pawestri,HA; Siswanto                                                                                                                                                                                                                                                              |
| EPI_ISL_414378 | hCoV-19/Singapore/12/2020             | Asia / Singapore                        | 2020-02-17 | National Centre for Infectious Diseases                                        | Programme in Emerging Infectious Diseases, Duke-NUS Medical School                    | Danielle E Anderson, Martin Linster, Yan Zhuang, Jayanthi Jayakumar, Louisa Sun, David CB Lye, Yee Sin Leo, Barnaby E Young, Yvonne CF Su, Gavin JD Smith                                                                                                                                                                                                                                                                         |
| EPI_ISL_414379 | hCoV-19/Singapore/13/2020             | Asia / Singapore                        | 2020-02-18 | National Centre for Infectious Diseases                                        | Programme in Emerging Infectious Diseases, Duke-NUS Medical School                    | Danielle E Anderson, Martin Linster, Yan Zhuang, Jayanthi Jayakumar, David CB Lye, Yee Sin Leo, Barnaby E Young, Yvonne CF Su, Gavin JD Smith                                                                                                                                                                                                                                                                                     |
| EPI_ISL_414380 | hCoV-19/Singapore/14/2020             | Asia / Singapore                        | 2020-02-13 | National Centre for Infectious Diseases                                        | Programme in Emerging Infectious Diseases, Duke-NUS Medical School                    | Danielle E Anderson, Martin Linster, Yan Zhuang, Jayanthi Jayakumar, David CB Lye, Yee Sin Leo, Barnaby E Young, Yvonne CF Su, Gavin JD Smith                                                                                                                                                                                                                                                                                     |
| EPI_ISL_414414 | hCoV-19/Australia/QLD09/2020          | Oceania / Australia / Queensland / Gr   | 2020-02-29 | Pathology Queensland                                                           | Public Health Virology Laboratory                                                     | Bixing Huang, Alyssa Pyke, Amanda De Jong, Andrew Van Den Hurk, Carmel Taylor, David Warrilow, Doris Genge, Elisabeth Gamez, Glen Hewitson, Ian Maxwell Mackay, Inga Sultana, Jamie McMahon, Jean Barcelon, Judy Northhill, Mitchell Finger, Natalie Simpson, Neelima Nair, Peter Burtonclay, Peter Moore, Sarah Wheatley, Sean Moody, Sonja Hall-Mendelin, Timothy Gardam, and Frederick Moore                                   |
| EPI_ISL_414423 | hCoV-19/Netherlands/Gelderland_1/2020 | Europe / Netherlands / Gelderland       | 2020-03-02 | Dutch COVID-19 response team                                                   | Erasmus Medical Center                                                                | David Nieuwenhuijse, Bas Oude Munnink, Reina Sikkema, Claudia Schapendonk, Irina Chestakova, Anne van der Linden, Mark Pronk, Pascal Lexmond, Corien Swaan, Manon Haverkate, Madelief Mollers, Mart Stein, Sandra Kengne Kamga Mobou, Jeroen van Kampen, Jolanda Voermans, Aura Timen, Corine GeurtsvanKessel, Annemiek van der Eijk, Richard Molenkamp, Marion Koopmans, on behalf of the Dutch national COVID-19 response team. |







|                |                                          |                                      |            |                              |                        |                                                                                                                                                                                                                                                                                                                                                                                                                                   |
|----------------|------------------------------------------|--------------------------------------|------------|------------------------------|------------------------|-----------------------------------------------------------------------------------------------------------------------------------------------------------------------------------------------------------------------------------------------------------------------------------------------------------------------------------------------------------------------------------------------------------------------------------|
| EPI_ISL_414444 | hCoV-19/Netherlands/ZuidHolland_1/2020   | Europe / Netherlands / Zuid Holland  | 2020-03-02 | Dutch COVID-19 response team | Erasmus Medical Center | David Nieuwenhuijse, Bas Oude Munnink, Reina Sikkema, Claudia Schapendonk, Irina Chestakova, Anne van der Linden, Mark Pronk, Pascal Lexmond, Corien Swaan, Manon Haverkate, Madelief Mollers, Mart Stein, Sandra Kengne Kamga Mobou, Jeroen van Kampen, Jolanda Voermans, Aura Timen, Corine GeurtsvanKessel, Annemiek van der Eijk, Richard Molenkamp, Marion Koopmans, on behalf of the Dutch national COVID-19 response team. |
| EPI_ISL_414445 | hCoV-19/Netherlands/ZuidHolland_9/2020   | Europe / Netherlands / Zuid Holland  | 2020-03-03 | Dutch COVID-19 response team | Erasmus Medical Center | David Nieuwenhuijse, Bas Oude Munnink, Reina Sikkema, Claudia Schapendonk, Irina Chestakova, Anne van der Linden, Mark Pronk, Pascal Lexmond, Corien Swaan, Manon Haverkate, Madelief Mollers, Mart Stein, Sandra Kengne Kamga Mobou, Jeroen van Kampen, Jolanda Voermans, Aura Timen, Corine GeurtsvanKessel, Annemiek van der Eijk, Richard Molenkamp, Marion Koopmans, on behalf of the Dutch national COVID-19 response team. |
| EPI_ISL_414446 | hCoV-19/Netherlands/ZuidHolland_10/2020  | Europe / Netherlands / Zuid Holland  | 2020-03-03 | Dutch COVID-19 response team | Erasmus Medical Center | David Nieuwenhuijse, Bas Oude Munnink, Reina Sikkema, Claudia Schapendonk, Irina Chestakova, Anne van der Linden, Mark Pronk, Pascal Lexmond, Corien Swaan, Manon Haverkate, Madelief Mollers, Mart Stein, Sandra Kengne Kamga Mobou, Jeroen van Kampen, Jolanda Voermans, Aura Timen, Corine GeurtsvanKessel, Annemiek van der Eijk, Richard Molenkamp, Marion Koopmans, on behalf of the Dutch national COVID-19 response team. |
| EPI_ISL_414448 | hCoV-19/Netherlands/Limburg_5/2020       | Europe / Netherlands / Limburg       | 2020-03-04 | Dutch COVID-19 response team | Erasmus Medical Center | David Nieuwenhuijse, Bas Oude Munnink, Reina Sikkema, Claudia Schapendonk, Irina Chestakova, Anne van der Linden, Mark Pronk, Pascal Lexmond, Corien Swaan, Manon Haverkate, Madelief Mollers, Mart Stein, Sandra Kengne Kamga Mobou, Jeroen van Kampen, Jolanda Voermans, Aura Timen, Corine GeurtsvanKessel, Annemiek van der Eijk, Richard Molenkamp, Marion Koopmans, on behalf of the Dutch national COVID-19 response team. |
| EPI_ISL_414449 | hCoV-19/Netherlands/NoordBrabant_2/2020  | Europe / Netherlands / Noord Brabant | 2020-03-03 | Dutch COVID-19 response team | Erasmus Medical Center | David Nieuwenhuijse, Bas Oude Munnink, Reina Sikkema, Claudia Schapendonk, Irina Chestakova, Anne van der Linden, Mark Pronk, Pascal Lexmond, Corien Swaan, Manon Haverkate, Madelief Mollers, Mart Stein, Sandra Kengne Kamga Mobou, Jeroen van Kampen, Jolanda Voermans, Aura Timen, Corine GeurtsvanKessel, Annemiek van der Eijk, Richard Molenkamp, Marion Koopmans, on behalf of the Dutch national COVID-19 response team. |
| EPI_ISL_414450 | hCoV-19/Netherlands/NoordBrabant_4/2020  | Europe / Netherlands / Noord Brabant | 2020-03-06 | Dutch COVID-19 response team | Erasmus Medical Center | David Nieuwenhuijse, Bas Oude Munnink, Reina Sikkema, Claudia Schapendonk, Irina Chestakova, Anne van der Linden, Mark Pronk, Pascal Lexmond, Corien Swaan, Manon Haverkate, Madelief Mollers, Mart Stein, Sandra Kengne Kamga Mobou, Jeroen van Kampen, Jolanda Voermans, Aura Timen, Corine GeurtsvanKessel, Annemiek van der Eijk, Richard Molenkamp, Marion Koopmans, on behalf of the Dutch national COVID-19 response team. |
| EPI_ISL_414451 | hCoV-19/Netherlands/NoordBrabant_6/2020  | Europe / Netherlands / Noord Brabant | 2020-03-06 | Dutch COVID-19 response team | Erasmus Medical Center | David Nieuwenhuijse, Bas Oude Munnink, Reina Sikkema, Claudia Schapendonk, Irina Chestakova, Anne van der Linden, Mark Pronk, Pascal Lexmond, Corien Swaan, Manon Haverkate, Madelief Mollers, Mart Stein, Sandra Kengne Kamga Mobou, Jeroen van Kampen, Jolanda Voermans, Aura Timen, Corine GeurtsvanKessel, Annemiek van der Eijk, Richard Molenkamp, Marion Koopmans, on behalf of the Dutch national COVID-19 response team. |
| EPI_ISL_414452 | hCoV-19/Netherlands/NoordBrabant_12/2020 | Europe / Netherlands / Noord Brabant | 2020-03-06 | Dutch COVID-19 response team | Erasmus Medical Center | David Nieuwenhuijse, Bas Oude Munnink, Reina Sikkema, Claudia Schapendonk, Irina Chestakova, Anne van der Linden, Mark Pronk, Pascal Lexmond, Corien Swaan, Manon Haverkate, Madelief Mollers, Mart Stein, Sandra Kengne Kamga Mobou, Jeroen van Kampen, Jolanda Voermans, Aura Timen, Corine GeurtsvanKessel, Annemiek van der Eijk, Richard Molenkamp, Marion Koopmans, on behalf of the Dutch national COVID-19 response team. |
| EPI_ISL_414453 | hCoV-19/Netherlands/NoordBrabant_13/2020 | Europe / Netherlands / Noord Brabant | 2020-03-06 | Dutch COVID-19 response team | Erasmus Medical Center | David Nieuwenhuijse, Bas Oude Munnink, Reina Sikkema, Claudia Schapendonk, Irina Chestakova, Anne van der Linden, Mark Pronk, Pascal Lexmond, Corien Swaan, Manon Haverkate, Madelief Mollers, Mart Stein, Sandra Kengne Kamga Mobou, Jeroen van Kampen, Jolanda Voermans, Aura Timen, Corine GeurtsvanKessel, Annemiek van der Eijk, Richard Molenkamp, Marion Koopmans, on behalf of the Dutch national COVID-19 response team. |
| EPI_ISL_414454 | hCoV-19/Netherlands/NoordBrabant_14/2020 | Europe / Netherlands / Noord Brabant | 2020-03-05 | Dutch COVID-19 response team | Erasmus Medical Center | David Nieuwenhuijse, Bas Oude Munnink, Reina Sikkema, Claudia Schapendonk, Irina Chestakova, Anne van der Linden, Mark Pronk, Pascal Lexmond, Corien Swaan, Manon Haverkate, Madelief Mollers, Mart Stein, Sandra Kengne Kamga Mobou, Jeroen van Kampen, Jolanda Voermans, Aura Timen, Corine GeurtsvanKessel, Annemiek van der Eijk, Richard Molenkamp, Marion Koopmans, on behalf of the Dutch national COVID-19 response team. |

|                |                                          |                                      |            |                              |                        |                                                                                                                                                                                                                                                                                                                                                                                                                                   |
|----------------|------------------------------------------|--------------------------------------|------------|------------------------------|------------------------|-----------------------------------------------------------------------------------------------------------------------------------------------------------------------------------------------------------------------------------------------------------------------------------------------------------------------------------------------------------------------------------------------------------------------------------|
| EPI_ISL_414455 | hCoV-19/Netherlands/NoordBrabant_15/2020 | Europe / Netherlands / Noord Brabant | 2020-03-06 | Dutch COVID-19 response team | Erasmus Medical Center | David Nieuwenhuijse, Bas Oude Munnink, Reina Sikkema, Claudia Schapendonk, Irina Chestakova, Anne van der Linden, Mark Pronk, Pascal Lexmond, Corien Swaan, Manon Haverkate, Madelief Mollers, Mart Stein, Sandra Kengne Kamga Mobou, Jeroen van Kampen, Jolanda Voermans, Aura Timen, Corine GeurtsvanKessel, Annemiek van der Eijk, Richard Molenkamp, Marion Koopmans, on behalf of the Dutch national COVID-19 response team. |
| EPI_ISL_414456 | hCoV-19/Netherlands/NoordBrabant_16/2020 | Europe / Netherlands / Noord Brabant | 2020-03-04 | Dutch COVID-19 response team | Erasmus Medical Center | David Nieuwenhuijse, Bas Oude Munnink, Reina Sikkema, Claudia Schapendonk, Irina Chestakova, Anne van der Linden, Mark Pronk, Pascal Lexmond, Corien Swaan, Manon Haverkate, Madelief Mollers, Mart Stein, Sandra Kengne Kamga Mobou, Jeroen van Kampen, Jolanda Voermans, Aura Timen, Corine GeurtsvanKessel, Annemiek van der Eijk, Richard Molenkamp, Marion Koopmans, on behalf of the Dutch national COVID-19 response team. |
| EPI_ISL_414457 | hCoV-19/Netherlands/NoordBrabant_17/2020 | Europe / Netherlands / Noord Brabant | 2020-03-06 | Dutch COVID-19 response team | Erasmus Medical Center | David Nieuwenhuijse, Bas Oude Munnink, Reina Sikkema, Claudia Schapendonk, Irina Chestakova, Anne van der Linden, Mark Pronk, Pascal Lexmond, Corien Swaan, Manon Haverkate, Madelief Mollers, Mart Stein, Sandra Kengne Kamga Mobou, Jeroen van Kampen, Jolanda Voermans, Aura Timen, Corine GeurtsvanKessel, Annemiek van der Eijk, Richard Molenkamp, Marion Koopmans, on behalf of the Dutch national COVID-19 response team. |
| EPI_ISL_414458 | hCoV-19/Netherlands/NoordBrabant_18/2020 | Europe / Netherlands / Noord Brabant | 2020-03-05 | Dutch COVID-19 response team | Erasmus Medical Center | David Nieuwenhuijse, Bas Oude Munnink, Reina Sikkema, Claudia Schapendonk, Irina Chestakova, Anne van der Linden, Mark Pronk, Pascal Lexmond, Corien Swaan, Manon Haverkate, Madelief Mollers, Mart Stein, Sandra Kengne Kamga Mobou, Jeroen van Kampen, Jolanda Voermans, Aura Timen, Corine GeurtsvanKessel, Annemiek van der Eijk, Richard Molenkamp, Marion Koopmans, on behalf of the Dutch national COVID-19 response team. |
| EPI_ISL_414459 | hCoV-19/Netherlands/NoordBrabant_19/2020 | Europe / Netherlands / Noord Brabant | 2020-03-06 | Dutch COVID-19 response team | Erasmus Medical Center | David Nieuwenhuijse, Bas Oude Munnink, Reina Sikkema, Claudia Schapendonk, Irina Chestakova, Anne van der Linden, Mark Pronk, Pascal Lexmond, Corien Swaan, Manon Haverkate, Madelief Mollers, Mart Stein, Sandra Kengne Kamga Mobou, Jeroen van Kampen, Jolanda Voermans, Aura Timen, Corine GeurtsvanKessel, Annemiek van der Eijk, Richard Molenkamp, Marion Koopmans, on behalf of the Dutch national COVID-19 response team. |
| EPI_ISL_414460 | hCoV-19/Netherlands/Overijssel_2/2020    | Europe / Netherlands / Overijssel    | 2020-03-03 | Dutch COVID-19 response team | Erasmus Medical Center | David Nieuwenhuijse, Bas Oude Munnink, Reina Sikkema, Claudia Schapendonk, Irina Chestakova, Anne van der Linden, Mark Pronk, Pascal Lexmond, Corien Swaan, Manon Haverkate, Madelief Mollers, Mart Stein, Sandra Kengne Kamga Mobou, Jeroen van Kampen, Jolanda Voermans, Aura Timen, Corine GeurtsvanKessel, Annemiek van der Eijk, Richard Molenkamp, Marion Koopmans, on behalf of the Dutch national COVID-19 response team. |
| EPI_ISL_414461 | hCoV-19/Netherlands/Utrecht_6/2020       | Europe / Netherlands / Utrecht       | 2020-03-04 | Dutch COVID-19 response team | Erasmus Medical Center | David Nieuwenhuijse, Bas Oude Munnink, Reina Sikkema, Claudia Schapendonk, Irina Chestakova, Anne van der Linden, Mark Pronk, Pascal Lexmond, Corien Swaan, Manon Haverkate, Madelief Mollers, Mart Stein, Sandra Kengne Kamga Mobou, Jeroen van Kampen, Jolanda Voermans, Aura Timen, Corine GeurtsvanKessel, Annemiek van der Eijk, Richard Molenkamp, Marion Koopmans, on behalf of the Dutch national COVID-19 response team. |
| EPI_ISL_414462 | hCoV-19/Netherlands/Utrecht_12/2020      | Europe / Netherlands / Utrecht       | 2020-03-04 | Dutch COVID-19 response team | Erasmus Medical Center | David Nieuwenhuijse, Bas Oude Munnink, Reina Sikkema, Claudia Schapendonk, Irina Chestakova, Anne van der Linden, Mark Pronk, Pascal Lexmond, Corien Swaan, Manon Haverkate, Madelief Mollers, Mart Stein, Sandra Kengne Kamga Mobou, Jeroen van Kampen, Jolanda Voermans, Aura Timen, Corine GeurtsvanKessel, Annemiek van der Eijk, Richard Molenkamp, Marion Koopmans, on behalf of the Dutch national COVID-19 response team. |
| EPI_ISL_414463 | hCoV-19/Netherlands/Utrecht_13/2020      | Europe / Netherlands / Utrecht       | 2020-03-04 | Dutch COVID-19 response team | Erasmus Medical Center | David Nieuwenhuijse, Bas Oude Munnink, Reina Sikkema, Claudia Schapendonk, Irina Chestakova, Anne van der Linden, Mark Pronk, Pascal Lexmond, Corien Swaan, Manon Haverkate, Madelief Mollers, Mart Stein, Sandra Kengne Kamga Mobou, Jeroen van Kampen, Jolanda Voermans, Aura Timen, Corine GeurtsvanKessel, Annemiek van der Eijk, Richard Molenkamp, Marion Koopmans, on behalf of the Dutch national COVID-19 response team. |
| EPI_ISL_414464 | hCoV-19/Netherlands/Utrecht_14/2020      | Europe / Netherlands / Utrecht       | 2020-03-04 | Dutch COVID-19 response team | Erasmus Medical Center | David Nieuwenhuijse, Bas Oude Munnink, Reina Sikkema, Claudia Schapendonk, Irina Chestakova, Anne van der Linden, Mark Pronk, Pascal Lexmond, Corien Swaan, Manon Haverkate, Madelief Mollers, Mart Stein, Sandra Kengne Kamga Mobou, Jeroen van Kampen, Jolanda Voermans, Aura Timen, Corine GeurtsvanKessel, Annemiek van der Eijk, Richard Molenkamp, Marion Koopmans, on behalf of the Dutch national COVID-19 response team. |

|                |                                         |                                       |            |                                                                                  |                                                                                                                        |                                                                                                                                                                                                                                                                                                                                                                                                                                   |
|----------------|-----------------------------------------|---------------------------------------|------------|----------------------------------------------------------------------------------|------------------------------------------------------------------------------------------------------------------------|-----------------------------------------------------------------------------------------------------------------------------------------------------------------------------------------------------------------------------------------------------------------------------------------------------------------------------------------------------------------------------------------------------------------------------------|
| EPI_ISL_414465 | hCoV-19/Netherlands/ZuidHolland_5/2020  | Europe / Netherlands / Zuid Holland   | 2020-03-04 | Dutch COVID-19 response team                                                     | Erasmus Medical Center                                                                                                 | David Nieuwenhuijse, Bas Oude Munnink, Reina Sikkema, Claudia Schapendonk, Irina Chestakova, Anne van der Linden, Mark Pronk, Pascal Lexmond, Corien Swaan, Manon Haverkate, Madelief Mollers, Mart Stein, Sandra Kengne Kamga Mobou, Jeroen van Kampen, Jolanda Voermans, Aura Timen, Corine GeurtsvanKessel, Annemiek van der Eijk, Richard Molenkamp, Marion Koopmans, on behalf of the Dutch national COVID-19 response team. |
| EPI_ISL_414466 | hCoV-19/Netherlands/ZuidHolland_6/2020  | Europe / Netherlands / Zuid Holland   | 2020-03-04 | Dutch COVID-19 response team                                                     | Erasmus Medical Center                                                                                                 | David Nieuwenhuijse, Bas Oude Munnink, Reina Sikkema, Claudia Schapendonk, Irina Chestakova, Anne van der Linden, Mark Pronk, Pascal Lexmond, Corien Swaan, Manon Haverkate, Madelief Mollers, Mart Stein, Sandra Kengne Kamga Mobou, Jeroen van Kampen, Jolanda Voermans, Aura Timen, Corine GeurtsvanKessel, Annemiek van der Eijk, Richard Molenkamp, Marion Koopmans, on behalf of the Dutch national COVID-19 response team. |
| EPI_ISL_414467 | hCoV-19/Netherlands/ZuidHolland_7/2020  | Europe / Netherlands / Zuid Holland   | 2020-03-05 | Dutch COVID-19 response team                                                     | Erasmus Medical Center                                                                                                 | David Nieuwenhuijse, Bas Oude Munnink, Reina Sikkema, Claudia Schapendonk, Irina Chestakova, Anne van der Linden, Mark Pronk, Pascal Lexmond, Corien Swaan, Manon Haverkate, Madelief Mollers, Mart Stein, Sandra Kengne Kamga Mobou, Jeroen van Kampen, Jolanda Voermans, Aura Timen, Corine GeurtsvanKessel, Annemiek van der Eijk, Richard Molenkamp, Marion Koopmans, on behalf of the Dutch national COVID-19 response team. |
| EPI_ISL_414468 | hCoV-19/Netherlands/ZuidHolland_8/2020  | Europe / Netherlands / Zuid Holland   | 2020-03-06 | Dutch COVID-19 response team                                                     | Erasmus Medical Center                                                                                                 | David Nieuwenhuijse, Bas Oude Munnink, Reina Sikkema, Claudia Schapendonk, Irina Chestakova, Anne van der Linden, Mark Pronk, Pascal Lexmond, Corien Swaan, Manon Haverkate, Madelief Mollers, Mart Stein, Sandra Kengne Kamga Mobou, Jeroen van Kampen, Jolanda Voermans, Aura Timen, Corine GeurtsvanKessel, Annemiek van der Eijk, Richard Molenkamp, Marion Koopmans, on behalf of the Dutch national COVID-19 response team. |
| EPI_ISL_414469 | hCoV-19/Netherlands/ZuidHolland_11/2020 | Europe / Netherlands / Zuid Holland   | 2020-03-04 | Dutch COVID-19 response team                                                     | Erasmus Medical Center                                                                                                 | David Nieuwenhuijse, Bas Oude Munnink, Reina Sikkema, Claudia Schapendonk, Irina Chestakova, Anne van der Linden, Mark Pronk, Pascal Lexmond, Corien Swaan, Manon Haverkate, Madelief Mollers, Mart Stein, Sandra Kengne Kamga Mobou, Jeroen van Kampen, Jolanda Voermans, Aura Timen, Corine GeurtsvanKessel, Annemiek van der Eijk, Richard Molenkamp, Marion Koopmans, on behalf of the Dutch national COVID-19 response team. |
| EPI_ISL_414470 | hCoV-19/Netherlands/ZuidHolland_13/2020 | Europe / Netherlands / Zuid Holland   | 2020-03-06 | Dutch COVID-19 response team                                                     | Erasmus Medical Center                                                                                                 | David Nieuwenhuijse, Bas Oude Munnink, Reina Sikkema, Claudia Schapendonk, Irina Chestakova, Anne van der Linden, Mark Pronk, Pascal Lexmond, Corien Swaan, Manon Haverkate, Madelief Mollers, Mart Stein, Sandra Kengne Kamga Mobou, Jeroen van Kampen, Jolanda Voermans, Aura Timen, Corine GeurtsvanKessel, Annemiek van der Eijk, Richard Molenkamp, Marion Koopmans, on behalf of the Dutch national COVID-19 response team. |
| EPI_ISL_414471 | hCoV-19/Netherlands/ZuidHolland_14/2020 | Europe / Netherlands / Zuid Holland   | 2020-03-05 | Dutch COVID-19 response team                                                     | Erasmus Medical Center                                                                                                 | David Nieuwenhuijse, Bas Oude Munnink, Reina Sikkema, Claudia Schapendonk, Irina Chestakova, Anne van der Linden, Mark Pronk, Pascal Lexmond, Corien Swaan, Manon Haverkate, Madelief Mollers, Mart Stein, Sandra Kengne Kamga Mobou, Jeroen van Kampen, Jolanda Voermans, Aura Timen, Corine GeurtsvanKessel, Annemiek van der Eijk, Richard Molenkamp, Marion Koopmans, on behalf of the Dutch national COVID-19 response team. |
| EPI_ISL_414475 | hCoV-19/Iran/12Bj/2020                  | Asia / Iran / Tehran                  | 2020-03-01 | Iran National Influenza Center                                                   | Iran National Influenza Center                                                                                         | Jila Yavarian, Nazanin Zahra Shafiei Jandaghi, Ahmad Nejati, Simin Abbasi and Talat Mokhtari Azad                                                                                                                                                                                                                                                                                                                                 |
| EPI_ISL_414476 | hCoV-19/USA/NY1-PV08001/2020            | North America / USA / New York        | 2020-02-29 | MSHS Clinical Microbiology Laboratories                                          | MSHS Pathogen Surveillance Program                                                                                     | Gopi Patel, Emilia Sordillo, Melissa Gitman, Alberto Paniz-mondolfi, Matthew Hernandez, Shelcie Fabre, Jose Polanco, Ana Sylvia Gonzalez-Reiche, Zenab Khan, Nancy Francoeur, Melissa Smith, Robert Sebra, Lisa Miorin, Wen-chun Liu, Randy Albrecht, Judith Aberg, Florian Krammer, Adolfo Garcia-Sarstre, Viviana Simon, Harm van Bakel                                                                                         |
| EPI_ISL_414477 | hCoV-19/Czech Republic/951/2020         | Europe / Czech Republic / Usti nad L: | 2020-03-01 | The National Institute of Public Health Center for Epidemiology and Microbiology | State Veterinary Institute Prague                                                                                      | Alexander Nagy, Oldrich Bartos, Helena Jirincova, Klara Labska, Ludmila Novakova, Olga Storkanova, Dusan Trnka, Jaromira Vecerova                                                                                                                                                                                                                                                                                                 |
| EPI_ISL_414479 | hCoV-19/USA/CruiseA-19/2020             | North America / USA                   | 2020-02-18 | unknown                                                                          | Pathogen Discovery, Respiratory Viruses Branch, Division of Viral Diseases, Centers for Disease Control and Prevention | Ying Tao, Krista Queen, Clinton R. Paden, Anna Uehara, Jing Zhang, Yan Li, Mary S. Keckler, Alison S. Lauffer Halpin, Haibin Wang, Jasmine Padilla, Justin Lee, Christopher A. Elkins, Susan I. Gerber, Suxiang Tong                                                                                                                                                                                                              |
| EPI_ISL_414480 | hCoV-19/USA/CruiseA-21/2020             | North America / USA                   | 2020-02-21 | unknown                                                                          | Pathogen Discovery, Respiratory Viruses Branch, Division of Viral Diseases, Centers for Disease Control and Prevention | Ying Tao, Krista Queen, Clinton R. Paden, Anna Uehara, Jing Zhang, Yan Li, Mary S. Keckler, Alison S. Lauffer Halpin, Haibin Wang, Jasmine Padilla, Justin Lee, Christopher A. Elkins, Susan I. Gerber, Suxiang Tong                                                                                                                                                                                                              |
| EPI_ISL_414481 | hCoV-19/USA/CruiseA-22/2020             | North America / USA                   | 2020-02-21 | unknown                                                                          | Pathogen Discovery, Respiratory Viruses Branch, Division of Viral Diseases, Centers for Disease Control and Prevention | Ying Tao, Krista Queen, Clinton R. Paden, Anna Uehara, Jing Zhang, Yan Li, Mary S. Keckler, Alison S. Lauffer Halpin, Haibin Wang, Jasmine Padilla, Justin Lee, Christopher A. Elkins, Susan I. Gerber, Suxiang Tong                                                                                                                                                                                                              |
| EPI_ISL_414482 | hCoV-19/USA/CruiseA-23/2020             | North America / USA                   | 2020-02-18 | unknown                                                                          | Pathogen Discovery, Respiratory Viruses Branch, Division of Viral Diseases, Centers for Disease Control and Prevention | Krista Queen, Anna Uehara, Ying Tao, Clinton R. Paden, Jing Zhang, Yan Li, Haibin Wang, Shifaq Kamili, Xiaoyan Lu, Brian Lynch, Senthil Kumar K. Sakthivel, Brett L. Whitaker, Lijuan Wang, Janna R. Murray, Jasmine Padilla, Justin Lee, Susan I. Gerber, Stephen Lindstrom, Suxiang Tong                                                                                                                                        |

|                |                                          |                                      |            |                                                                                           |                                                                                                                        |                                                                                                                                                                                                                                                                                                                                                                                                                                   |
|----------------|------------------------------------------|--------------------------------------|------------|-------------------------------------------------------------------------------------------|------------------------------------------------------------------------------------------------------------------------|-----------------------------------------------------------------------------------------------------------------------------------------------------------------------------------------------------------------------------------------------------------------------------------------------------------------------------------------------------------------------------------------------------------------------------------|
| EPI_ISL_414483 | hCoV-19/USA/CruiseA-24/2020              | North America / USA                  | 2020-02-17 | unknown                                                                                   | Pathogen Discovery, Respiratory Viruses Branch, Division of Viral Diseases, Centers for Disease Control and Prevention | Krista Queen, Anna Uehara, Ying Tao, Clinton R. Paden, Jing Zhang, Yan Li, Haibin Wang, Shifaq Kamili, Xiaoyan Lu, Brian Lynch, Senthil Kumar K. Sakhivel, Brett L. Whitaker, Lijuan Wang, Janna' R. Murray, Jasmine Padilla, Justin Lee, Susan I. Gerber, Stephen Lindstrom, Suxiang Tong                                                                                                                                        |
| EPI_ISL_414484 | hCoV-19/USA/CruiseA-25/2020              | North America / USA                  | 2020-02-17 | unknown                                                                                   | Pathogen Discovery, Respiratory Viruses Branch, Division of Viral Diseases, Centers for Disease Control and Prevention | Krista Queen, Anna Uehara, Ying Tao, Clinton R. Paden, Jing Zhang, Yan Li, Haibin Wang, Shifaq Kamili, Xiaoyan Lu, Brian Lynch, Senthil Kumar K. Sakhivel, Brett L. Whitaker, Lijuan Wang, Janna' R. Murray, Jasmine Padilla, Justin Lee, Susan I. Gerber, Stephen Lindstrom, Suxiang Tong                                                                                                                                        |
| EPI_ISL_414485 | hCoV-19/USA/CruiseA-26/2020              | North America / USA                  | 2020-02-24 | unknown                                                                                   | Pathogen Discovery, Respiratory Viruses Branch, Division of Viral Diseases, Centers for Disease Control and Prevention | Krista Queen, Anna Uehara, Ying Tao, Clinton R. Paden, Jing Zhang, Yan Li, Haibin Wang, Shifaq Kamili, Xiaoyan Lu, Brian Lynch, Senthil Kumar K. Sakhivel, Brett L. Whitaker, Lijuan Wang, Janna' R. Murray, Jasmine Padilla, Justin Lee, Susan I. Gerber, Stephen Lindstrom, Suxiang Tong                                                                                                                                        |
| EPI_ISL_414486 | hCoV-19/Wales/PHW03/2020                 | Europe / United Kingdom / Wales      | 2020-03-07 | Wales Specialist Virology Centre                                                          | Public Health Wales Microbiology Cardiff                                                                               | Catherine Moore, Joanne Watkins, Sally Corden, Tom Connor, Michael Carr, Gabriel Gonzalez, Jonathan Dean, Suzie Coughlan, Alison Murphy, Kevin Byrne, Ken Wolfe, Jeff Connell, Brendan Loftus, Cillian F De Gascun                                                                                                                                                                                                                |
| EPI_ISL_414487 | hCoV-19/Ireland/COR-20134/2020           | Europe / Ireland / Cork              | 2020-03-04 | UCD National Virus Reference Laboratory                                                   | UCD National Virus Reference Laboratory                                                                                | Catherine Moore, Joanne Watkins, Sally Corden, Tom Connor                                                                                                                                                                                                                                                                                                                                                                         |
| EPI_ISL_414488 | hCoV-19/Wales/PHW05/2020                 | Europe / United Kingdom / Wales      | 2020-03-08 | Wales Specialist Virology Centre                                                          | Public Health Wales Microbiology Cardiff                                                                               | David Navarro, Maria Alma Bracho, Giuseppe D'Auria, Griselda De Marco, Neris Garcia-Gonzalez, Fernando Gonzalez-Candelas                                                                                                                                                                                                                                                                                                          |
| EPI_ISL_414495 | hCoV-19/Spain/Valencia1/2020             | Europe / Spain / Comunitat Valencian | 2020-03-08 | Servicio Microbiologia. Hospital Clínico Universitario. Valencia.                         | Sequencing and Bioinformatics Service. Molecular Epidemiology Laboratory. FISABIO-Public Health                        | David Navarro, Maria Alma Bracho, Giuseppe D'Auria, Griselda De Marco, Neris Garcia-Gonzalez, Fernando Gonzalez-Candelas                                                                                                                                                                                                                                                                                                          |
| EPI_ISL_414496 | hCoV-19/Spain/Valencia2/2020             | Europe / Spain / Comunitat Valencian | 2020-03-04 | Servicio Microbiologia. Hospital Clínico Universitario. Valencia.                         | Sequencing and Bioinformatics Service. Molecular Epidemiology Laboratory. FISABIO-Public Health                        | Ortwin Adams, Marcel Andree, Alexander Dilthey, Torsten Feldt, Sandra Hauka, Torsten Houwaart, Björn-Erik Jensen, Detlef Kindgen-Milles, Malte Kohns                                                                                                                                                                                                                                                                              |
| EPI_ISL_414497 | hCoV-19/Germany/NRW-02-1/2020            | Europe / Germany / North Rhine Wes   | 2020-02-25 | Center of Medical Microbiology, Virology, and Hospital Hygiene, University of Duesseldorf | Center of Medical Microbiology, Virology, and Hospital Hygiene, University of Duesseldorf                              | Vasconcelos, Klaus Pfeffer, Tina Senff, Daniel Strelow, Jörg Timm, Andreas Walker, Tobias Wienemann                                                                                                                                                                                                                                                                                                                               |
| EPI_ISL_414498 | hCoV-19/Germany/NRW-03/2020              | Europe / Germany / North Rhine Wes   | 2020-02-26 | Center of Medical Microbiology, Virology, and Hospital Hygiene, University of Duesseldorf | Center of Medical Microbiology, Virology, and Hospital Hygiene, University of Duesseldorf                              | Ortwin Adams, Marcel Andree, Alexander Dilthey, Torsten Feldt, Sandra Hauka, Torsten Houwaart, Björn-Erik Jensen, Detlef Kindgen-Milles, Malte Kohns                                                                                                                                                                                                                                                                              |
| EPI_ISL_414499 | hCoV-19/Germany/NRW-04/2020              | Europe / Germany / North Rhine Wes   | 2020-02-26 | Center of Medical Microbiology, Virology, and Hospital Hygiene, University of Duesseldorf | Center of Medical Microbiology, Virology, and Hospital Hygiene, University of Duesseldorf                              | Vasconcelos, Klaus Pfeffer, Tina Senff, Daniel Strelow, Jörg Timm, Andreas Walker, Tobias Wienemann                                                                                                                                                                                                                                                                                                                               |
| EPI_ISL_414537 | hCoV-19/Netherlands/NoordBrabant_28/2020 | Europe / Netherlands / Noord Brabant | 2020-03-08 | Dutch COVID-19 response team                                                              | Erasmus Medical Center                                                                                                 | David Nieuwenhuijse, Bas Oude Munnink, Reina Sikkema, Claudia Schapendonk, Irina Chestakova, Anne van der Linden, Mark Pronk, Pascal Lexmond, Corien Swaan, Manon Haverkate, Madelief Mollers, Mart Stein, Sandra Kengne Kamga Mobou, Jeroen van Kampen, Jolanda Voermans, Aura Timen, Corine GeurtsvanKessel, Annemiek van der Eijk, Richard Molenkamp, Marion Koopmans, on behalf of the Dutch national COVID-19 response team. |
| EPI_ISL_414538 | hCoV-19/Netherlands/NoordBrabant_29/2020 | Europe / Netherlands / Noord Brabant | 2020-03-08 | Dutch COVID-19 response team                                                              | Erasmus Medical Center                                                                                                 | David Nieuwenhuijse, Bas Oude Munnink, Reina Sikkema, Claudia Schapendonk, Irina Chestakova, Anne van der Linden, Mark Pronk, Pascal Lexmond, Corien Swaan, Manon Haverkate, Madelief Mollers, Mart Stein, Sandra Kengne Kamga Mobou, Jeroen van Kampen, Jolanda Voermans, Aura Timen, Corine GeurtsvanKessel, Annemiek van der Eijk, Richard Molenkamp, Marion Koopmans, on behalf of the Dutch national COVID-19 response team. |
| EPI_ISL_414539 | hCoV-19/Netherlands/NoordBrabant_30/2020 | Europe / Netherlands / Noord Brabant | 2020-03-08 | Dutch COVID-19 response team                                                              | Erasmus Medical Center                                                                                                 | David Nieuwenhuijse, Bas Oude Munnink, Reina Sikkema, Claudia Schapendonk, Irina Chestakova, Anne van der Linden, Mark Pronk, Pascal Lexmond, Corien Swaan, Manon Haverkate, Madelief Mollers, Mart Stein, Sandra Kengne Kamga Mobou, Jeroen van Kampen, Jolanda Voermans, Aura Timen, Corine GeurtsvanKessel, Annemiek van der Eijk, Richard Molenkamp, Marion Koopmans, on behalf of the Dutch national COVID-19 response team. |
| EPI_ISL_414540 | hCoV-19/Netherlands/NoordBrabant_31/2020 | Europe / Netherlands / Noord Brabant | 2020-03-08 | Dutch COVID-19 response team                                                              | Erasmus Medical Center                                                                                                 | David Nieuwenhuijse, Bas Oude Munnink, Reina Sikkema, Claudia Schapendonk, Irina Chestakova, Anne van der Linden, Mark Pronk, Pascal Lexmond, Corien Swaan, Manon Haverkate, Madelief Mollers, Mart Stein, Sandra Kengne Kamga Mobou, Jeroen van Kampen, Jolanda Voermans, Aura Timen, Corine GeurtsvanKessel, Annemiek van der Eijk, Richard Molenkamp, Marion Koopmans, on behalf of the Dutch national COVID-19 response team. |
| EPI_ISL_414541 | hCoV-19/Netherlands/NoordBrabant_32/2020 | Europe / Netherlands / Noord Brabant | 2020-03-08 | Dutch COVID-19 response team                                                              | Erasmus Medical Center                                                                                                 | David Nieuwenhuijse, Bas Oude Munnink, Reina Sikkema, Claudia Schapendonk, Irina Chestakova, Anne van der Linden, Mark Pronk, Pascal Lexmond, Corien Swaan, Manon Haverkate, Madelief Mollers, Mart Stein, Sandra Kengne Kamga Mobou, Jeroen van Kampen, Jolanda Voermans, Aura Timen, Corine GeurtsvanKessel, Annemiek van der Eijk, Richard Molenkamp, Marion Koopmans, on behalf of the Dutch national COVID-19 response team. |

|                |                                          |                                                 |                              |                        |                                                                                                                                                                                                                                                                                                                                                                                                                                   |
|----------------|------------------------------------------|-------------------------------------------------|------------------------------|------------------------|-----------------------------------------------------------------------------------------------------------------------------------------------------------------------------------------------------------------------------------------------------------------------------------------------------------------------------------------------------------------------------------------------------------------------------------|
| EPI_ISL_414542 | hCoV-19/Netherlands/NoordBrabant_33/2020 | Europe / Netherlands / Noord Brabant 2020-03    | Dutch COVID-19 response team | Erasmus Medical Center | David Nieuwenhuijse, Bas Oude Munnink, Reina Sikkema, Claudia Schapendonk, Irina Chestakova, Anne van der Linden, Mark Pronk, Pascal Lexmond, Corien Swaan, Manon Haverkate, Madelief Mollers, Mart Stein, Sandra Kengne Kamga Mobou, Jeroen van Kampen, Jolanda Voermans, Aura Timen, Corine GeurtsvanKessel, Annemiek van der Eijk, Richard Molenkamp, Marion Koopmans, on behalf of the Dutch national COVID-19 response team. |
| EPI_ISL_414543 | hCoV-19/Netherlands/NoordBrabant_34/2020 | Europe / Netherlands / Noord Brabant 2020-03    | Dutch COVID-19 response team | Erasmus Medical Center | David Nieuwenhuijse, Bas Oude Munnink, Reina Sikkema, Claudia Schapendonk, Irina Chestakova, Anne van der Linden, Mark Pronk, Pascal Lexmond, Corien Swaan, Manon Haverkate, Madelief Mollers, Mart Stein, Sandra Kengne Kamga Mobou, Jeroen van Kampen, Jolanda Voermans, Aura Timen, Corine GeurtsvanKessel, Annemiek van der Eijk, Richard Molenkamp, Marion Koopmans, on behalf of the Dutch national COVID-19 response team. |
| EPI_ISL_414544 | hCoV-19/Netherlands/NoordBrabant_35/2020 | Europe / Netherlands / Noord Brabant 2020-03-09 | Dutch COVID-19 response team | Erasmus Medical Center | David Nieuwenhuijse, Bas Oude Munnink, Reina Sikkema, Claudia Schapendonk, Irina Chestakova, Anne van der Linden, Mark Pronk, Pascal Lexmond, Corien Swaan, Manon Haverkate, Madelief Mollers, Mart Stein, Sandra Kengne Kamga Mobou, Jeroen van Kampen, Jolanda Voermans, Aura Timen, Corine GeurtsvanKessel, Annemiek van der Eijk, Richard Molenkamp, Marion Koopmans, on behalf of the Dutch national COVID-19 response team. |
| EPI_ISL_414545 | hCoV-19/Netherlands/NoordBrabant_36/2020 | Europe / Netherlands / Noord Brabant 2020-03-03 | Dutch COVID-19 response team | Erasmus Medical Center | David Nieuwenhuijse, Bas Oude Munnink, Reina Sikkema, Claudia Schapendonk, Irina Chestakova, Anne van der Linden, Mark Pronk, Pascal Lexmond, Corien Swaan, Manon Haverkate, Madelief Mollers, Mart Stein, Sandra Kengne Kamga Mobou, Jeroen van Kampen, Jolanda Voermans, Aura Timen, Corine GeurtsvanKessel, Annemiek van der Eijk, Richard Molenkamp, Marion Koopmans, on behalf of the Dutch national COVID-19 response team. |
| EPI_ISL_414546 | hCoV-19/Netherlands/NoordBrabant_37/2020 | Europe / Netherlands / Noord Brabant 2020-03-06 | Dutch COVID-19 response team | Erasmus Medical Center | David Nieuwenhuijse, Bas Oude Munnink, Reina Sikkema, Claudia Schapendonk, Irina Chestakova, Anne van der Linden, Mark Pronk, Pascal Lexmond, Corien Swaan, Manon Haverkate, Madelief Mollers, Mart Stein, Sandra Kengne Kamga Mobou, Jeroen van Kampen, Jolanda Voermans, Aura Timen, Corine GeurtsvanKessel, Annemiek van der Eijk, Richard Molenkamp, Marion Koopmans, on behalf of the Dutch national COVID-19 response team. |
| EPI_ISL_414547 | hCoV-19/Netherlands/NoordBrabant_38/2020 | Europe / Netherlands / Noord Brabant 2020-03-06 | Dutch COVID-19 response team | Erasmus Medical Center | David Nieuwenhuijse, Bas Oude Munnink, Reina Sikkema, Claudia Schapendonk, Irina Chestakova, Anne van der Linden, Mark Pronk, Pascal Lexmond, Corien Swaan, Manon Haverkate, Madelief Mollers, Mart Stein, Sandra Kengne Kamga Mobou, Jeroen van Kampen, Jolanda Voermans, Aura Timen, Corine GeurtsvanKessel, Annemiek van der Eijk, Richard Molenkamp, Marion Koopmans, on behalf of the Dutch national COVID-19 response team. |
| EPI_ISL_414548 | hCoV-19/Netherlands/NoordBrabant_39/2020 | Europe / Netherlands / Noord Brabant 2020-03-04 | Dutch COVID-19 response team | Erasmus Medical Center | David Nieuwenhuijse, Bas Oude Munnink, Reina Sikkema, Claudia Schapendonk, Irina Chestakova, Anne van der Linden, Mark Pronk, Pascal Lexmond, Corien Swaan, Manon Haverkate, Madelief Mollers, Mart Stein, Sandra Kengne Kamga Mobou, Jeroen van Kampen, Jolanda Voermans, Aura Timen, Corine GeurtsvanKessel, Annemiek van der Eijk, Richard Molenkamp, Marion Koopmans, on behalf of the Dutch national COVID-19 response team. |
| EPI_ISL_414549 | hCoV-19/Netherlands/NoordHolland_2/2020  | Europe / Netherlands / Noord Holland 2020-03-03 | Dutch COVID-19 response team | Erasmus Medical Center | David Nieuwenhuijse, Bas Oude Munnink, Reina Sikkema, Claudia Schapendonk, Irina Chestakova, Anne van der Linden, Mark Pronk, Pascal Lexmond, Corien Swaan, Manon Haverkate, Madelief Mollers, Mart Stein, Sandra Kengne Kamga Mobou, Jeroen van Kampen, Jolanda Voermans, Aura Timen, Corine GeurtsvanKessel, Annemiek van der Eijk, Richard Molenkamp, Marion Koopmans, on behalf of the Dutch national COVID-19 response team. |
| EPI_ISL_414550 | hCoV-19/Netherlands/Overijssel_2-2/2020  | Europe / Netherlands / Overijssel 2020-03-06    | Dutch COVID-19 response team | Erasmus Medical Center | David Nieuwenhuijse, Bas Oude Munnink, Reina Sikkema, Claudia Schapendonk, Irina Chestakova, Anne van der Linden, Mark Pronk, Pascal Lexmond, Corien Swaan, Manon Haverkate, Madelief Mollers, Mart Stein, Sandra Kengne Kamga Mobou, Jeroen van Kampen, Jolanda Voermans, Aura Timen, Corine GeurtsvanKessel, Annemiek van der Eijk, Richard Molenkamp, Marion Koopmans, on behalf of the Dutch national COVID-19 response team. |
| EPI_ISL_414551 | hCoV-19/Netherlands/Utrecht_47/2020      | Europe / Netherlands / Utrecht 2020-03-07       | Dutch COVID-19 response team | Erasmus Medical Center | David Nieuwenhuijse, Bas Oude Munnink, Reina Sikkema, Claudia Schapendonk, Irina Chestakova, Anne van der Linden, Mark Pronk, Pascal Lexmond, Corien Swaan, Manon Haverkate, Madelief Mollers, Mart Stein, Sandra Kengne Kamga Mobou, Jeroen van Kampen, Jolanda Voermans, Aura Timen, Corine GeurtsvanKessel, Annemiek van der Eijk, Richard Molenkamp, Marion Koopmans, on behalf of the Dutch national COVID-19 response team. |

|                |                                         |                                     |            |                              |                        |                                                                                                                                                                                                                                                                                                                                                                                                                                   |
|----------------|-----------------------------------------|-------------------------------------|------------|------------------------------|------------------------|-----------------------------------------------------------------------------------------------------------------------------------------------------------------------------------------------------------------------------------------------------------------------------------------------------------------------------------------------------------------------------------------------------------------------------------|
| EPI_ISL_414552 | hCoV-19/Netherlands/Utrecht_46/2020     | Europe / Netherlands / Utrecht      | 2020-03-07 | Dutch COVID-19 response team | Erasmus Medical Center | David Nieuwenhuijse, Bas Oude Munnink, Reina Sikkema, Claudia Schapendonk, Irina Chestakova, Anne van der Linden, Mark Pronk, Pascal Lexmond, Corien Swaan, Manon Haverkate, Madelief Mollers, Mart Stein, Sandra Kengne Kamga Mobou, Jeroen van Kampen, Jolanda Voermans, Aura Timen, Corine GeurtsvanKessel, Annemiek van der Eijk, Richard Molenkamp, Marion Koopmans, on behalf of the Dutch national COVID-19 response team. |
| EPI_ISL_414553 | hCoV-19/Netherlands/Utrecht_14/2020     | Europe / Netherlands / Utrecht      | 2020-03-09 | Dutch COVID-19 response team | Erasmus Medical Center | David Nieuwenhuijse, Bas Oude Munnink, Reina Sikkema, Claudia Schapendonk, Irina Chestakova, Anne van der Linden, Mark Pronk, Pascal Lexmond, Corien Swaan, Manon Haverkate, Madelief Mollers, Mart Stein, Sandra Kengne Kamga Mobou, Jeroen van Kampen, Jolanda Voermans, Aura Timen, Corine GeurtsvanKessel, Annemiek van der Eijk, Richard Molenkamp, Marion Koopmans, on behalf of the Dutch national COVID-19 response team. |
| EPI_ISL_414554 | hCoV-19/Netherlands/Utrecht_15/2020     | Europe / Netherlands / Utrecht      | 2020-03-08 | Dutch COVID-19 response team | Erasmus Medical Center | David Nieuwenhuijse, Bas Oude Munnink, Reina Sikkema, Claudia Schapendonk, Irina Chestakova, Anne van der Linden, Mark Pronk, Pascal Lexmond, Corien Swaan, Manon Haverkate, Madelief Mollers, Mart Stein, Sandra Kengne Kamga Mobou, Jeroen van Kampen, Jolanda Voermans, Aura Timen, Corine GeurtsvanKessel, Annemiek van der Eijk, Richard Molenkamp, Marion Koopmans, on behalf of the Dutch national COVID-19 response team. |
| EPI_ISL_414555 | hCoV-19/Netherlands/Utrecht_16/2020     | Europe / Netherlands / Utrecht      | 2020-03-08 | Dutch COVID-19 response team | Erasmus Medical Center | David Nieuwenhuijse, Bas Oude Munnink, Reina Sikkema, Claudia Schapendonk, Irina Chestakova, Anne van der Linden, Mark Pronk, Pascal Lexmond, Corien Swaan, Manon Haverkate, Madelief Mollers, Mart Stein, Sandra Kengne Kamga Mobou, Jeroen van Kampen, Jolanda Voermans, Aura Timen, Corine GeurtsvanKessel, Annemiek van der Eijk, Richard Molenkamp, Marion Koopmans, on behalf of the Dutch national COVID-19 response team. |
| EPI_ISL_414556 | hCoV-19/Netherlands/ZuidHolland_2/2020  | Europe / Netherlands / Zuid Holland | 2020-03-06 | Dutch COVID-19 response team | Erasmus Medical Center | David Nieuwenhuijse, Bas Oude Munnink, Reina Sikkema, Claudia Schapendonk, Irina Chestakova, Anne van der Linden, Mark Pronk, Pascal Lexmond, Corien Swaan, Manon Haverkate, Madelief Mollers, Mart Stein, Sandra Kengne Kamga Mobou, Jeroen van Kampen, Jolanda Voermans, Aura Timen, Corine GeurtsvanKessel, Annemiek van der Eijk, Richard Molenkamp, Marion Koopmans, on behalf of the Dutch national COVID-19 response team. |
| EPI_ISL_414557 | hCoV-19/Netherlands/ZuidHolland_15/2020 | Europe / Netherlands / Zuid Holland | 2020-03-08 | Dutch COVID-19 response team | Erasmus Medical Center | David Nieuwenhuijse, Bas Oude Munnink, Reina Sikkema, Claudia Schapendonk, Irina Chestakova, Anne van der Linden, Mark Pronk, Pascal Lexmond, Corien Swaan, Manon Haverkate, Madelief Mollers, Mart Stein, Sandra Kengne Kamga Mobou, Jeroen van Kampen, Jolanda Voermans, Aura Timen, Corine GeurtsvanKessel, Annemiek van der Eijk, Richard Molenkamp, Marion Koopmans, on behalf of the Dutch national COVID-19 response team. |
| EPI_ISL_414558 | hCoV-19/Netherlands/ZuidHolland_16/2020 | Europe / Netherlands / Zuid Holland | 2020-03-06 | Dutch COVID-19 response team | Erasmus Medical Center | David Nieuwenhuijse, Bas Oude Munnink, Reina Sikkema, Claudia Schapendonk, Irina Chestakova, Anne van der Linden, Mark Pronk, Pascal Lexmond, Corien Swaan, Manon Haverkate, Madelief Mollers, Mart Stein, Sandra Kengne Kamga Mobou, Jeroen van Kampen, Jolanda Voermans, Aura Timen, Corine GeurtsvanKessel, Annemiek van der Eijk, Richard Molenkamp, Marion Koopmans, on behalf of the Dutch national COVID-19 response team. |
| EPI_ISL_414559 | hCoV-19/Netherlands/ZuidHolland_17/2020 | Europe / Netherlands / Zuid Holland | 2020-03-07 | Dutch COVID-19 response team | Erasmus Medical Center | David Nieuwenhuijse, Bas Oude Munnink, Reina Sikkema, Claudia Schapendonk, Irina Chestakova, Anne van der Linden, Mark Pronk, Pascal Lexmond, Corien Swaan, Manon Haverkate, Madelief Mollers, Mart Stein, Sandra Kengne Kamga Mobou, Jeroen van Kampen, Jolanda Voermans, Aura Timen, Corine GeurtsvanKessel, Annemiek van der Eijk, Richard Molenkamp, Marion Koopmans, on behalf of the Dutch national COVID-19 response team. |
| EPI_ISL_414560 | hCoV-19/Netherlands/ZuidHolland_18/2020 | Europe / Netherlands / Zuid Holland | 2020-03-03 | Dutch COVID-19 response team | Erasmus Medical Center | David Nieuwenhuijse, Bas Oude Munnink, Reina Sikkema, Claudia Schapendonk, Irina Chestakova, Anne van der Linden, Mark Pronk, Pascal Lexmond, Corien Swaan, Manon Haverkate, Madelief Mollers, Mart Stein, Sandra Kengne Kamga Mobou, Jeroen van Kampen, Jolanda Voermans, Aura Timen, Corine GeurtsvanKessel, Annemiek van der Eijk, Richard Molenkamp, Marion Koopmans, on behalf of the Dutch national COVID-19 response team. |
| EPI_ISL_414561 | hCoV-19/Netherlands/ZuidHolland_19/2020 | Europe / Netherlands / Zuid Holland | 2020-03-05 | Dutch COVID-19 response team | Erasmus Medical Center | David Nieuwenhuijse, Bas Oude Munnink, Reina Sikkema, Claudia Schapendonk, Irina Chestakova, Anne van der Linden, Mark Pronk, Pascal Lexmond, Corien Swaan, Manon Haverkate, Madelief Mollers, Mart Stein, Sandra Kengne Kamga Mobou, Jeroen van Kampen, Jolanda Voermans, Aura Timen, Corine GeurtsvanKessel, Annemiek van der Eijk, Richard Molenkamp, Marion Koopmans, on behalf of the Dutch national COVID-19 response team. |

|                |                                         |                                     |            |                                |                                                      |                                                                                                                                                                                                                                                                                                                                                                                                                                                                                                                                                                                                                                                                                                                                                                                                                                                                                                                                                                                                                        |
|----------------|-----------------------------------------|-------------------------------------|------------|--------------------------------|------------------------------------------------------|------------------------------------------------------------------------------------------------------------------------------------------------------------------------------------------------------------------------------------------------------------------------------------------------------------------------------------------------------------------------------------------------------------------------------------------------------------------------------------------------------------------------------------------------------------------------------------------------------------------------------------------------------------------------------------------------------------------------------------------------------------------------------------------------------------------------------------------------------------------------------------------------------------------------------------------------------------------------------------------------------------------------|
| EPI_ISL_414562 | hCoV-19/Netherlands/ZuidHolland_20/2020 | Europe / Netherlands / Zuid Holland | 2020-03-03 | Dutch COVID-19 response team   | Erasmus Medical Center                               | David Nieuwenhuijse, Bas Oude Munnink, Reina Sikkema, Claudia Schapendonk, Irina Chestakova, Anne van der Linden, Mark Pronk, Pascal Lexmond, Corien Swaan, Manon Haverkate, Madelief Mollers, Mart Stein, Sandra Kengne Kamga Mobou, Jeroen van Kampen, Jolanda Voermans, Aura Timen, Corine GeurtsvanKessel, Annemiek van der Eijk, Richard Molenkamp, Marion Koopmans, on behalf of the Dutch national COVID-19 response team.                                                                                                                                                                                                                                                                                                                                                                                                                                                                                                                                                                                      |
| EPI_ISL_414563 | hCoV-19/Netherlands/ZuidHolland_21/2020 | Europe / Netherlands / Zuid Holland | 2020-03-03 | Dutch COVID-19 response team   | Erasmus Medical Center                               | David Nieuwenhuijse, Bas Oude Munnink, Reina Sikkema, Claudia Schapendonk, Irina Chestakova, Anne van der Linden, Mark Pronk, Pascal Lexmond, Corien Swaan, Manon Haverkate, Madelief Mollers, Mart Stein, Sandra Kengne Kamga Mobou, Jeroen van Kampen, Jolanda Voermans, Aura Timen, Corine GeurtsvanKessel, Annemiek van der Eijk, Richard Molenkamp, Marion Koopmans, on behalf of the Dutch national COVID-19 response team.                                                                                                                                                                                                                                                                                                                                                                                                                                                                                                                                                                                      |
| EPI_ISL_414564 | hCoV-19/Netherlands/ZuidHolland_22/2020 | Europe / Netherlands / Zuid Holland | 2020-03-08 | Dutch COVID-19 response team   | Erasmus Medical Center                               | David Nieuwenhuijse, Bas Oude Munnink, Reina Sikkema, Claudia Schapendonk, Irina Chestakova, Anne van der Linden, Mark Pronk, Pascal Lexmond, Corien Swaan, Manon Haverkate, Madelief Mollers, Mart Stein, Sandra Kengne Kamga Mobou, Jeroen van Kampen, Jolanda Voermans, Aura Timen, Corine GeurtsvanKessel, Annemiek van der Eijk, Richard Molenkamp, Marion Koopmans, on behalf of the Dutch national COVID-19 response team.                                                                                                                                                                                                                                                                                                                                                                                                                                                                                                                                                                                      |
| EPI_ISL_414565 | hCoV-19/Netherlands/ZuidHolland_23/2020 | Europe / Netherlands / Zuid Holland | 2020-03-09 | Dutch COVID-19 response team   | Erasmus Medical Center                               | David Nieuwenhuijse, Bas Oude Munnink, Reina Sikkema, Claudia Schapendonk, Irina Chestakova, Anne van der Linden, Mark Pronk, Pascal Lexmond, Corien Swaan, Manon Haverkate, Madelief Mollers, Mart Stein, Sandra Kengne Kamga Mobou, Jeroen van Kampen, Jolanda Voermans, Aura Timen, Corine GeurtsvanKessel, Annemiek van der Eijk, Richard Molenkamp, Marion Koopmans, on behalf of the Dutch national COVID-19 response team.                                                                                                                                                                                                                                                                                                                                                                                                                                                                                                                                                                                      |
| EPI_ISL_414566 | hCoV-19/Netherlands/ZuidHolland_24/2020 | Europe / Netherlands / Zuid Holland | 2020-03-06 | Dutch COVID-19 response team   | Erasmus Medical Center                               | David Nieuwenhuijse, Bas Oude Munnink, Reina Sikkema, Claudia Schapendonk, Irina Chestakova, Anne van der Linden, Mark Pronk, Pascal Lexmond, Corien Swaan, Manon Haverkate, Madelief Mollers, Mart Stein, Sandra Kengne Kamga Mobou, Jeroen van Kampen, Jolanda Voermans, Aura Timen, Corine GeurtsvanKessel, Annemiek van der Eijk, Richard Molenkamp, Marion Koopmans, on behalf of the Dutch national COVID-19 response team.                                                                                                                                                                                                                                                                                                                                                                                                                                                                                                                                                                                      |
| EPI_ISL_414567 | hCoV-19/Hong Kong/VM20002508/2020       | Asia / Hong Kong                    | 2020-02-10 | Hong Kong Department of Health | School of Public Health, The University of Hong Kong | Dominic N.C. Tsang, Daniel K.W. Chu, Leo L.M. Poon, Malik Peiris Arash Arashkia, Kayhan Azadmanesh, Mohammad Hassan Pouriayevali, Tahmineh Jalali, Zahra Ahmadi, Mohammad Sadegh Shams Nosrati, Ali Maleki, Zabihollah Shoja, Sanam Azad-Mazjiri, Neda Amin, Mehdi Rohani, Saber Esmaeili, Ahmad Ghasemi, Amir Hesam Nemati, Ahmad Mahmoudi, Zahra Fereydouni, Mahsa Tavakolirad, Tahereh Mohammadi, Sahar Khakifirooz, Mehdi Fazlalipour, Maryam Rostamtabar, Arezoo Parikhani, Hesam Karimi, Kazem Baesi, Seyed Dawood Mousavi Nasab, Mahmood Barati, Mohammad Reza Asadi Karam, Mehri Habibi, Fatemeh Fotouhi-Chahooki, Neda Afzali, Ali Torabi, Azita Eshratkha mohammadnejad, Seyedeh Sahar Bathaeian, Mina Bahri, Mohamad Mahdi Mortazavipour, Seyedeh Atefe Hosseini, Farideh Niknam, Parastoo Yekta Sanati, Hadiseh Shokouhi, Azam Amirian, Afsaneh zokaei, Hajarossadat Ghaderi, Mahboobeh Rafigh, Elmira Vadaye kheiri, Akram Agharezaei, Akram Abouie Mehrizi, seyedeh Zahra Moravej, Mostafa Salehi-Vaziri |
| EPI_ISL_414568 | hCoV-19/Iran/113-2/2020                 | Asia / Iran / Qom                   | 2020-02-19 | Pasteur Institute of Iran      | Pasteur Institute of Iran                            | Dominic N.C. Tsang, Daniel K.W. Chu, Leo L.M. Poon, Malik Peiris Arash Arashkia, Kayhan Azadmanesh, Mohammad Hassan Pouriayevali, Tahmineh Jalali, Zahra Ahmadi, Mohammad Sadegh Shams Nosrati, Ali Maleki, Zabihollah Shoja, Sanam Azad-Mazjiri, Neda Amin, Mehdi Rohani, Saber Esmaeili, Ahmad Ghasemi, Amir Hesam Nemati, Ahmad Mahmoudi, Zahra Fereydouni, Mahsa Tavakolirad, Tahereh Mohammadi, Sahar Khakifirooz, Mehdi Fazlalipour, Maryam Rostamtabar, Arezoo Parikhani, Hesam Karimi, Kazem Baesi, Seyed Dawood Mousavi Nasab, Mahmood Barati, Mohammad Reza Asadi Karam, Mehri Habibi, Fatemeh Fotouhi-Chahooki, Neda Afzali, Ali Torabi, Azita Eshratkha mohammadnejad, Seyedeh Sahar Bathaeian, Mina Bahri, Mohamad Mahdi Mortazavipour, Seyedeh Atefe Hosseini, Farideh Niknam, Parastoo Yekta Sanati, Hadiseh Shokouhi, Azam Amirian, Afsaneh zokaei, Hajarossadat Ghaderi, Mahboobeh Rafigh, Elmira Vadaye kheiri, Akram Agharezaei, Akram Abouie Mehrizi, seyedeh Zahra Moravej, Mostafa Salehi-Vaziri |
| EPI_ISL_414569 | hCoV-19/Hong Kong/VM20002582/2020       | Asia / Hong Kong                    | 2020-02-12 | Hong Kong Department of Health | School of Public Health, The University of Hong Kong | Dominic N.C. Tsang, Daniel K.W. Chu, Leo L.M. Poon, Malik Peiris Arash Arashkia, Kayhan Azadmanesh, Mohammad Hassan Pouriayevali, Tahmineh Jalali, Zahra Ahmadi, Mohammad Sadegh Shams Nosrati, Ali Maleki, Zabihollah Shoja, Sanam Azad-Mazjiri, Neda Amin, Mehdi Rohani, Saber Esmaeili, Ahmad Ghasemi, Amir Hesam Nemati, Ahmad Mahmoudi, Zahra Fereydouni, Mahsa Tavakolirad, Tahereh Mohammadi, Sahar Khakifirooz, Mehdi Fazlalipour, Maryam Rostamtabar, Arezoo Parikhani, Hesam Karimi, Kazem Baesi, Seyed Dawood Mousavi Nasab, Mahmood Barati, Mohammad Reza Asadi Karam, Mehri Habibi, Fatemeh Fotouhi-Chahooki, Neda Afzali, Ali Torabi, Azita Eshratkha mohammadnejad, Seyedeh Sahar Bathaeian, Mina Bahri, Mohamad Mahdi Mortazavipour, Seyedeh Atefe Hosseini, Farideh Niknam, Parastoo Yekta Sanati, Hadiseh Shokouhi, Azam Amirian, Afsaneh zokaei, Hajarossadat Ghaderi, Mahboobeh Rafigh, Elmira Vadaye kheiri, Akram Agharezaei, Akram Abouie Mehrizi, seyedeh Zahra Moravej, Mostafa Salehi-Vaziri |
| EPI_ISL_414571 | hCoV-19/Hong Kong/VM20002849/2020       | Asia / Hong Kong                    | 2020-02-22 | Hong Kong Department of Health | School of Public Health, The University of Hong Kong | Dominic N.C. Tsang, Daniel K.W. Chu, Leo L.M. Poon, Malik Peiris Arash Arashkia, Kayhan Azadmanesh, Mohammad Hassan Pouriayevali, Tahmineh Jalali, Zahra Ahmadi, Mohammad Sadegh Shams Nosrati, Ali Maleki, Zabihollah Shoja, Sanam Azad-Mazjiri, Neda Amin, Mehdi Rohani, Saber Esmaeili, Ahmad Ghasemi, Amir Hesam Nemati, Ahmad Mahmoudi, Zahra Fereydouni, Mahsa Tavakolirad, Tahereh Mohammadi, Sahar Khakifirooz, Mehdi Fazlalipour, Maryam Rostamtabar, Arezoo Parikhani, Hesam Karimi, Kazem Baesi, Seyed Dawood Mousavi Nasab, Mahmood Barati, Mohammad Reza Asadi Karam, Mehri Habibi, Fatemeh Fotouhi-Chahooki, Neda Afzali, Ali Torabi, Azita Eshratkha mohammadnejad, Seyedeh Sahar Bathaeian, Mina Bahri, Mohamad Mahdi Mortazavipour, Seyedeh Atefe Hosseini, Farideh Niknam, Parastoo Yekta Sanati, Hadiseh Shokouhi, Azam Amirian, Afsaneh zokaei, Hajarossadat Ghaderi, Mahboobeh Rafigh, Elmira Vadaye kheiri, Akram Agharezaei, Akram Abouie Mehrizi, seyedeh Zahra Moravej, Mostafa Salehi-Vaziri |
| EPI_ISL_414572 | hCoV-19/Iran/133-2/2020                 | Asia / Iran / Tehran / Nazi Abad    | 2020-02-20 | Pasteur Institute of Iran      | Pasteur Institute of Iran                            | Dominic N.C. Tsang, Daniel K.W. Chu, Leo L.M. Poon, Malik Peiris Arash Arashkia, Kayhan Azadmanesh, Mohammad Hassan Pouriayevali, Tahmineh Jalali, Zahra Ahmadi, Mohammad Sadegh Shams Nosrati, Ali Maleki, Zabihollah Shoja, Sanam Azad-Mazjiri, Neda Amin, Mehdi Rohani, Saber Esmaeili, Ahmad Ghasemi, Amir Hesam Nemati, Ahmad Mahmoudi, Zahra Fereydouni, Mahsa Tavakolirad, Tahereh Mohammadi, Sahar Khakifirooz, Mehdi Fazlalipour, Maryam Rostamtabar, Arezoo Parikhani, Hesam Karimi, Kazem Baesi, Seyed Dawood Mousavi Nasab, Mahmood Barati, Mohammad Reza Asadi Karam, Mehri Habibi, Fatemeh Fotouhi-Chahooki, Neda Afzali, Ali Torabi, Azita Eshratkha mohammadnejad, Seyedeh Sahar Bathaeian, Mina Bahri, Mohamad Mahdi Mortazavipour, Seyedeh Atefe Hosseini, Farideh Niknam, Parastoo Yekta Sanati, Hadiseh Shokouhi, Azam Amirian, Afsaneh zokaei, Hajarossadat Ghaderi, Mahboobeh Rafigh, Elmira Vadaye kheiri, Akram Agharezaei, Akram Abouie Mehrizi, seyedeh Zahra Moravej, Mostafa Salehi-Vaziri |

|                |                                     |                                    |            |                                                                                           |                                                                                           |                                                                                                                                                                                                                                                                                                                                                                                                                                                                                                                                                                                                                                                                                                                                                                                                                                                                                                                                                       |
|----------------|-------------------------------------|------------------------------------|------------|-------------------------------------------------------------------------------------------|-------------------------------------------------------------------------------------------|-------------------------------------------------------------------------------------------------------------------------------------------------------------------------------------------------------------------------------------------------------------------------------------------------------------------------------------------------------------------------------------------------------------------------------------------------------------------------------------------------------------------------------------------------------------------------------------------------------------------------------------------------------------------------------------------------------------------------------------------------------------------------------------------------------------------------------------------------------------------------------------------------------------------------------------------------------|
| EPI_ISL_414573 | hCoV-19/Iran/137-2/2020             | Asia / Iran / Tehran               | 2020-02-20 | Pasteur Institute of Iran                                                                 | Pasteur Institute of Iran                                                                 | Arash Arashkia, Kayhan Azadmanesh, Mohammad Hassan Pouriayevali, Tahmineh Jalali, Zahra Ahmadi, Mohammad Sadegh Shams Nosrati, Ali Maleki, Zabihollah Shoja, Sanam Azad-Mazjiri, Neda Amin, Mehdi Rohani, Saber Esmaeili, Ahmad Ghasemi, Amir Hesam Nemati, Ahmad Mahmoudi, Zahra Fereydouni, Mahsa Tavakolirad, Tahereh Mohammadi, Sahar Khakifirooz, Mehdi Fazlalipour, Maryam Rostamtabar, Arezoo Parikhani, Hesam Karimi, Kazem Baesi, Seyed Dawood Mousavi Nasab, Mahmood Barati, Mohammad Reza Asadi Karam, Mehri Habibi, Fatemeh Fotouhi-Chahooki, Neda Afzali, Ali Torabi, Azita Eshratkhaheh mohammadnejad, Seyede Zahra Bathaeian, Mina Bahri, Mohamad Mahdi Mortazavipour, Seyede Atefeh Hosseini, Farideh Niknam, Parastoo Yekta Sanati, Hadiseh Shokouhi, Azam Amirian, Afsaneh zokaei, Hajarosadat Ghaderi, Mahboobeh Rafiqh, Elmira Vadaye kheiri, Akram Agharezaei, Akram Abouie Mehrizi, seyede Zahra Moravej, Mostafa Salehi-Vaziri |
| EPI_ISL_414574 | hCoV-19/Germany/NRW-10/2020         | Europe / Germany / North Rhine Wes | 2020-02-28 | Center of Medical Microbiology, Virology, and Hospital Hygiene, University of Duesseldorf | Center of Medical Microbiology, Virology, and Hospital Hygiene, University of Duesseldorf | Ortwin Adams, Marcel Andree, Alexander Dilthey, Torsten Feldt, Sandra Hauka, Torsten Houwaart, Björn-Erik Jensen, Detlef Kindgen-Milles, Malte Kohns Vasconcelos, Klaus Pfeffer, Tina Senff, Daniel Strelow, Jörg Timm, Andreas Walker, Tobias Wiemann                                                                                                                                                                                                                                                                                                                                                                                                                                                                                                                                                                                                                                                                                                |
| EPI_ISL_414575 | hCoV-19/Iran/113-1/2020             | Asia / Iran / Qom                  | 2020-02-19 | Pasteur Institute of Iran                                                                 | Pasteur Institute of Iran                                                                 | Arash Arashkia, Kayhan Azadmanesh, Mohammad Hassan Pouriayevali, Tahmineh Jalali, Zahra Ahmadi, Mohammad Sadegh Shams Nosrati, Ali Maleki, Zabihollah Shoja, Sanam Azad-Mazjiri, Neda Amin, Mehdi Rohani, Saber Esmaeili, Ahmad Ghasemi, Amir Hesam Nemati, Ahmad Mahmoudi, Zahra Fereydouni, Mahsa Tavakolirad, Tahereh Mohammadi, Sahar Khakifirooz, Mehdi Fazlalipour, Maryam Rostamtabar, Arezoo Parikhani, Hesam Karimi, Kazem Baesi, Seyed Dawood Mousavi Nasab, Mahmood Barati, Mohammad Reza Asadi Karam, Mehri Habibi, Fatemeh Fotouhi-Chahooki, Neda Afzali, Ali Torabi, Azita Eshratkhaheh mohammadnejad, Seyede Zahra Bathaeian, Mina Bahri, Mohamad Mahdi Mortazavipour, Seyede Atefeh Hosseini, Farideh Niknam, Parastoo Yekta Sanati, Hadiseh Shokouhi, Azam Amirian, Afsaneh zokaei, Hajarosadat Ghaderi, Mahboobeh Rafiqh, Elmira Vadaye kheiri, Mina Agharezaei, Akram Abouie Mehrizi, seyede Zahra Moravej, Mostafa Salehi-Vaziri  |
| EPI_ISL_414577 | hCoV-19/Chile/Talca-1/2020          | South America / Chile / Talca      | 2020-03-02 | Hospital de Talca, Chile                                                                  | Instituto de Salud Publica de Chile                                                       | Andrés E. Castillo, Bárbara Parra, Paz Tapia, Alejandra Acevedo, Jaime Lagos, Winston Andrade, Loredana Arata, Gabriel Leal, Gisselle Barra, Carolina Tambley, Javier Tognarelli, Patricia Bustos, Soledad Ulloa, Rodrigo Fasce, Jorge Fernández                                                                                                                                                                                                                                                                                                                                                                                                                                                                                                                                                                                                                                                                                                      |
| EPI_ISL_414578 | hCoV-19/Chile/Talca-2/2020          | South America / Chile / Talca      | 2020-03-04 | Hospital de Talca, Chile                                                                  | Instituto de Salud Publica de Chile                                                       | Andrés E. Castillo, Bárbara Parra, Paz Tapia, Alejandra Acevedo, Jaime Lagos, Winston Andrade, Loredana Arata, Gabriel Leal, Gisselle Barra, Carolina Tambley, Javier Tognarelli, Patricia Bustos, Soledad Ulloa, Rodrigo Fasce, Jorge Fernández                                                                                                                                                                                                                                                                                                                                                                                                                                                                                                                                                                                                                                                                                                      |
| EPI_ISL_414579 | hCoV-19/Chile/Santiago-1/2020       | South America / Chile / Santiago   | 2020-03-03 | Clinica Alemana de Santiago, Chile                                                        | Instituto de Salud Publica de Chile                                                       | Andrés E. Castillo, Bárbara Parra, Paz Tapia, Alejandra Acevedo, Jaime Lagos, Winston Andrade, Loredana Arata, Gabriel Leal, Gisselle Barra, Carolina Tambley, Javier Tognarelli, Patricia Bustos, Soledad Ulloa, Rodrigo Fasce, Jorge Fernández                                                                                                                                                                                                                                                                                                                                                                                                                                                                                                                                                                                                                                                                                                      |
| EPI_ISL_414580 | hCoV-19/Chile/Santiago-2/2020       | South America / Chile / Santiago   | 2020-03-05 | Clinica Santa Maria, Santiago, Chile                                                      | Instituto de Salud Publica de Chile                                                       | Andrés E. Castillo, Bárbara Parra, Paz Tapia, Alejandra Acevedo, Jaime Lagos, Winston Andrade, Loredana Arata, Gabriel Leal, Gisselle Barra, Carolina Tambley, Javier Tognarelli, Patricia Bustos, Soledad Ulloa, Rodrigo Fasce, Jorge Fernández                                                                                                                                                                                                                                                                                                                                                                                                                                                                                                                                                                                                                                                                                                      |
| EPI_ISL_414584 | hCoV-19/Ireland/Dublin-19072/2020   | Europe / Ireland / Dublin          | 2020-03-02 | UCD National Virus Reference Laboratory                                                   | UCD National Virus Reference Laboratory                                                   | Michael Carr, Gabriel Gonzalez, Jonathan Dean, Suzie Coughlan, Alison Murphy, Kevin Byrne, Ken Wolfe, Jeff Connell, Brendan Loftus, Cillian F De Gascun                                                                                                                                                                                                                                                                                                                                                                                                                                                                                                                                                                                                                                                                                                                                                                                               |
| EPI_ISL_414585 | hCoV-19/Ireland/Limerick-19933/2020 | Europe / Ireland / Limerick        | 2020-03-03 | UCD National Virus Reference Laboratory                                                   | UCD National Virus Reference Laboratory                                                   | Michael Carr, Gabriel Gonzalez, Jonathan Dean, Suzie Coughlan, Alison Murphy, Kevin Byrne, Ken Wolfe, Jeff Connell, Brendan Loftus, Cillian F De Gascun                                                                                                                                                                                                                                                                                                                                                                                                                                                                                                                                                                                                                                                                                                                                                                                               |
| EPI_ISL_414586 | hCoV-19/Ireland/Limerick-19934/2020 | Europe / Ireland / Limerick        | 2020-03-03 | UCD National Virus Reference Laboratory                                                   | UCD National Virus Reference Laboratory                                                   | Michael Carr, Gabriel Gonzalez, Jonathan Dean, Suzie Coughlan, Alison Murphy, Kevin Byrne, Ken Wolfe, Jeff Connell, Brendan Loftus, Cillian F De Gascun                                                                                                                                                                                                                                                                                                                                                                                                                                                                                                                                                                                                                                                                                                                                                                                               |
| EPI_ISL_414587 | hCoV-19/Ireland/Limerick-19935/2020 | Europe / Ireland / Limerick        | 2020-03-03 | UCD National Virus Reference Laboratory                                                   | UCD National Virus Reference Laboratory                                                   | Michael Carr, Gabriel Gonzalez, Jonathan Dean, Suzie Coughlan, Alison Murphy, Kevin Byrne, Ken Wolfe, Jeff Connell, Brendan Loftus, Cillian F De Gascun                                                                                                                                                                                                                                                                                                                                                                                                                                                                                                                                                                                                                                                                                                                                                                                               |
| EPI_ISL_414588 | hCoV-19/USA/MN1-MDH1/2020           | North America / USA / Minnesota    | 2020-03-05 | Minnesota Department of Health, Public Health Laboratory                                  | Minnesota Department of Health, Public Health Laboratory                                  | Matt Plumb, Jake Garfin and Xiong Wang                                                                                                                                                                                                                                                                                                                                                                                                                                                                                                                                                                                                                                                                                                                                                                                                                                                                                                                |
| EPI_ISL_414589 | hCoV-19/USA/MN2-MDH2/2020           | North America / USA / Minnesota    | 2020-03-07 | Minnesota Department of Health, Public Health Laboratory                                  | Minnesota Department of Health, Public Health Laboratory                                  | Matt Plumb, Jake Garfin and Xiong Wang                                                                                                                                                                                                                                                                                                                                                                                                                                                                                                                                                                                                                                                                                                                                                                                                                                                                                                                |
| EPI_ISL_414590 | hCoV-19/USA/MN3-MDH3/2020           | North America / USA / Minnesota    | 2020-03-09 | Minnesota Department of Health, Public Health Laboratory                                  | Minnesota Department of Health, Public Health Laboratory                                  | Matt Plumb, Jake Garfin and Xiong Wang                                                                                                                                                                                                                                                                                                                                                                                                                                                                                                                                                                                                                                                                                                                                                                                                                                                                                                                |
| EPI_ISL_414591 | hCoV-19/USA/WA-UW22/2020            | North America / USA / Washington   | 2020-03-06 | UW Virology Lab                                                                           | UW Virology Lab                                                                           | Pavitra Roychoudhury, Hong Xie, Keith Jerome, Alexander Greninger                                                                                                                                                                                                                                                                                                                                                                                                                                                                                                                                                                                                                                                                                                                                                                                                                                                                                     |
| EPI_ISL_414592 | hCoV-19/USA/WA-UW23/2020            | North America / USA / Washington   | 2020-03-06 | UW Virology Lab                                                                           | UW Virology Lab                                                                           | Pavitra Roychoudhury, Hong Xie, Keith Jerome, Alexander Greninger                                                                                                                                                                                                                                                                                                                                                                                                                                                                                                                                                                                                                                                                                                                                                                                                                                                                                     |
| EPI_ISL_414593 | hCoV-19/USA/WA-UW24/2020            | North America / USA / Washington   | 2020-03-05 | UW Virology Lab                                                                           | UW Virology Lab                                                                           | Pavitra Roychoudhury, Hong Xie, Keith Jerome, Alexander Greninger                                                                                                                                                                                                                                                                                                                                                                                                                                                                                                                                                                                                                                                                                                                                                                                                                                                                                     |
| EPI_ISL_414594 | hCoV-19/USA/WA-UW25/2020            | North America / USA / Washington   | 2020-03-05 | UW Virology Lab                                                                           | UW Virology Lab                                                                           | Pavitra Roychoudhury, Hong Xie, Keith Jerome, Alexander Greninger                                                                                                                                                                                                                                                                                                                                                                                                                                                                                                                                                                                                                                                                                                                                                                                                                                                                                     |
| EPI_ISL_414595 | hCoV-19/USA/WA-UW26/2020            | North America / USA / Washington   | 2020-03-05 | UW Virology Lab                                                                           | UW Virology Lab                                                                           | Pavitra Roychoudhury, Hong Xie, Keith Jerome, Alexander Greninger                                                                                                                                                                                                                                                                                                                                                                                                                                                                                                                                                                                                                                                                                                                                                                                                                                                                                     |
| EPI_ISL_414596 | hCoV-19/USA/WA-UW27/2020            | North America / USA / Washington   | 2020-03-04 | UW Virology Lab                                                                           | UW Virology Lab                                                                           | Pavitra Roychoudhury, Hong Xie, Keith Jerome, Alexander Greninger                                                                                                                                                                                                                                                                                                                                                                                                                                                                                                                                                                                                                                                                                                                                                                                                                                                                                     |



|                |                                   |                                        |            |                                                                                                                |                                                                                                         |                                                                                                                                                                                                                                                                     |
|----------------|-----------------------------------|----------------------------------------|------------|----------------------------------------------------------------------------------------------------------------|---------------------------------------------------------------------------------------------------------|---------------------------------------------------------------------------------------------------------------------------------------------------------------------------------------------------------------------------------------------------------------------|
| EPI_ISL_414597 | hCoV-19/USA/WA-UW28/2020          | North America / USA / Washington / I   | 2020-03-04 | UW Virology Lab                                                                                                | UW Virology Lab                                                                                         | Pavitra Roychoudhury, Hong Xie, Keith Jerome, Alexander Greninger                                                                                                                                                                                                   |
| EPI_ISL_414598 | hCoV-19/Spain/Valencia3/2020      | Europe / Spain / Comunitat Valencian   | 2020-03-05 | Servicio Microbiologia, Hospital Clinico Universitario, Valencia                                               | Sequencing and Bioinformatics Service and Molecular Epidemiology Research Group. FISABIO-Public Health. | David Navarro, Maria Alma Bracho, Giuseppe D'Auria, Griselda De Marco, Neris Garcia-Gonzalez, Fernando Gonzalez-Candelas                                                                                                                                            |
| EPI_ISL_414599 | hCoV-19/Italy/MBS-Cagliari-1/2020 | Europe / Italy / Cagliari              | 2020-03    | unknown                                                                                                        | Department of Surgical Sciences                                                                         | Scano A., Fais, S., Loddo, M., Palmieri, G., Scioscia, R., DelRio, N.M.C., Coghe, F. and Orru, G.                                                                                                                                                                   |
| EPI_ISL_414600 | hCoV-19/France/GE1583/2020        | Europe / France / Grand-Est / Strasbr  | 2020-02-26 | Laboratoire de Virologie Institut de Virologie - INSERM U 1109 Hôpitaux Universitaires de Strasbourg           | National Reference Center for Viruses of Respiratory Infections, Institut Pasteur, Paris                | Méline Albert, Marion Barbet, Sylvie Behillil, Méline Bizard, Angela Brisebarre, Flora Donati Vincent Enouf, Maud Vanpeene, Sylvie van der Werf, Samira Fafi-Kremer                                                                                                 |
| EPI_ISL_414616 | hCoV-19/USA/WA-UW29/2020          | North America / USA / Washington / I   | 2020-03-08 | UW Virology Lab                                                                                                | UW Virology Lab                                                                                         | Pavitra Roychoudhury, Hong Xie, Keith Jerome, Alexander Greninger                                                                                                                                                                                                   |
| EPI_ISL_414617 | hCoV-19/USA/WA-UW30/2020          | North America / USA                    | 2020-03-08 | UW Virology Lab                                                                                                | UW Virology Lab                                                                                         | Pavitra Roychoudhury, Hong Xie, Keith Jerome, Alexander Greninger                                                                                                                                                                                                   |
| EPI_ISL_414618 | hCoV-19/USA/WA-UW31/2020          | North America / USA                    | 2020-03-08 | UW Virology Lab                                                                                                | UW Virology Lab                                                                                         | Pavitra Roychoudhury, Hong Xie, Keith Jerome, Alexander Greninger                                                                                                                                                                                                   |
| EPI_ISL_414619 | hCoV-19/USA/WA-UW32/2020          | North America / USA                    | 2020-03-07 | UW Virology Lab                                                                                                | UW Virology Lab                                                                                         | Pavitra Roychoudhury, Hong Xie, Keith Jerome, Alexander Greninger                                                                                                                                                                                                   |
| EPI_ISL_414620 | hCoV-19/USA/WA-UW33/2020          | North America / USA                    | 2020-03-08 | UW Virology Lab                                                                                                | UW Virology Lab                                                                                         | Pavitra Roychoudhury, Hong Xie, Keith Jerome, Alexander Greninger                                                                                                                                                                                                   |
| EPI_ISL_414621 | hCoV-19/USA/WA-UW34/2020          | North America / USA / Washington       | 2020-03-07 | UW Virology Lab                                                                                                | UW Virology Lab                                                                                         | Pavitra Roychoudhury, Hong Xie, Keith Jerome, Alexander Greninger                                                                                                                                                                                                   |
| EPI_ISL_414622 | hCoV-19/USA/WA-UW35/2020          | North America / USA / Washington /     | 2020-03-08 | UW Virology Lab                                                                                                | UW Virology Lab                                                                                         | Pavitra Roychoudhury, Hong Xie, Keith Jerome, Alexander Greninger                                                                                                                                                                                                   |
| EPI_ISL_414623 | hCoV-19/France/GE1583/2020        | Europe / France / Grand-Est / Strasbr  | 2020-02-25 | Laboratoire de Virologie Institut de Virologie - INSERM U 1109 Hôpitaux Universitaires de Strasbourg           | National Reference Center for Viruses of Respiratory Infections, Institut Pasteur, Paris                | Méline Albert, Marion Barbet, Sylvie Behillil, Méline Bizard, Angela Brisebarre, Flora Donati Vincent Enouf, Maud Vanpeene, Sylvie van der Werf, Samira Fafi-Kremer                                                                                                 |
| EPI_ISL_414624 | hCoV-19/France/N1620/2020         | Europe / France / Normandie / Rouen    | 2020-02-26 | Centre Hospitalier Universitaire de Rouen Laboratoire de Virologie                                             | National Reference Center for Viruses of Respiratory Infections, Institut Pasteur, Paris                | Méline Albert, Marion Barbet, Sylvie Behillil, Méline Bizard, Angela Brisebarre, Flora Donati Vincent Enouf, Maud Vanpeene, Sylvie van der Werf, Jean-Christophe Plantier                                                                                           |
| EPI_ISL_414625 | hCoV-19/France/PL1643/2020        | Europe / France / Pays de la Loire / N | 2020-02-26 | Centre Hospitalier Régional Universitaire de Nantes Laboratoire de Virologie                                   | National Reference Center for Viruses of Respiratory Infections, Institut Pasteur, Paris                | Méline Albert, Marion Barbet, Sylvie Behillil, Méline Bizard, Angela Brisebarre, Flora Donati Vincent Enouf, Maud Vanpeene, Sylvie van der Werf, Marianne Coste-Burel                                                                                               |
| EPI_ISL_414626 | hCoV-19/France/HF1684/2020        | Europe / France / Hauts de France / C  | 2020-02-29 | unknown                                                                                                        | National Reference Center for Viruses of Respiratory Infections, Institut Pasteur, Paris                | Méline Albert, Marion Barbet, Sylvie Behillil, Méline Bizard, Angela Brisebarre, Flora Donati Vincent Enouf, Maud Vanpeene, Sylvie van der Werf                                                                                                                     |
| EPI_ISL_414627 | hCoV-19/France/HF1795/2020        | Europe / France / Hauts de France / C  | 2020-03-02 | Centre Hospitalier Compiègne Laboratoire de Biologie                                                           | National Reference Center for Viruses of Respiratory Infections, Institut Pasteur, Paris                | Méline Albert, Marion Barbet, Sylvie Behillil, Méline Bizard, Angela Brisebarre, Flora Donati Vincent Enouf, Maud Vanpeene, Sylvie van der Werf, Raulin Olivia                                                                                                      |
| EPI_ISL_414628 | hCoV-19/France/HF1805/2020        | Europe / France / Hauts de France / C  | 2020-03-02 | Centre Hospitalier Compiègne Laboratoire de Biologie                                                           | National Reference Center for Viruses of Respiratory Infections, Institut Pasteur, Paris                | Méline Albert, Marion Barbet, Sylvie Behillil, Méline Bizard, Angela Brisebarre, Flora Donati Vincent Enouf, Maud Vanpeene, Sylvie van der Werf, Raulin Olivia                                                                                                      |
| EPI_ISL_414629 | hCoV-19/France/HF1870/2020        | Europe / France / Hauts de France / C  | 2020-03-03 | Centre Hospitalier Compiègne Laboratoire de Biologie                                                           | National Reference Center for Viruses of Respiratory Infections, Institut Pasteur, Paris                | Méline Albert, Marion Barbet, Sylvie Behillil, Méline Bizard, Angela Brisebarre, Flora Donati Vincent Enouf, Maud Vanpeene, Sylvie van der Werf, Raulin Olivia                                                                                                      |
| EPI_ISL_414630 | hCoV-19/France/HF1871/2020        | Europe / France / Hauts de France / C  | 2020-03-03 | Centre Hospitalier Compiègne Laboratoire de Biologie                                                           | National Reference Center for Viruses of Respiratory Infections, Institut Pasteur, Paris                | Méline Albert, Marion Barbet, Sylvie Behillil, Méline Bizard, Angela Brisebarre, Flora Donati Vincent Enouf, Maud Vanpeene, Sylvie van der Werf, Raulin Olivia                                                                                                      |
| EPI_ISL_414631 | hCoV-19/France/GE1973/2020        | Europe / France / Grand-Est / Reims    | 2020-03-04 | Hôpital Robert Debré Laboratoire de Virologie                                                                  | National Reference Center for Viruses of Respiratory Infections, Institut Pasteur, Paris                | Méline Albert, Marion Barbet, Sylvie Behillil, Méline Bizard, Angela Brisebarre, Flora Donati Vincent Enouf, Maud Vanpeene, Sylvie van der Werf, Laurent Andreoletti                                                                                                |
| EPI_ISL_414632 | hCoV-19/France/GE1977/2020        | Europe / France / Grand-Est / Reims    | 2020-03-04 | Hôpital Robert Debré Laboratoire de Virologie                                                                  | National Reference Center for Viruses of Respiratory Infections, Institut Pasteur, Paris                | Méline Albert, Marion Barbet, Sylvie Behillil, Méline Bizard, Angela Brisebarre, Flora Donati Vincent Enouf, Maud Vanpeene, Sylvie van der Werf, Laurent Andreoletti                                                                                                |
| EPI_ISL_414633 | hCoV-19/France/IDF1980/2020       | Europe / France / Ile-de-France / Pon  | 2020-03-04 | Centre Hospitalier René Dubois Laboratoire de Microbiologie - Bât A                                            | National Reference Center for Viruses of Respiratory Infections, Institut Pasteur, Paris                | Méline Albert, Marion Barbet, Sylvie Behillil, Méline Bizard, Angela Brisebarre, Flora Donati Vincent Enouf, Maud Vanpeene, Sylvie van der Werf, Pascale Martres                                                                                                    |
| EPI_ISL_414634 | hCoV-19/France/HF1986/2020        | Europe / France / Hauts de France / C  | 2020-03-04 | Centre Hospitalier Compiègne Laboratoire de Biologie                                                           | National Reference Center for Viruses of Respiratory Infections, Institut Pasteur, Paris                | Méline Albert, Marion Barbet, Sylvie Behillil, Méline Bizard, Angela Brisebarre, Flora Donati Vincent Enouf, Maud Vanpeene, Sylvie van der Werf, Raulin Olivia                                                                                                      |
| EPI_ISL_414635 | hCoV-19/France/HF1988/2020        | Europe / France / Hauts de France / C  | 2020-03-04 | Centre Hospitalier Compiègne Laboratoire de Biologie                                                           | National Reference Center for Viruses of Respiratory Infections, Institut Pasteur, Paris                | Méline Albert, Marion Barbet, Sylvie Behillil, Méline Bizard, Angela Brisebarre, Flora Donati Vincent Enouf, Maud Vanpeene, Sylvie van der Werf, Raulin Olivia                                                                                                      |
| EPI_ISL_414636 | hCoV-19/France/HF1989/2020        | Europe / France / Hauts de France / C  | 2020-03-04 | Centre Hospitalier Compiègne Laboratoire de Biologie                                                           | National Reference Center for Viruses of Respiratory Infections, Institut Pasteur, Paris                | Méline Albert, Marion Barbet, Sylvie Behillil, Méline Bizard, Angela Brisebarre, Flora Donati Vincent Enouf, Maud Vanpeene, Sylvie van der Werf, Raulin Olivia                                                                                                      |
| EPI_ISL_414637 | hCoV-19/France/HF1993/2020        | Europe / France / Hauts de France / C  | 2020-03-04 | Centre Hospitalier Compiègne Laboratoire de Biologie                                                           | National Reference Center for Viruses of Respiratory Infections, Institut Pasteur, Paris                | Méline Albert, Marion Barbet, Sylvie Behillil, Méline Bizard, Angela Brisebarre, Flora Donati Vincent Enouf, Maud Vanpeene, Sylvie van der Werf, Raulin Olivia                                                                                                      |
| EPI_ISL_414638 | hCoV-19/France/HF1995/2020        | Europe / France / Hauts de France / C  | 2020-03-04 | Centre Hospitalier Compiègne Laboratoire de Biologie                                                           | National Reference Center for Viruses of Respiratory Infections, Institut Pasteur, Paris                | Méline Albert, Marion Barbet, Sylvie Behillil, Méline Bizard, Angela Brisebarre, Flora Donati Vincent Enouf, Maud Vanpeene, Sylvie van der Werf, Raulin Olivia                                                                                                      |
| EPI_ISL_414639 | hCoV-19/USA/NY-NYUMC1/2020        | North America / USA / New York / Na    | 2020-03-04 | NYU Langone Health                                                                                             | Departments of Pathology and Medicine, New York University School of Medicine                           | John Chen, Dacia Dimartino, Xiaojun Feng, Adriana Heguy, Megan Hogan, Emily Huang, George Jour, Christian Marier, Matthew T. Maurano, Mark J. Mulligan, Peter Meyn, Marie Samanovic-Golden, Amy Rapkiewicz, Guomiao Shen, Matija Snuderl, Gael Westby, Paul Zappile |
| EPI_ISL_414640 | hCoV-19/Finland/FIN-114/2020      | Europe / Finland                       | 2020-03-01 | Department of Virology and Immunology, University of Helsinki and Helsinki University Hospital, Huslab Finland | Department of Virology, Faculty of Medicine, University of Helsinki, Helsinki, Finland                  | Teemu Smura, Hannimari Kallio-Kokko, Olli Vapalahti                                                                                                                                                                                                                 |
| EPI_ISL_414641 | hCoV-19/Finland/FIN-313/2020      | Europe / Finland                       | 2020-03-05 | Department of Virology and Immunology, University of Helsinki and Helsinki University Hospital, Huslab Finland | Department of Virology, Faculty of Medicine, University of Helsinki, Helsinki, Finland                  | Teemu Smura, Hannimari Kallio-Kokko, Olli Vapalahti                                                                                                                                                                                                                 |

|                |                                 |                                       |            |                                                                                                                                                                                                                  |                                                                                        |                                                                                                                                                                                                                                                                                                                                                                                                                                                          |
|----------------|---------------------------------|---------------------------------------|------------|------------------------------------------------------------------------------------------------------------------------------------------------------------------------------------------------------------------|----------------------------------------------------------------------------------------|----------------------------------------------------------------------------------------------------------------------------------------------------------------------------------------------------------------------------------------------------------------------------------------------------------------------------------------------------------------------------------------------------------------------------------------------------------|
| EPI_ISL_414642 | hCoV-19/Finland/FIN-455/2020    | Europe / Finland                      | 2020-03-08 | Department of Virology and Immunology, University of Helsinki and Helsinki University Hospital, Huslab Finland                                                                                                   | Department of Virology, Faculty of Medicine, University of Helsinki, Helsinki, Finland | Teemu Smura, Hannimari Kallio-Kokko, Olli Vapalahti                                                                                                                                                                                                                                                                                                                                                                                                      |
| EPI_ISL_414643 | hCoV-19/Finland/FIN-508/2020    | Europe / Finland                      | 2020-03-07 | Department of Virology and Immunology, University of Helsinki and Helsinki University Hospital, Huslab Finland                                                                                                   | Department of Virology, Faculty of Medicine, University of Helsinki, Helsinki, Finland | Teemu Smura, Hannimari Kallio-Kokko, Olli Vapalahti                                                                                                                                                                                                                                                                                                                                                                                                      |
| EPI_ISL_414644 | hCoV-19/Finland/FIN-318/2020    | Europe / Finland                      | 2020-03-04 | Department of Virology and Immunology, University of Helsinki and Helsinki University Hospital, Huslab Finland                                                                                                   | Department of Virology, Faculty of Medicine, University of Helsinki, Helsinki, Finland | Teemu Smura, Hannimari Kallio-Kokko, Olli Vapalahti                                                                                                                                                                                                                                                                                                                                                                                                      |
| EPI_ISL_414645 | hCoV-19/Finland/FIN-274/2020    | Europe / Finland                      | 2020-03-04 | Department of Virology and Immunology, University of Helsinki and Helsinki University Hospital, Huslab Finland                                                                                                   | Department of Virology, Faculty of Medicine, University of Helsinki, Helsinki, Finland | Teemu Smura, Hannimari Kallio-Kokko, Olli Vapalahti                                                                                                                                                                                                                                                                                                                                                                                                      |
| EPI_ISL_414646 | hCoV-19/Finland/FIN-266/2020    | Europe / Finland                      | 2020-03-04 | Department of Virology and Immunology, University of Helsinki and Helsinki University Hospital, Huslab Finland                                                                                                   | Department of Virology, Faculty of Medicine, University of Helsinki, Helsinki, Finland | Teemu Smura, Hannimari Kallio-Kokko, Olli Vapalahti                                                                                                                                                                                                                                                                                                                                                                                                      |
| EPI_ISL_414647 | hCoV-19/DRC/KN-13/2020          | Africa / Democratic Republic of the C | 2020-03-09 | Viral Respiratory Lab, National Institute for Biomedical Research (INRB)                                                                                                                                         | Pathogen Sequencing Lab, National Institute for Biomedical Research (INRB)             | Placide Mbala-Kingebeni, Edith Nkwembe, Eddy Kinganda-Lusamaki, Amuri Aziza, Catherine Pratt, Matthias Pauthner, Josh Quick, Allison Black, James Hadfield, Trevor Bedford, Ian Goodfellow, Nick Loman, Kristian Andersen, Michael Wiley, Steve Ahuka-Mundeye, Jean-Jacques Muyembe Tamfum Mark Zeller, Catie Anderson, Emily Spender, Sarah Topol, Raphaelle Klitting, Refugio Robles-Sikisaka, Karthik Gangavarapu, Laura Nicholson, Kristian Andersen |
| EPI_ISL_414648 | hCoV-19/USA/CA-PC101P/2020      | North America / USA / California / Sa | 2020-03-11 | Andersen Lab, The Scripps Research Institute                                                                                                                                                                     | Andersen Lab, The Scripps Research Institute                                           |                                                                                                                                                                                                                                                                                                                                                                                                                                                          |
| EPI_ISL_414663 | hCoV-19/Guangzhou/GZMU0016/2020 | Asia / China / Guangdong / Guangzhr   | 2020-02-25 | State Key Laboratory of Respiratory Disease, National Clinical Research Center for Respiratory Disease, Guangzhou Institute of Respiratory Health, the First Affiliated Hospital of Guangzhou Medical University | the First Affiliated Hospital of Guangzhou Medical University & BGI-Shenzhen           | Zhao et al                                                                                                                                                                                                                                                                                                                                                                                                                                               |
| EPI_ISL_414686 | hCoV-19/Guangzhou/GZMU0030/2020 | Asia / China / Guangdong / Guangzhr   | 2020-02-27 | State Key Laboratory of Respiratory Disease, National Clinical Research Center for Respiratory Disease, Guangzhou Institute of Respiratory Health, the First Affiliated Hospital of Guangzhou Medical University | The First Affiliated Hospital of Guangzhou Medical University & BGI-Shenzhen           | Zhao et al                                                                                                                                                                                                                                                                                                                                                                                                                                               |
| EPI_ISL_414687 | hCoV-19/Guangzhou/GZMU0031/2020 | Asia / China / Guangdong / Guangzhr   | 2020-02-25 | State Key Laboratory of Respiratory Disease, National Clinical Research Center for Respiratory Disease, Guangzhou Institute of Respiratory Health, the First Affiliated Hospital of Guangzhou Medical University | the First Affiliated Hospital of Guangzhou Medical University & BGI-Shenzhen           | Zhao et al                                                                                                                                                                                                                                                                                                                                                                                                                                               |
| EPI_ISL_414688 | hCoV-19/Guangzhou/GZMU0042/2020 | Asia / China / Guangdong / Guangzhr   | 2020-02-25 | State Key Laboratory of Respiratory Disease, National Clinical Research Center for Respiratory Disease, Guangzhou Institute of Respiratory Health, the First Affiliated Hospital of Guangzhou Medical University | The First Affiliated Hospital of Guangzhou Medical University & BGI-Shenzhen           | Zhao et al                                                                                                                                                                                                                                                                                                                                                                                                                                               |
| EPI_ISL_414689 | hCoV-19/Guangzhou/GZMU0044/2020 | Asia / China / Guangdong / Guangzhr   | 2020-02-25 | State Key Laboratory of Respiratory Disease, National Clinical Research Center for Respiratory Disease, Guangzhou Institute of Respiratory Health, the First Affiliated Hospital of Guangzhou Medical University | The First Affiliated Hospital of Guangzhou Medical University & BGI-Shenzhen           | Zhao et al                                                                                                                                                                                                                                                                                                                                                                                                                                               |
| EPI_ISL_414690 | hCoV-19/Guangzhou/GZMU0047/2020 | Asia / China / Guangdong / Guangzhr   | 2020-02-25 | State Key Laboratory of Respiratory Disease, National Clinical Research Center for Respiratory Disease, Guangzhou Institute of Respiratory Health, the First Affiliated Hospital of Guangzhou Medical University | The First Affiliated Hospital of Guangzhou Medical University & BGI-Shenzhen           | Zhao et al                                                                                                                                                                                                                                                                                                                                                                                                                                               |
| EPI_ISL_414691 | hCoV-19/Guangzhou/GZMU0048/2020 | Asia / China / Guangdong / Guangzhr   | 2020-02-25 | State Key Laboratory of Respiratory Disease, National Clinical Research Center for Respiratory Disease, Guangzhou Institute of Respiratory Health, the First Affiliated Hospital of Guangzhou Medical University | The First Affiliated Hospital of Guangzhou Medical University & BGI-Shenzhen           | Zhao et al                                                                                                                                                                                                                                                                                                                                                                                                                                               |
| EPI_ISL_414692 | hCoV-19/Guangzhou/GZMU0014/2020 | Asia / China / Guangdong / Guangzhr   | 2020-02-25 | Hospital of Guangzhou Medical University                                                                                                                                                                         | The First Affiliated Hospital of Guangzhou Medical University & BGI-Shenzhen           | Zhao et al                                                                                                                                                                                                                                                                                                                                                                                                                                               |
| EPI_ISL_414934 | hCoV-19/Shandong/LY001-2/2020   | Asia / China / Shandong               | 2020-01-21 | Shandong Provincial Center for Disease Control and Prevention                                                                                                                                                    | Beijing Institute of Microbiology and Epidemiology                                     | Xiao-Lin Jiang, Xiao-Li Zhang, Xiang-Na Zhao, Cun-Bao Li, Jie Lei, Zeng-Qiang Kou, Wen-Kui Sun, Yang Hang, Feng Gao, Sheng-Xiang Ji, Can-Fang Lin, Bo Pang, Ming-Xiao Yao, Guo-Lin Wang, Lin Yao, Li-Jun Duan, Xiao Wei, Dian-Ming Kang, Mai-Juan Ma                                                                                                                                                                                                     |
| EPI_ISL_414935 | hCoV-19/Shandong/LY002-2/2020   | Asia / China / Shandong               | 2020-01-21 | Shandong Provincial Center for Disease Control and Prevention                                                                                                                                                    | Beijing Institute of Microbiology and Epidemiology                                     | Xiao-Lin Jiang, Xiao-Li Zhang, Xiang-Na Zhao, Cun-Bao Li, Jie Lei, Zeng-Qiang Kou, Wen-Kui Sun, Yang Hang, Feng Gao, Sheng-Xiang Ji, Can-Fang Lin, Bo Pang, Ming-Xiao Yao, Guo-Lin Wang, Lin Yao, Li-Jun Duan, Xiao Wei, Dian-Ming Kang, Mai-Juan Ma                                                                                                                                                                                                     |
| EPI_ISL_414936 | hCoV-19/Shandong/LY003-2/2020   | Asia / China / Shandong               | 2020-01-23 | Shandong Provincial Center for Disease Control and Prevention                                                                                                                                                    | Beijing Institute of Microbiology and Epidemiology                                     | Xiao-Lin Jiang, Xiao-Li Zhang, Xiang-Na Zhao, Cun-Bao Li, Jie Lei, Zeng-Qiang Kou, Wen-Kui Sun, Yang Hang, Feng Gao, Sheng-Xiang Ji, Can-Fang Lin, Bo Pang, Ming-Xiao Yao, Guo-Lin Wang, Lin Yao, Li-Jun Duan, Xiao Wei, Dian-Ming Kang, Mai-Juan Ma                                                                                                                                                                                                     |
| EPI_ISL_414937 | hCoV-19/Shandong/LY004-2/2020   | Asia / China / Shandong               | 2020-01-26 | Shandong Provincial Center for Disease Control and Prevention                                                                                                                                                    | Beijing Institute of Microbiology and Epidemiology                                     | Xiao-Lin Jiang, Xiao-Li Zhang, Xiang-Na Zhao, Cun-Bao Li, Jie Lei, Zeng-Qiang Kou, Wen-Kui Sun, Yang Hang, Feng Gao, Sheng-Xiang Ji, Can-Fang Lin, Bo Pang, Ming-Xiao Yao, Guo-Lin Wang, Lin Yao, Li-Jun Duan, Xiao Wei, Dian-Ming Kang, Mai-Juan Ma                                                                                                                                                                                                     |
| EPI_ISL_414938 | hCoV-19/Shandong/LY005-2/2020   | Asia / China / Shandong               | 2020-01-24 | Shandong Provincial Center for Disease Control and Prevention                                                                                                                                                    | Beijing Institute of Microbiology and Epidemiology                                     | Xiao-Lin Jiang, Xiao-Li Zhang, Xiang-Na Zhao, Cun-Bao Li, Jie Lei, Zeng-Qiang Kou, Wen-Kui Sun, Yang Hang, Feng Gao, Sheng-Xiang Ji, Can-Fang Lin, Bo Pang, Ming-Xiao Yao, Guo-Lin Wang, Lin Yao, Li-Jun Duan, Xiao Wei, Dian-Ming Kang, Mai-Juan Ma                                                                                                                                                                                                     |

|                |                                       |                                            |            |                                                                                |                                                                                       |                                                                                                                                                                                                                                                      |
|----------------|---------------------------------------|--------------------------------------------|------------|--------------------------------------------------------------------------------|---------------------------------------------------------------------------------------|------------------------------------------------------------------------------------------------------------------------------------------------------------------------------------------------------------------------------------------------------|
| EPI_ISL_414939 | hCoV-19/Shandong/LY006-2/2020         | Asia / China / Shandong                    | 2020-01-25 | Shandong Provincial Center for Disease Control and Prevention                  | Beijing Institute of Microbiology and Epidemiology                                    | Xiao-Lin Jiang, Xiao-Li Zhang, Xiang-Na Zhao, Cun-Bao Li, Jie Lei, Zeng-Qiang Kou, Wen-Kui Sun, Yang Hang, Feng Gao, Sheng-Xiang Ji, Can-Fang Lin, Bo Pang, Ming-Xiao Yao, Guo-Lin Wang, Lin Yao, Li-Jun Duan, Xiao Wei, Dian-Ming Kang, Mai-Juan Ma |
| EPI_ISL_414940 | hCoV-19/Shandong/LY007-2/2020         | Asia / China / Shandong                    | 2020-01-25 | Shandong Provincial Center for Disease Control and Prevention                  | Beijing Institute of Microbiology and Epidemiology                                    | Xiao-Lin Jiang, Xiao-Li Zhang, Xiang-Na Zhao, Cun-Bao Li, Jie Lei, Zeng-Qiang Kou, Wen-Kui Sun, Yang Hang, Feng Gao, Sheng-Xiang Ji, Can-Fang Lin, Bo Pang, Ming-Xiao Yao, Guo-Lin Wang, Lin Yao, Li-Jun Duan, Xiao Wei, Dian-Ming Kang, Mai-Juan Ma |
| EPI_ISL_414941 | hCoV-19/Shandong/LY008-2/2020         | Asia / China / Shandong                    | 2020-01-30 | Shandong Provincial Center for Disease Control and Prevention                  | Beijing Institute of Microbiology and Epidemiology                                    | Xiao-Lin Jiang, Xiao-Li Zhang, Xiang-Na Zhao, Cun-Bao Li, Jie Lei, Zeng-Qiang Kou, Wen-Kui Sun, Yang Hang, Feng Gao, Sheng-Xiang Ji, Can-Fang Lin, Bo Pang, Ming-Xiao Yao, Guo-Lin Wang, Lin Yao, Li-Jun Duan, Xiao Wei, Dian-Ming Kang, Mai-Juan Ma |
| EPI_ISL_414945 | hCoV-19/Iran/Qom-257045/2020          | Asia / Iran / Qom                          | 2020-02-15 | Iran National Influenza Center                                                 | Iran National Influenza Center                                                        | Nazanin Zahra Shafiei Jandaghi, Jila Yavarian, Kaveh Sadeghi, Vahid Salimi, Simin Abbasi, Saeedeh Mahfozi and Talat Mokhtari Azad                                                                                                                    |
| EPI_ISL_414946 | hCoV-19/Iran/Qom-257531/2020          | Asia / Iran / Qom                          | 2020-02-17 | Iran National Influenza Center                                                 | Iran National Influenza Center                                                        | Jila Yavarian, Nazanin Zahra Shafiei Jandaghi and Talat Mokhtari Azad                                                                                                                                                                                |
| EPI_ISL_414948 | hCoV-19/Iran/Tehran-288885/2020       | Asia / Iran / Tehran                       | 2020-03-08 | Iran National Influenza Center                                                 | Iran National Influenza Center                                                        | Jila Yavarian, Nazanin Zahra Shafiei Jandaghi and Talat Mokhtari Azad                                                                                                                                                                                |
| EPI_ISL_414949 | hCoV-19/Northern Ireland/HSCNI01/2020 | Europe / United Kingdom / Northern Ireland | 2020-02-26 | Regional Virus Laboratory, Belfast                                             | Public Health Wales Microbiology Cardiff                                              | Catherine Moore, Joanne Watkins, Sally Corden, Tom Connor                                                                                                                                                                                            |
| EPI_ISL_415041 | hCoV-19/Wales/PHW04/2020              | Europe / United Kingdom / Wales            | 2020-03-07 | Wales Specialist Virology Centre                                               | Public Health Wales Microbiology Cardiff                                              | Tanya Curran, Conall McCaughey, Catherine Moore, Joanne Watkins, Sally Corden, Tom Connor                                                                                                                                                            |
| EPI_ISL_415105 | hCoV-19/Brazil/BA-312/2020            | South America / Brazil / Bahia / Feira     | 2020-03-04 | Laboratório Central de Saúde Pública Professor Gonçalves Moniz – LACEN/BA      | Instituto Oswaldo Cruz FIOCRUZ - Laboratory of Respiratory Viruses and Measles (LVRS) | Paola Resende, Allison Fabri, Joilson Xavier, Sunando Roy, Fernando Motta, Aline Mattos, Milene Miranda, Cristiana Garcia, Braulio Caetano, Maria Ogrzewalska, Jonathan Lopes, Luciana Appolinario, Maria Nóbrega, Marilda Siqueira                  |
| EPI_ISL_415128 | hCoV-19/Brazil/ES-225/2020            | South America / Brazil / Espírito Santo    | 2020-02-29 | LACEN/ES - Laboratório Central de Saúde Pública do Espírito Santo              | Instituto Oswaldo Cruz FIOCRUZ - Laboratory of Respiratory Viruses and Measles (LVRS) | Paola Resende, Allison Fabri, Joilson Xavier, Sunando Roy, Fernando Motta, Aline Mattos, Milene Miranda, Cristiana Garcia, Braulio Caetano, Maria Ogrzewalska, Jonathan Lopes, Luciana Appolinario, Maria Nóbrega, Marilda Siqueira                  |
| EPI_ISL_415129 | hCoV-19/England/20099038206/2020      | Europe / United Kingdom / England          | 2020-02-29 | Respiratory Virus Unit, Microbiology Services Colindale, Public Health England | Respiratory Virus Unit, Microbiology Services Colindale, Public Health England        | Monica Galiano, Shahjahan Miah, Angie Lackenby, Omolola Akinbami, Tiina Talts, Leena Bhaw, Richard Myers, Steven Platt, Kirstin Edwards, Jonathan Hubb, Joanna Ellis, Maria Zambon                                                                   |
| EPI_ISL_415130 | hCoV-19/England/20099079106/2020      | Europe / United Kingdom / England          | 2020-03-01 | Respiratory Virus Unit, Microbiology Services Colindale, Public Health England | Respiratory Virus Unit, Microbiology Services Colindale, Public Health England        | Monica Galiano, Shahjahan Miah, Angie Lackenby, Omolola Akinbami, Tiina Talts, Leena Bhaw, Richard Myers, Steven Platt, Kirstin Edwards, Jonathan Hubb, Joanna Ellis, Maria Zambon                                                                   |
| EPI_ISL_415131 | hCoV-19/England/20099107406/2020      | Europe / United Kingdom / England          | 2020-02-29 | Respiratory Virus Unit, Microbiology Services Colindale, Public Health England | Respiratory Virus Unit, Microbiology Services Colindale, Public Health England        | Monica Galiano, Shahjahan Miah, Angie Lackenby, Omolola Akinbami, Tiina Talts, Leena Bhaw, Richard Myers, Steven Platt, Kirstin Edwards, Jonathan Hubb, Joanna Ellis, Maria Zambon                                                                   |
| EPI_ISL_415132 | hCoV-19/England/20100001406/2020      | Europe / United Kingdom / England          | 2020-02-28 | Respiratory Virus Unit, Microbiology Services Colindale, Public Health England | Respiratory Virus Unit, Microbiology Services Colindale, Public Health England        | Monica Galiano, Shahjahan Miah, Angie Lackenby, Omolola Akinbami, Tiina Talts, Leena Bhaw, Richard Myers, Steven Platt, Kirstin Edwards, Jonathan Hubb, Joanna Ellis, Maria Zambon                                                                   |
| EPI_ISL_415133 | hCoV-19/England/20100004706/2020      | Europe / United Kingdom / England          | 2020-02-29 | Respiratory Virus Unit, Microbiology Services Colindale, Public Health England | Respiratory Virus Unit, Microbiology Services Colindale, Public Health England        | Monica Galiano, Shahjahan Miah, Angie Lackenby, Omolola Akinbami, Tiina Talts, Leena Bhaw, Richard Myers, Steven Platt, Kirstin Edwards, Jonathan Hubb, Joanna Ellis, Maria Zambon                                                                   |
| EPI_ISL_415134 | hCoV-19/England/20100004806/2020      | Europe / United Kingdom / England          | 2020-02-29 | Respiratory Virus Unit, Microbiology Services Colindale, Public Health England | Respiratory Virus Unit, Microbiology Services Colindale, Public Health England        | Monica Galiano, Shahjahan Miah, Angie Lackenby, Omolola Akinbami, Tiina Talts, Leena Bhaw, Richard Myers, Steven Platt, Kirstin Edwards, Jonathan Hubb, Joanna Ellis, Maria Zambon                                                                   |
| EPI_ISL_415135 | hCoV-19/England/20100005406/2020      | Europe / United Kingdom / England          | 2020-02-28 | Respiratory Virus Unit, Microbiology Services Colindale, Public Health England | Respiratory Virus Unit, Microbiology Services Colindale, Public Health England        | Monica Galiano, Shahjahan Miah, Angie Lackenby, Omolola Akinbami, Tiina Talts, Leena Bhaw, Richard Myers, Steven Platt, Kirstin Edwards, Jonathan Hubb, Joanna Ellis, Maria Zambon                                                                   |
| EPI_ISL_415136 | hCoV-19/England/20100022706/2020      | Europe / United Kingdom / England          | 2020-02-29 | Respiratory Virus Unit, Microbiology Services Colindale, Public Health England | Respiratory Virus Unit, Microbiology Services Colindale, Public Health England        | Monica Galiano, Shahjahan Miah, Angie Lackenby, Omolola Akinbami, Tiina Talts, Leena Bhaw, Richard Myers, Steven Platt, Kirstin Edwards, Jonathan Hubb, Joanna Ellis, Maria Zambon                                                                   |
| EPI_ISL_415137 | hCoV-19/England/20100023206/2020      | Europe / United Kingdom / England          | 2020-03-02 | Respiratory Virus Unit, Microbiology Services Colindale, Public Health England | Respiratory Virus Unit, Microbiology Services Colindale, Public Health England        | Monica Galiano, Shahjahan Miah, Angie Lackenby, Omolola Akinbami, Tiina Talts, Leena Bhaw, Richard Myers, Steven Platt, Kirstin Edwards, Jonathan Hubb, Joanna Ellis, Maria Zambon                                                                   |
| EPI_ISL_415138 | hCoV-19/England/20100024006/2020      | Europe / United Kingdom / England          | 2020-03-02 | Respiratory Virus Unit, Microbiology Services Colindale, Public Health England | Respiratory Virus Unit, Microbiology Services Colindale, Public Health England        | Monica Galiano, Shahjahan Miah, Angie Lackenby, Omolola Akinbami, Tiina Talts, Leena Bhaw, Richard Myers, Steven Platt, Kirstin Edwards, Jonathan Hubb, Joanna Ellis, Maria Zambon                                                                   |
| EPI_ISL_415139 | hCoV-19/England/20100077906/2020      | Europe / United Kingdom / England          | 2020-03-01 | Respiratory Virus Unit, Microbiology Services Colindale, Public Health England | Respiratory Virus Unit, Microbiology Services Colindale, Public Health England        | Monica Galiano, Shahjahan Miah, Angie Lackenby, Omolola Akinbami, Tiina Talts, Leena Bhaw, Richard Myers, Steven Platt, Kirstin Edwards, Jonathan Hubb, Joanna Ellis, Maria Zambon                                                                   |
| EPI_ISL_415140 | hCoV-19/England/20100121006/2020      | Europe / United Kingdom / England          | 2020-02-29 | Respiratory Virus Unit, Microbiology Services Colindale, Public Health England | Respiratory Virus Unit, Microbiology Services Colindale, Public Health England        | Monica Galiano, Shahjahan Miah, Angie Lackenby, Omolola Akinbami, Tiina Talts, Leena Bhaw, Richard Myers, Steven Platt, Kirstin Edwards, Jonathan Hubb, Joanna Ellis, Maria Zambon                                                                   |
| EPI_ISL_415141 | hCoV-19/England/20100121007/2020      | Europe / United Kingdom / England          | 2020-02-29 | Respiratory Virus Unit, Microbiology Services Colindale, Public Health England | Respiratory Virus Unit, Microbiology Services Colindale, Public Health England        | Monica Galiano, Shahjahan Miah, Angie Lackenby, Omolola Akinbami, Tiina Talts, Leena Bhaw, Richard Myers, Steven Platt, Kirstin Edwards, Jonathan Hubb, Joanna Ellis, Maria Zambon                                                                   |
| EPI_ISL_415142 | hCoV-19/England/20100122106/2020      | Europe / United Kingdom / England          | 2020-03-02 | Respiratory Virus Unit, Microbiology Services Colindale, Public Health England | Respiratory Virus Unit, Microbiology Services Colindale, Public Health England        | Monica Galiano, Shahjahan Miah, Angie Lackenby, Omolola Akinbami, Tiina Talts, Leena Bhaw, Richard Myers, Steven Platt, Kirstin Edwards, Jonathan Hubb, Joanna Ellis, Maria Zambon                                                                   |

|                |                                         |                                     |            |                                                                                |                                                                                |                                                                                                                                                                                                                                                                                                                                                                                                                                   |
|----------------|-----------------------------------------|-------------------------------------|------------|--------------------------------------------------------------------------------|--------------------------------------------------------------------------------|-----------------------------------------------------------------------------------------------------------------------------------------------------------------------------------------------------------------------------------------------------------------------------------------------------------------------------------------------------------------------------------------------------------------------------------|
| EPI_ISL_415143 | hCoV-19/England/20100122107/2020        | Europe / United Kingdom / England   | 2020-03-02 | Respiratory Virus Unit, Microbiology Services Colindale, Public Health England | Respiratory Virus Unit, Microbiology Services Colindale, Public Health England | Monica Galiano, Shahjahan Miah, Angie Lackenby, Omolola Akinbami, Tiina Talts, Leena Bhaw, Richard Myers, Steven Platt, Kirstin Edwards, Jonathan Hubb, Joanna Ellis, Maria Zambon                                                                                                                                                                                                                                                |
| EPI_ISL_415144 | hCoV-19/England/20102000106/2020        | Europe / United Kingdom / England   | 2020-02-27 | Respiratory Virus Unit, Microbiology Services Colindale, Public Health England | Respiratory Virus Unit, Microbiology Services Colindale, Public Health England | Monica Galiano, Shahjahan Miah, Angie Lackenby, Omolola Akinbami, Tiina Talts, Leena Bhaw, Richard Myers, Steven Platt, Kirstin Edwards, Jonathan Hubb, Joanna Ellis, Maria Zambon                                                                                                                                                                                                                                                |
| EPI_ISL_415145 | hCoV-19/England/20102000206/2020        | Europe / United Kingdom / England   | 2020-03-01 | Respiratory Virus Unit, Microbiology Services Colindale, Public Health England | Respiratory Virus Unit, Microbiology Services Colindale, Public Health England | Monica Galiano, Shahjahan Miah, Angie Lackenby, Omolola Akinbami, Tiina Talts, Leena Bhaw, Richard Myers, Steven Platt, Kirstin Edwards, Jonathan Hubb, Joanna Ellis, Maria Zambon                                                                                                                                                                                                                                                |
| EPI_ISL_415146 | hCoV-19/England/20102000306/2020        | Europe / United Kingdom / England   | 2020-03-01 | Respiratory Virus Unit, Microbiology Services Colindale, Public Health England | Respiratory Virus Unit, Microbiology Services Colindale, Public Health England | Monica Galiano, Shahjahan Miah, Angie Lackenby, Omolola Akinbami, Tiina Talts, Leena Bhaw, Richard Myers, Steven Platt, Kirstin Edwards, Jonathan Hubb, Joanna Ellis, Maria Zambon                                                                                                                                                                                                                                                |
| EPI_ISL_415147 | hCoV-19/England/20102000506/2020        | Europe / United Kingdom / England   | 2020-03-01 | Respiratory Virus Unit, Microbiology Services Colindale, Public Health England | Respiratory Virus Unit, Microbiology Services Colindale, Public Health England | Monica Galiano, Shahjahan Miah, Angie Lackenby, Omolola Akinbami, Tiina Talts, Leena Bhaw, Richard Myers, Steven Platt, Kirstin Edwards, Jonathan Hubb, Joanna Ellis, Maria Zambon                                                                                                                                                                                                                                                |
| EPI_ISL_415148 | hCoV-19/England/20102000906/2020        | Europe / United Kingdom / England   | 2020-03-03 | Respiratory Virus Unit, Microbiology Services Colindale, Public Health England | Respiratory Virus Unit, Microbiology Services Colindale, Public Health England | Monica Galiano, Shahjahan Miah, Angie Lackenby, Omolola Akinbami, Tiina Talts, Leena Bhaw, Richard Myers, Steven Platt, Kirstin Edwards, Jonathan Hubb, Joanna Ellis, Maria Zambon                                                                                                                                                                                                                                                |
| EPI_ISL_415149 | hCoV-19/England/20102068506/2020        | Europe / United Kingdom / England   | 2020-03-01 | Respiratory Virus Unit, Microbiology Services Colindale, Public Health England | Respiratory Virus Unit, Microbiology Services Colindale, Public Health England | Monica Galiano, Shahjahan Miah, Angie Lackenby, Omolola Akinbami, Tiina Talts, Leena Bhaw, Richard Myers, Steven Platt, Kirstin Edwards, Jonathan Hubb, Joanna Ellis, Maria Zambon                                                                                                                                                                                                                                                |
| EPI_ISL_415150 | hCoV-19/England/20110003506/2020        | Europe / United Kingdom / England   | 2020-03-09 | Respiratory Virus Unit, Microbiology Services Colindale, Public Health England | Respiratory Virus Unit, Microbiology Services Colindale, Public Health England | Monica Galiano, Shahjahan Miah, Angie Lackenby, Omolola Akinbami, Tiina Talts, Leena Bhaw, Richard Myers, Steven Platt, Kirstin Edwards, Jonathan Hubb, Joanna Ellis, Maria Zambon                                                                                                                                                                                                                                                |
| EPI_ISL_415151 | hCoV-19/USA/NY2-PV08100/2020            | North America / USA / New York      | 2020-03-04 | MSSH Clinical Microbiology Laboratories                                        | MSSH Pathogen Surveillance Program                                             | Gopi Patel, Emilia Sordillo, Melissa Gitman, Alberto Paniz-mondolfi, Matthew Hernandez, Shelcie Fabre, Jose Polanco, Ana Silvia Gonzalez-Reiche, Zenab Khan, Nancy Francoeur, Melissa Smith, Robert Sebra, Lisa Miorin, Wen-chun Liu, Randy Albrecht, Judith Aberg, Florian Krammer, Adolfo Garcia-Sarstre, Viviana Simon, Harm van Bakel                                                                                         |
| EPI_ISL_415152 | hCoV-19/Panama/328677/2020              | Central America / Panama / Panama   | 2020-03-06 | Gorgas Memorial Institute for Health Studies                                   | Gorgas Memorial Institute for Health Studies                                   | Daniilo Franco, Sandra Lopez-Verges, Eimelec Valdespino, Claudia Gonzalez, Oris Chavarria, Ambar Moreno, Yamika Diaz, Leyda Abrego, Juan M. Pascale, Alexander A. Martinez                                                                                                                                                                                                                                                        |
| EPI_ISL_415153 | hCoV-19/Belgium/VLM-03011/2020          | Europe / Belgium / Huldenberg       | 2020-03-03 | KU Leuven, Clinical and Epidemiological Virology                               | KU Leuven, Clinical and Epidemiological Virology                               | Bert Vanmechelen, Joan Marti-Carreras, Tony Wawina, Marc Van Ranst, Piet Maes                                                                                                                                                                                                                                                                                                                                                     |
| EPI_ISL_415154 | hCoV-19/Belgium/BM-03012/2020           | Europe / Belgium / Kraainem         | 2020-03-01 | KU Leuven, Clinical and Epidemiological Virology                               | KU Leuven, Clinical and Epidemiological Virology                               | Bert Vanmechelen, Joan Marti-Carreras, Tony Wawina, Marc Van Ranst, Piet Maes                                                                                                                                                                                                                                                                                                                                                     |
| EPI_ISL_415155 | hCoV-19/Belgium/VAG-03013/2020          | Europe / Belgium / Huldenberg       | 2020-03-01 | KU Leuven, Clinical and Epidemiological Virology                               | KU Leuven, Clinical and Epidemiological Virology                               | Bert Vanmechelen, Joan Marti-Carreras, Tony Wawina, Marc Van Ranst, Piet Maes                                                                                                                                                                                                                                                                                                                                                     |
| EPI_ISL_415156 | hCoV-19/Belgium/SH-03014/2020           | Europe / Belgium / Huldenberg       | 2020-03-01 | KU Leuven, Clinical and Epidemiological Virology                               | KU Leuven, Clinical and Epidemiological Virology                               | Bert Vanmechelen, Joan Marti-Carreras, Tony Wawina, Piet Maes                                                                                                                                                                                                                                                                                                                                                                     |
| EPI_ISL_415157 | hCoV-19/Belgium/BC-03016/2020           | Europe / Belgium / Sint-Niklaas     | 2020-03-01 | KU Leuven, Clinical and Epidemiological Virology                               | KU Leuven, Clinical and Epidemiological Virology                               | Bert Vanmechelen, Joan Marti-Carreras, Tony Wawina, Piet Maes                                                                                                                                                                                                                                                                                                                                                                     |
| EPI_ISL_415158 | hCoV-19/Belgium/QKJ-03015/2020          | Europe / Belgium / Brussels         | 2020-03-01 | KU Leuven, Clinical and Epidemiological Virology                               | KU Leuven, Clinical and Epidemiological Virology                               | Bert Vanmechelen, Joan Marti-Carreras, Tony Wawina, Piet Maes                                                                                                                                                                                                                                                                                                                                                                     |
| EPI_ISL_415159 | hCoV-19/Belgium/BA-02291/2020           | Europe / Belgium / Leuven           | 2020-02-29 | KU Leuven, Clinical and Epidemiological Virology                               | KU Leuven, Clinical and Epidemiological Virology                               | Bert Vanmechelen, Joan Marti-Carreras, Tony Wawina, Piet Maes                                                                                                                                                                                                                                                                                                                                                                     |
| EPI_ISL_415435 | hCoV-19/Wales/PHW06/2020                | Europe / United Kingdom / Wales     | 2020-03-06 | Wales Specialist Virology Centre                                               | Public Health Wales Microbiology Cardiff                                       | Catherine Moore, Joanne Watkins, Sally Corden, Tom Connor                                                                                                                                                                                                                                                                                                                                                                         |
| EPI_ISL_415453 | hCoV-19/Wales/PHW10/2020                | Europe / United Kingdom / Wales / C | 2020-03-10 | Wales Specialist Virology Centre                                               | Public Health Wales Microbiology Cardiff                                       | Catherine Moore, Joanne Watkins, Sally Corden, Tom Connor                                                                                                                                                                                                                                                                                                                                                                         |
| EPI_ISL_415454 | hCoV-19/Switzerland/GE1422/2020         | Europe / Switzerland                | 2020-02-28 | Hôpitaux universitaires de Genève Laboratoire de Virologie                     | Hôpitaux universitaires de Genève Laboratoire de Virologie                     | Laubscher F.                                                                                                                                                                                                                                                                                                                                                                                                                      |
| EPI_ISL_415455 | hCoV-19/Switzerland/GE0199/2020         | Europe / Switzerland                | 2020-02-28 | Hôpitaux universitaires de Genève Laboratoire de Virologie                     | Hôpitaux universitaires de Genève Laboratoire de Virologie                     | Laubscher F.                                                                                                                                                                                                                                                                                                                                                                                                                      |
| EPI_ISL_415456 | hCoV-19/Switzerland/BE6651/2020         | Europe / Switzerland                | 2020-02-29 | Hôpitaux universitaires de Genève Laboratoire de Virologie                     | Hôpitaux universitaires de Genève Laboratoire de Virologie                     | Laubscher F.                                                                                                                                                                                                                                                                                                                                                                                                                      |
| EPI_ISL_415457 | hCoV-19/Switzerland/AG7120/2020         | Europe / Switzerland                | 2020-02-29 | Hôpitaux universitaires de Genève Laboratoire de Virologie                     | Hôpitaux universitaires de Genève Laboratoire de Virologie                     | Laubscher F.                                                                                                                                                                                                                                                                                                                                                                                                                      |
| EPI_ISL_415458 | hCoV-19/Switzerland/GE8102/2020         | Europe / Switzerland                | 2020-03-01 | Hôpitaux universitaires de Genève Laboratoire de Virologie                     | Hôpitaux universitaires de Genève Laboratoire de Virologie                     | Laubscher F.                                                                                                                                                                                                                                                                                                                                                                                                                      |
| EPI_ISL_415459 | hCoV-19/Switzerland/VD0503/2020         | Europe / Switzerland / Genève       | 2020-02-29 | Hôpitaux universitaires de Genève Laboratoire de Virologie                     | Hôpitaux universitaires de Genève Laboratoire de Virologie                     | Laubscher F.                                                                                                                                                                                                                                                                                                                                                                                                                      |
| EPI_ISL_415460 | hCoV-19/Netherlands/Flevoland_1/2020    | Europe / Netherlands / Flevoland    | 2020-03-09 | Dutch COVID-19 response team                                                   | Erasmus Medical Center                                                         | David Nieuwenhuijse, Bas Oude Munnink, Reina Sikkema, Claudia Schapendonk, Irina Chestakova, Anne van der Linden, Mark Pronk, Pascal Lexmond, Corien Swaan, Manon Haverkate, Madelief Mollers, Mart Stein, Sandra Kengne Kamga Mobou, Jeroen van Kampen, Jolanda Voermans, Aura Timen, Corine GeurtsvanKessel, Annetiek van der Eijk, Richard Molenkamp, Marion Koopmans, on behalf of the Dutch national COVID-19 response team. |
| EPI_ISL_415461 | hCoV-19/Netherlands/Gelderland_1-2/2020 | Europe / Netherlands / Gelderland   | 2020-03-10 | Dutch COVID-19 response team                                                   | Erasmus Medical Center                                                         | David Nieuwenhuijse, Bas Oude Munnink, Reina Sikkema, Claudia Schapendonk, Irina Chestakova, Anne van der Linden, Mark Pronk, Pascal Lexmond, Corien Swaan, Manon Haverkate, Madelief Mollers, Mart Stein, Sandra Kengne Kamga Mobou, Jeroen van Kampen, Jolanda Voermans, Aura Timen, Corine GeurtsvanKessel, Annetiek van der Eijk, Richard Molenkamp, Marion Koopmans, on behalf of the Dutch national COVID-19 response team. |

|                |                                       |                                   |            |                              |                        |                                                                                                                                                                                                                                                                                                                                                                                                                                   |
|----------------|---------------------------------------|-----------------------------------|------------|------------------------------|------------------------|-----------------------------------------------------------------------------------------------------------------------------------------------------------------------------------------------------------------------------------------------------------------------------------------------------------------------------------------------------------------------------------------------------------------------------------|
| EPI_ISL_415462 | hCoV-19/Netherlands/Gelderland_2/2020 | Europe / Netherlands / Gelderland | 2020-03-09 | Dutch COVID-19 response team | Erasmus Medical Center | David Nieuwenhuijse, Bas Oude Munnink, Reina Sikkema, Claudia Schapendonk, Irina Chestakova, Anne van der Linden, Mark Pronk, Pascal Lexmond, Corien Swaan, Manon Haverkate, Madelief Mollers, Mart Stein, Sandra Kengne Kamga Mobou, Jeroen van Kampen, Jolanda Voermans, Aura Timen, Corine GeurtsvanKessel, Annemiek van der Eijk, Richard Molenkamp, Marion Koopmans, on behalf of the Dutch national COVID-19 response team. |
| EPI_ISL_415463 | hCoV-19/Netherlands/Gelderland_3/2020 | Europe / Netherlands / Gelderland | 2020-03-09 | Dutch COVID-19 response team | Erasmus Medical Center | David Nieuwenhuijse, Bas Oude Munnink, Reina Sikkema, Claudia Schapendonk, Irina Chestakova, Anne van der Linden, Mark Pronk, Pascal Lexmond, Corien Swaan, Manon Haverkate, Madelief Mollers, Mart Stein, Sandra Kengne Kamga Mobou, Jeroen van Kampen, Jolanda Voermans, Aura Timen, Corine GeurtsvanKessel, Annemiek van der Eijk, Richard Molenkamp, Marion Koopmans, on behalf of the Dutch national COVID-19 response team. |
| EPI_ISL_415464 | hCoV-19/Netherlands/Limburg_7/2020    | Europe / Netherlands / Limburg    | 2020       | Dutch COVID-19 response team | Erasmus Medical Center | David Nieuwenhuijse, Bas Oude Munnink, Reina Sikkema, Claudia Schapendonk, Irina Chestakova, Anne van der Linden, Mark Pronk, Pascal Lexmond, Corien Swaan, Manon Haverkate, Madelief Mollers, Mart Stein, Sandra Kengne Kamga Mobou, Jeroen van Kampen, Jolanda Voermans, Aura Timen, Corine GeurtsvanKessel, Annemiek van der Eijk, Richard Molenkamp, Marion Koopmans, on behalf of the Dutch national COVID-19 response team. |
| EPI_ISL_415465 | hCoV-19/Netherlands/NA_1/2020         | Europe / Netherlands              | 2020-03-10 | Dutch COVID-19 response team | Erasmus Medical Center | David Nieuwenhuijse, Bas Oude Munnink, Reina Sikkema, Claudia Schapendonk, Irina Chestakova, Anne van der Linden, Mark Pronk, Pascal Lexmond, Corien Swaan, Manon Haverkate, Madelief Mollers, Mart Stein, Sandra Kengne Kamga Mobou, Jeroen van Kampen, Jolanda Voermans, Aura Timen, Corine GeurtsvanKessel, Annemiek van der Eijk, Richard Molenkamp, Marion Koopmans, on behalf of the Dutch national COVID-19 response team. |
| EPI_ISL_415466 | hCoV-19/Netherlands/NA_10/2020        | Europe / Netherlands              | 2020-03-09 | Dutch COVID-19 response team | Erasmus Medical Center | David Nieuwenhuijse, Bas Oude Munnink, Reina Sikkema, Claudia Schapendonk, Irina Chestakova, Anne van der Linden, Mark Pronk, Pascal Lexmond, Corien Swaan, Manon Haverkate, Madelief Mollers, Mart Stein, Sandra Kengne Kamga Mobou, Jeroen van Kampen, Jolanda Voermans, Aura Timen, Corine GeurtsvanKessel, Annemiek van der Eijk, Richard Molenkamp, Marion Koopmans, on behalf of the Dutch national COVID-19 response team. |
| EPI_ISL_415467 | hCoV-19/Netherlands/NA_11/2020        | Europe / Netherlands              | 2020-03-10 | Dutch COVID-19 response team | Erasmus Medical Center | David Nieuwenhuijse, Bas Oude Munnink, Reina Sikkema, Claudia Schapendonk, Irina Chestakova, Anne van der Linden, Mark Pronk, Pascal Lexmond, Corien Swaan, Manon Haverkate, Madelief Mollers, Mart Stein, Sandra Kengne Kamga Mobou, Jeroen van Kampen, Jolanda Voermans, Aura Timen, Corine GeurtsvanKessel, Annemiek van der Eijk, Richard Molenkamp, Marion Koopmans, on behalf of the Dutch national COVID-19 response team. |
| EPI_ISL_415468 | hCoV-19/Netherlands/NA_12/2020        | Europe / Netherlands              | 2020-03-10 | Dutch COVID-19 response team | Erasmus Medical Center | David Nieuwenhuijse, Bas Oude Munnink, Reina Sikkema, Claudia Schapendonk, Irina Chestakova, Anne van der Linden, Mark Pronk, Pascal Lexmond, Corien Swaan, Manon Haverkate, Madelief Mollers, Mart Stein, Sandra Kengne Kamga Mobou, Jeroen van Kampen, Jolanda Voermans, Aura Timen, Corine GeurtsvanKessel, Annemiek van der Eijk, Richard Molenkamp, Marion Koopmans, on behalf of the Dutch national COVID-19 response team. |
| EPI_ISL_415469 | hCoV-19/Netherlands/NA_13/2020        | Europe / Netherlands              | 2020-03-10 | Dutch COVID-19 response team | Erasmus Medical Center | David Nieuwenhuijse, Bas Oude Munnink, Reina Sikkema, Claudia Schapendonk, Irina Chestakova, Anne van der Linden, Mark Pronk, Pascal Lexmond, Corien Swaan, Manon Haverkate, Madelief Mollers, Mart Stein, Sandra Kengne Kamga Mobou, Jeroen van Kampen, Jolanda Voermans, Aura Timen, Corine GeurtsvanKessel, Annemiek van der Eijk, Richard Molenkamp, Marion Koopmans, on behalf of the Dutch national COVID-19 response team. |
| EPI_ISL_415470 | hCoV-19/Netherlands/NA_14/2020        | Europe / Netherlands              | 2020-03-10 | Dutch COVID-19 response team | Erasmus Medical Center | David Nieuwenhuijse, Bas Oude Munnink, Reina Sikkema, Claudia Schapendonk, Irina Chestakova, Anne van der Linden, Mark Pronk, Pascal Lexmond, Corien Swaan, Manon Haverkate, Madelief Mollers, Mart Stein, Sandra Kengne Kamga Mobou, Jeroen van Kampen, Jolanda Voermans, Aura Timen, Corine GeurtsvanKessel, Annemiek van der Eijk, Richard Molenkamp, Marion Koopmans, on behalf of the Dutch national COVID-19 response team. |
| EPI_ISL_415471 | hCoV-19/Netherlands/NA_15/2020        | Europe / Netherlands              | 2020-03-11 | Dutch COVID-19 response team | Erasmus Medical Center | David Nieuwenhuijse, Bas Oude Munnink, Reina Sikkema, Claudia Schapendonk, Irina Chestakova, Anne van der Linden, Mark Pronk, Pascal Lexmond, Corien Swaan, Manon Haverkate, Madelief Mollers, Mart Stein, Sandra Kengne Kamga Mobou, Jeroen van Kampen, Jolanda Voermans, Aura Timen, Corine GeurtsvanKessel, Annemiek van der Eijk, Richard Molenkamp, Marion Koopmans, on behalf of the Dutch national COVID-19 response team. |





|                |                                          |                                                 |            |                              |                        |                                                                                                                                                                                                                                                                                                                                                                                                                                   |
|----------------|------------------------------------------|-------------------------------------------------|------------|------------------------------|------------------------|-----------------------------------------------------------------------------------------------------------------------------------------------------------------------------------------------------------------------------------------------------------------------------------------------------------------------------------------------------------------------------------------------------------------------------------|
| EPI_ISL_415492 | hCoV-19/Netherlands/NA_35/2020           | Europe / Netherlands                            | 2020-03-10 | Dutch COVID-19 response team | Erasmus Medical Center | David Nieuwenhuijse, Bas Oude Munnink, Reina Sikkema, Claudia Schapendonk, Irina Chestakova, Anne van der Linden, Mark Pronk, Pascal Lexmond, Corien Swaan, Manon Haverkate, Madelief Mollers, Mart Stein, Sandra Kengne Kamga Mobou, Jeroen van Kampen, Jolanda Voermans, Aura Timen, Corine GeurtsvanKessel, Annemiek van der Eijk, Richard Molenkamp, Marion Koopmans, on behalf of the Dutch national COVID-19 response team. |
| EPI_ISL_415493 | hCoV-19/Netherlands/NA_4/2020            | Europe / Netherlands                            | 2020       | Dutch COVID-19 response team | Erasmus Medical Center | David Nieuwenhuijse, Bas Oude Munnink, Reina Sikkema, Claudia Schapendonk, Irina Chestakova, Anne van der Linden, Mark Pronk, Pascal Lexmond, Corien Swaan, Manon Haverkate, Madelief Mollers, Mart Stein, Sandra Kengne Kamga Mobou, Jeroen van Kampen, Jolanda Voermans, Aura Timen, Corine GeurtsvanKessel, Annemiek van der Eijk, Richard Molenkamp, Marion Koopmans, on behalf of the Dutch national COVID-19 response team. |
| EPI_ISL_415494 | hCoV-19/Netherlands/NA_5/2020            | Europe / Netherlands                            | 2020       | Dutch COVID-19 response team | Erasmus Medical Center | David Nieuwenhuijse, Bas Oude Munnink, Reina Sikkema, Claudia Schapendonk, Irina Chestakova, Anne van der Linden, Mark Pronk, Pascal Lexmond, Corien Swaan, Manon Haverkate, Madelief Mollers, Mart Stein, Sandra Kengne Kamga Mobou, Jeroen van Kampen, Jolanda Voermans, Aura Timen, Corine GeurtsvanKessel, Annemiek van der Eijk, Richard Molenkamp, Marion Koopmans, on behalf of the Dutch national COVID-19 response team. |
| EPI_ISL_415495 | hCoV-19/Netherlands/NA_6/2020            | Europe / Netherlands                            | 2020-03-10 | Dutch COVID-19 response team | Erasmus Medical Center | David Nieuwenhuijse, Bas Oude Munnink, Reina Sikkema, Claudia Schapendonk, Irina Chestakova, Anne van der Linden, Mark Pronk, Pascal Lexmond, Corien Swaan, Manon Haverkate, Madelief Mollers, Mart Stein, Sandra Kengne Kamga Mobou, Jeroen van Kampen, Jolanda Voermans, Aura Timen, Corine GeurtsvanKessel, Annemiek van der Eijk, Richard Molenkamp, Marion Koopmans, on behalf of the Dutch national COVID-19 response team. |
| EPI_ISL_415496 | hCoV-19/Netherlands/NA_7/2020            | Europe / Netherlands                            | 2020-03-09 | Dutch COVID-19 response team | Erasmus Medical Center | David Nieuwenhuijse, Bas Oude Munnink, Reina Sikkema, Claudia Schapendonk, Irina Chestakova, Anne van der Linden, Mark Pronk, Pascal Lexmond, Corien Swaan, Manon Haverkate, Madelief Mollers, Mart Stein, Sandra Kengne Kamga Mobou, Jeroen van Kampen, Jolanda Voermans, Aura Timen, Corine GeurtsvanKessel, Annemiek van der Eijk, Richard Molenkamp, Marion Koopmans, on behalf of the Dutch national COVID-19 response team. |
| EPI_ISL_415497 | hCoV-19/Netherlands/NA_8/2020            | Europe / Netherlands                            | 2020-03-09 | Dutch COVID-19 response team | Erasmus Medical Center | David Nieuwenhuijse, Bas Oude Munnink, Reina Sikkema, Claudia Schapendonk, Irina Chestakova, Anne van der Linden, Mark Pronk, Pascal Lexmond, Corien Swaan, Manon Haverkate, Madelief Mollers, Mart Stein, Sandra Kengne Kamga Mobou, Jeroen van Kampen, Jolanda Voermans, Aura Timen, Corine GeurtsvanKessel, Annemiek van der Eijk, Richard Molenkamp, Marion Koopmans, on behalf of the Dutch national COVID-19 response team. |
| EPI_ISL_415498 | hCoV-19/Netherlands/NA_9/2020            | Europe / Netherlands                            | 2020-03-09 | Dutch COVID-19 response team | Erasmus Medical Center | David Nieuwenhuijse, Bas Oude Munnink, Reina Sikkema, Claudia Schapendonk, Irina Chestakova, Anne van der Linden, Mark Pronk, Pascal Lexmond, Corien Swaan, Manon Haverkate, Madelief Mollers, Mart Stein, Sandra Kengne Kamga Mobou, Jeroen van Kampen, Jolanda Voermans, Aura Timen, Corine GeurtsvanKessel, Annemiek van der Eijk, Richard Molenkamp, Marion Koopmans, on behalf of the Dutch national COVID-19 response team. |
| EPI_ISL_415499 | hCoV-19/Netherlands/NoordBrabant_41/2020 | Europe / Netherlands / Noord Brabant 2020       |            | Dutch COVID-19 response team | Erasmus Medical Center | David Nieuwenhuijse, Bas Oude Munnink, Reina Sikkema, Claudia Schapendonk, Irina Chestakova, Anne van der Linden, Mark Pronk, Pascal Lexmond, Corien Swaan, Manon Haverkate, Madelief Mollers, Mart Stein, Sandra Kengne Kamga Mobou, Jeroen van Kampen, Jolanda Voermans, Aura Timen, Corine GeurtsvanKessel, Annemiek van der Eijk, Richard Molenkamp, Marion Koopmans, on behalf of the Dutch national COVID-19 response team. |
| EPI_ISL_415500 | hCoV-19/Netherlands/NoordBrabant_42/2020 | Europe / Netherlands / Noord Brabant 2020-03-10 |            | Dutch COVID-19 response team | Erasmus Medical Center | David Nieuwenhuijse, Bas Oude Munnink, Reina Sikkema, Claudia Schapendonk, Irina Chestakova, Anne van der Linden, Mark Pronk, Pascal Lexmond, Corien Swaan, Manon Haverkate, Madelief Mollers, Mart Stein, Sandra Kengne Kamga Mobou, Jeroen van Kampen, Jolanda Voermans, Aura Timen, Corine GeurtsvanKessel, Annemiek van der Eijk, Richard Molenkamp, Marion Koopmans, on behalf of the Dutch national COVID-19 response team. |
| EPI_ISL_415501 | hCoV-19/Netherlands/NoordBrabant_44/2020 | Europe / Netherlands / Noord Brabant 2020-03-11 |            | Dutch COVID-19 response team | Erasmus Medical Center | David Nieuwenhuijse, Bas Oude Munnink, Reina Sikkema, Claudia Schapendonk, Irina Chestakova, Anne van der Linden, Mark Pronk, Pascal Lexmond, Corien Swaan, Manon Haverkate, Madelief Mollers, Mart Stein, Sandra Kengne Kamga Mobou, Jeroen van Kampen, Jolanda Voermans, Aura Timen, Corine GeurtsvanKessel, Annemiek van der Eijk, Richard Molenkamp, Marion Koopmans, on behalf of the Dutch national COVID-19 response team. |







|                |                                          |                                      |            |                              |                        |                                                                                                                                                                                                                                                                                                                                                                                                                                   |
|----------------|------------------------------------------|--------------------------------------|------------|------------------------------|------------------------|-----------------------------------------------------------------------------------------------------------------------------------------------------------------------------------------------------------------------------------------------------------------------------------------------------------------------------------------------------------------------------------------------------------------------------------|
| EPI_ISL_415522 | hCoV-19/Netherlands/NoordBrabant_66/2020 | Europe / Netherlands / Noord Brabant | 2020-03-12 | Dutch COVID-19 response team | Erasmus Medical Center | David Nieuwenhuijse, Bas Oude Munnink, Reina Sikkema, Claudia Schapendonk, Irina Chestakova, Anne van der Linden, Mark Pronk, Pascal Lexmond, Corien Swaan, Manon Haverkate, Madelief Mollers, Mart Stein, Sandra Kengne Kamga Mobou, Jeroen van Kampen, Jolanda Voermans, Aura Timen, Corine GeurtsvanKessel, Annemiek van der Eijk, Richard Molenkamp, Marion Koopmans, on behalf of the Dutch national COVID-19 response team. |
| EPI_ISL_415523 | hCoV-19/Netherlands/NoordBrabant_67/2020 | Europe / Netherlands / Noord Brabant | 2020-03-12 | Dutch COVID-19 response team | Erasmus Medical Center | David Nieuwenhuijse, Bas Oude Munnink, Reina Sikkema, Claudia Schapendonk, Irina Chestakova, Anne van der Linden, Mark Pronk, Pascal Lexmond, Corien Swaan, Manon Haverkate, Madelief Mollers, Mart Stein, Sandra Kengne Kamga Mobou, Jeroen van Kampen, Jolanda Voermans, Aura Timen, Corine GeurtsvanKessel, Annemiek van der Eijk, Richard Molenkamp, Marion Koopmans, on behalf of the Dutch national COVID-19 response team. |
| EPI_ISL_415524 | hCoV-19/Netherlands/NoordBrabant_68/2020 | Europe / Netherlands / Noord Brabant | 2020-03-12 | Dutch COVID-19 response team | Erasmus Medical Center | David Nieuwenhuijse, Bas Oude Munnink, Reina Sikkema, Claudia Schapendonk, Irina Chestakova, Anne van der Linden, Mark Pronk, Pascal Lexmond, Corien Swaan, Manon Haverkate, Madelief Mollers, Mart Stein, Sandra Kengne Kamga Mobou, Jeroen van Kampen, Jolanda Voermans, Aura Timen, Corine GeurtsvanKessel, Annemiek van der Eijk, Richard Molenkamp, Marion Koopmans, on behalf of the Dutch national COVID-19 response team. |
| EPI_ISL_415525 | hCoV-19/Netherlands/NoordHolland_3/2020  | Europe / Netherlands / Noord Holland | 2020-03-12 | Dutch COVID-19 response team | Erasmus Medical Center | David Nieuwenhuijse, Bas Oude Munnink, Reina Sikkema, Claudia Schapendonk, Irina Chestakova, Anne van der Linden, Mark Pronk, Pascal Lexmond, Corien Swaan, Manon Haverkate, Madelief Mollers, Mart Stein, Sandra Kengne Kamga Mobou, Jeroen van Kampen, Jolanda Voermans, Aura Timen, Corine GeurtsvanKessel, Annemiek van der Eijk, Richard Molenkamp, Marion Koopmans, on behalf of the Dutch national COVID-19 response team. |
| EPI_ISL_415526 | hCoV-19/Netherlands/Utrecht_17/2020      | Europe / Netherlands / Utrecht       | 2020-03-10 | Dutch COVID-19 response team | Erasmus Medical Center | David Nieuwenhuijse, Bas Oude Munnink, Reina Sikkema, Claudia Schapendonk, Irina Chestakova, Anne van der Linden, Mark Pronk, Pascal Lexmond, Corien Swaan, Manon Haverkate, Madelief Mollers, Mart Stein, Sandra Kengne Kamga Mobou, Jeroen van Kampen, Jolanda Voermans, Aura Timen, Corine GeurtsvanKessel, Annemiek van der Eijk, Richard Molenkamp, Marion Koopmans, on behalf of the Dutch national COVID-19 response team. |
| EPI_ISL_415527 | hCoV-19/Netherlands/Utrecht_18/2020      | Europe / Netherlands / Utrecht       | 2020-03-12 | Dutch COVID-19 response team | Erasmus Medical Center | David Nieuwenhuijse, Bas Oude Munnink, Reina Sikkema, Claudia Schapendonk, Irina Chestakova, Anne van der Linden, Mark Pronk, Pascal Lexmond, Corien Swaan, Manon Haverkate, Madelief Mollers, Mart Stein, Sandra Kengne Kamga Mobou, Jeroen van Kampen, Jolanda Voermans, Aura Timen, Corine GeurtsvanKessel, Annemiek van der Eijk, Richard Molenkamp, Marion Koopmans, on behalf of the Dutch national COVID-19 response team. |
| EPI_ISL_415528 | hCoV-19/Netherlands/Utrecht_19/2020      | Europe / Netherlands / Utrecht       | 2020-03-12 | Dutch COVID-19 response team | Erasmus Medical Center | David Nieuwenhuijse, Bas Oude Munnink, Reina Sikkema, Claudia Schapendonk, Irina Chestakova, Anne van der Linden, Mark Pronk, Pascal Lexmond, Corien Swaan, Manon Haverkate, Madelief Mollers, Mart Stein, Sandra Kengne Kamga Mobou, Jeroen van Kampen, Jolanda Voermans, Aura Timen, Corine GeurtsvanKessel, Annemiek van der Eijk, Richard Molenkamp, Marion Koopmans, on behalf of the Dutch national COVID-19 response team. |
| EPI_ISL_415529 | hCoV-19/Netherlands/ZuidHolland_25/2020  | Europe / Netherlands / Zuid Holland  | 2020-03-09 | Dutch COVID-19 response team | Erasmus Medical Center | David Nieuwenhuijse, Bas Oude Munnink, Reina Sikkema, Claudia Schapendonk, Irina Chestakova, Anne van der Linden, Mark Pronk, Pascal Lexmond, Corien Swaan, Manon Haverkate, Madelief Mollers, Mart Stein, Sandra Kengne Kamga Mobou, Jeroen van Kampen, Jolanda Voermans, Aura Timen, Corine GeurtsvanKessel, Annemiek van der Eijk, Richard Molenkamp, Marion Koopmans, on behalf of the Dutch national COVID-19 response team. |
| EPI_ISL_415530 | hCoV-19/Netherlands/ZuidHolland_26/2020  | Europe / Netherlands / Zuid Holland  | 2020-03-09 | Dutch COVID-19 response team | Erasmus Medical Center | David Nieuwenhuijse, Bas Oude Munnink, Reina Sikkema, Claudia Schapendonk, Irina Chestakova, Anne van der Linden, Mark Pronk, Pascal Lexmond, Corien Swaan, Manon Haverkate, Madelief Mollers, Mart Stein, Sandra Kengne Kamga Mobou, Jeroen van Kampen, Jolanda Voermans, Aura Timen, Corine GeurtsvanKessel, Annemiek van der Eijk, Richard Molenkamp, Marion Koopmans, on behalf of the Dutch national COVID-19 response team. |
| EPI_ISL_415531 | hCoV-19/Netherlands/ZuidHolland_27/2020  | Europe / Netherlands / Zuid Holland  | 2020-03-09 | Dutch COVID-19 response team | Erasmus Medical Center | David Nieuwenhuijse, Bas Oude Munnink, Reina Sikkema, Claudia Schapendonk, Irina Chestakova, Anne van der Linden, Mark Pronk, Pascal Lexmond, Corien Swaan, Manon Haverkate, Madelief Mollers, Mart Stein, Sandra Kengne Kamga Mobou, Jeroen van Kampen, Jolanda Voermans, Aura Timen, Corine GeurtsvanKessel, Annemiek van der Eijk, Richard Molenkamp, Marion Koopmans, on behalf of the Dutch national COVID-19 response team. |

|                |                                         |                                       |            |                                  |                                          |                                                                                                                                                                                                                                                                                                                                                                                                                                   |
|----------------|-----------------------------------------|---------------------------------------|------------|----------------------------------|------------------------------------------|-----------------------------------------------------------------------------------------------------------------------------------------------------------------------------------------------------------------------------------------------------------------------------------------------------------------------------------------------------------------------------------------------------------------------------------|
| EPI_ISL_415532 | hCoV-19/Netherlands/ZuidHolland_28/2020 | Europe / Netherlands / Zuid Holland   | 2020-03-09 | Dutch COVID-19 response team     | Erasmus Medical Center                   | David Nieuwenhuijse, Bas Oude Munnink, Reina Sikkema, Claudia Schapendonk, Irina Chestakova, Anne van der Linden, Mark Pronk, Pascal Lexmond, Corien Swaan, Manon Haverkate, Madelief Mollers, Mart Stein, Sandra Kengne Kamga Mobou, Jeroen van Kampen, Jolanda Voermans, Aura Timen, Corine GeurtsvanKessel, Annemiek van der Eijk, Richard Molenkamp, Marion Koopmans, on behalf of the Dutch national COVID-19 response team. |
| EPI_ISL_415533 | hCoV-19/Netherlands/ZuidHolland_29/2020 | Europe / Netherlands / Zuid Holland   | 2020-03-09 | Dutch COVID-19 response team     | Erasmus Medical Center                   | David Nieuwenhuijse, Bas Oude Munnink, Reina Sikkema, Claudia Schapendonk, Irina Chestakova, Anne van der Linden, Mark Pronk, Pascal Lexmond, Corien Swaan, Manon Haverkate, Madelief Mollers, Mart Stein, Sandra Kengne Kamga Mobou, Jeroen van Kampen, Jolanda Voermans, Aura Timen, Corine GeurtsvanKessel, Annemiek van der Eijk, Richard Molenkamp, Marion Koopmans, on behalf of the Dutch national COVID-19 response team. |
| EPI_ISL_415534 | hCoV-19/Netherlands/ZuidHolland_30/2020 | Europe / Netherlands / Zuid Holland   | 2020-03-11 | Dutch COVID-19 response team     | Erasmus Medical Center                   | David Nieuwenhuijse, Bas Oude Munnink, Reina Sikkema, Claudia Schapendonk, Irina Chestakova, Anne van der Linden, Mark Pronk, Pascal Lexmond, Corien Swaan, Manon Haverkate, Madelief Mollers, Mart Stein, Sandra Kengne Kamga Mobou, Jeroen van Kampen, Jolanda Voermans, Aura Timen, Corine GeurtsvanKessel, Annemiek van der Eijk, Richard Molenkamp, Marion Koopmans, on behalf of the Dutch national COVID-19 response team. |
| EPI_ISL_415535 | hCoV-19/Netherlands/ZuidHolland_31/2020 | Europe / Netherlands / Zuid Holland   | 2020-03-12 | Dutch COVID-19 response team     | Erasmus Medical Center                   | David Nieuwenhuijse, Bas Oude Munnink, Reina Sikkema, Claudia Schapendonk, Irina Chestakova, Anne van der Linden, Mark Pronk, Pascal Lexmond, Corien Swaan, Manon Haverkate, Madelief Mollers, Mart Stein, Sandra Kengne Kamga Mobou, Jeroen van Kampen, Jolanda Voermans, Aura Timen, Corine GeurtsvanKessel, Annemiek van der Eijk, Richard Molenkamp, Marion Koopmans, on behalf of the Dutch national COVID-19 response team. |
| EPI_ISL_415536 | hCoV-19/Wales/PHW12/2020                | Europe / United Kingdom / Wales       | 2020-03-10 | Wales Specialist Virology Centre | Public Health Wales Microbiology Cardiff | Catherine Moore, Joanne Watkins, Sally Corden, Tom Connor                                                                                                                                                                                                                                                                                                                                                                         |
| EPI_ISL_415537 | hCoV-19/Wales/PHW13/2020                | Europe / United Kingdom / Wales       | 2020-03-08 | Wales Specialist Virology Centre | Public Health Wales Microbiology Cardiff | Catherine Moore, Joanne Watkins, Sally Corden, Tom Connor                                                                                                                                                                                                                                                                                                                                                                         |
| EPI_ISL_415538 | hCoV-19/Wales/PHW38/2020                | Europe / United Kingdom / Wales       | 2020-03-12 | Wales Specialist Virology Centre | Public Health Wales Microbiology Cardiff | Catherine Moore, Joanne Watkins, Sally Corden, Tom Connor                                                                                                                                                                                                                                                                                                                                                                         |
| EPI_ISL_415539 | hCoV-19/USA/UT-01/2020                  | North America / USA / Utah            | 2020-03-13 | Utah Public Health Laboratory    | Utah Public Health Laboratory            | Erin Young, Kelly Oakeson                                                                                                                                                                                                                                                                                                                                                                                                         |
| EPI_ISL_415541 | hCoV-19/USA/UT-03/2020                  | North America / USA / Utah            | 2020-03-13 | Utah Public Health Laboratory    | Utah Public Health Laboratory            | Erin Young, Kelly Oakeson                                                                                                                                                                                                                                                                                                                                                                                                         |
| EPI_ISL_415542 | hCoV-19/USA/UT-04/2020                  | North America / USA / Utah            | 2020-03-13 | Utah Public Health Laboratory    | Utah Public Health Laboratory            | Erin Young, Kelly Oakeson                                                                                                                                                                                                                                                                                                                                                                                                         |
| EPI_ISL_415543 | hCoV-19/USA/UT-05/2020                  | North America / USA / Utah            | 2020-03-13 | Utah Public Health Laboratory    | Utah Public Health Laboratory            | Erin Young, Kelly Oakeson                                                                                                                                                                                                                                                                                                                                                                                                         |
| EPI_ISL_415544 | hCoV-19/USA/UT-06/2020                  | North America / USA / Utah            | 2020-03-13 | Utah Public Health Laboratory    | Utah Public Health Laboratory            | Erin Young, Kelly Oakeson                                                                                                                                                                                                                                                                                                                                                                                                         |
| EPI_ISL_415577 | hCoV-19/Canada/BC_69243/2020            | North America / Canada / British Colu | 2020-02-20 | BCCDC Public Health Laboratory   | BCCDC Public Health Laboratory           | Harrigan, Prystajecy, Krajden, Lee, Kamelian, Lapointe, Choi, Hoang, Sekirov, Levett, Tyson, Snutch, Loman, Quick, Li, Gilmour                                                                                                                                                                                                                                                                                                    |
| EPI_ISL_415578 | hCoV-19/Canada/BC_13297/2020            | North America / Canada / British Colu | 2020-02-27 | BCCDC Public Health Laboratory   | BCCDC Public Health Laboratory           | Harrigan, Prystajecy, Krajden, Lee, Kamelian, Lapointe, Choi, Hoang, Sekirov, Levett, Tyson, Snutch, Loman, Quick, Li, Gilmour                                                                                                                                                                                                                                                                                                    |
| EPI_ISL_415579 | hCoV-19/Canada/BC_25211/2020            | North America / Canada / British Colu | 2020-03-02 | BCCDC Public Health Laboratory   | BCCDC Public Health Laboratory           | Harrigan, Prystajecy, Krajden, Lee, Kamelian, Lapointe, Choi, Hoang, Sekirov, Levett, Tyson, Snutch, Loman, Quick, Li, Gilmour                                                                                                                                                                                                                                                                                                    |
| EPI_ISL_415580 | hCoV-19/Canada/BC_17397/2020            | North America / Canada / British Colu | 2020-02-28 | BCCDC Public Health Laboratory   | BCCDC Public Health Laboratory           | Harrigan, Prystajecy, Krajden, Lee, Kamelian, Lapointe, Choi, Hoang, Sekirov, Levett, Tyson, Snutch, Loman, Quick, Li, Gilmour                                                                                                                                                                                                                                                                                                    |
| EPI_ISL_415581 | hCoV-19/Canada/BC_02421/2020            | North America / Canada / British Colu | 2020-03-01 | BCCDC Public Health Laboratory   | BCCDC Public Health Laboratory           | Harrigan, Prystajecy, Krajden, Lee, Kamelian, Lapointe, Choi, Hoang, Sekirov, Levett, Tyson, Snutch, Loman, Quick, Li, Gilmour                                                                                                                                                                                                                                                                                                    |
| EPI_ISL_415582 | hCoV-19/Canada/BC_35720/2020            | North America / Canada / British Colu | 2020-03-04 | BCCDC Public Health Laboratory   | BCCDC Public Health Laboratory           | Harrigan, Prystajecy, Krajden, Lee, Kamelian, Lapointe, Choi, Hoang, Sekirov, Levett, Tyson, Snutch, Loman, Quick, Li, Gilmour                                                                                                                                                                                                                                                                                                    |
| EPI_ISL_415583 | hCoV-19/Canada/BC_40860/2020            | North America / Canada / British Colu | 2020-03-03 | BCCDC Public Health Laboratory   | BCCDC Public Health Laboratory           | Harrigan, Prystajecy, Krajden, Lee, Kamelian, Lapointe, Choi, Hoang, Sekirov, Levett, Tyson, Snutch, Loman, Quick, Li, Gilmour                                                                                                                                                                                                                                                                                                    |
| EPI_ISL_415584 | hCoV-19/Canada/BC_41851/2020            | North America / Canada / British Colu | 2020-03-02 | BCCDC Public Health Laboratory   | BCCDC Public Health Laboratory           | Harrigan, Prystajecy, Krajden, Lee, Kamelian, Lapointe, Choi, Hoang, Sekirov, Levett, Tyson, Snutch, Loman, Quick, Li, Gilmour                                                                                                                                                                                                                                                                                                    |
| EPI_ISL_415585 | hCoV-19/Canada/BC_65034/2020            | North America / Canada / British Colu | 2020-03-04 | BCCDC Public Health Laboratory   | BCCDC Public Health Laboratory           | Harrigan, Prystajecy, Krajden, Lee, Kamelian, Lapointe, Choi, Hoang, Sekirov, Levett, Tyson, Snutch, Loman, Quick, Li, Gilmour                                                                                                                                                                                                                                                                                                    |
| EPI_ISL_415586 | hCoV-19/Canada/BC_64686/2020            | North America / Canada / British Colu | 2020-03-05 | BCCDC Public Health Laboratory   | BCCDC Public Health Laboratory           | Harrigan, Prystajecy, Krajden, Lee, Kamelian, Lapointe, Choi, Hoang, Sekirov, Levett, Tyson, Snutch, Loman, Quick, Li, Gilmour                                                                                                                                                                                                                                                                                                    |
| EPI_ISL_415587 | hCoV-19/Canada/BC_66353/2020            | North America / Canada / British Colu | 2020-03-04 | BCCDC Public Health Laboratory   | BCCDC Public Health Laboratory           | Harrigan, Prystajecy, Krajden, Lee, Kamelian, Lapointe, Choi, Hoang, Sekirov, Levett, Tyson, Snutch, Loman, Quick, Li, Gilmour                                                                                                                                                                                                                                                                                                    |
| EPI_ISL_415588 | hCoV-19/Canada/BC_83109/2020            | North America / Canada / British Colu | 2020-03-05 | BCCDC Public Health Laboratory   | BCCDC Public Health Laboratory           | Harrigan, Prystajecy, Krajden, Lee, Kamelian, Lapointe, Choi, Hoang, Sekirov, Levett, Tyson, Snutch, Loman, Quick, Li, Gilmour                                                                                                                                                                                                                                                                                                    |
| EPI_ISL_415589 | hCoV-19/Canada/BC_83163/2020            | North America / Canada / British Colu | 2020-03-05 | BCCDC Public Health Laboratory   | BCCDC Public Health Laboratory           | Harrigan, Prystajecy, Krajden, Lee, Kamelian, Lapointe, Choi, Hoang, Sekirov, Levett, Tyson, Snutch, Loman, Quick, Li, Gilmour                                                                                                                                                                                                                                                                                                    |
| EPI_ISL_415590 | hCoV-19/Canada/BC_78548/2020            | North America / Canada / British Colu | 2020-03-05 | BCCDC Public Health Laboratory   | BCCDC Public Health Laboratory           | Harrigan, Prystajecy, Krajden, Lee, Kamelian, Lapointe, Choi, Hoang, Sekirov, Levett, Tyson, Snutch, Loman, Quick, Li, Gilmour                                                                                                                                                                                                                                                                                                    |
| EPI_ISL_415591 | hCoV-19/USA/WA-UW63/2020                | North America / USA / Washington      | 2020-03-10 | UW Virology Lab                  | UW Virology Lab                          | Pavitra Roychoudhury, Hong Xie, Keith Jerome, Alexander Greninger                                                                                                                                                                                                                                                                                                                                                                 |
| EPI_ISL_415592 | hCoV-19/USA/WA-UW64/2020                | North America / USA / Washington      | 2020-03-09 | UW Virology Lab                  | UW Virology Lab                          | Pavitra Roychoudhury, Hong Xie, Keith Jerome, Alexander Greninger                                                                                                                                                                                                                                                                                                                                                                 |
| EPI_ISL_415593 | hCoV-19/USA/WA-UW65/2020                | North America / USA / Washington      | 2020-03-10 | UW Virology Lab                  | UW Virology Lab                          | Pavitra Roychoudhury, Hong Xie, Keith Jerome, Alexander Greninger                                                                                                                                                                                                                                                                                                                                                                 |
| EPI_ISL_415594 | hCoV-19/USA/WA-UW66/2020                | North America / USA / Washington      | 2020-03-10 | UW Virology Lab                  | UW Virology Lab                          | Pavitra Roychoudhury, Hong Xie, Keith Jerome, Alexander Greninger                                                                                                                                                                                                                                                                                                                                                                 |
| EPI_ISL_415595 | hCoV-19/USA/WA-UW67/2020                | North America / USA / Washington      | 2020-03-09 | UW Virology Lab                  | UW Virology Lab                          | Pavitra Roychoudhury, Hong Xie, Keith Jerome, Alexander Greninger                                                                                                                                                                                                                                                                                                                                                                 |
| EPI_ISL_415596 | hCoV-19/USA/WA-UW68/2020                | North America / USA / Washington      | 2020-03-09 | UW Virology Lab                  | UW Virology Lab                          | Pavitra Roychoudhury, Hong Xie, Keith Jerome, Alexander Greninger                                                                                                                                                                                                                                                                                                                                                                 |
| EPI_ISL_415597 | hCoV-19/USA/WA-UW69/2020                | North America / USA / Washington      | 2020-03-10 | UW Virology Lab                  | UW Virology Lab                          | Pavitra Roychoudhury, Hong Xie, Keith Jerome, Alexander Greninger                                                                                                                                                                                                                                                                                                                                                                 |
| EPI_ISL_415598 | hCoV-19/USA/WA-UW70/2020                | North America / USA / Washington      | 2020-03-10 | UW Virology Lab                  | UW Virology Lab                          | Pavitra Roychoudhury, Hong Xie, Keith Jerome, Alexander Greninger                                                                                                                                                                                                                                                                                                                                                                 |

|                |                              |                                    |            |                                                                                                                         |                                                                                                                         |                                                                                                                                                                                                                                                                                                                                                                                                                                                                                                                                                                                                                                       |
|----------------|------------------------------|------------------------------------|------------|-------------------------------------------------------------------------------------------------------------------------|-------------------------------------------------------------------------------------------------------------------------|---------------------------------------------------------------------------------------------------------------------------------------------------------------------------------------------------------------------------------------------------------------------------------------------------------------------------------------------------------------------------------------------------------------------------------------------------------------------------------------------------------------------------------------------------------------------------------------------------------------------------------------|
| EPI_ISL_415599 | hCoV-19/USA/WA-UW71/2020     | North America / USA / Washington   | 2020-03-09 | UW Virology Lab                                                                                                         | UW Virology Lab                                                                                                         | Pavitra Roychoudhury, Hong Xie, Keith Jerome, Alexander Greninger                                                                                                                                                                                                                                                                                                                                                                                                                                                                                                                                                                     |
| EPI_ISL_415626 | hCoV-19/USA/WA-UW61/2020     | North America / USA / Washington   | 2020-03-10 | UW Virology Lab                                                                                                         | UW Virology Lab                                                                                                         | Pavitra Roychoudhury, Hong Xie, Keith Jerome, Alexander Greninger                                                                                                                                                                                                                                                                                                                                                                                                                                                                                                                                                                     |
| EPI_ISL_415627 | hCoV-19/USA/WA-UW62/2020     | North America / USA / Washington   | 2020-03-09 | UW Virology Lab                                                                                                         | UW Virology Lab                                                                                                         | Pavitra Roychoudhury, Hong Xie, Keith Jerome, Alexander Greninger<br>Kathy Smollett, Daniel Mair, Stephen Carmichael, Ana da Silva Filipe; Richard Orton, David L Robertson; Alasdair MacLean, Rory Gunson; Natasha Jesudason, Kathy Li, Antonia Ho; Emma Thomson.                                                                                                                                                                                                                                                                                                                                                                    |
| EPI_ISL_415628 | hCoV-19/Scotland/CVR06/2020  | Europe / United Kingdom / Scotland | 2020-03-07 | West of Scotland Specialist Virology Centre, NHSGGC                                                                     | MRC-University of Glasgow Centre for Virus Research                                                                     |                                                                                                                                                                                                                                                                                                                                                                                                                                                                                                                                                                                                                                       |
| EPI_ISL_415629 | hCoV-19/Scotland/EDB004/2020 | Europe / United Kingdom / Scotland | 2020-03-04 | Virology Department, Royal Infirmary of Edinburgh, NHS Lothian                                                          | Virology Department, Royal Infirmary of Edinburgh, NHS Lothian                                                          | McHugh M, Dewar R, O'Toole Á, Rambaut A, Williams TC, Templeton K<br>Kathy Smollett, Daniel Mair, Stephen Carmichael, Ana da Silva Filipe; Richard Orton, David L Robertson; Alasdair MacLean, Rory Gunson; Natasha Jesudason, Kathy Li, Antonia Ho; Emma Thomson.                                                                                                                                                                                                                                                                                                                                                                    |
| EPI_ISL_415630 | hCoV-19/Scotland/CVR07/2020  | Europe / United Kingdom / Scotland | 2020-03-09 | West of Scotland Specialist Virology Centre, NHSGGC                                                                     | MRC-University of Glasgow Centre for Virus Research                                                                     |                                                                                                                                                                                                                                                                                                                                                                                                                                                                                                                                                                                                                                       |
| EPI_ISL_415631 | hCoV-19/Scotland/CVR10/2020  | Europe / United Kingdom / Scotland | 2020-03-10 | West of Scotland Specialist Virology Centre, NHSGGC                                                                     | MRC-University of Glasgow Centre for Virus Research                                                                     |                                                                                                                                                                                                                                                                                                                                                                                                                                                                                                                                                                                                                                       |
| EPI_ISL_415632 | hCoV-19/Scotland/EDB005/2020 | Europe / United Kingdom / Scotland | 2020-03-07 | Virology Department, Royal Infirmary of Edinburgh, NHS Lothian                                                          | Virology Department, Royal Infirmary of Edinburgh, NHS Lothian                                                          | McHugh M, Dewar R, O'Toole Á, Rambaut A, Williams TC, Templeton K                                                                                                                                                                                                                                                                                                                                                                                                                                                                                                                                                                     |
| EPI_ISL_415633 | hCoV-19/Scotland/EDB006/2020 | Europe / United Kingdom / Scotland | 2020-03-09 | Virology Department, Royal Infirmary of Edinburgh, NHS Lothian                                                          | Virology Department, Royal Infirmary of Edinburgh, NHS Lothian                                                          | McHugh M, Dewar R, O'Toole Á, Rambaut A, Williams TC, Templeton K                                                                                                                                                                                                                                                                                                                                                                                                                                                                                                                                                                     |
| EPI_ISL_415634 | hCoV-19/Scotland/EDB007/2020 | Europe / United Kingdom / Scotland | 2020-03-06 | Virology Department, Royal Infirmary of Edinburgh, NHS Lothian                                                          | Virology Department, Royal Infirmary of Edinburgh, NHS Lothian                                                          | McHugh M, Dewar R, O'Toole Á, Rambaut A, Williams TC, Templeton K                                                                                                                                                                                                                                                                                                                                                                                                                                                                                                                                                                     |
| EPI_ISL_415635 | hCoV-19/Scotland/EDB008/2020 | Europe / United Kingdom / Scotland | 2020-03-09 | Virology Department, Royal Infirmary of Edinburgh, NHS Lothian                                                          | Virology Department, Royal Infirmary of Edinburgh, NHS Lothian                                                          | McHugh M, Dewar R, O'Toole Á, Rambaut A, Williams TC, Templeton K                                                                                                                                                                                                                                                                                                                                                                                                                                                                                                                                                                     |
| EPI_ISL_415636 | hCoV-19/Scotland/EDB009/2020 | Europe / United Kingdom / Scotland | 2020-03-06 | Virology Department, Royal Infirmary of Edinburgh, NHS Lothian                                                          | Virology Department, Royal Infirmary of Edinburgh, NHS Lothian                                                          | McHugh M, Dewar R, O'Toole Á, Rambaut A, Williams TC, Templeton K                                                                                                                                                                                                                                                                                                                                                                                                                                                                                                                                                                     |
| EPI_ISL_415637 | hCoV-19/Scotland/EDB011/2020 | Europe / United Kingdom / Scotland | 2020-03-04 | Virology Department, Royal Infirmary of Edinburgh, NHS Lothian                                                          | Virology Department, Royal Infirmary of Edinburgh, NHS Lothian                                                          | McHugh M, Dewar R, O'Toole Á, Rambaut A, Williams TC, Templeton K                                                                                                                                                                                                                                                                                                                                                                                                                                                                                                                                                                     |
| EPI_ISL_415638 | hCoV-19/Scotland/EDB012/2020 | Europe / United Kingdom / Scotland | 2020-03-07 | Virology Department, Royal Infirmary of Edinburgh, NHS Lothian                                                          | Virology Department, Royal Infirmary of Edinburgh, NHS Lothian                                                          | McHugh M, Dewar R, O'Toole Á, Rambaut A, Williams TC, Templeton K                                                                                                                                                                                                                                                                                                                                                                                                                                                                                                                                                                     |
| EPI_ISL_415639 | hCoV-19/Scotland/EDB013/2020 | Europe / United Kingdom / Scotland | 2020-03-10 | Virology Department, Royal Infirmary of Edinburgh, NHS Lothian                                                          | Virology Department, Royal Infirmary of Edinburgh, NHS Lothian                                                          | McHugh M, Dewar R, O'Toole Á, Rambaut A, Williams TC, Templeton K                                                                                                                                                                                                                                                                                                                                                                                                                                                                                                                                                                     |
| EPI_ISL_415640 | hCoV-19/Scotland/EDB003/2020 | Europe / United Kingdom / Scotland | 2020-03-08 | Virology Department, Royal Infirmary of Edinburgh, NHS Lothian                                                          | Virology Department, Royal Infirmary of Edinburgh, NHS Lothian                                                          | McHugh M, Dewar R, O'Toole Á, Rambaut A, Williams TC, Templeton K<br>Nato Kotaria, Marine Murtskhvaladze, Ann Machabliashvili, Lela Sabadze, Mari Gavashelidze, Ana Papkauri, Meri Pantsulaia, Gvantsa Brachveli, Tata Imnadze, Tamar Jashishvili, Tea Tvedoradze, Ketevan Sidamonidze, Ekaterine Khmaladze, Ekaterine Zhghenti, Roena Sukhiashvili, Mariam Zakalashvili, Lela Urushadze, Magda Dgebuadze, Giorgi Tomashvili, Davit Tsaguria, Ekaterine Zangaladze, Nino Berishvili, Gvantsa Chanturia, Adam Kotorashvili, Maia Alkhazashvili, Irma Burjanadze, Anna Kasradze, Khatuna Zakhshvili, Paata Imnadze, Amiran Gamkrelidze. |
| EPI_ISL_415641 | hCoV-19/Georgia/Tb-54/2020   | Asia / Georgia / Tbilisi           | 2020-02-27 | R. G. Lugar Center for Public Health Research, National Center for Disease Control and Public Health (NCDC) of Georgia. | R. G. Lugar Center for Public Health Research, National Center for Disease Control and Public Health (NCDC) of Georgia. | Nato Kotaria, Marine Murtskhvaladze, Ann Machabliashvili, Lela Sabadze, Mari Gavashelidze, Ana Papkauri, Meri Pantsulaia, Gvantsa Brachveli, Tata Imnadze, Tamar Jashishvili, Tea Tvedoradze, Ketevan Sidamonidze, Ekaterine Khmaladze, Ekaterine Zhghenti, Roena Sukhiashvili, Mariam Zakalashvili, Lela Urushadze, Magda Dgebuadze, Giorgi Tomashvili, Davit Tsaguria, Ekaterine Zangaladze, Nino Berishvili, Gvantsa Chanturia, Adam Kotorashvili, Maia Alkhazashvili, Irma Burjanadze, Anna Kasradze, Khatuna Zakhshvili, Paata Imnadze, Amiran Gamkrelidze.                                                                      |
| EPI_ISL_415642 | hCoV-19/Georgia/Tb-477/2020  | Asia / Georgia / Tbilisi           | 2020-03-10 | R. G. Lugar Center for Public Health Research, National Center for Disease Control and Public Health (NCDC) of Georgia. | R. G. Lugar Center for Public Health Research, National Center for Disease Control and Public Health (NCDC) of Georgia. | Nato Kotaria, Marine Murtskhvaladze, Ann Machabliashvili, Lela Sabadze, Mari Gavashelidze, Ana Papkauri, Meri Pantsulaia, Gvantsa Brachveli, Tata Imnadze, Tamar Jashishvili, Tea Tvedoradze, Ketevan Sidamonidze, Ekaterine Khmaladze, Ekaterine Zhghenti, Roena Sukhiashvili, Mariam Zakalashvili, Lela Urushadze, Magda Dgebuadze, Giorgi Tomashvili, Davit Tsaguria, Ekaterine Zangaladze, Nino Berishvili, Gvantsa Chanturia, Adam Kotorashvili, Maia Alkhazashvili, Irma Burjanadze, Anna Kasradze, Khatuna Zakhshvili, Paata Imnadze, Amiran Gamkrelidze.                                                                      |
| EPI_ISL_415643 | hCoV-19/Georgia/Tb-468/2020  | Asia / Georgia / Tbilisi           | 2020-03-10 | R. G. Lugar Center for Public Health Research, National Center for Disease Control and Public Health (NCDC) of Georgia. | R. G. Lugar Center for Public Health Research, National Center for Disease Control and Public Health (NCDC) of Georgia. | Nato Kotaria, Marine Murtskhvaladze, Ann Machabliashvili, Lela Sabadze, Mari Gavashelidze, Ana Papkauri, Meri Pantsulaia, Gvantsa Brachveli, Tata Imnadze, Tamar Jashishvili, Tea Tvedoradze, Ketevan Sidamonidze, Ekaterine Khmaladze, Ekaterine Zhghenti, Roena Sukhiashvili, Mariam Zakalashvili, Lela Urushadze, Magda Dgebuadze, Giorgi Tomashvili, Davit Tsaguria, Ekaterine Zangaladze, Nino Berishvili, Gvantsa Chanturia, Adam Kotorashvili, Maia Alkhazashvili, Irma Burjanadze, Anna Kasradze, Khatuna Zakhshvili, Paata Imnadze, Amiran Gamkrelidze.                                                                      |
| EPI_ISL_415644 | hCoV-19/Georgia/Tb-82/2020   | Asia / Georgia / Tbilisi           | 2020-02-28 | R. G. Lugar Center for Public Health Research, National Center for Disease Control and Public Health (NCDC) of Georgia. | R. G. Lugar Center for Public Health Research, National Center for Disease Control and Public Health (NCDC) of Georgia. | Nato Kotaria, Marine Murtskhvaladze, Ann Machabliashvili, Lela Sabadze, Mari Gavashelidze, Ana Papkauri, Meri Pantsulaia, Gvantsa Brachveli, Tata Imnadze, Tamar Jashishvili, Tea Tvedoradze, Ketevan Sidamonidze, Ekaterine Khmaladze, Ekaterine Zhghenti, Roena Sukhiashvili, Mariam Zakalashvili, Lela Urushadze, Magda Dgebuadze, Giorgi Tomashvili, Davit Tsaguria, Ekaterine Zangaladze, Nino Berishvili, Gvantsa Chanturia, Adam Kotorashvili, Maia Alkhazashvili, Irma Burjanadze, Anna Kasradze, Khatuna Zakhshvili, Paata Imnadze, Amiran Gamkrelidze.                                                                      |
| EPI_ISL_415646 | hCoV-19/Denmark/SSI-101/2020 | Europe / Denmark                   | 2020-03-03 | Department of Virus and Microbiological Special diagnostics, Statens Serum Institut, Copenhagen, Denmark.               | ViFU                                                                                                                    | Morten Rasmussen, Maiken Worsoe Rosenstjerne , Anders Fomsgaard                                                                                                                                                                                                                                                                                                                                                                                                                                                                                                                                                                       |
| EPI_ISL_415647 | hCoV-19/Denmark/SSI-102/2020 | Europe / Denmark / Copenhagen      | 2020-03-03 | Department of Virus and Microbiological Special diagnostics, Statens Serum Institut, Copenhagen, Denmark.               | Statens Serum Institute                                                                                                 | Morten Rasmussen, Maiken Worsoe Rosenstjerne , Anders Fomsgaard                                                                                                                                                                                                                                                                                                                                                                                                                                                                                                                                                                       |

|                |                                       |                                       |            |                                                                                                                                                                                                                                |                                                                                                                                                                                                                                |                                                                                                                                                                                                                                                                                   |
|----------------|---------------------------------------|---------------------------------------|------------|--------------------------------------------------------------------------------------------------------------------------------------------------------------------------------------------------------------------------------|--------------------------------------------------------------------------------------------------------------------------------------------------------------------------------------------------------------------------------|-----------------------------------------------------------------------------------------------------------------------------------------------------------------------------------------------------------------------------------------------------------------------------------|
| EPI_ISL_415648 | hCoV-19/Denmark/SSI-104/2020          | Europe / Denmark                      | 2020-03-03 | Department of Virus and Microbiological Special diagnostics, Statens Serum Institut, Copenhagen, Denmark.                                                                                                                      | ViFU                                                                                                                                                                                                                           | Morten Rasmussen, Maiken Worsoe Rosenstjerne, Anders Fomsgaard                                                                                                                                                                                                                    |
| EPI_ISL_415649 | hCoV-19/France/HF2039/2020            | Europe / France / Hauts-de-France / C | 2020-03-05 | unknown                                                                                                                                                                                                                        | National Reference Center for Viruses of Respiratory Infections, Institut Pasteur, Paris                                                                                                                                       | Méline Albert, Marion Barbet, Sylvie Behillil, Méline Bizard, Angela Brisebarre, Flora Donati Vincent Enouf, Maud Vanpeene, Sylvie van der Werf                                                                                                                                   |
| EPI_ISL_415650 | hCoV-19/France/IDF2075/2020           | Europe / France / IDF                 | 2020-03-02 | Hôpital Instruction des Armées - BEGIN                                                                                                                                                                                         | National Reference Center for Viruses of Respiratory Infections, Institut Pasteur, Paris                                                                                                                                       | Méline Albert, Marion Barbet, Sylvie Behillil, Méline Bizard, Angela Brisebarre, Flora Donati Vincent Enouf, Maud Vanpeene, Sylvie van der Werf, Christine Bigaillon                                                                                                              |
| EPI_ISL_415651 | hCoV-19/France/BFC2094/2020           | Europe / France / Bourgogne-France-   | 2020-03-05 | Unknown                                                                                                                                                                                                                        | National Reference Center for Viruses of Respiratory Infections, Institut Pasteur, Paris                                                                                                                                       | Méline Albert, Marion Barbet, Sylvie Behillil, Méline Bizard, Angela Brisebarre, Flora Donati Vincent Enouf, Maud Vanpeene, Sylvie van der Werf                                                                                                                                   |
| EPI_ISL_415652 | hCoV-19/France/BFC2147/2020           | Europe / France / Bourgogne-France-   | 2020-03-05 | unknown                                                                                                                                                                                                                        | National Reference Center for Viruses of Respiratory Infections, Institut Pasteur, Paris                                                                                                                                       | Méline Albert, Marion Barbet, Sylvie Behillil, Méline Bizard, Angela Brisebarre, Flora Donati Vincent Enouf, Maud Vanpeene, Sylvie van der Werf                                                                                                                                   |
| EPI_ISL_415653 | hCoV-19/France/HF2151/2020            | Europe / France / Hauts de France / C | 2020-03-08 | Centre Hospitalier Compiègne Laboratoire de Biologie                                                                                                                                                                           | National Reference Center for Viruses of Respiratory Infections, Institut Pasteur, Paris                                                                                                                                       | Méline Albert, Marion Barbet, Sylvie Behillil, Méline Bizard, Angela Brisebarre, Flora Donati Vincent Enouf, Maud Vanpeene, Sylvie van der Werf, Raulin Olivia                                                                                                                    |
| EPI_ISL_415654 | hCoV-19/France/HF2174/2020            | Europe / France / Hauts de France / C | 2020-03-09 | Centre Hospitalier Compiègne Laboratoire de Biologie                                                                                                                                                                           | National Reference Center for Viruses of Respiratory Infections, Institut Pasteur, Paris                                                                                                                                       | Méline Albert, Marion Barbet, Sylvie Behillil, Méline Bizard, Angela Brisebarre, Flora Donati Vincent Enouf, Maud Vanpeene, Sylvie van der Werf, Raulin Olivia                                                                                                                    |
| EPI_ISL_415655 | hCoV-19/Wales/PHW27/2020              | Europe / United Kingdom / Wales       | 2020-03-12 | Wales Specialist Virology Centre                                                                                                                                                                                               | Public Health Wales Microbiology Cardiff                                                                                                                                                                                       | Catherine Moore, Joanne Watkins, Sally Corden, Tom Connor                                                                                                                                                                                                                         |
| EPI_ISL_415656 | hCoV-19/Wales/PHW33/2020              | Europe / United Kingdom / Wales       | 2020-03-12 | Wales Specialist Virology Centre                                                                                                                                                                                               | Public Health Wales Microbiology Cardiff                                                                                                                                                                                       | Catherine Moore, Joanne Watkins, Sally Corden, Tom Connor                                                                                                                                                                                                                         |
| EPI_ISL_415657 | hCoV-19/Wales/PHW37/2020              | Europe / United Kingdom / Wales       | 2020-03-12 | Wales Specialist Virology Centre                                                                                                                                                                                               | Public Health Wales Microbiology Cardiff                                                                                                                                                                                       | Catherine Moore, Joanne Watkins, Sally Corden, Tom Connor                                                                                                                                                                                                                         |
| EPI_ISL_415658 | hCoV-19/Chile/Santiago_op2d1/2020     | South America / Chile / Santiago      | 2020-03-06 | Laboratory of Molecular Virology, Pontificia Universidad Católica de Chile                                                                                                                                                     | MSSH Pathogen Surveillance Program                                                                                                                                                                                             | Rafael A. Medina, Pablo Vial, Tamara Garcia, Eileen Serrano, Ana Silvia Gonzalez-Reiche, Zenab Khan, Mitchell Sullivan, Ajay Obla, Matthew Hernandez, Hala Alshammry, Juan Soto, Shwetha Sridhar Hara, Ying-Chih Wang, Melissa Smith, Robert Sebra, Viviana Simon, Harm van Bakel |
| EPI_ISL_415659 | hCoV-19/Wales/PHW28/2020              | Europe / United Kingdom / Wales       | 2020-03-12 | Wales Specialist Virology Centre                                                                                                                                                                                               | Public Health Wales Microbiology Cardiff                                                                                                                                                                                       | Catherine Moore, Joanne Watkins, Sally Corden, Tom Connor                                                                                                                                                                                                                         |
| EPI_ISL_415660 | hCoV-19/Chile/Santiago_op3d1/2020     | South America / Chile / Santiago      | 2020-03-07 | Laboratory of Molecular Virology, Pontificia Universidad Católica de Chile                                                                                                                                                     | MSSH Pathogen Surveillance Program                                                                                                                                                                                             | Rafael A. Medina, Pablo Vial, Tamara Garcia, Eileen Serrano, Ana Silvia Gonzalez-Reiche, Zenab Khan, Mitchell Sullivan, Ajay Obla, Matthew Hernandez, Hala Alshammry, Juan Soto, Shwetha Sridhar Hara, Ying-Chih Wang, Melissa Smith, Robert Sebra, Viviana Simon, Harm van Bakel |
| EPI_ISL_415661 | hCoV-19/Chile/Santiago_op4d1/2020     | South America / Chile / Santiago      | 2020-03-08 | Laboratory of Molecular Virology, Pontificia Universidad Católica de Chile                                                                                                                                                     | MSSH Pathogen Surveillance Program                                                                                                                                                                                             | Rafael A. Medina, Pablo Vial, Tamara Garcia, Eileen Serrano, Ana Silvia Gonzalez-Reiche, Zenab Khan, Mitchell Sullivan, Ajay Obla, Matthew Hernandez, Hala Alshammry, Juan Soto, Shwetha Sridhar Hara, Ying-Chih Wang, Melissa Smith, Robert Sebra, Viviana Simon, Harm van Bakel |
| EPI_ISL_415698 | hCoV-19/Switzerland/GR2988/2020       | Europe / Switzerland                  | 2020-02-27 | Hôpitaux universitaires de Genève Laboratoire de Virologie                                                                                                                                                                     | Hôpitaux universitaires de Genève Laboratoire de Virologie                                                                                                                                                                     | Laubscher F.                                                                                                                                                                                                                                                                      |
| EPI_ISL_415699 | hCoV-19/Switzerland/GR3043/2020       | Europe / Switzerland                  | 2020-02-27 | Hôpitaux universitaires de Genève Laboratoire de Virologie                                                                                                                                                                     | Hôpitaux universitaires de Genève Laboratoire de Virologie                                                                                                                                                                     | Laubscher F.                                                                                                                                                                                                                                                                      |
| EPI_ISL_415700 | hCoV-19/Switzerland/GE1402/2020       | Europe / Switzerland                  | 2020-02-28 | Hôpitaux universitaires de Genève Laboratoire de Virologie                                                                                                                                                                     | Hôpitaux universitaires de Genève Laboratoire de Virologie                                                                                                                                                                     | Laubscher F.                                                                                                                                                                                                                                                                      |
| EPI_ISL_415701 | hCoV-19/Switzerland/BS0914/2020       | Europe / Switzerland                  | 2020-03-02 | Hôpitaux universitaires de Genève Laboratoire de Virologie                                                                                                                                                                     | Hôpitaux universitaires de Genève Laboratoire de Virologie                                                                                                                                                                     | Laubscher F.                                                                                                                                                                                                                                                                      |
| EPI_ISL_415702 | hCoV-19/Switzerland/SZ1417/2020       | Europe / Switzerland                  | 2020-03-02 | Hôpitaux universitaires de Genève Laboratoire de Virologie                                                                                                                                                                     | Hôpitaux universitaires de Genève Laboratoire de Virologie                                                                                                                                                                     | Laubscher F.                                                                                                                                                                                                                                                                      |
| EPI_ISL_415703 | hCoV-19/Switzerland/TI2045/2020       | Europe / Switzerland                  | 2020-03-01 | Hôpitaux universitaires de Genève Laboratoire de Virologie                                                                                                                                                                     | Hôpitaux universitaires de Genève Laboratoire de Virologie                                                                                                                                                                     | Laubscher F.                                                                                                                                                                                                                                                                      |
| EPI_ISL_415704 | hCoV-19/Switzerland/BE2536/2020       | Europe / Switzerland                  | 2020-03-04 | Hôpitaux universitaires de Genève Laboratoire de Virologie                                                                                                                                                                     | Hôpitaux universitaires de Genève Laboratoire de Virologie                                                                                                                                                                     | Laubscher F.                                                                                                                                                                                                                                                                      |
| EPI_ISL_415705 | hCoV-19/Switzerland/GE4135/2020       | Europe / Switzerland                  | 2020-03-06 | Hôpitaux universitaires de Genève Laboratoire de Virologie                                                                                                                                                                     | Hôpitaux universitaires de Genève Laboratoire de Virologie                                                                                                                                                                     | Laubscher F.                                                                                                                                                                                                                                                                      |
| EPI_ISL_415706 | hCoV-19/Switzerland/GE06207/2020      | Europe / Switzerland                  | 2020-03-06 | Hôpitaux universitaires de Genève Laboratoire de Virologie                                                                                                                                                                     | Hôpitaux universitaires de Genève Laboratoire de Virologie                                                                                                                                                                     | Laubscher F.                                                                                                                                                                                                                                                                      |
| EPI_ISL_415707 | hCoV-19/Switzerland/GE6679/2020       | Europe / Switzerland                  | 2020-03-08 | Hôpitaux universitaires de Genève Laboratoire de Virologie                                                                                                                                                                     | Hôpitaux universitaires de Genève Laboratoire de Virologie                                                                                                                                                                     | Laubscher F.                                                                                                                                                                                                                                                                      |
| EPI_ISL_415708 | hCoV-19/Switzerland/GE4984/2020       | Europe / Switzerland                  | 2020-03-07 | Hôpitaux universitaires de Genève Laboratoire de Virologie                                                                                                                                                                     | Hôpitaux universitaires de Genève Laboratoire de Virologie                                                                                                                                                                     | Laubscher F.                                                                                                                                                                                                                                                                      |
| EPI_ISL_415709 | hCoV-19/Hangzhou/ZJU-01/2020          | Asia / China / Hangzhou               | 2020-01-25 | State Key Laboratory for Diagnosis and Treatment of Infectious Diseases, National Clinical Research Center for Infectious Diseases, First Affiliated Hospital, Zhejiang University School of Medicine, Hangzhou, China. 310003 | State Key Laboratory for Diagnosis and Treatment of Infectious Diseases, National Clinical Research Center for Infectious Diseases, First Affiliated Hospital, Zhejiang University School of Medicine, Hangzhou, China. 310003 | Hangping Yao, Nanping Wu, Chao Jiang, Xiangyun Lu, Linfang Cheng, Fumin Liu, Zhigang Wu, Haibo Wu, Changzhong Jin, Min Zheng, Lanjuan Li                                                                                                                                          |
| EPI_ISL_415710 | hCoV-19/Russia/StPetersburg-3524/2020 | Europe / Russia / Saint Petersburg    | 2020-03-15 | WHO National Influenza Centre Russian Federation                                                                                                                                                                               | WHO National Influenza Centre Russian Federation                                                                                                                                                                               | Andrey Komissarov, Artem Fadeev, Anna Ivanova, Daria Danilenko                                                                                                                                                                                                                    |
| EPI_ISL_415711 | hCoV-19/Hangzhou/ZJU-05/2020          | Asia / China / Hangzhou               | 2020-01-22 | State Key Laboratory for Diagnosis and Treatment of Infectious Diseases, National Clinical Research Center for Infectious Diseases, First Affiliated Hospital, Zhejiang University School of Medicine, Hangzhou, China. 310003 | State Key Laboratory for Diagnosis and Treatment of Infectious Diseases, National Clinical Research Center for Infectious Diseases, First Affiliated Hospital, Zhejiang University School of Medicine, Hangzhou, China. 310003 | Hangping Yao, Nanping Wu, Chao Jiang, Xiangyun Lu, Linfang Cheng, Fumin Liu, Zhigang Wu, Haibo Wu, Changzhong Jin, Min Zheng, Lanjuan Li                                                                                                                                          |
| EPI_ISL_415741 | hCoV-19/Taiwan/CGMH-CGU-03/2020       | Asia / Taiwan / Taoyuan               | 2020-02-26 | Laboratory Medicine                                                                                                                                                                                                            | Department of Laboratory Medicine, Lin-Kou Chang Gung Memorial Hospital, Taoyuan, Taiwan                                                                                                                                       | Kuo-Chien Tsao, Yu-Nong Gong, Shu-Li Yang, Yi-Chun Liu, Chung-Guei Huang, Po-Wei Huang, Mei-Jen Hsiao, Cheng-Ta Yang, Cheng-Hsun Chiu, Chi-Hsien Huang, Kuang-Tso Le, Shu-Min Lin, Peng-Nien Huang, Kuo-Ming Lee, Guang-Wu Chen, Shin-Ru Shih                                     |

|                |                                 |                                        |            |                                                                                                                                                                                                                                |                                                                                                                                                                                                                                |                                                                                                                                                                                                                                                                                                             |
|----------------|---------------------------------|----------------------------------------|------------|--------------------------------------------------------------------------------------------------------------------------------------------------------------------------------------------------------------------------------|--------------------------------------------------------------------------------------------------------------------------------------------------------------------------------------------------------------------------------|-------------------------------------------------------------------------------------------------------------------------------------------------------------------------------------------------------------------------------------------------------------------------------------------------------------|
| EPI_ISL_415742 | hCoV-19/Taiwan/CGMH-CGU-04/2020 | Asia / Taiwan / Taoyuan                | 2020-02-27 | Laboratory Medicine                                                                                                                                                                                                            | Department of Laboratory Medicine, Lin-Kou Chang Gung Memorial Hospital, Taoyuan, Taiwan                                                                                                                                       | Kuo-Chien Tsao, Yu-Nong Gong, Shu-Li Yang, Yi-Chun Liu, Chung-Guei Huang, Po-Wei Huang, Mei-Jen Hsiao, Cheng-Ta Yang, Cheng-Hsun Chiu, Chi-Hsien Huang, Kuang-Tso Le, Shu-Min Lin, Peng-Nien Huang, Kuo-Ming Lee, Guang-Wu Chen, Shin-Ru Shih                                                               |
| EPI_ISL_415743 | hCoV-19/Taiwan/CGMH-CGU-05/2020 | Asia / Taiwan / Taoyuan                | 2020-02-27 | Laboratory Medicine                                                                                                                                                                                                            | Department of Laboratory Medicine, Lin-Kou Chang Gung Memorial Hospital, Taoyuan, Taiwan                                                                                                                                       | Kuo-Chien Tsao, Yu-Nong Gong, Shu-Li Yang, Yi-Chun Liu, Chung-Guei Huang, Po-Wei Huang, Mei-Jen Hsiao, Cheng-Ta Yang, Cheng-Hsun Chiu, Chi-Hsien Huang, Kuang-Tso Le, Shu-Min Lin, Peng-Nien Huang, Kuo-Ming Lee, Guang-Wu Chen, Shin-Ru Shih                                                               |
| EPI_ISL_415787 | hCoV-19/Peru/010/2020           | South America / Peru / Lima            | 2020-03-10 | Laboratorio de Referencia Nacional de Virus Respiratorio.                                                                                                                                                                      | Laboratorio de Referencia Nacional de Biotecnología y Biología Molecular.Instituto Nacional de Salud.Peru                                                                                                                      | Carlos Padilla Rojas, Priscila Lope Pari, Karolyn Vega Chozo, Johanna Balbuena Torres, Omar Caceres Rey, Hemri Bailon Calderon, Maribel Huaranga Nuñez, Nancy Rojas Serrano                                                                                                                                 |
| EPI_ISL_415916 | hCoV-19/Wales/PHW25/2020        | Europe / United Kingdom / Wales        | 2020-03-11 | Wales Specialist Virology Centre                                                                                                                                                                                               | Public Health Wales Microbiology Cardiff                                                                                                                                                                                       | Catherine Moore, Joanne Watkins, Sally Corden, Tom Connor                                                                                                                                                                                                                                                   |
| EPI_ISL_415918 | hCoV-19/Wales/PHW26/2020        | Europe / United Kingdom / Wales        | 2020-03-11 | Wales Specialist Virology Centre                                                                                                                                                                                               | Public Health Wales Microbiology Cardiff                                                                                                                                                                                       | Catherine Moore, Joanne Watkins, Sally Corden, Tom Connor                                                                                                                                                                                                                                                   |
| EPI_ISL_415919 | hCoV-19/Wales/PHW29/2020        | Europe / United Kingdom / Wales        | 2020-03-11 | Wales Specialist Virology Centre                                                                                                                                                                                               | Public Health Wales Microbiology Cardiff                                                                                                                                                                                       | Catherine Moore, Joanne Watkins, Sally Corden, Tom Connor                                                                                                                                                                                                                                                   |
| EPI_ISL_415920 | hCoV-19/Wales/PHW32/2020        | Europe / United Kingdom / Wales        | 2020-03-12 | Wales Specialist Virology Centre                                                                                                                                                                                               | Public Health Wales Microbiology Cardiff                                                                                                                                                                                       | Catherine Moore, Joanne Watkins, Sally Corden, Tom Connor                                                                                                                                                                                                                                                   |
| EPI_ISL_415977 | hCoV-19/Wales/PHW07/2020        | Europe / United Kingdom / Wales        | 2020-03-08 | Wales Specialist Virology Centre                                                                                                                                                                                               | Public Health Wales Microbiology Cardiff                                                                                                                                                                                       | Catherine Moore, Joanne Watkins, Sally Corden, Tom Connor                                                                                                                                                                                                                                                   |
| EPI_ISL_415978 | hCoV-19/Wales/PHW09/2020        | Europe / United Kingdom / Wales        | 2020-03-08 | Wales Specialist Virology Centre                                                                                                                                                                                               | Public Health Wales Microbiology Cardiff                                                                                                                                                                                       | Catherine Moore, Joanne Watkins, Sally Corden, Tom Connor                                                                                                                                                                                                                                                   |
| EPI_ISL_415991 | hCoV-19/Wales/PHW18/2020        | Europe / United Kingdom / Wales        | 2020-03-09 | Wales Specialist Virology Centre                                                                                                                                                                                               | Public Health Wales Microbiology Cardiff                                                                                                                                                                                       | Catherine Moore, Joanne Watkins, Sally Corden, Tom Connor                                                                                                                                                                                                                                                   |
| EPI_ISL_416024 | hCoV-19/Wales/PHW35/2020        | Europe / United Kingdom / Wales        | 2020-03-11 | Laboratorio de Referencia Nacional de Virus Respiratorios.                                                                                                                                                                     | Laboratorio de Referencia Nacional de Biotecnología y Biología Molecular.                                                                                                                                                      | Carlos Padilla Rojas, Priscila Lope Pari, Karolyn Vega Chozo, Johanna Balbuena Torres, Omar Caceres Rey, Henri Bailon Calderon, Maribel Huaranga Nuñez, Nancy Rojas Serrano                                                                                                                                 |
| EPI_ISL_416025 | hCoV-19/Peru/01/2020            | South America / Peru / Lima            | 2020-03-05 | Instituto Nacional de Salud Peru                                                                                                                                                                                               | Instituto Nacional de Salud Peru                                                                                                                                                                                               | Catherine Moore, Joanne Watkins, Sally Corden, Tom Connor                                                                                                                                                                                                                                                   |
| EPI_ISL_416026 | hCoV-19/Wales/PHW21/2020        | Europe / United Kingdom / Wales        | 2020-03-11 | Wales Specialist Virology Centre                                                                                                                                                                                               | Public Health Wales Microbiology Cardiff                                                                                                                                                                                       | Catherine Moore, Joanne Watkins, Sally Corden, Tom Connor                                                                                                                                                                                                                                                   |
| EPI_ISL_416027 | hCoV-19/Wales/PHW17/2020        | Europe / United Kingdom / Wales        | 2020-03-09 | Wales Specialist Virology Centre                                                                                                                                                                                               | Public Health Wales Microbiology Cardiff                                                                                                                                                                                       | Catherine Moore, Joanne Watkins, Sally Corden, Tom Connor                                                                                                                                                                                                                                                   |
| EPI_ISL_416028 | hCoV-19/Brazil/SPBR-07/2020     | South America / Brazil / Sao Paulo / ¶ | 2020-03-03 | National Influenza Center - Instituto Adolfo Lutz                                                                                                                                                                              | Instituto Adolfo Lutz, Interdisciplinary Procedures Center, Strategic Laboratory                                                                                                                                               | Claudio Tavares Sacchi, Claudia Regina Gonçalves, Carlos Henrique Camargo, Fabiana Cristina Pereira dos Santos, Daniela Bernardes Borges da Silva, Simone Guadagnucci Morillo, Adriano Abbud, Adriana Bugno, Maria do Carmo Sampaio Tavares Timenetsky, Terezinha Maria de Paiva                            |
| EPI_ISL_416029 | hCoV-19/Brazil/SPBR-08/2020     | South America / Brazil / Sao Paulo / ¶ | 2020-03-04 | Laboratório Fleury                                                                                                                                                                                                             | Instituto Adolfo Lutz, Interdisciplinary Procedures Center, Strategic Laboratory                                                                                                                                               | Claudio Tavares Sacchi, Claudia Regina Gonçalves, Carlos Henrique Camargo, Fabiana Cristina Pereira dos Santos, Daniela Bernardes Borges da Silva, Simone Guadagnucci Morillo, Adriano Abbud, Adriana Bugno, Maria do Carmo Sampaio Tavares Timenetsky, Terezinha Maria de Paiva                            |
| EPI_ISL_416031 | hCoV-19/Brazil/SPBR-09/2020     | South America / Brazil / Sao Paulo / ¶ | 2020-03-04 | National Influenza Center - Instituto Adolfo Lutz                                                                                                                                                                              | Instituto Adolfo Lutz, Interdisciplinary Procedures Center, Strategic Laboratory                                                                                                                                               | Claudio Tavares Sacchi, Claudia Regina Gonçalves, Carlos Henrique Camargo, Fabiana Cristina Pereira dos Santos, Daniela Bernardes Borges da Silva, Simone Guadagnucci Morillo, Adriano Abbud, Adriana Bugno, Maria do Carmo Sampaio Tavares Timenetsky, Terezinha Maria de Paiva                            |
| EPI_ISL_416032 | hCoV-19/Brazil/SPBR-10/2020     | South America / Brazil / Distrito Fede | 2020-03-04 | National Influenza Center - Instituto Adolfo Lutz                                                                                                                                                                              | Instituto Adolfo Lutz, Interdisciplinary Procedures Center, Strategic Laboratory                                                                                                                                               | Claudio Tavares Sacchi, Claudia Regina Gonçalves, Carlos Henrique Camargo, Fabiana Cristina Pereira dos Santos, Daniela Bernardes Borges da Silva, Simone Guadagnucci Morillo, Adriano Abbud, Adriana Bugno, Maria do Carmo Sampaio Tavares Timenetsky, Terezinha Maria de Paiva                            |
| EPI_ISL_416033 | hCoV-19/Brazil/SPBR-11/2020     | South America / Brazil / Sao Paulo / ¶ | 2020-03-03 | Hospital Israelita Albert Einstein                                                                                                                                                                                             | Instituto Adolfo Lutz, Interdisciplinary Procedures Center, Strategic Laboratory                                                                                                                                               | Claudio Tavares Sacchi, Claudia Regina Gonçalves, Carlos Henrique Camargo, Erica Valessa Ramos Gomes, Fabiana Cristina Pereira dos Santos, Daniela Bernardes Borges da Silva, Simone Guadagnucci Morillo, Adriano Abbud, Adriana Bugno, Maria do Carmo Sampaio Tavares Timenetsky, Terezinha Maria de Paiva |
| EPI_ISL_416034 | hCoV-19/Brazil/SPBR-12/2020     | South America / Brazil / Sao Paulo / ¶ | 2020-03-04 | Hospital Israelita Albert Einstein                                                                                                                                                                                             | Instituto Adolfo Lutz, Interdisciplinary Procedures Center, Strategic Laboratory                                                                                                                                               | Claudio Tavares Sacchi, Claudia Regina Gonçalves, Carlos Henrique Camargo, Erica Valessa Ramos Gomes, Fabiana Cristina Pereira dos Santos, Daniela Bernardes Borges da Silva, Simone Guadagnucci Morillo, Adriano Abbud, Adriana Bugno, Maria do Carmo Sampaio Tavares Timenetsky, Terezinha Maria de Paiva |
| EPI_ISL_416035 | hCoV-19/Brazil/SPBR-13/2020     | South America / Brazil / Sao Paulo / ¶ | 2020-03-05 | National Influenza Center - Instituto Adolfo Lutz                                                                                                                                                                              | Instituto Adolfo Lutz, Interdisciplinary Procedures Center, Strategic Laboratory                                                                                                                                               | Claudio Tavares Sacchi, Claudia Regina Gonçalves, Carlos Henrique Camargo, Erica Valessa Ramos Gomes, Fabiana Cristina Pereira dos Santos, Daniela Bernardes Borges da Silva, Simone Guadagnucci Morillo, Adriano Abbud, Adriana Bugno, Maria do Carmo Sampaio Tavares Timenetsky, Terezinha Maria de Paiva |
| EPI_ISL_416036 | hCoV-19/Brazil/SPBR-14/2020     | South America / Brazil / Sao Paulo / ¶ | 2020-03-05 | National Influenza Center - Instituto Adolfo Lutz                                                                                                                                                                              | Instituto Adolfo Lutz, Interdisciplinary Procedures Center, Strategic Laboratory                                                                                                                                               | Claudio Tavares Sacchi, Claudia Regina Gonçalves, Carlos Henrique Camargo, Erica Valessa Ramos Gomes, Fabiana Cristina Pereira dos Santos, Daniela Bernardes Borges da Silva, Simone Guadagnucci Morillo, Adriano Abbud, Adriana Bugno, Maria do Carmo Sampaio Tavares Timenetsky, Terezinha Maria de Paiva |
| EPI_ISL_416042 | hCoV-19/Hangzhou/ZJU-02/2020    | Asia / China / Hangzhou                | 2020-01-26 | State Key Laboratory for Diagnosis and Treatment of Infectious Diseases, National Clinical Research Center for Infectious Diseases, First Affiliated Hospital, Zhejiang University School of Medicine, Hangzhou, China. 310003 | State Key Laboratory for Diagnosis and Treatment of Infectious Diseases, National Clinical Research Center for Infectious Diseases, First Affiliated Hospital, Zhejiang University School of Medicine, Hangzhou, China. 310003 | Hangping Yao, Nanping Wu, Chao Jiang, Xiangyun Lu, Linfang Cheng, Fumin Liu, Zhigang Wu, Haibo Wu, Changzhong Jin, Min Zheng, Lanjuan Li                                                                                                                                                                    |
| EPI_ISL_416044 | hCoV-19/Hangzhou/ZJU-03/2020    | Asia / China / Hangzhou                | 2020-01-25 | State Key Laboratory for Diagnosis and Treatment of Infectious Diseases, National Clinical Research Center for Infectious Diseases, First Affiliated Hospital, Zhejiang University School of Medicine, Hangzhou, China 310003  | State Key Laboratory for Diagnosis and Treatment of Infectious Diseases, National Clinical Research Center for Infectious Diseases, First Affiliated Hospital, Zhejiang University School of Medicine, Hangzhou, China 310003  | Hangping Yao, Nanping Wu, Chao Jiang, Xiangyun Lu, Linfang Cheng, Fumin Liu, Zhigang Wu, Haibo Wu, Changzhong Jin, Min Zheng, Lanjuan Li                                                                                                                                                                    |

|                |                              |                               |            |                                                                                                                                                                                                                               |                                                                                                                                                                                                                               |                                                                                                                                          |
|----------------|------------------------------|-------------------------------|------------|-------------------------------------------------------------------------------------------------------------------------------------------------------------------------------------------------------------------------------|-------------------------------------------------------------------------------------------------------------------------------------------------------------------------------------------------------------------------------|------------------------------------------------------------------------------------------------------------------------------------------|
| EPI_ISL_416046 | hCoV-19/Hangzhou/ZJU-04/2020 | Asia / China / Hangzhou       | 2020-01-24 | State Key Laboratory for Diagnosis and Treatment of Infectious Diseases, National Clinical Research Center for Infectious Diseases, First Affiliated Hospital, Zhejiang University School of Medicine, Hangzhou, China 310003 | State Key Laboratory for Diagnosis and Treatment of Infectious Diseases, National Clinical Research Center for Infectious Diseases, First Affiliated Hospital, Zhejiang University School of Medicine, Hangzhou, China 310003 | Hangping Yao, Nanping Wu, Chao Jiang, Xiangyun Lu, Linfang Cheng, Fumin Liu, Zhigang Wu, Haibo Wu, Changzhong Jin, Min Zheng, Lanjuan Li |
| EPI_ISL_416047 | hCoV-19/Hangzhou/ZJU-06/2020 | Asia / China / Hangzhou       | 2020-02-02 | State Key Laboratory for Diagnosis and Treatment of Infectious Diseases, National Clinical Research Center for Infectious Diseases, First Affiliated Hospital, Zhejiang University School of Medicine, Hangzhou, China 310003 | State Key Laboratory for Diagnosis and Treatment of Infectious Diseases, National Clinical Research Center for Infectious Diseases, First Affiliated Hospital, Zhejiang University School of Medicine, Hangzhou, China 310003 | Hangping Yao, Nanping Wu, Chao Jiang, Xiangyun Lu, Linfang Cheng, Fumin Liu, Zhigang Wu, Haibo Wu, Changzhong Jin, Min Zheng, Lanjuan Li |
| EPI_ISL_416140 | hCoV-19/Denmark/SSI-05/2020  | Europe / Denmark / Copenhagen | 2020-03-02 | Department of Virus and Microbiological Special diagnostics, Statens Serum Institut, Copenhagen, Denmark.                                                                                                                     | Statens Serum Institute                                                                                                                                                                                                       | Morten Rasmussen, Maiken Worsoe Rosenstjerne , Anders Fomsgaard                                                                          |
| EPI_ISL_416141 | hCoV-19/Denmark/SSI-09/2020  | Europe / Denmark / Copenhagen | 2020-03-03 | Department of Virus and Microbiological Special diagnostics, Statens Serum Institut, Copenhagen, Denmark.                                                                                                                     | Statens Serum Institute                                                                                                                                                                                                       | Morten Rasmussen, Maiken Worsoe Rosenstjerne , Anders Fomsgaard                                                                          |
| EPI_ISL_416142 | hCoV-19/Denmark/SSI-01/2020  | Europe / Denmark / Copenhagen | 2020-02-26 | Department of Virus and Microbiological Special diagnostics, Statens Serum Institut, Copenhagen, Denmark.                                                                                                                     | Statens Serum Institute                                                                                                                                                                                                       | Morten Rasmussen, Maiken Worsoe Rosenstjerne , Anders Fomsgaard                                                                          |
| EPI_ISL_416143 | hCoV-19/Denmark/SSI-02/2020  | Europe / Denmark / Copenhagen | 2020-02-28 | Department of Virus and Microbiological Special diagnostics, Statens Serum Institut, Copenhagen, Denmark.                                                                                                                     | ViFU                                                                                                                                                                                                                          | Morten Rasmussen, Maiken Worsoe Rosenstjerne , Anders Fomsgaard                                                                          |
| EPI_ISL_416144 | hCoV-19/Denmark/SSI-03/2020  | Europe / Denmark / Copenhagen | 2020-03-01 | Department of Virus and Microbiological Special diagnostics, Statens Serum Institut, Copenhagen, Denmark.                                                                                                                     | ViFU                                                                                                                                                                                                                          | Morten Rasmussen, Maiken Worsoe Rosenstjerne , Anders Fomsgaard                                                                          |
| EPI_ISL_416153 | hCoV-19/Denmark/SSI-04/2020  | Europe / Denmark / Copenhagen | 2020-03-02 | Department of Virus and Microbiological Special diagnostics, Statens Serum Institut, Copenhagen, Denmark.                                                                                                                     | ViFU                                                                                                                                                                                                                          | Morten Rasmussen, Maiken Worsoe Rosenstjerne , Anders Fomsgaard                                                                          |
| EPI_ISL_416314 | hCoV-19/Hong Kong/CUHK1/2020 | Asia / Hong Kong              | 2020-02-07 | Department of Microbiology, Faculty of Medicine, The Chinese University of Hong Kong, Hong Kong SAR, China                                                                                                                    | Department of Microbiology, Faculty of Medicine, Chinese University of Hong Kong, Hong Kong SAR, China                                                                                                                        | Zigui Chen, Paul KS Chan                                                                                                                 |
| EPI_ISL_416315 | hCoV-19/Hong Kong/CUHK2/2020 | Asia / Hong Kong              | 2020-02-19 | Department of Microbiology, Faculty of Medicine, The Chinese University of Hong Kong, Hong Kong SAR, China                                                                                                                    | Department of Microbiology, Faculty of Medicine, Chinese University of Hong Kong, Hong Kong SAR, China                                                                                                                        | Ziqui Chen, Paul KS Chan                                                                                                                 |
| EPI_ISL_416316 | hCoV-19/Shanghai/SH0002/2020 | Asia / China / Shanghai       | 2020-01-25 | Shanghai Public Health Clinical Center, Shanghai Medical College, Fudan University                                                                                                                                            | National Research Center for Translational Medicine (Shanghai), Ruijin Hospital affiliated to Shanghai Jiao Tong University School of Medicine & Shanghai Public Health Clinical Center                                       | Shengyue Wang, Xiaonan Zhang, Gang Lu, Yun Tan, Yun Ling, Hongzhou Lu, Saijuan Chen                                                      |
| EPI_ISL_416317 | hCoV-19/Shanghai/SH0003/2020 | Asia / China / Shanghai       | 2020-01-25 | Shanghai Public Health Clinical Center, Shanghai Medical College, Fudan University                                                                                                                                            | National Research Center for Translational Medicine (Shanghai), Ruijin Hospital affiliated to Shanghai Jiao Tong University School of Medicine & Shanghai Public Health Clinical Center                                       | Shengyue Wang, Xiaonan Zhang, Gang Lu, Yun Tan, Yun Ling, Hongzhou Lu, Saijuan Chen                                                      |
| EPI_ISL_416318 | hCoV-19/Shanghai/SH0004/2020 | Asia / China / Shanghai       | 2020-01-28 | Shanghai Public Health Clinical Center, Shanghai Medical College, Fudan University                                                                                                                                            | National Research Center for Translational Medicine (Shanghai), Ruijin Hospital affiliated to Shanghai Jiao Tong University School of Medicine & Shanghai Public Health Clinical Center                                       | Shengyue Wang, Xiaonan Zhang, Gang Lu, Yun Tan, Yun Ling, Hongzhou Lu, Saijuan Chen                                                      |
| EPI_ISL_416319 | hCoV-19/Shanghai/SH0005/2020 | Asia / China / Shanghai       | 2020-01-28 | Shanghai Public Health Clinical Center, Shanghai Medical College, Fudan University                                                                                                                                            | National Research Center for Translational Medicine (Shanghai), Ruijin Hospital affiliated to Shanghai Jiao Tong University School of Medicine & Shanghai Public Health Clinical Center                                       | Shengyue Wang, Xiaonan Zhang, Gang Lu, Yun Tan, Yun Ling, Hongzhou Lu, Saijuan Chen                                                      |
| EPI_ISL_416320 | hCoV-19/Shanghai/SH0007/2020 | Asia / China / Shanghai       | 2020-01-28 | Shanghai Public Health Clinical Center, Shanghai Medical College, Fudan University                                                                                                                                            | National Research Center for Translational Medicine (Shanghai), Ruijin Hospital affiliated to Shanghai Jiao Tong University School of Medicine & Shanghai Public Health Clinical Center                                       | Shengyue Wang, Xiaonan Zhang, Gang Lu, Yun Tan, Yun Ling, Hongzhou Lu, Saijuan Chen                                                      |
| EPI_ISL_416321 | hCoV-19/Shanghai/SH0008/2020 | Asia / China / Shanghai       | 2020-01-28 | Shanghai Public Health Clinical Center, Shanghai Medical College, Fudan University                                                                                                                                            | National Research Center for Translational Medicine (Shanghai), Ruijin Hospital affiliated to Shanghai Jiao Tong University School of Medicine & Shanghai Public Health Clinical Center                                       | Shengyue Wang, Xiaonan Zhang, Gang Lu, Yun Tan, Yun Ling, Hongzhou Lu, Saijuan Chen                                                      |
| EPI_ISL_416322 | hCoV-19/Shanghai/SH0009/2020 | Asia / China / Shanghai       | 2020-01-29 | Shanghai Public Health Clinical Center, Shanghai Medical College, Fudan University                                                                                                                                            | National Research Center for Translational Medicine (Shanghai), Ruijin Hospital affiliated to Shanghai Jiao Tong University School of Medicine & Shanghai Public Health Clinical Center                                       | Shengyue Wang, Xiaonan Zhang, Gang Lu, Yun Tan, Yun Ling, Hongzhou Lu, Saijuan Chen                                                      |
| EPI_ISL_416323 | hCoV-19/Shanghai/SH0010/2020 | Asia / China / Shanghai       | 2020-01-29 | Shanghai Public Health Clinical Center, Shanghai Medical College, Fudan University                                                                                                                                            | National Research Center for Translational Medicine (Shanghai), Ruijin Hospital affiliated to Shanghai Jiao Tong University School of Medicine & Shanghai Public Health Clinical Center                                       | Shengyue Wang, Xiaonan Zhang, Gang Lu, Yun Tan, Yun Ling, Hongzhou Lu, Saijuan Chen                                                      |
| EPI_ISL_416324 | hCoV-19/Shanghai/SH0011/2020 | Asia / China / Shanghai       | 2020-01-29 | Shanghai Public Health Clinical Center, Shanghai Medical College, Fudan University                                                                                                                                            | National Research Center for Translational Medicine (Shanghai), Ruijin Hospital affiliated to Shanghai Jiao Tong University School of Medicine & Shanghai Public Health Clinical Center                                       | Shengyue Wang, Xiaonan Zhang, Gang Lu, Yun Tan, Yun Ling, Hongzhou Lu, Saijuan Chen                                                      |













|                |                                       |                                   |            |                                                                                                                                                     |                                                                                                                                                                     |                                                                                                                                                                                                                                                                                                                                                                                                                                                 |
|----------------|---------------------------------------|-----------------------------------|------------|-----------------------------------------------------------------------------------------------------------------------------------------------------|---------------------------------------------------------------------------------------------------------------------------------------------------------------------|-------------------------------------------------------------------------------------------------------------------------------------------------------------------------------------------------------------------------------------------------------------------------------------------------------------------------------------------------------------------------------------------------------------------------------------------------|
| EPI_ISL_416416 | hCoV-19/USA/CT-Yale-001/2020          | North America / USA / Connecticut | 2020-03-06 | Connecticut State Department of Public Health                                                                                                       | Grubaugh Lab - Yale School of Public Health                                                                                                                         | Joseph Fauver, Chantal Vogels, Anderson Brito, Tara Alpert, Nagarjuna Cheemarla, Ellen Foxman, Anthony Muyombwe, Jafar Razeq, Richard Martinello, Albert Ko, Marie-Louise Landry, Nathan Grubaugh                                                                                                                                                                                                                                               |
| EPI_ISL_416417 | hCoV-19/USA/CT-Yale-002/2020          | North America / USA / Connecticut | 2020-03-10 | Connecticut State Department of Public Health                                                                                                       | Grubaugh Lab - Yale School of Public Health                                                                                                                         | Joseph Fauver, Chantal Vogels, Anderson Brito, Tara Alpert, Nagarjuna Cheemarla, Ellen Foxman, Anthony Muyombwe, Jafar Razeq, Richard Martinello, Albert Ko, Marie-Louise Landry, Nathan Grubaugh                                                                                                                                                                                                                                               |
| EPI_ISL_416418 | hCoV-19/USA/CT-Yale-003/2020          | North America / USA / Connecticut | 2020-03-08 | Connecticut State Department of Public Health                                                                                                       | Grubaugh Lab - Yale School of Public Health                                                                                                                         | Joseph Fauver, Chantal Vogels, Anderson Brito, Tara Alpert, Nagarjuna Cheemarla, Ellen Foxman, Anthony Muyombwe, Jafar Razeq, Richard Martinello, Albert Ko, Marie-Louise Landry, Nathan Grubaugh                                                                                                                                                                                                                                               |
| EPI_ISL_416419 | hCoV-19/USA/CT-Yale-005/2020          | North America / USA / Connecticut | 2020-03-09 | Connecticut State Department of Public Health                                                                                                       | Grubaugh Lab - Yale School of Public Health                                                                                                                         | Joseph Fauver, Chantal Vogels, Anderson Brito, Tara Alpert, Nagarjuna Cheemarla, Ellen Foxman, Anthony Muyombwe, Jafar Razeq, Richard Martinello, Albert Ko, Marie-Louise Landry, Nathan Grubaugh                                                                                                                                                                                                                                               |
| EPI_ISL_416420 | hCoV-19/USA/CT-Yale-006/2020          | North America / USA / Connecticut | 2020-03-13 | Yale Clinical Virology Laboratory                                                                                                                   | Grubaugh Lab - Yale School of Public Health                                                                                                                         | Joseph Fauver, Chantal Vogels, Anderson Brito, Tara Alpert, Nagarjuna Cheemarla, Ellen Foxman, Anthony Muyombwe, Jafar Razeq, Richard Martinello, Albert Ko, Marie-Louise Landry, Nathan Grubaugh                                                                                                                                                                                                                                               |
| EPI_ISL_416421 | hCoV-19/USA/CT-Yale-007/2020          | North America / USA / Connecticut | 2020-03-13 | Yale Clinical Virology Laboratory                                                                                                                   | Grubaugh Lab - Yale School of Public Health                                                                                                                         | Joseph Fauver, Chantal Vogels, Anderson Brito, Tara Alpert, Nagarjuna Cheemarla, Ellen Foxman, Anthony Muyombwe, Jafar Razeq, Richard Martinello, Albert Ko, Marie-Louise Landry, Nathan Grubaugh                                                                                                                                                                                                                                               |
| EPI_ISL_416422 | hCoV-19/USA/CT-Yale-008/2020          | North America / USA / Connecticut | 2020-03-13 | Yale Clinical Virology Laboratory                                                                                                                   | Grubaugh Lab - Yale School of Public Health                                                                                                                         | Joseph Fauver, Chantal Vogels, Anderson Brito, Tara Alpert, Nagarjuna Cheemarla, Ellen Foxman, Anthony Muyombwe, Jafar Razeq, Richard Martinello, Albert Ko, Marie-Louise Landry, Nathan Grubaugh                                                                                                                                                                                                                                               |
| EPI_ISL_416423 | hCoV-19/USA/CT-Yale-009/2020          | North America / USA / Connecticut | 2020-03-12 | Yale Clinical Virology Laboratory                                                                                                                   | Grubaugh Lab - Yale School of Public Health                                                                                                                         | Joseph Fauver, Chantal Vogels, Anderson Brito, Tara Alpert, Nagarjuna Cheemarla, Ellen Foxman, Anthony Muyombwe, Jafar Razeq, Richard Martinello, Albert Ko, Marie-Louise Landry, Nathan Grubaugh                                                                                                                                                                                                                                               |
| EPI_ISL_416424 | hCoV-19/USA/CT-Yale-010/2020          | North America / USA / Connecticut | 2020-03-14 | Yale Clinical Virology Laboratory                                                                                                                   | Grubaugh Lab - Yale School of Public Health                                                                                                                         | Joseph Fauver, Chantal Vogels, Anderson Brito, Tara Alpert, Nagarjuna Cheemarla, Ellen Foxman, Anthony Muyombwe, Jafar Razeq, Richard Martinello, Albert Ko, Marie-Louise Landry, Nathan Grubaugh                                                                                                                                                                                                                                               |
| EPI_ISL_450404 | hCoV-19/Hong Kong/VM20009579/2020     | Asia / Hong Kong                  | 2020-03-16 | unknown<br>Korea Centers for Disease Control & Prevention (KCDC)<br>Center for Laboratory Control of Infectious Diseases Division of Viral Diseases | School of Public Health<br>Korea Centers for Disease Control & Prevention (KCDC)<br>Center for Laboratory Control of Infectious Diseases Division of Viral Diseases | Sit,T.H.S., Brackman,C.J., Sims,L.D., Tsang,D.N.C., Chu,D.K.W., Perera,R.A.P.M., Poon,L.L.M. and Peiris,M.                                                                                                                                                                                                                                                                                                                                      |
| EPI_ISL_407193 | hCoV-19/South Korea/KCDC03/2020       | Asia / South Korea / Gyeonggi-do  | 2020-01-25 | Virology Laboratory National Institute for Infectious Diseases 'Lazzaro Spallanzani' IRCCS                                                          | Virology Laboratory National Institute for Infectious Diseases 'Lazzaro Spallanzani' IRCCS                                                                          | Jeong-Min Kim, Yoon-Seok Chung, Namjoo Lee, Mi-Seon Kim, SangHee Woo, Hye-Joon Jo, Sehee Park, Heui Man Kim, Myung Guk Han                                                                                                                                                                                                                                                                                                                      |
| EPI_ISL_408068 | hCoV-19/Italy/INMI1/2020              | Europe / Italy / Rome             | 2020-01-29 | Respiratory Virus Unit, Microbiology Services Colindale, Public Health England                                                                      | Respiratory Virus Unit, Microbiology Services Colindale, Public Health England                                                                                      | Matusali,G., Nicastri,E., Ippolito,G. and Castilletti,C.<br>Monica Galiano, Shahjahan Miah, Angie Lackenby, Omolola Akinbami, Tiina Talts, Leena Bhaw, Richard Myers, Steven Platt, Kirstin Edwards, Jonathan Hubb, Joanna Ellis, Maria Zambon                                                                                                                                                                                                  |
| EPI_ISL_412116 | hCoV-19/England/09c/2020              | Europe / United Kingdom / England | 2020-02-09 | Centro Hospital do Porto, E.P.E. - H. Geral de Santo Antonio                                                                                        | Instituto Nacional de Saude (INSA)                                                                                                                                  | Raquel Guiomar, Inês Costa, Pedro Pechirra, Joana Mendonça, Luis Vieira, Helena Ramos, Joana Isidro, Vítor Borges, João Paulo Gomes                                                                                                                                                                                                                                                                                                             |
| EPI_ISL_413647 | hCoV-19/Portugal/CV62/2020            | Europe / Portugal                 | 2020-03-01 | Centro Hospitalar e Universitário de Sao Joao, Porto                                                                                                | Instituto Nacional de Saude (INSA)                                                                                                                                  | Raquel Guiomar, Inês Costa, Pedro Pechirra, Joana Mendonça, Luis Vieira, João Tiago Guimaraes, Joana Isidro, Vítor Borges, João Paulo Gomes                                                                                                                                                                                                                                                                                                     |
| EPI_ISL_413648 | hCoV-19/Portugal/CV63/2020            | Europe / Portugal                 | 2020-03-01 | UW Virology Lab                                                                                                                                     | UW Virology Lab                                                                                                                                                     | Pavitra Roychoudhury, Hong Xie, Keith Jerome, Alexander Greninger                                                                                                                                                                                                                                                                                                                                                                               |
| EPI_ISL_413649 | hCoV-19/USA/WA14-UW10/2020            | North America / USA / Washington  | 2020-03-05 | UW Virology Lab                                                                                                                                     | UW Virology Lab                                                                                                                                                     | Pavitra Roychoudhury, Hong Xie, Keith Jerome, Alexander Greninger                                                                                                                                                                                                                                                                                                                                                                               |
| EPI_ISL_413650 | hCoV-19/USA/WA15-UW11/2020            | North America / USA / Washington  | 2020-03-05 | UW Virology Lab                                                                                                                                     | UW Virology Lab                                                                                                                                                     | Pavitra Roychoudhury, Hong Xie, Keith Jerome, Alexander Greninger                                                                                                                                                                                                                                                                                                                                                                               |
| EPI_ISL_413651 | hCoV-19/USA/WA16-UW12/2020            | North America / USA / Washington  | 2020-03-05 | UW Virology Lab                                                                                                                                     | UW Virology Lab                                                                                                                                                     | Pavitra Roychoudhury, Hong Xie, Keith Jerome, Alexander Greninger                                                                                                                                                                                                                                                                                                                                                                               |
| EPI_ISL_413652 | hCoV-19/USA/WA17-UW13/2020            | North America / USA / Washington  | 2020-03-05 | UW Virology Lab                                                                                                                                     | UW Virology Lab                                                                                                                                                     | Pavitra Roychoudhury, Hong Xie, Keith Jerome, Alexander Greninger                                                                                                                                                                                                                                                                                                                                                                               |
| EPI_ISL_413653 | hCoV-19/USA/WA18-UW14/2020            | North America / USA / Washington  | 2020-03-05 | UW Virology Lab                                                                                                                                     | UW Virology Lab                                                                                                                                                     | Jing Lu, Louis du Plessis, Liu Zhe, Jiufeng Sun, Sarah François, Huifang Lin, Moritz Kraemer, Jingju Peng, Qianlin Xiong, Runyu Yuan, Lillian Zeng, Pingping Zhou, Chuming Liang, Tao Liu, Wei Li, Juan Su, Huanying Zheng, Kang Min, Song Tie, Bo Peng, Shisong Fang, Wenzhe Su, Kuibiao Li, Ruilin Sun, Ru bai, Xi Tang, Minfeng Liang, Nuno Faria, Josh Quick, Andrew Rambaut, Verity Hill, Wenjun Ma, Nick Loman, Oliver Pybus, Changwen Ke |
| EPI_ISL_413866 | hCoV-19/Guangdong/GDSZ202008-P0020/20 | Asia / China / Guangdong          | 2020-02-05 | Guangdong Provincial Institution of Public Health, Guangdong Provincial Center for Disease Control and Prevention                                   | Guangdong Provincial Institution of Public Health                                                                                                                   | Jing Lu, Louis du Plessis, Liu Zhe, Jiufeng Sun, Sarah François, Huifang Lin, Moritz Kraemer, Jingju Peng, Qianlin Xiong, Runyu Yuan, Lillian Zeng, Pingping Zhou, Chuming Liang, Tao Liu, Wei Li, Juan Su, Huanying Zheng, Kang Min, Song Tie, Bo Peng, Shisong Fang, Wenzhe Su, Kuibiao Li, Ruilin Sun, Ru bai, Xi Tang, Minfeng Liang, Nuno Faria, Josh Quick, Andrew Rambaut, Verity Hill, Wenjun Ma, Nick Loman, Oliver Pybus, Changwen Ke |
| EPI_ISL_413867 | hCoV-19/Guangdong/GDSZ202015-P0019/20 | Asia / China / Guangdong          | 2020-02-05 | Guangdong Provincial Institution of Public Health, Guangdong Provincial Center for Disease Control and Prevention                                   | Guangdong Provincial Institution of Public Health                                                                                                                   | Jing Lu, Louis du Plessis, Liu Zhe, Jiufeng Sun, Sarah François, Huifang Lin, Moritz Kraemer, Jingju Peng, Qianlin Xiong, Runyu Yuan, Lillian Zeng, Pingping Zhou, Chuming Liang, Tao Liu, Wei Li, Juan Su, Huanying Zheng, Kang Min, Song Tie, Bo Peng, Shisong Fang, Wenzhe Su, Kuibiao Li, Ruilin Sun, Ru bai, Xi Tang, Minfeng Liang, Nuno Faria, Josh Quick, Andrew Rambaut, Verity Hill, Wenjun Ma, Nick Loman, Oliver Pybus, Changwen Ke |
| EPI_ISL_413868 | hCoV-19/Guangdong/DG-S9-P0045/2020    | Asia / China / Guangdong          | 2020-02-28 | Guangdong Provincial Institution of Public Health, Guangdong Provincial Center for Disease Control and Prevention                                   | Guangdong Provincial Institution of Public Health                                                                                                                   | Jing Lu, Louis du Plessis, Liu Zhe, Jiufeng Sun, Sarah François, Huifang Lin, Moritz Kraemer, Jingju Peng, Qianlin Xiong, Runyu Yuan, Lillian Zeng, Pingping Zhou, Chuming Liang, Tao Liu, Wei Li, Juan Su, Huanying Zheng, Kang Min, Song Tie, Bo Peng, Shisong Fang, Wenzhe Su, Kuibiao Li, Ruilin Sun, Ru bai, Xi Tang, Minfeng Liang, Nuno Faria, Josh Quick, Andrew Rambaut, Verity Hill, Wenjun Ma, Nick Loman, Oliver Pybus, Changwen Ke |
| EPI_ISL_413869 | hCoV-19/Guangdong/FS-S42-P0046/2020   | Asia / China / Guangdong          | 2020-02-28 | Guangdong Provincial Institution of Public Health, Guangdong Provincial Center for Disease Control and Prevention                                   | Guangdong Provincial Institution of Public Health                                                                                                                   | Jing Lu, Louis du Plessis, Liu Zhe, Jiufeng Sun, Sarah François, Huifang Lin, Moritz Kraemer, Jingju Peng, Qianlin Xiong, Runyu Yuan, Lillian Zeng, Pingping Zhou, Chuming Liang, Tao Liu, Wei Li, Juan Su, Huanying Zheng, Kang Min, Song Tie, Bo Peng, Shisong Fang, Wenzhe Su, Kuibiao Li, Ruilin Sun, Ru bai, Xi Tang, Minfeng Liang, Nuno Faria, Josh Quick, Andrew Rambaut, Verity Hill, Wenjun Ma, Nick Loman, Oliver Pybus, Changwen Ke |



|                |                                      |                                     |            |                                                                                                                      |                                                                                                                                 |                                                                                                                                                                                                                                                                                                                                                                                                                                                 |
|----------------|--------------------------------------|-------------------------------------|------------|----------------------------------------------------------------------------------------------------------------------|---------------------------------------------------------------------------------------------------------------------------------|-------------------------------------------------------------------------------------------------------------------------------------------------------------------------------------------------------------------------------------------------------------------------------------------------------------------------------------------------------------------------------------------------------------------------------------------------|
| EPI_ISL_413893 | hCoV-19/Guangdong/FS-S50-P0053/2020  | Asia / China / Guangdong            | 2020-02-28 | Guangdong Provincial Institution of Public Health,<br>Guangdong Provincial Center for Disease Control and Prevention | Guangdong Provincial Institution of Public Health                                                                               | Jing Lu, Louis du Plessis, Liu Zhe, Jiufeng Sun, Sarah François, Huifang Lin, Moritz Kraemer, Jingju Peng, Qianlin Xiong, Runyu Yuan, Lillian Zeng, Pingping Zhou, Chuming Liang, Tao Liu, Wei Li, Juan Su, Huanying Zheng, Kang Min, Song Tie, Bo Peng, Shisong Fang, Wenzhe Su, Kuibiao Li, Ruilin Sun, Ru bai, Xi Tang, Minfeng Liang, Nuno Faria, Josh Quick, Andrew Rambaut, Verity Hill, Wenjun Ma, Nick Loman, Oliver Pybus, Changwen Ke |
| EPI_ISL_413894 | hCoV-19/Guangdong/DG-S2-P0054/2020   | Asia / China / Guangdong            | 2020-02-28 | Guangdong Provincial Institution of Public Health,<br>Guangdong Provincial Center for Disease Control and Prevention | Guangdong Provincial Institution of Public Health                                                                               | Jing Lu, Louis du Plessis, Liu Zhe, Jiufeng Sun, Sarah François, Huifang Lin, Moritz Kraemer, Jingju Peng, Qianlin Xiong, Runyu Yuan, Lillian Zeng, Pingping Zhou, Chuming Liang, Tao Liu, Wei Li, Juan Su, Huanying Zheng, Kang Min, Song Tie, Bo Peng, Shisong Fang, Wenzhe Su, Kuibiao Li, Ruilin Sun, Ru bai, Xi Tang, Minfeng Liang, Nuno Faria, Josh Quick, Andrew Rambaut, Verity Hill, Wenjun Ma, Nick Loman, Oliver Pybus, Changwen Ke |
| EPI_ISL_413895 | hCoV-19/Guangdong/DG-S6-P0055/2020   | Asia / China / Guangdong            | 2020-02-28 | Guangdong Provincial Institution of Public Health,<br>Guangdong Provincial Center for Disease Control and Prevention | Guangdong Provincial Institution of Public Health                                                                               | Jing Lu, Louis du Plessis, Liu Zhe, Jiufeng Sun, Sarah François, Huifang Lin, Moritz Kraemer, Jingju Peng, Qianlin Xiong, Runyu Yuan, Lillian Zeng, Pingping Zhou, Chuming Liang, Tao Liu, Wei Li, Juan Su, Huanying Zheng, Kang Min, Song Tie, Bo Peng, Shisong Fang, Wenzhe Su, Kuibiao Li, Ruilin Sun, Ru bai, Xi Tang, Minfeng Liang, Nuno Faria, Josh Quick, Andrew Rambaut, Verity Hill, Wenjun Ma, Nick Loman, Oliver Pybus, Changwen Ke |
| EPI_ISL_413896 | hCoV-19/Guangdong/DG-S41-P0056/2020  | Asia / China / Guangdong            | 2020-02-28 | Guangdong Provincial Institution of Public Health,<br>Guangdong Provincial Center for Disease Control and Prevention | Guangdong Provincial Institution of Public Health                                                                               | Jing Lu, Louis du Plessis, Liu Zhe, Jiufeng Sun, Sarah François, Huifang Lin, Moritz Kraemer, Jingju Peng, Qianlin Xiong, Runyu Yuan, Lillian Zeng, Pingping Zhou, Chuming Liang, Tao Liu, Wei Li, Juan Su, Huanying Zheng, Kang Min, Song Tie, Bo Peng, Shisong Fang, Wenzhe Su, Kuibiao Li, Ruilin Sun, Ru bai, Xi Tang, Minfeng Liang, Nuno Faria, Josh Quick, Andrew Rambaut, Verity Hill, Wenjun Ma, Nick Loman, Oliver Pybus, Changwen Ke |
| EPI_ISL_413897 | hCoV-19/Guangdong/SZ-N128-P0057/2020 | Asia / China / Guangdong            | 2020-02-28 | Guangdong Provincial Institution of Public Health,<br>Guangdong Provincial Center for Disease Control and Prevention | Guangdong Provincial Institution of Public Health                                                                               | Jing Lu, Louis du Plessis, Liu Zhe, Jiufeng Sun, Sarah François, Huifang Lin, Moritz Kraemer, Jingju Peng, Qianlin Xiong, Runyu Yuan, Lillian Zeng, Pingping Zhou, Chuming Liang, Tao Liu, Wei Li, Juan Su, Huanying Zheng, Kang Min, Song Tie, Bo Peng, Shisong Fang, Wenzhe Su, Kuibiao Li, Ruilin Sun, Ru bai, Xi Tang, Minfeng Liang, Nuno Faria, Josh Quick, Andrew Rambaut, Verity Hill, Wenjun Ma, Nick Loman, Oliver Pybus, Changwen Ke |
| EPI_ISL_413898 | hCoV-19/Guangdong/ZH-S33-P0058/2020  | Asia / China / Guangdong            | 2020-02-28 | Guangdong Provincial Institution of Public Health,<br>Guangdong Provincial Center for Disease Control and Prevention | Guangdong Provincial Institution of Public Health                                                                               | Jing Lu, Louis du Plessis, Liu Zhe, Jiufeng Sun, Sarah François, Huifang Lin, Moritz Kraemer, Jingju Peng, Qianlin Xiong, Runyu Yuan, Lillian Zeng, Pingping Zhou, Chuming Liang, Tao Liu, Wei Li, Juan Su, Huanying Zheng, Kang Min, Song Tie, Bo Peng, Shisong Fang, Wenzhe Su, Kuibiao Li, Ruilin Sun, Ru bai, Xi Tang, Minfeng Liang, Nuno Faria, Josh Quick, Andrew Rambaut, Verity Hill, Wenjun Ma, Nick Loman, Oliver Pybus, Changwen Ke |
| EPI_ISL_413899 | hCoV-19/Guangdong/ZH-N22-P0059/2020  | Asia / China / Guangdong            | 2020-02-28 | Guangdong Provincial Institution of Public Health,<br>Guangdong Provincial Center for Disease Control and Prevention | Guangdong Provincial Institution of Public Health                                                                               | Jing Lu, Louis du Plessis, Liu Zhe, Jiufeng Sun, Sarah François, Huifang Lin, Moritz Kraemer, Jingju Peng, Qianlin Xiong, Runyu Yuan, Lillian Zeng, Pingping Zhou, Chuming Liang, Tao Liu, Wei Li, Juan Su, Huanying Zheng, Kang Min, Song Tie, Bo Peng, Shisong Fang, Wenzhe Su, Kuibiao Li, Ruilin Sun, Ru bai, Xi Tang, Minfeng Liang, Nuno Faria, Josh Quick, Andrew Rambaut, Verity Hill, Wenjun Ma, Nick Loman, Oliver Pybus, Changwen Ke |
| EPI_ISL_414500 | hCoV-19/England/Sheff01/2020         | Europe / United Kingdom / England / | 2020-03-04 | Virology Department, Sheffield Teaching Hospitals NHS Foundation Trust                                               | Department of Infection, Immunity and Cardiovascular Disease, The Florey Institute, The Medical School, University of Sheffield | Thushan de Silva, Matthew Parker, Matthew Wyles, Mehmet Yavuz, Mohammad Raza, Cariad Evans                                                                                                                                                                                                                                                                                                                                                      |
| EPI_ISL_414501 | hCoV-19/England/Sheff02/2020         | Europe / United Kingdom / England / | 2020-03-03 | Virology Department, Sheffield Teaching Hospitals NHS Foundation Trust                                               | Department of Infection, Immunity and Cardiovascular Disease, The Florey Institute, The Medical School, University of Sheffield | Thushan de Silva, Matthew Parker, Matthew Wyles, Mehmet Yavuz, Mohammad Raza, Cariad Evans                                                                                                                                                                                                                                                                                                                                                      |
| EPI_ISL_414504 | hCoV-19/Germany/NRW-05/2020          | Europe / Germany / North Rhine Wes  | 2020-02-26 | Center of Medical Microbiology, Virology, and Hospital Hygiene, University of Duesseldorf                            | Center of Medical Microbiology, Virology, and Hospital Hygiene, University of Duesseldorf                                       | Ortwin Adams, Marcel Andree, Alexander Diltthey, Torsten Feldt, Sandra Hauka, Torsten Houwaart, Björn-Erik Jensen, Detlef Kindgen-Milles, Malte Kohns Vasconcelos, Klaus Pfeffer, Tina Senff, Daniel Strelow, Jörg Timm, Andreas Walker, Tobias Wienemann                                                                                                                                                                                       |
| EPI_ISL_414505 | hCoV-19/Germany/NRW-06/2020          | Europe / Germany / North Rhine Wes  | 2020-02-27 | Center of Medical Microbiology, Virology, and Hospital Hygiene, University of Duesseldorf                            | Center of Medical Microbiology, Virology, and Hospital Hygiene, University of Duesseldorf                                       | Ortwin Adams, Marcel Andree, Alexander Diltthey, Torsten Feldt, Sandra Hauka, Torsten Houwaart, Björn-Erik Jensen, Detlef Kindgen-Milles, Malte Kohns Vasconcelos, Klaus Pfeffer, Tina Senff, Daniel Strelow, Jörg Timm, Andreas Walker, Tobias Wienemann                                                                                                                                                                                       |
| EPI_ISL_414506 | hCoV-19/Germany/NRW-07/2020          | Europe / Germany / North Rhine Wes  | 2020-02-27 | Center of Medical Microbiology, Virology, and Hospital Hygiene, University of Duesseldorf                            | Center of Medical Microbiology, Virology, and Hospital Hygiene, University of Duesseldorf                                       | Ortwin Adams, Marcel Andree, Alexander Diltthey, Torsten Feldt, Sandra Hauka, Torsten Houwaart, Björn-Erik Jensen, Detlef Kindgen-Milles, Malte Kohns Vasconcelos, Klaus Pfeffer, Tina Senff, Daniel Strelow, Jörg Timm, Andreas Walker, Tobias Wienemann                                                                                                                                                                                       |
| EPI_ISL_414507 | hCoV-19/Germany/NRW-011/2020         | Europe / Germany / North Rhine Wes  | 2020-03-03 | Center of Medical Microbiology, Virology, and Hospital Hygiene, University of Duesseldorf                            | Center of Medical Microbiology, Virology, and Hospital Hygiene, University of Duesseldorf                                       | Ortwin Adams, Marcel Andree, Alexander Diltthey, Torsten Feldt, Sandra Hauka, Torsten Houwaart, Björn-Erik Jensen, Detlef Kindgen-Milles, Malte Kohns Vasconcelos, Klaus Pfeffer, Tina Senff, Daniel Strelow, Jörg Timm, Andreas Walker, Tobias Wienemann                                                                                                                                                                                       |
| EPI_ISL_414508 | hCoV-19/Germany/NRW-08/2020          | Europe / Germany / North Rhine Wes  | 2020-02-27 | Center of Medical Microbiology, Virology, and Hospital Hygiene, University of Duesseldorf                            | Center of Medical Microbiology, Virology, and Hospital Hygiene, University of Duesseldorf                                       | Ortwin Adams, Marcel Andree, Alexander Diltthey, Torsten Feldt, Sandra Hauka, Torsten Houwaart, Björn-Erik Jensen, Detlef Kindgen-Milles, Malte Kohns Vasconcelos, Klaus Pfeffer, Tina Senff, Daniel Strelow, Jörg Timm, Andreas Walker, Tobias Wienemann                                                                                                                                                                                       |
| EPI_ISL_414509 | hCoV-19/Germany/NRW-09/2020          | Europe / Germany / North Rhine Wes  | 2020-02-28 | Center of Medical Microbiology, Virology, and Hospital Hygiene, University of Duesseldorf                            | Center of Medical Microbiology, Virology, and Hospital Hygiene, University of Duesseldorf                                       | Ortwin Adams, Marcel Andree, Alexander Diltthey, Torsten Feldt, Sandra Hauka, Torsten Houwaart, Björn-Erik Jensen, Detlef Kindgen-Milles, Malte Kohns Vasconcelos, Klaus Pfeffer, Tina Senff, Daniel Strelow, Jörg Timm, Andreas Walker, Tobias Wienemann                                                                                                                                                                                       |



|                |                                          |                                      |            |                              |                                                                                                                            |                                                                                                                                                                                                                                                                                                                                                                                                                                   |
|----------------|------------------------------------------|--------------------------------------|------------|------------------------------|----------------------------------------------------------------------------------------------------------------------------|-----------------------------------------------------------------------------------------------------------------------------------------------------------------------------------------------------------------------------------------------------------------------------------------------------------------------------------------------------------------------------------------------------------------------------------|
| EPI_ISL_414510 | hCoV-19/Shanghai/SH01/2020               | Asia / China / Shanghai              | 2020-02-02 | unknown                      | Key Laboratory of Medical Molecular Virology (MOE/NHC/CAMS)<br>Ryota Kumagai Tokyo Metropolitan Institute of Public Health | Zhang,R., Yi,Z., Wang,Y., Teng,Z., Xu,W., Song,W., Cai,X., Sun,Z., Gu,C., Zhou,Y., Chen,H., Ye,R., Han,W., Zhu,Y., Feng,F., Fang,F., Li,C., Zhang,X., Qu,D., Fu,C., Xie,Y. and Yuan,Z.                                                                                                                                                                                                                                            |
| EPI_ISL_414511 | hCoV-19/Japan/TKYE6182/2020              | Asia / Japan                         | 2020-01    | unknown                      |                                                                                                                            | Kumagai,R., Yoshida,I., Nagashima,M., Chiba,T. and Sadamasu,K.                                                                                                                                                                                                                                                                                                                                                                    |
| EPI_ISL_414512 | hCoV-19/Italy/NIAA05032020/2020          | Europe / Italy                       | 2020-03-05 | unknown                      | Dipartimento di Medicina e Chirurgia                                                                                       | Genoni A.P., Bai, A. and Rossi, A.<br>Karbalaei Niya,M.H., Laali,A., Tabibzadeh,A., Safarnezhad Tameshkel,F., Zamani,F., Sohrabi,M.R., Ranjbar,M., Savaj,S., Rezaie,N., Ajdarkosh,H., Keyvani,H., Khoonsari,M., Ameli,M., Nikkha,M., Ghanbari,B., Faraji,A., Jamshidi Makiani,M. and Roham,M.                                                                                                                                     |
| EPI_ISL_414513 | hCoV-19/Iran/MHKN-2/2020                 | Asia / Iran                          | 2020-02-29 | unknown                      | Gastrointestinal and Liver Diseases Research Center                                                                        | Karbalaei Niya,M.H., Laali,A., Tabibzadeh,A., Safarnezhad Tameshkel,F., Zamani,F., Sohrabi,M.R., Ranjbar,M., Savaj,S., Rezaie,N., Ajdarkosh,H., Keyvani,H., Khoonsari,M., Ameli,M., Nikkha,M., Ghanbari,B., Faraji,A., Jamshidi Makiani,M. and Roham,M.                                                                                                                                                                           |
| EPI_ISL_414514 | hCoV-19/Iran/MKHN-4/2020                 | Asia / Iran                          | 2020-02-29 | unknown                      | Gastrointestinal and Liver Diseases Research Center                                                                        | Kumar,P., Dhar,M., Vashista,H., Singh,P., Sharma,U., Singh,S., Saini,N., Lail,H., Bala,M., Singh,S.K. and Rakshit,P.                                                                                                                                                                                                                                                                                                              |
| EPI_ISL_414515 | hCoV-19/India/341/2020                   | Asia / India                         | 2020-02-29 | unknown                      | Biotechnology, National Centre for Disease Control                                                                         | Hamed Asl,D., Soleimani,M., Mirzapour,M., Shabadori,A. and Kamali,M.                                                                                                                                                                                                                                                                                                                                                              |
| EPI_ISL_414516 | hCoV-19/Iran/mehr1/2020                  | Asia / Iran                          | 2020-02-29 | unknown                      | Molecular Pathology                                                                                                        | Dominic N.C. Tsang, Daniel K.W. Chu, Leo L.M. Poon, Malik Peiris                                                                                                                                                                                                                                                                                                                                                                  |
| EPI_ISL_414517 | hCoV-19/Hong Kong/VM20002907/2020        | Asia / Hong Kong                     | 2020-02-25 |                              | Hong Kong Department of Health<br>Tai Lung Veterinary Laboratory, Agriculture, Fisheries and Conservation Department       | Thomas S.H. Chung, Christopher J Brackman, Daniel K.W. Chu, Leo L.M. Poon, Malik Peiris                                                                                                                                                                                                                                                                                                                                           |
| EPI_ISL_414518 | hCoV-19/canine/Hong Kong/20-02756/2020   | Asia / Hong Kong                     | 2020-02-26 |                              | Hong Kong Department of Health                                                                                             | Dominic N.C. Tsang, Daniel K.W. Chu, Leo L.M. Poon, Malik Peiris                                                                                                                                                                                                                                                                                                                                                                  |
| EPI_ISL_414519 | hCoV-19/Hong Kong/VM20002868/2020        | Asia / Hong Kong                     | 2020-02-24 |                              | Bundeswehr Institute of Microbiology                                                                                       | Mathias C Walter, Markus H Antwerpen and Roman Wölfel                                                                                                                                                                                                                                                                                                                                                                             |
| EPI_ISL_414520 | hCoV-19/Germany/BavPat2/2020             | Europe / Germany / Munich            | 2020-03-02 |                              | Bundeswehr Institute of Microbiology                                                                                       | Mathias C Walter, Markus H Antwerpen and Roman Wölfel                                                                                                                                                                                                                                                                                                                                                                             |
| EPI_ISL_414521 | hCoV-19/Germany/BavPat3/2020             | Europe / Germany / Munich            | 2020-03-02 |                              | Bundeswehr Institute of Microbiology                                                                                       | Monica Galiano, Shahjahan Miah, Angie Lackenby, Omolola Akinbami, Tiina Talts, Leena Bhaw, Richard Myers, Steven Platt, Kirstin Edwards, Jonathan Hubb, Joanna Ellis, Maria Zambon                                                                                                                                                                                                                                                |
| EPI_ISL_414522 | hCoV-19/England/200990002/2020           | Europe / United Kingdom / England    | 2020-02-28 |                              | Respiratory Virus Unit, Microbiology Services Colindale, Public Health England                                             | Monica Galiano, Shahjahan Miah, Angie Lackenby, Omolola Akinbami, Tiina Talts, Leena Bhaw, Richard Myers, Steven Platt, Kirstin Edwards, Jonathan Hubb, Joanna Ellis, Maria Zambon                                                                                                                                                                                                                                                |
| EPI_ISL_414523 | hCoV-19/England/200990660/2020           | Europe / United Kingdom / England    | 2020-02-27 |                              | Respiratory Virus Unit, Microbiology Services Colindale, Public Health England                                             | Monica Galiano, Shahjahan Miah, Angie Lackenby, Omolola Akinbami, Tiina Talts, Leena Bhaw, Richard Myers, Steven Platt, Kirstin Edwards, Jonathan Hubb, Joanna Ellis, Maria Zambon                                                                                                                                                                                                                                                |
| EPI_ISL_414524 | hCoV-19/England/200991076/2020           | Europe / United Kingdom / England    | 2020-03-01 |                              | Respiratory Virus Unit, Microbiology Services Colindale, Public Health England                                             | Monica Galiano, Shahjahan Miah, Angie Lackenby, Omolola Akinbami, Tiina Talts, Leena Bhaw, Richard Myers, Steven Platt, Kirstin Edwards, Jonathan Hubb, Joanna Ellis, Maria Zambon                                                                                                                                                                                                                                                |
| EPI_ISL_414525 | hCoV-19/England/201040081/2020           | Europe / United Kingdom / England    | 2020-03-02 |                              | Respiratory Virus Unit, Microbiology Services Colindale, Public Health England                                             | Monica Galiano, Shahjahan Miah, Angie Lackenby, Omolola Akinbami, Tiina Talts, Leena Bhaw, Richard Myers, Steven Platt, Kirstin Edwards, Jonathan Hubb, Joanna Ellis, Maria Zambon                                                                                                                                                                                                                                                |
| EPI_ISL_414526 | hCoV-19/England/201040141/2020           | Europe / United Kingdom / England    | 2020-03-03 |                              | Respiratory Virus Unit, Microbiology Services Colindale, Public Health England                                             | Monica Galiano, Shahjahan Miah, Angie Lackenby, Omolola Akinbami, Tiina Talts, Leena Bhaw, Richard Myers, Steven Platt, Kirstin Edwards, Jonathan Hubb, Joanna Ellis, Maria Zambon                                                                                                                                                                                                                                                |
| EPI_ISL_414527 | hCoV-19/Hong Kong/VM20002493/2020        | Asia / Hong Kong                     | 2020-02-09 |                              | Hong Kong Department of Health                                                                                             | Dominic N.C. Tsang, Daniel K.W. Chu, Leo L.M. Poon, Malik Peiris                                                                                                                                                                                                                                                                                                                                                                  |
| EPI_ISL_414528 | hCoV-19/Hong Kong/VM20002507/2020        | Asia / Hong Kong                     | 2020-02-10 |                              | Hong Kong Department of Health                                                                                             | Dominic N.C. Tsang, Daniel K.W. Chu, Leo L.M. Poon, Malik Peiris                                                                                                                                                                                                                                                                                                                                                                  |
| EPI_ISL_414529 | hCoV-19/Netherlands/NoordBrabant_20/2020 | Europe / Netherlands / Noord Brabant | 2020-03-04 | Dutch COVID-19 response team | Erasmus Medical Center                                                                                                     | David Nieuwenhuijse, Bas Oude Munnink, Reina Sikkema, Claudia Schapendonk, Irina Chestakova, Anne van der Linden, Mark Pronk, Pascal Lexmond, Corien Swaan, Manon Haverkate, Madelief Mollers, Mart Stein, Sandra Kengne Kamga Mobou, Jeroen van Kampen, Jolanda Voermans, Aura Timen, Corine GeurtsvanKessel, Annemiek van der Eijk, Richard Molenkamp, Marion Koopmans, on behalf of the Dutch national COVID-19 response team. |
| EPI_ISL_414530 | hCoV-19/Netherlands/NoordBrabant_21/2020 | Europe / Netherlands / Noord Brabant | 2020-03-04 | Dutch COVID-19 response team | Erasmus Medical Center                                                                                                     | David Nieuwenhuijse, Bas Oude Munnink, Reina Sikkema, Claudia Schapendonk, Irina Chestakova, Anne van der Linden, Mark Pronk, Pascal Lexmond, Corien Swaan, Manon Haverkate, Madelief Mollers, Mart Stein, Sandra Kengne Kamga Mobou, Jeroen van Kampen, Jolanda Voermans, Aura Timen, Corine GeurtsvanKessel, Annemiek van der Eijk, Richard Molenkamp, Marion Koopmans, on behalf of the Dutch national COVID-19 response team. |
| EPI_ISL_414531 | hCoV-19/Netherlands/NoordBrabant_22/2020 | Europe / Netherlands / Noord Brabant | 2020-03-04 | Dutch COVID-19 response team | Erasmus Medical Center                                                                                                     | David Nieuwenhuijse, Bas Oude Munnink, Reina Sikkema, Claudia Schapendonk, Irina Chestakova, Anne van der Linden, Mark Pronk, Pascal Lexmond, Corien Swaan, Manon Haverkate, Madelief Mollers, Mart Stein, Sandra Kengne Kamga Mobou, Jeroen van Kampen, Jolanda Voermans, Aura Timen, Corine GeurtsvanKessel, Annemiek van der Eijk, Richard Molenkamp, Marion Koopmans, on behalf of the Dutch national COVID-19 response team. |
| EPI_ISL_414532 | hCoV-19/Netherlands/NoordBrabant_23/2020 | Europe / Netherlands / Noord Brabant | 2020-03-05 | Dutch COVID-19 response team | Erasmus Medical Center                                                                                                     | David Nieuwenhuijse, Bas Oude Munnink, Reina Sikkema, Claudia Schapendonk, Irina Chestakova, Anne van der Linden, Mark Pronk, Pascal Lexmond, Corien Swaan, Manon Haverkate, Madelief Mollers, Mart Stein, Sandra Kengne Kamga Mobou, Jeroen van Kampen, Jolanda Voermans, Aura Timen, Corine GeurtsvanKessel, Annemiek van der Eijk, Richard Molenkamp, Marion Koopmans, on behalf of the Dutch national COVID-19 response team. |

|                |                                          |                                      |            |                              |                        |                                                                                                                                                                                                                                                                                                                                                                                                                                   |
|----------------|------------------------------------------|--------------------------------------|------------|------------------------------|------------------------|-----------------------------------------------------------------------------------------------------------------------------------------------------------------------------------------------------------------------------------------------------------------------------------------------------------------------------------------------------------------------------------------------------------------------------------|
| EPI_ISL_414533 | hCoV-19/Netherlands/NoordBrabant_24/2020 | Europe / Netherlands / Noord Brabant | 2020-03-06 | Dutch COVID-19 response team | Erasmus Medical Center | David Nieuwenhuijse, Bas Oude Munnink, Reina Sikkema, Claudia Schapendonk, Irina Chestakova, Anne van der Linden, Mark Pronk, Pascal Lexmond, Corien Swaan, Manon Haverkate, Madelief Mollers, Mart Stein, Sandra Kengne Kamga Mobou, Jeroen van Kampen, Jolanda Voermans, Aura Timen, Corine GeurtsvanKessel, Annemiek van der Eijk, Richard Molenkamp, Marion Koopmans, on behalf of the Dutch national COVID-19 response team. |
| EPI_ISL_414534 | hCoV-19/Netherlands/NoordBrabant_25/2020 | Europe / Netherlands / Noord Brabant | 2020-03-06 | Dutch COVID-19 response team | Erasmus Medical Center | David Nieuwenhuijse, Bas Oude Munnink, Reina Sikkema, Claudia Schapendonk, Irina Chestakova, Anne van der Linden, Mark Pronk, Pascal Lexmond, Corien Swaan, Manon Haverkate, Madelief Mollers, Mart Stein, Sandra Kengne Kamga Mobou, Jeroen van Kampen, Jolanda Voermans, Aura Timen, Corine GeurtsvanKessel, Annemiek van der Eijk, Richard Molenkamp, Marion Koopmans, on behalf of the Dutch national COVID-19 response team. |
| EPI_ISL_414535 | hCoV-19/Netherlands/NoordBrabant_26/2020 | Europe / Netherlands / Noord Brabant | 2020-03-06 | Dutch COVID-19 response team | Erasmus Medical Center | David Nieuwenhuijse, Bas Oude Munnink, Reina Sikkema, Claudia Schapendonk, Irina Chestakova, Anne van der Linden, Mark Pronk, Pascal Lexmond, Corien Swaan, Manon Haverkate, Madelief Mollers, Mart Stein, Sandra Kengne Kamga Mobou, Jeroen van Kampen, Jolanda Voermans, Aura Timen, Corine GeurtsvanKessel, Annemiek van der Eijk, Richard Molenkamp, Marion Koopmans, on behalf of the Dutch national COVID-19 response team. |
| EPI_ISL_414536 | hCoV-19/Netherlands/NoordBrabant_27/2020 | Europe / Netherlands / Noord Brabant | 2020-03-08 | Dutch COVID-19 response team | Erasmus Medical Center | David Nieuwenhuijse, Bas Oude Munnink, Reina Sikkema, Claudia Schapendonk, Irina Chestakova, Anne van der Linden, Mark Pronk, Pascal Lexmond, Corien Swaan, Manon Haverkate, Madelief Mollers, Mart Stein, Sandra Kengne Kamga Mobou, Jeroen van Kampen, Jolanda Voermans, Aura Timen, Corine GeurtsvanKessel, Annemiek van der Eijk, Richard Molenkamp, Marion Koopmans, on behalf of the Dutch national COVID-19 response team. |
| EPI_ISL_415600 | hCoV-19/USA/WA-UW72/2020                 | North America / USA                  | 2020-03-09 | UW Virology Lab              | UW Virology Lab        | Pavitra Roychoudhury, Hong Xie, Keith Jerome, Alexander Greninger                                                                                                                                                                                                                                                                                                                                                                 |
| EPI_ISL_415601 | hCoV-19/USA/WA-UW73/2020                 | North America / USA / Washington     | 2020-03-10 | UW Virology Lab              | UW Virology Lab        | Pavitra Roychoudhury, Hong Xie, Keith Jerome, Alexander Greninger                                                                                                                                                                                                                                                                                                                                                                 |
| EPI_ISL_415602 | hCoV-19/USA/WA-UW74/2020                 | North America / USA / Washington     | 2020-03-10 | UW Virology Lab              | UW Virology Lab        | Pavitra Roychoudhury, Hong Xie, Keith Jerome, Alexander Greninger                                                                                                                                                                                                                                                                                                                                                                 |
| EPI_ISL_415603 | hCoV-19/USA/WA-UW75/2020                 | North America / USA / Washington     | 2020-03-10 | UW Virology Lab              | UW Virology Lab        | Pavitra Roychoudhury, Hong Xie, Keith Jerome, Alexander Greninger                                                                                                                                                                                                                                                                                                                                                                 |
| EPI_ISL_415604 | hCoV-19/USA/WA-UW76/2020                 | North America / USA / Washington     | 2020-03-10 | UW Virology Lab              | UW Virology Lab        | Pavitra Roychoudhury, Hong Xie, Keith Jerome, Alexander Greninger                                                                                                                                                                                                                                                                                                                                                                 |
| EPI_ISL_415605 | hCoV-19/USA/WA-UW40/2020                 | North America / USA / Washington     | 2020-03-05 | UW Virology Lab              | UW Virology Lab        | Pavitra Roychoudhury, Hong Xie, Keith Jerome, Alexander Greninger                                                                                                                                                                                                                                                                                                                                                                 |
| EPI_ISL_415606 | hCoV-19/USA/WA-UW41/2020                 | North America / USA / Washington     | 2020-03-08 | UW Virology Lab              | UW Virology Lab        | Pavitra Roychoudhury, Hong Xie, Keith Jerome, Alexander Greninger                                                                                                                                                                                                                                                                                                                                                                 |
| EPI_ISL_415607 | hCoV-19/USA/WA-UW42/2020                 | North America / USA / Washington     | 2020-03-09 | UW Virology Lab              | UW Virology Lab        | Pavitra Roychoudhury, Hong Xie, Keith Jerome, Alexander Greninger                                                                                                                                                                                                                                                                                                                                                                 |
| EPI_ISL_415608 | hCoV-19/USA/WA-UW43/2020                 | North America / USA / Washington     | 2020-03-08 | UW Virology Lab              | UW Virology Lab        | Pavitra Roychoudhury, Hong Xie, Keith Jerome, Alexander Greninger                                                                                                                                                                                                                                                                                                                                                                 |
| EPI_ISL_415609 | hCoV-19/USA/WA-UW44/2020                 | North America / USA / Washington     | 2020-03-08 | UW Virology Lab              | UW Virology Lab        | Pavitra Roychoudhury, Hong Xie, Keith Jerome, Alexander Greninger                                                                                                                                                                                                                                                                                                                                                                 |
| EPI_ISL_415610 | hCoV-19/USA/WA-UW45/2020                 | North America / USA / Washington     | 2020-03-08 | UW Virology Lab              | UW Virology Lab        | Pavitra Roychoudhury, Hong Xie, Keith Jerome, Alexander Greninger                                                                                                                                                                                                                                                                                                                                                                 |
| EPI_ISL_415611 | hCoV-19/USA/WA-UW46/2020                 | North America / USA / Washington     | 2020-03-09 | UW Virology Lab              | UW Virology Lab        | Pavitra Roychoudhury, Hong Xie, Keith Jerome, Alexander Greninger                                                                                                                                                                                                                                                                                                                                                                 |
| EPI_ISL_415612 | hCoV-19/USA/WA-UW47/2020                 | North America / USA / Washington     | 2020-03-09 | UW Virology Lab              | UW Virology Lab        | Pavitra Roychoudhury, Hong Xie, Keith Jerome, Alexander Greninger                                                                                                                                                                                                                                                                                                                                                                 |
| EPI_ISL_415613 | hCoV-19/USA/WA-UW48/2020                 | North America / USA / Washington     | 2020-03-09 | UW Virology Lab              | UW Virology Lab        | Pavitra Roychoudhury, Hong Xie, Keith Jerome, Alexander Greninger                                                                                                                                                                                                                                                                                                                                                                 |
| EPI_ISL_415614 | hCoV-19/USA/WA-UW49/2020                 | North America / USA / Washington     | 2020-03-09 | UW Virology Lab              | UW Virology Lab        | Pavitra Roychoudhury, Hong Xie, Keith Jerome, Alexander Greninger                                                                                                                                                                                                                                                                                                                                                                 |
| EPI_ISL_415615 | hCoV-19/USA/WA-UW50/2020                 | North America / USA / Washington     | 2020-03-08 | UW Virology Lab              | UW Virology Lab        | Pavitra Roychoudhury, Hong Xie, Keith Jerome, Alexander Greninger                                                                                                                                                                                                                                                                                                                                                                 |
| EPI_ISL_415616 | hCoV-19/USA/WA-UW51/2020                 | North America / USA / Washington     | 2020-03-08 | UW Virology Lab              | UW Virology Lab        | Pavitra Roychoudhury, Hong Xie, Keith Jerome, Alexander Greninger                                                                                                                                                                                                                                                                                                                                                                 |
| EPI_ISL_415617 | hCoV-19/USA/WA-UW52/2020                 | North America / USA / Washington     | 2020-03-09 | UW Virology Lab              | UW Virology Lab        | Pavitra Roychoudhury, Hong Xie, Keith Jerome, Alexander Greninger                                                                                                                                                                                                                                                                                                                                                                 |
| EPI_ISL_415618 | hCoV-19/USA/WA-UW53/2020                 | North America / USA / Washington     | 2020-03-09 | UW Virology Lab              | UW Virology Lab        | Pavitra Roychoudhury, Hong Xie, Keith Jerome, Alexander Greninger                                                                                                                                                                                                                                                                                                                                                                 |
| EPI_ISL_415619 | hCoV-19/USA/WA-UW54/2020                 | North America / USA / Washington     | 2020-03-09 | UW Virology Lab              | UW Virology Lab        | Pavitra Roychoudhury, Hong Xie, Keith Jerome, Alexander Greninger                                                                                                                                                                                                                                                                                                                                                                 |
| EPI_ISL_415620 | hCoV-19/USA/WA-UW55/2020                 | North America / USA / Washington     | 2020-03-09 | UW Virology Lab              | UW Virology Lab        | Pavitra Roychoudhury, Hong Xie, Keith Jerome, Alexander Greninger                                                                                                                                                                                                                                                                                                                                                                 |
| EPI_ISL_415621 | hCoV-19/USA/WA-UW56/2020                 | North America / USA / Washington     | 2020-03-09 | UW Virology Lab              | UW Virology Lab        | Pavitra Roychoudhury, Hong Xie, Keith Jerome, Alexander Greninger                                                                                                                                                                                                                                                                                                                                                                 |
| EPI_ISL_415622 | hCoV-19/USA/WA-UW57/2020                 | North America / USA / Washington     | 2020-03-09 | UW Virology Lab              | UW Virology Lab        | Pavitra Roychoudhury, Hong Xie, Keith Jerome, Alexander Greninger                                                                                                                                                                                                                                                                                                                                                                 |
| EPI_ISL_415623 | hCoV-19/USA/WA-UW58/2020                 | North America / USA / Washington     | 2020-03-09 | UW Virology Lab              | UW Virology Lab        | Pavitra Roychoudhury, Hong Xie, Keith Jerome, Alexander Greninger                                                                                                                                                                                                                                                                                                                                                                 |
| EPI_ISL_415624 | hCoV-19/USA/WA-UW59/2020                 | North America / USA / Washington     | 2020-03-09 | UW Virology Lab              | UW Virology Lab        | Pavitra Roychoudhury, Hong Xie, Keith Jerome, Alexander Greninger                                                                                                                                                                                                                                                                                                                                                                 |
| EPI_ISL_415625 | hCoV-19/USA/WA-UW60/2020                 | North America / USA / Washington     | 2020-03-09 | UW Virology Lab              | UW Virology Lab        | Pavitra Roychoudhury, Hong Xie, Keith Jerome, Alexander Greninger                                                                                                                                                                                                                                                                                                                                                                 |
